# Supplementary material
Source: PubMed Central journal article supplement (PMC2853178)

**Supplemental Figure 1.** Box plots showing the log residual variance for the regressions of log gene expression with increasing relatedness. The left plot (A) represents all five subjects; the middle plot (B) represents the two sets of related subjects; the right plot (C) represents only the pair of identical twins.

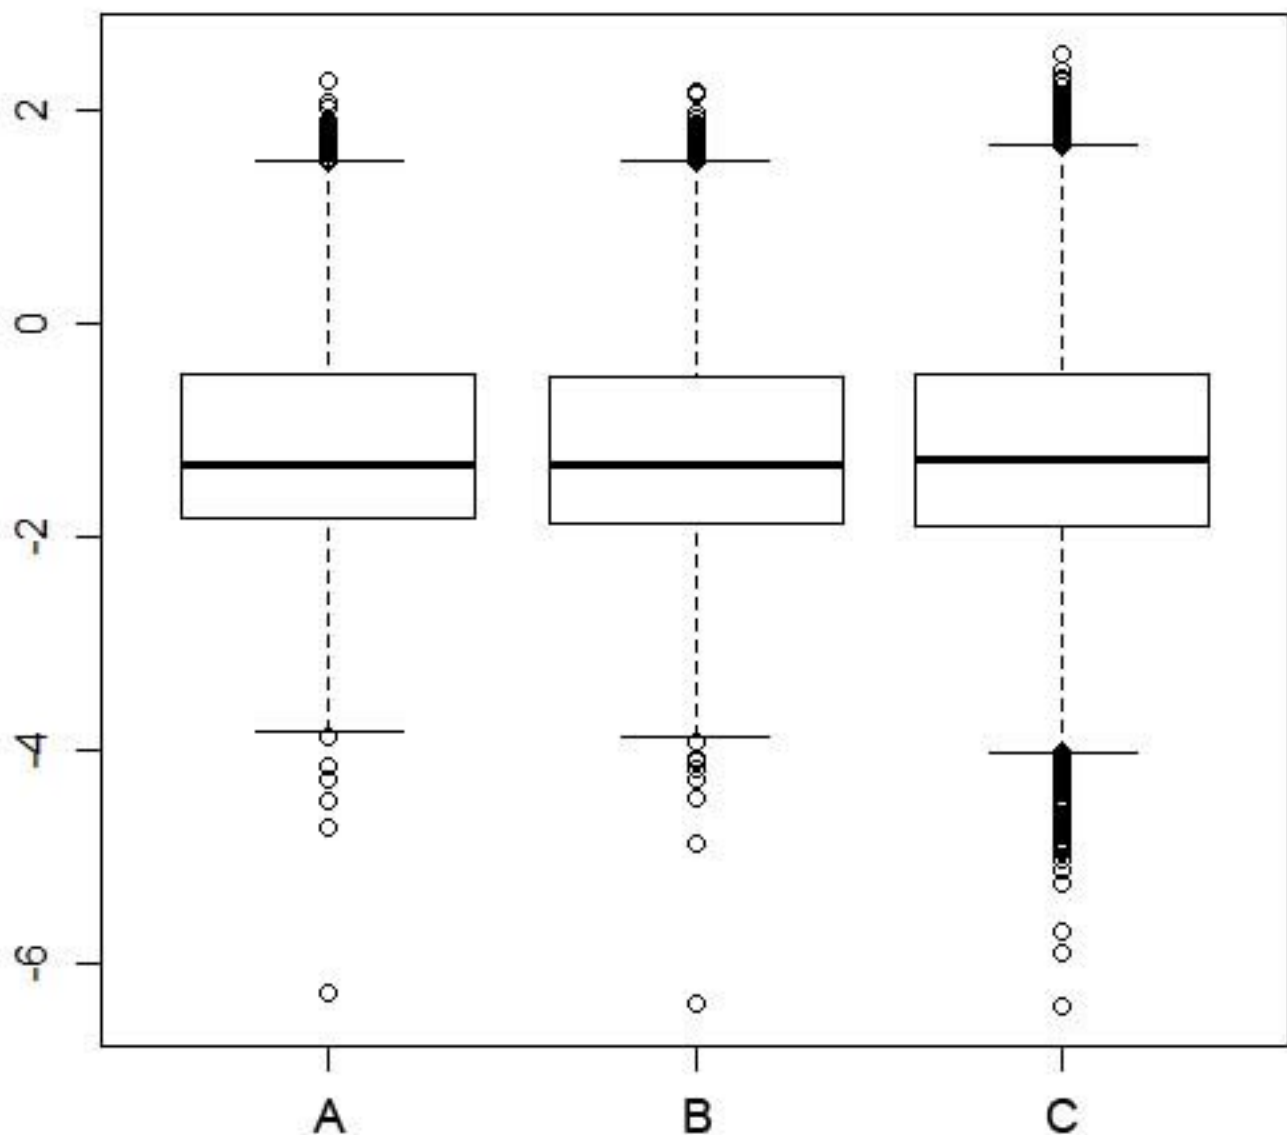

Supplement: NIHMS192028-supplement-Suppl_Fig_01.pdf [file NIHMS192028-supplement-Suppl_Fig_01.pdf]
