# Supplementary material
Source: PubMed Central journal article supplement (PMC2853178)
Supplement: NIHMS192028-supplement-Suppl_Tab_01.pdf [file NIHMS192028-supplement-Suppl_Tab_01.pdf]

| Category: Function:<br>Annotation (p value) | Gene     | Name                                                                      | Description                                                                                                                                                                                                                                                                                                                                                                                      |
|---------------------------------------------|----------|---------------------------------------------------------------------------|--------------------------------------------------------------------------------------------------------------------------------------------------------------------------------------------------------------------------------------------------------------------------------------------------------------------------------------------------------------------------------------------------|
| Behavior: Behavior:<br>Behavior (1.19E-11)  | ABI2     | abl interactor 2                                                          |                                                                                                                                                                                                                                                                                                                                                                                                  |
|                                             | ACCN2    | amiloride-sensitive cation channel 2, neuronal                            | The member encoded by this gene is expressed in most if not all brain neurons, and it may be an ion channel subunit.                                                                                                                                                                                                                                                                             |
|                                             | ADAM2    | ADAM metallopeptidase domain 2                                            | This gene has been implicated in a variety of biological processes involving cell-cell and cell-matrix interactions, including fertilization, muscle development, and neurogenesis.                                                                                                                                                                                                              |
|                                             | ADCY1    | adenylate cyclase 1 (brain)                                               | This gene encodes a form of adenylate cyclase expressed in brain.                                                                                                                                                                                                                                                                                                                                |
|                                             | ADCY5    | adenylate cyclase 5                                                       | ADCY5 belongs to the adenylate cyclase (EC 4.6.1.1) family of enzymes responsible for the synthesis of cAMP.                                                                                                                                                                                                                                                                                     |
|                                             | AFF2     | AF4/FMR2 family, member 2                                                 |                                                                                                                                                                                                                                                                                                                                                                                                  |
|                                             | AGTR1    | angiotensin II receptor, type 1                                           | Angiotensin II is a potent vasopressor hormone and a primary regulator of aldosterone secretion. It is an important effector controlling blood pressure and volume in the cardiovascular system.                                                                                                                                                                                                 |
|                                             | AGTR2    | angiotensin II receptor, type 2                                           | AGTR2 plays a role in the central nervous system and cardiovascular functions that are mediated by the renin-angiotensin system. This receptor mediates programmed cell death (apoptosis).                                                                                                                                                                                                       |
|                                             | ALS2     | amyotrophic lateral sclerosis 2 (juvenile)                                | The protein functions as a guanine nucleotide exchange factor for the small GTPase RAB5.                                                                                                                                                                                                                                                                                                         |
|                                             | AR       | androgen receptor                                                         | This protein functions as a steroid-hormone activated transcription factor.                                                                                                                                                                                                                                                                                                                      |
|                                             | ATM      | ataxia telangiectasia mutated                                             | This protein functions as a regulator of a variety of downstream proteins, including tumor suppressor proteins p53 and BRCA1, checkpoint kinase CHK2, checkpoint proteins RAD17 and RAD9, and DNA repair protein NBS1. This protein is thought to be a master controller of cell cycle checkpoint signaling pathways that are required for cell response to DNA damage and for genome stability. |
|                                             | ATP1A3   | ATPase, Na <sup>+</sup> /K <sup>+</sup> transporting, alpha 3 polypeptide | This Na <sup>+</sup> /K <sup>+</sup> -ATPase is responsible for establishing and maintaining the electrochemical gradients of Na and K ions across the plasma membrane. These gradients are essential for osmoregulation, for sodium-coupled transport of a variety of organic and inorganic molecules, and for electrical excitability of nerve and muscle.                                     |
|                                             | ATP2B2   | ATPase, Ca <sup>++</sup> transporting, plasma membrane 2                  | The protein encoded by this gene removes bivalent calcium ions from eukaryotic cells against very large concentration gradients and plays a critical role in intracellular calcium homeostasis.                                                                                                                                                                                                  |
|                                             | B4GALNT1 | beta-1,4-N-acetyl-galactosaminyl transferase 1                            | GalNAc-T is the enzyme involved in the biosynthesis of G(M2) and G(D2) glycosphingolipids. GalNAc-T catalyzes the transfer of GalNAc into G(M3) and G(D3) by a beta-1,4 linkage, resulting in the synthesis of G(M2) and G(D2), respectively.                                                                                                                                                    |
|                                             | BACE1    | beta-site APP-cleaving enzyme 1                                           | The encoded protein, a member of the peptidase A1 protein family, is a type I integral membrane glycoprotein and aspartic protease that is found mainly in the Golgi.                                                                                                                                                                                                                            |
|                                             | BCL2     | B-cell CLL/lymphoma 2                                                     | This gene encodes an integral outer mitochondrial membrane protein that blocks the apoptotic death of some cells such as lymphocytes.                                                                                                                                                                                                                                                            |
|                                             | CACNA1C  | calcium channel, voltage-dependent, L type, alpha 1C subunit              | This gene encodes an alpha-1 subunit of a voltage-dependent calcium channel. Calcium channels mediate the influx of calcium ions into the cell upon membrane polarization.                                                                                                                                                                                                                       |
|                                             | CCKAR    | cholecystokinin A receptor                                                | This receptor is a major physiologic mediator of pancreatic enzyme secretion and smooth muscle contraction of the gallbladder and stomach. In the central and peripheral nervous system this receptor regulates satiety and the release of beta-endorphin and dopamine.                                                                                                                          |

|         |                                                                               |                                                                                                                                                                                                                                                                    |
|---------|-------------------------------------------------------------------------------|--------------------------------------------------------------------------------------------------------------------------------------------------------------------------------------------------------------------------------------------------------------------|
| CELSR1  | cadherin, EGF LAG seven-pass G-type receptor 1 (flamingo homolog, Drosophila) | This particular member is a developmentally regulated, neural-specific gene which plays an unspecified role in early embryogenesis.                                                                                                                                |
| CHD7    | chromodomain helicase DNA binding protein 7                                   | This gene encodes a protein that contains several helicase family domains.                                                                                                                                                                                         |
| CHL1    | cell adhesion molecule with homology to L1CAM (close homolog of L1)           | The protein encoded by this gene is a neural recognition molecule that may be involved in signal transduction pathways.                                                                                                                                            |
| CHRM1   | cholinergic receptor, muscarinic 1                                            | The muscarinic cholinergic receptor 1 is involved in mediation of vagally-induced bronchoconstriction and in the acid secretion of the gastrointestinal tract.                                                                                                     |
| CHRNA7  | cholinergic receptor, nicotinic, alpha 7                                      | The protein encoded by this gene forms a homo-oligomeric channel, displays marked permeability to calcium ions and is a major component of brain nicotinic receptors that are blocked by, and highly sensitive to, alpha-bungarotoxin.                             |
| CHRN2   | cholinergic receptor, nicotinic, beta 2 (neuronal)                            | The protein encoded by this gene belongs to a superfamily of ligand-gated ion channels which allow the flow of sodium and potassium across the plasma membrane in response to ligands such as acetylcholine and nicotine.                                          |
| CLDN19  | claudin 19                                                                    | The product of this gene plays a major role in tight junction-specific obliteration of the intercellular space, through calcium-independent cell-adhesion activity.                                                                                                |
| CNR1    | cannabinoid receptor 1 (brain)                                                | This gene encodes one of two cannabinoid receptors, which have been found to be involved in the cannabinoid-induced CNS effects (including alterations in mood and cognition) experienced by users of marijuana.                                                   |
| CPLX2   | complexin 2                                                                   | The protein product of this gene binds to the SNAP receptor complex and disrupts it, allowing transmitter release.                                                                                                                                                 |
| CRH     | corticotropin releasing hormone                                               | CRH is secreted by the paraventricular nucleus (PVN) of the hypothalamus in response to stress. In the placenta CRH is a marker that determines the length of gestation and the timing of parturition and delivery. CRH may also act as a trigger for parturition. |
| CRHR1   | corticotropin releasing hormone receptor 1                                    | The encoded protein is essential for the activation of signal transduction pathways that regulate diverse physiological processes including stress, reproduction, immune response and obesity.                                                                     |
| CTNNA2  | catenin (cadherin-associated protein), alpha 2                                |                                                                                                                                                                                                                                                                    |
| CYP11B2 | cytochrome P450, family 11, subfamily B, polypeptide 2                        | This gene encodes a member of the cytochrome P450 superfamily which are monooxygenases which catalyze many reactions involved in drug metabolism and synthesis of cholesterol, steroids and other lipids.                                                          |
| CYP19A1 | cytochrome P450, family 19, subfamily A, polypeptide 1                        | This protein localizes to the endoplasmic reticulum and catalyzes the last steps of estrogen biosynthesis, three successive hydroxylations of the A ring of androgens.                                                                                             |
| DDO     | D-aspartate oxidase                                                           | The protein encoded by this gene is a peroxisomal flavoprotein that catalyzes the oxidative deamination of D-aspartate and N-methyl D-aspartate.                                                                                                                   |
| DKK3    | dickkopf homolog 3 (Xenopus laevis)                                           | This gene encodes a secreted protein involved in embryonic development through its interactions with the Wnt signaling pathway.                                                                                                                                    |
| DLG4    | discs, large homolog 4 (Drosophila)                                           | This MAGUK protein may interact at postsynaptic sites to form a multimeric scaffold for the clustering of receptors, ion channels, and associated signaling proteins.                                                                                              |

|        |                                                                |                                                                                                                                                                                                                                                                                                                                                       |
|--------|----------------------------------------------------------------|-------------------------------------------------------------------------------------------------------------------------------------------------------------------------------------------------------------------------------------------------------------------------------------------------------------------------------------------------------|
| DMBX1  | diencephalon/mesencephalon homeobox 1                          | The encoded protein acts as a transcription factor and may play a role in brain and sensory organ development.                                                                                                                                                                                                                                        |
| DRD4   | dopamine receptor D4                                           | This gene encodes the D4 subtype of the dopamine receptor. Mutations in this gene have been associated with various behavioral phenotypes, including autonomic nervous system dysfunction, attention deficit/hyperactivity disorder, and the personality trait of novelty seeking.                                                                    |
| DSCAM  | Down syndrome cell adhesion molecule                           |                                                                                                                                                                                                                                                                                                                                                       |
| E2F1   | E2F transcription factor 1                                     | The protein encoded by this gene is a member of the E2F family of transcription factors which plays a crucial role in the control of cell cycle and action of tumor suppressor proteins and is also a target of the transforming proteins of small DNA tumor viruses. It can mediate both cell proliferation and p53-dependent/independent apoptosis. |
| EPOR   | erythropoietin receptor                                        | This erythropoietin receptor activates Jak2 tyrosine kinase which activates different intracellular pathways including: Ras/MAP kinase, phosphatidylinositol 3-kinase and STAT transcription factors. The stimulated erythropoietin receptor appears to have a role in erythroid cell survival.                                                       |
| ESPN   | espin                                                          |                                                                                                                                                                                                                                                                                                                                                       |
| ESR1   | estrogen receptor 1                                            | This gene encodes an estrogen receptor which are essential for sexual development and reproductive function, but also play a role in other tissues such as bone.                                                                                                                                                                                      |
| FABP7  | fatty acid binding protein 7, brain                            | The protein encoded by this gene is a brain fatty acid binding protein which is thought to play roles in fatty acid uptake, transport, and metabolism.                                                                                                                                                                                                |
| GABRB3 | gamma-aminobutyric acid (GABA) A receptor, beta 3              | The encoded protein is one of at least 13 distinct subunits of a multisubunit chloride channel that serves as the receptor for gamma-aminobutyric acid, the major inhibitory transmitter of the nervous system.                                                                                                                                       |
| GABRG2 | gamma-aminobutyric acid (GABA) A receptor, gamma 2             | This gene encodes a gamma-aminobutyric acid (GABA) receptor. GABA is the major inhibitory neurotransmitter in the mammalian brain.                                                                                                                                                                                                                    |
| GAD1   | glutamate decarboxylase 1 (brain, 67kDa)                       | The enzyme encoded is responsible for catalyzing the production of gamma-aminobutyric acid from L-glutamic acid.                                                                                                                                                                                                                                      |
| GAD2   | glutamate decarboxylase 2 (pancreatic islets and brain, 65kDa) | This gene encodes one of several forms of glutamic acid decarboxylase, identified as a major autoantigen in insulin-dependent diabetes.                                                                                                                                                                                                               |
| GALP   | galanin-like peptide                                           | The encoded protein binds galanin receptors 1, 2 and 3 with the highest affinity for galanin receptor 3 and has been implicated in biological processes involving the central nervous system including hypothalamic regulation of metabolism and reproduction.                                                                                        |
| GALR3  | galanin receptor 3                                             | The neuropeptide galanin modulates a variety of physiologic processes including cognition/memory, sensory/pain processing, hormone secretion, and feeding behavior.                                                                                                                                                                                   |
| GCG    | glucagon                                                       | Glucagon, is a pancreatic hormone that counteracts the glucose-lowering action of insulin by stimulating glycogenolysis and gluconeogenesis.                                                                                                                                                                                                          |
| GDNF   | glial cell derived neurotrophic factor                         | The recombinant form of this protein was shown to promote the survival and differentiation of dopaminergic neurons in culture, and was able to prevent apoptosis of motor neurons induced by axotomy.                                                                                                                                                 |
| GHSR   | growth hormone secretagogue receptor                           | The encoded protein may play a role in energy homeostasis and regulation of body weight.                                                                                                                                                                                                                                                              |

|        |                                                                                         |                                                                                                                                                                                                                                                                           |
|--------|-----------------------------------------------------------------------------------------|---------------------------------------------------------------------------------------------------------------------------------------------------------------------------------------------------------------------------------------------------------------------------|
| GLP1R  | glucagon-like peptide 1 receptor                                                        |                                                                                                                                                                                                                                                                           |
| GLS    | glutaminase                                                                             | This is the major enzyme yielding glutamate from glutamine. Significance of the enzyme derives from its possible implication in behavior disturbances in which glutamate acts as a neurotransmitter.                                                                      |
| GNAO1  | guanine nucleotide binding protein (G protein), alpha activating activity polypeptide O |                                                                                                                                                                                                                                                                           |
| GNAT3  | guanine nucleotide binding protein, alpha transducing 3                                 |                                                                                                                                                                                                                                                                           |
| GPR37  | G protein-coupled receptor 37 (endothelin receptor type B-like)                         |                                                                                                                                                                                                                                                                           |
| GRIA2  | glutamate receptor, ionotropic, AMPA 2                                                  | Glutamate receptors are the predominant excitatory neurotransmitter receptors in the mammalian brain and are activated in a variety of normal neurophysiologic processes. This protein functions as ligand-activated cation channels.                                     |
| GRIK2  | glutamate receptor, ionotropic, kainate 2                                               | This gene product belongs to the kainate family of glutamate receptors, which are composed of four subunits and function as ligand-activated ion channels.                                                                                                                |
| GRIN2A | glutamate receptor, ionotropic, N-methyl D-aspartate 2A                                 | These receptors have been shown to be involved in long-term potentiation, an activity-dependent increase in the efficiency of synaptic transmission thought to underlie certain kinds of memory and learning.                                                             |
| GRIN2B | glutamate receptor, ionotropic, N-methyl D-aspartate 2B                                 | This NMDA receptor channel has been shown to be involved in long-term potentiation, an activity-dependent increase in the efficiency of synaptic transmission thought to underlie certain kinds of memory and learning.                                                   |
| GRM2   | glutamate receptor, metabotropic 2                                                      | Glutamatergic neurotransmission is involved in most aspects of normal brain function and can be perturbed in many neuropathologic conditions. GRM2 and GRM3 are linked to the inhibition of the cyclic AMP cascade but differ in their agonist selectivities.             |
| GRM6   | glutamate receptor, metabotropic 6                                                      | Glutamatergic neurotransmission is involved in most aspects of normal brain function and can be perturbed in many neuropathologic conditions. GRM4, GRM6, GRM7 and GRM8 are linked to the inhibition of the cyclic AMP cascade but differ in their agonist selectivities. |
| GRM7   | glutamate receptor, metabotropic 7                                                      | Glutamatergic neurotransmission is involved in most aspects of normal brain function and can be perturbed in many neuropathologic conditions. GRM4, GRM6, GRM7 and GRM8 are linked to the inhibition of the cyclic AMP cascade but differ in their agonist selectivities. |
| HCRTR2 | hypocretin (orexin) receptor 2                                                          | The protein encoded by this gene is involved in the regulation of feeding behavior. The encoded protein binds the hypothalamic neuropeptides orexin A and orexin B.                                                                                                       |
| HEXA   | hexosaminidase A (alpha polypeptide)                                                    | Hexosaminidase A is the alpha subunit of the lysosomal enzyme beta-hexosaminidase that, together with the cofactor GM2 activator protein, catalyzes the degradation of the ganglioside GM2, and other molecules containing terminal N-acetyl hexosamines.                 |
| HRH3   | histamine receptor H3                                                                   | This gene encodes one of the histamine receptors (H3) which can regulate neurotransmitter release. This receptor can also increase voltage-dependent calcium current in smooth muscles and innervates the blood vessels and the heart in cardiovascular system.           |

|        |                                                                          |                                                                                                                                                                                                                                                                                                                                                                                                                                                   |
|--------|--------------------------------------------------------------------------|---------------------------------------------------------------------------------------------------------------------------------------------------------------------------------------------------------------------------------------------------------------------------------------------------------------------------------------------------------------------------------------------------------------------------------------------------|
| HTR1A  | 5-hydroxytryptamine (serotonin) receptor 1A                              |                                                                                                                                                                                                                                                                                                                                                                                                                                                   |
| HTR2C  | 5-hydroxytryptamine (serotonin) receptor 2C                              | Serotonin (5-hydroxytryptamine, 5-HT), a neurotransmitter, elicits a wide array of physiological effects by binding to several receptor subtypes, including the 5-HT2 family of seven-transmembrane-spanning, G-protein-coupled receptors, which activate phospholipase C and D signaling pathways.                                                                                                                                               |
| HTR5A  | 5-hydroxytryptamine (serotonin) receptor 5A                              | The neurotransmitter serotonin has been implicated in a wide range of psychiatric conditions and also has vasoconstrictive and vasodilatory effects. This protein is a member of serotonin receptor family and encodes a multi-pass membrane protein that functions as a receptor for serotonin and couples to G-proteins. This protein has been shown to function in part through the regulation of intracellular Ca <sup>2+</sup> mobilization. |
| IGF1   | insulin-like growth factor 1 (somatomedin C)                             | The protein encoded by this gene is similar to insulin in function and structure and is a member of a family of proteins involved in mediating growth and development.                                                                                                                                                                                                                                                                            |
| IL1RN  | interleukin 1 receptor antagonist                                        | This protein inhibits the activities of interleukin 1, alpha (IL1A) and interleukin 1, beta (IL1B), and modulates a variety of interleukin 1 related immune and inflammatory responses.                                                                                                                                                                                                                                                           |
| JAK1   | Janus kinase 1                                                           | JAK1 is involved in the interferon-alpha/beta and -gamma signal transduction pathways. These kinases couple cytokine ligand binding to tyrosine phosphorylation of various known signaling proteins and of a unique family of transcription factors termed the signal transducers and activators of transcription, or STATs.                                                                                                                      |
| JPH1   | junctional protein 1                                                     | The protein encoded by this gene is a component of junctional complexes and is composed of a C-terminal hydrophobic segment spanning the endoplasmic/sarcoplasmic reticulum membrane and a remaining cytoplasmic domain that shows specific affinity for the plasma membrane.                                                                                                                                                                     |
| KCNAB1 | potassium voltage-gated channel, shaker-related subfamily, beta member 1 | Potassium channels' functions include regulating neurotransmitter release, heart rate, insulin secretion, neuronal excitability, epithelial electrolyte transport, smooth muscle contraction, and cell volume. This gene encodes a member of the potassium channel, voltage-gated, shaker-related subfamily.                                                                                                                                      |
| KCNIP3 | Kv channel interacting protein 3, calsenilin                             | This gene encodes a member of the family of voltage-gated potassium (Kv) channel-interacting proteins. They are integral subunit components of native Kv4 channel complexes that may regulate A-type currents, and hence neuronal excitability, in response to changes in intracellular calcium. The encoded protein also functions as a calcium-regulated transcriptional repressor, and interacts with presenilins.                             |
| KCNJ5  | potassium inwardly-rectifying channel, subfamily J, member 5             | Potassium channels are present in most mammalian cells, where they participate in a wide range of physiologic responses. The protein encoded by this gene is an integral membrane protein and inward-rectifier type potassium channel.                                                                                                                                                                                                            |
| KIT    | v-kit Hardy-Zuckerman 4 feline sarcoma viral oncogene homolog            | This gene encodes the human homolog of the proto-oncogene c-kit. This protein is a type 3 transmembrane receptor for MGF (mast cell growth factor, also known as stem cell factor).                                                                                                                                                                                                                                                               |
| KRAS   | v-Ki-ras2 Kirsten rat sarcoma viral oncogene homolog                     | This gene, a Kirsten ras oncogene, encodes a protein that is a member of the small GTPase superfamily. The transforming protein that results is implicated in various malignancies, including lung adenocarcinoma, mucinous adenoma, ductal carcinoma of the pancreas and colorectal carcinoma.                                                                                                                                                   |
| LALBA  | lactalbumin, alpha-                                                      | This gene encodes alpha-lactalbumin, a principal protein of milk.                                                                                                                                                                                                                                                                                                                                                                                 |
| LAMA2  | laminin, alpha 2                                                         | Laminin, an extracellular protein, is a major component of the basement membrane. It is thought to mediate the attachment, migration, and organization of cells into tissues during embryonic development by interacting with other extracellular matrix components.                                                                                                                                                                              |

|         |                                                                              |                                                                                                                                                                                                                                                                                                      |
|---------|------------------------------------------------------------------------------|------------------------------------------------------------------------------------------------------------------------------------------------------------------------------------------------------------------------------------------------------------------------------------------------------|
| LEPR    | leptin receptor                                                              | Leptin (LEP; MIM 164160), an adipocyte-specific hormone that regulates adipose-tissue mass through hypothalamic effects on satiety and energy expenditure, acts through the leptin receptor (LEPR).                                                                                                  |
| LHCGR   | luteinizing hormone/choriogonadotropin receptor                              | This gene encodes the receptor for both luteinizing hormone and choriogonadotropin.                                                                                                                                                                                                                  |
| LHX8    | LIM homeobox 8                                                               | Members of the LIM homeobox gene family, such as LHX8, encode transcription regulators that share common structural features. Members of the LIM homeobox gene family are required for the patterning or the specification and differentiation of different cell types during embryonic development. |
| LINGO1  | leucine rich repeat and Ig domain containing 1                               |                                                                                                                                                                                                                                                                                                      |
| MAOB    | monoamine oxidase B                                                          | This protein catalyzes the oxidative deamination of biogenic and xenobiotic amines and plays a role in the metabolism of neuroactive and vasoactive amines in the central nervous system and peripheral tissues. This protein preferentially degrades benzylamine and phenylethylamine.              |
| MAP6    | microtubule-associated protein 6                                             | This gene encodes a microtubule-associated protein. The encoded protein is a calmodulin-binding and calmodulin-regulated protein that is involved in microtubule stabilization.                                                                                                                      |
| MCHR1   | melanin-concentrating hormone receptor 1                                     | This protein binds melanin-concentrating hormone. The encoded protein can inhibit cAMP accumulation and stimulate intracellular calcium flux, and is probably involved in the neuronal regulation of food consumption.                                                                               |
| MCOLN3  | mucolipin 3                                                                  | Mucolipins constitute a family of cation channel proteins with homologs in mouse, Drosophila, and C. elegans. Mutations in the human MCOLN1 gene (MIM 605248) cause mucopolipidosis IV (MIM 262650).                                                                                                 |
| MET     | met proto-oncogene (hepatocyte growth factor receptor)                       | The proto-oncogene MET product is the hepatocyte growth factor receptor and encodes tyrosine-kinase activity.                                                                                                                                                                                        |
| MYCN    | v-myc myelocytomatosis viral related oncogene, neuroblastoma derived (avian) | This protein is located in the nucleus and must dimerize with another bHLH protein in order to bind DNA. Amplification of this gene is associated with a variety of tumors, most notably neuroblastomas.                                                                                             |
| NCDN    | neurochondrin                                                                | This gene encodes a protein, which is highly similar to a mouse protein that negatively regulates Ca/calmodulin-dependent protein kinase II phosphorylation and may be essential for spatial learning processes.                                                                                     |
| NEUROD2 | neurogenic differentiation 2                                                 | Expression of this gene can induce transcription from neuron-specific promoters, such as the GAP-43 promoter, which contain a specific DNA sequence known as an E-box. The product of this gene is thought to play a role in the determination and maintenance of neuronal cell fates.               |
| NF1     | neurofibromin 1                                                              | This gene product appears to function as a negative regulator of the ras signal transduction pathway.                                                                                                                                                                                                |
| NHLH2   | nescent helix loop helix 2                                                   |                                                                                                                                                                                                                                                                                                      |
| NKX2-1  | NK2 homeobox 1                                                               |                                                                                                                                                                                                                                                                                                      |
| NLGN3   | neuroligin 3                                                                 | This gene encodes a member of a family of neuronal cell surface proteins. Members of this family may act as splice site-specific ligands for beta-neurexins and may be involved in the formation and remodeling of central nervous system synapses.                                                  |
| NLGN4X  | neuroligin 4, X-linked                                                       | This protein may act as splice site-specific ligands for beta-neurexins and may be involved in the formation and remodeling of central nervous system synapses. The encoded protein interacts with discs, large (Drosophila) homolog 4 (DLG4).                                                       |

|        |                                                             |                                                                                                                                                                                                                                                                                       |
|--------|-------------------------------------------------------------|---------------------------------------------------------------------------------------------------------------------------------------------------------------------------------------------------------------------------------------------------------------------------------------|
| NOS1   | nitric oxide synthase 1 (neuronal)                          | Nitric oxide is a reactive free radical which mediates neurotransmission and antimicrobial and antitumoral activities. Nitric oxide is synthesized from L-arginine by nitric oxide synthases. This gene encodes a nitric oxide synthase which is highly expressed in skeletal muscle. |
| NOVA1  | neuro-oncological ventral antigen 1                         | This gene encodes a neuron-specific RNA-binding protein, a member of the Nova family of paraneoplastic disease antigens, that is recognized and inhibited by paraneoplastic antibodies.                                                                                               |
| NPAS3  | neuronal PAS domain protein 3                               |                                                                                                                                                                                                                                                                                       |
| NPY1R  | neuropeptide Y receptor Y1                                  | Neuropeptide Y exhibits a diverse range of important physiologic activities, including effects on psychomotor activity, food intake, regulation of central endocrine secretion, and potent vasoactive effects on the cardiovascular system.                                           |
| NPY2R  | neuropeptide Y receptor Y2                                  |                                                                                                                                                                                                                                                                                       |
| NR2E1  | nuclear receptor subfamily 2, group E, member 1             |                                                                                                                                                                                                                                                                                       |
| NRG1   | neuregulin 1                                                | This protein is a signaling protein that mediates cell-cell interactions and plays critical roles in the growth and development of multiple organ systems.                                                                                                                            |
| NRTN   | neurturin                                                   | Neurturin is a member of the TGF-beta subfamily, TRN. This gene signals through RET and a GPI-linked coreceptor, and promotes survival of neuronal populations.                                                                                                                       |
| NTRK2  | neurotrophic tyrosine kinase, receptor, type 2              | This kinase is a membrane-bound receptor that, upon neurotrophin binding, phosphorylates itself and members of the MAPK pathway. Signalling through this kinase leads to cell differentiation.                                                                                        |
| OBP2B  | odorant binding protein 2B                                  |                                                                                                                                                                                                                                                                                       |
| OPRK1  | opioid receptor, kappa 1                                    |                                                                                                                                                                                                                                                                                       |
| OR2H2  | olfactory receptor, family 2, subfamily H, member 2         | Olfactory receptors interact with odorant molecules in the nose, to initiate a neuronal response that triggers the perception of a smell.                                                                                                                                             |
| P2RX2  | purinergic receptor P2X, ligand-gated ion channel, 2        | The product of this gene belongs to the family of purinoceptors for ATP. This receptor functions as a ligand-gated ion channel. Binding to ATP mediates synaptic transmission between neurons and from neurons to smooth muscle.                                                      |
| PARK2  | Parkinson disease (autosomal recessive, juvenile) 2, parkin | The encoded protein is a component of a multiprotein E3 ubiquitin ligase complex that mediates the targeting of substrate proteins for proteasomal degradation.                                                                                                                       |
| PCDH15 | protocadherin 15                                            | This gene encodes an integral membrane protein that mediates calcium-dependent cell-cell adhesion. It plays an essential role in maintenance of normal retinal and cochlear function.                                                                                                 |
| PDE10A | phosphodiesterase 10A                                       | Phosphodiesterases, such as PDE10A, eliminate cAMP- and cGMP-mediated intracellular signaling by hydrolyzing the cyclic nucleotide to the corresponding nucleoside 5-prime monophosphate.                                                                                             |
| PDE1B  | phosphodiesterase 1B, calmodulin-dependent                  |                                                                                                                                                                                                                                                                                       |
| PEX13  | peroxisomal biogenesis factor 13                            | This gene encodes a peroxisomal membrane protein that binds the type 1 peroxisomal targeting signal receptor via a SH3 domain located in the cytoplasm.                                                                                                                               |
| PGR    | progesterone receptor                                       | The encoded protein mediates the physiological effects of progesterone, which plays a central role in reproductive events associated with the establishment and maintenance of pregnancy.                                                                                             |
| PLCL1  | phospholipase C-like 1                                      |                                                                                                                                                                                                                                                                                       |
| POU4F1 | POU class 4 homeobox 1                                      | POU4F1 is a class IV POU domain-containing transcription factor highly expressed in the developing sensory nervous system and in cells of the B- and T-lymphocytic lineages.                                                                                                          |

|          |                                                                                |                                                                                                                                                                                                                                                                                                                                                                                        |
|----------|--------------------------------------------------------------------------------|----------------------------------------------------------------------------------------------------------------------------------------------------------------------------------------------------------------------------------------------------------------------------------------------------------------------------------------------------------------------------------------|
| PPARGC1A | peroxisome proliferator-activated receptor gamma, coactivator 1 alpha          | This protein is a transcriptional coactivator that regulates the genes involved in energy metabolism. This protein may be also involved in controlling blood pressure, regulating cellular cholesterol homeostasis, and the development of obesity.                                                                                                                                    |
| PRKAR2B  | protein kinase, cAMP-dependent, regulatory, type II, beta                      | Knockout studies in mice suggest that this subunit may play an important role in regulating energy balance and adiposity.                                                                                                                                                                                                                                                              |
| PRKCA    | protein kinase C, alpha                                                        | This kinase plays roles in many cellular processes, such as cell adhesion, cell transformation, cell cycle checkpoint, and cell volume control. Knockout studies in mice suggest that this kinase may be a fundamental regulator of cardiac contractility and Ca(2+) handling in myocytes.                                                                                             |
| PRKCG    | protein kinase C, gamma                                                        | This kinase is expressed solely in the brain and spinal cord and its localization is restricted to neurons. It has been demonstrated that several neuronal functions, including long term potentiation (LTP) and long term depression (LTD), specifically require this kinase. Knockout studies in mice also suggest that this kinase may be involved in neuropathic pain development. |
| PRKG1    | protein kinase, cGMP-dependent, type I                                         |                                                                                                                                                                                                                                                                                                                                                                                        |
| PRLH     | prolactin releasing hormone                                                    |                                                                                                                                                                                                                                                                                                                                                                                        |
| PRLR     | prolactin receptor                                                             |                                                                                                                                                                                                                                                                                                                                                                                        |
| PTGER3   | prostaglandin E receptor 3 (subtype EP3)                                       | The functions of this protein include digestion, nervous system, kidney reabsorption, and uterine contraction activities. This receptor may also mediate adrenocorticotrophic hormone response as well as fever generation in response to exogenous and endogenous stimuli.                                                                                                            |
| PTK2     | PTK2 protein tyrosine kinase 2                                                 | Activation of this gene may be an important early step in cell growth and intracellular signal transduction pathways triggered in response to certain neural peptides or to cell interactions with the extracellular matrix.                                                                                                                                                           |
| PTN      | pleiotrophin                                                                   |                                                                                                                                                                                                                                                                                                                                                                                        |
| PTPRD    | protein tyrosine phosphatase, receptor type, D                                 | PTPs like this one are known to be signaling molecules that regulate a variety of cellular processes including cell growth, differentiation, mitotic cycle, and oncogenic transformation. This PTP may also promote neurite growth, and regulate neurons axon guidance.                                                                                                                |
| PYY      | peptide YY                                                                     |                                                                                                                                                                                                                                                                                                                                                                                        |
| RCAN1    | regulator of calcineurin 1                                                     | The protein encoded by this gene interacts with calcineurin A and inhibits calcineurin-dependent signaling pathways, possibly affecting central nervous system development.                                                                                                                                                                                                            |
| SLC18A2  | solute carrier family 18 (vesicular monoamine), member 2                       | The vesicular monoamine transporter acts to accumulate cytosolic monoamines into synaptic vesicles, using the proton gradient maintained across the synaptic vesicular membrane. Its proper function is essential to the correct activity of the monoaminergic systems that have been implicated in several human neuropsychiatric disorders.                                          |
| SLC1A2   | solute carrier family 1 (glial high affinity glutamate transporter), member 2  | The membrane-bound protein is the principal transporter that clears the excitatory neurotransmitter glutamate from the extracellular space at synapses in the central nervous system. Glutamate clearance is necessary for proper synaptic activation and to prevent neuronal damage from excessive activation of glutamate receptors.                                                 |
| SLC6A2   | solute carrier family 6 (neurotransmitter transporter, noradrenalin), member 2 | The SLC6A2 gene encodes a norepinephrine (noradrenaline) transporter, which is responsible for reuptake of norepinephrine into presynaptic nerve terminals and is a regulator of norepinephrine homeostasis.                                                                                                                                                                           |



|        |                                                                                                    |                                                                                                                                                                                                                                                                                                                                                  |
|--------|----------------------------------------------------------------------------------------------------|--------------------------------------------------------------------------------------------------------------------------------------------------------------------------------------------------------------------------------------------------------------------------------------------------------------------------------------------------|
| SOBP   | sine oculis binding protein homolog (Drosophila)                                                   |                                                                                                                                                                                                                                                                                                                                                  |
| SPTBN4 | spectrin, beta, non-erythrocytic 4                                                                 | Spectrin is an actin crosslinking and molecular scaffold protein that links the plasma membrane to the actin cytoskeleton, and functions in the determination of cell shape, arrangement of transmembrane proteins, and organization of organelles.                                                                                              |
| TACR1  | tachykinin receptor 1                                                                              | This gene encodes the receptor for the tachykinin substance P, also referred to as neurokinin 1. The encoded protein is also involved in the mediation of phosphatidylinositol metabolism of substance P.                                                                                                                                        |
| TAL2   | T-cell acute lymphocytic leukemia 2                                                                | Translocations between this gene on chromosome 9 and the T-cell receptor beta-chain locus on chromosome 7 have been associated with activation of the T-cell acute lymphocytic leukemia 2 gene and T-cell acute lymphoblastic leukemia.                                                                                                          |
| TAS2R1 | taste receptor, type 2, member 1                                                                   | This gene encodes a member of a family of candidate taste receptors that are specifically expressed by taste receptor cells of the tongue and palate epithelia, functioning as a bitter taste receptor.                                                                                                                                          |
| TAS2R4 | taste receptor, type 2, member 4                                                                   | This gene encodes a member of a family of candidate taste receptors that are specifically expressed by taste receptor cells of the tongue and palate epithelia, functioning as a bitter taste receptor.                                                                                                                                          |
| TH     | tyrosine hydroxylase                                                                               | The protein encoded by this gene is involved in the conversion of tyrosine to dopamine. It is the rate-limiting enzyme in the synthesis of catecholamines, hence plays a key role in the physiology of adrenergic neurons.                                                                                                                       |
| THRB   | thyroid hormone receptor, beta (erythroblastic leukemia viral (v-erb-a) oncogene homolog 2, avian) | The protein encoded by this gene is a nuclear hormone receptor for triiodothyronine. It is one of the several receptors for thyroid hormone, and has been shown to mediate the biological activities of thyroid hormone.                                                                                                                         |
| TRH    | thyrotropin-releasing hormone                                                                      |                                                                                                                                                                                                                                                                                                                                                  |
| TRPV1  | transient receptor potential cation channel, subfamily V, member 1                                 | The protein encoded by this gene is a receptor for capsaicin and is a non-selective cation channel that is structurally related to members of the TRP family of ion channels. This receptor is also activated by increases in temperature in the noxious range, suggesting that it functions as a transducer of painful thermal stimuli in vivo. |
| UNC13C | unc-13 homolog C (C. elegans)                                                                      |                                                                                                                                                                                                                                                                                                                                                  |
| ZIC1   | Zic family member 1 (odd-paired homolog, Drosophila)                                               | This gene encodes a transcription factor that can bind and transactivate the apolipoprotein E gene.                                                                                                                                                                                                                                              |

Behavior: Learning:  
Learning (7.85E-07)

|       |                                                |                                                                                                                                                                                     |
|-------|------------------------------------------------|-------------------------------------------------------------------------------------------------------------------------------------------------------------------------------------|
| ABI2  | abl interactor 2                               |                                                                                                                                                                                     |
| ACCN2 | amiloride-sensitive cation channel 2, neuronal | The member encoded by this gene is expressed in most if not all brain neurons, and it may be an ion channel subunit                                                                 |
| ADAM2 | ADAM metalloproteinase domain 2                | This gene has been implicated in a variety of biological processes involving cell-cell and cell-matrix interactions, including fertilization, muscle development, and neurogenesis. |
| AFF2  | AF4/FMR2 family, member 2                      |                                                                                                                                                                                     |

|         |                                                                           |                                                                                                                                                                                                                                                                                                                                                                                                                                          |
|---------|---------------------------------------------------------------------------|------------------------------------------------------------------------------------------------------------------------------------------------------------------------------------------------------------------------------------------------------------------------------------------------------------------------------------------------------------------------------------------------------------------------------------------|
| ATM     | ataxia telangiectasia mutated                                             | This protein functions as a regulator of a wide variety of downstream proteins, including tumor suppressor proteins p53 and BRCA1, checkpoint kinase CHK2, checkpoint proteins RAD17 and RAD9, and DNA repair protein NBS1. This protein and the closely related kinase ATR are thought to be master controllers of cell cycle checkpoint signaling pathways that are required for cell response to DNA damage and for genome stability. |
| ATP1A3  | ATPase, Na <sup>+</sup> /K <sup>+</sup> transporting, alpha 3 polypeptide | This Na <sup>+</sup> /K <sup>+</sup> -ATPase is responsible for establishing and maintaining the electrochemical gradients of Na and K ions across the plasma membrane. These gradients are essential for osmoregulation, for sodium-coupled transport of a variety of organic and inorganic molecules, and for electrical excitability of nerve and muscle.                                                                             |
| BACE1   | beta-site APP-cleaving enzyme 1                                           | The encoded protein, a member of the peptidase A1 protein family, is a type I integral membrane glycoprotein and aspartic protease that is found mainly in the Golgi.                                                                                                                                                                                                                                                                    |
| CACNA1C | calcium channel, voltage-dependent, L type, alpha 1C subunit              | This gene encodes an alpha-1 subunit of a voltage-dependent calcium channel. Calcium channels mediate the influx of calcium ions into the cell upon membrane polarization.                                                                                                                                                                                                                                                               |
| CHRNA7  | cholinergic receptor, nicotinic, alpha 7                                  | The protein encoded by this gene forms a homo-oligomeric channel, displays marked permeability to calcium ions and is a major component of brain nicotinic receptors that are blocked by, and highly sensitive to, alpha-bungarotoxin.                                                                                                                                                                                                   |
| CHRN2   | cholinergic receptor, nicotinic, beta 2 (neuronal)                        | The protein encoded by this gene belongs to a superfamily of ligand-gated ion channels which allow the flow of sodium and potassium across the plasma membrane in response to ligands such as acetylcholine and nicotine.                                                                                                                                                                                                                |
| CPLX2   | complexin 2                                                               | The protein product of this gene binds to the SNAP receptor complex and disrupts it, allowing transmitter release.                                                                                                                                                                                                                                                                                                                       |
| CRH     | corticotropin releasing hormone                                           | CRH is secreted by the paraventricular nucleus (PVN) of the hypothalamus in response to stress. In the placenta CRH is a marker that determines the length of gestation and the timing of parturition and delivery. CRH may also act as a trigger for parturition.                                                                                                                                                                       |
| CRHR1   | corticotropin releasing hormone receptor 1                                | The encoded protein is essential for the activation of signal transduction pathways that regulate diverse physiological processes including stress, reproduction, immune response and obesity.                                                                                                                                                                                                                                           |
| DLG4    | discs, large homolog 4 (Drosophila)                                       | This MAGUK protein may interact at postsynaptic sites to form a multimeric scaffold for the clustering of receptors, ion channels, and associated signaling proteins.                                                                                                                                                                                                                                                                    |
| DRD4    | dopamine receptor D4                                                      | This gene encodes the D4 subtype of the dopamine receptor. Mutations in this gene have been associated with various behavioral phenotypes, including autonomic nervous system dysfunction, attention deficit/hyperactivity disorder, and the personality trait of novelty seeking.                                                                                                                                                       |
| EPOR    | erythropoietin receptor                                                   | This erythropoietin receptor activates Jak2 tyrosine kinase which activates different intracellular pathways including: Ras/MAP kinase, phosphatidylinositol 3-kinase and STAT transcription factors. The stimulated erythropoietin receptor appears to have a role in erythroid cell survival.                                                                                                                                          |
| GABRB3  | gamma-aminobutyric acid (GABA) A receptor, beta 3                         | The encoded protein is one of at least 13 distinct subunits of a multisubunit chloride channel that serves as the receptor for gamma-aminobutyric acid, the major inhibitory transmitter of the nervous system.                                                                                                                                                                                                                          |
| GALR3   | galanin receptor 3                                                        | The neuropeptide galanin modulates a variety of physiologic processes including cognition/memory, sensory/pain processing, hormone secretion, and feeding behavior.                                                                                                                                                                                                                                                                      |
| GLP1R   | glucagon-like peptide 1 receptor                                          |                                                                                                                                                                                                                                                                                                                                                                                                                                          |

|         |                                                                          |                                                                                                                                                                                                                                                                                                              |
|---------|--------------------------------------------------------------------------|--------------------------------------------------------------------------------------------------------------------------------------------------------------------------------------------------------------------------------------------------------------------------------------------------------------|
| GRIN2A  | glutamate receptor, ionotropic, N-methyl D-aspartate 2A                  | These receptors have been shown to be involved in long-term potentiation, an activity-dependent increase in the efficiency of synaptic transmission thought to underlie certain kinds of memory and learning.                                                                                                |
| GRIN2B  | glutamate receptor, ionotropic, N-methyl D-aspartate 2B                  | This NMDA receptor channel has been shown to be involved in long-term potentiation, an activity-dependent increase in the efficiency of synaptic transmission thought to underlie certain kinds of memory and learning.                                                                                      |
| GRM7    | glutamate receptor, metabotropic 7                                       | Glutamatergic neurotransmission is involved in most aspects of normal brain function and can be perturbed in many neuropathologic conditions. GRM4, GRM6, GRM7 and GRM8 are linked to the inhibition of the cyclic AMP cascade but differ in their agonist selectivities.                                    |
| HRH3    | histamine receptor H3                                                    | This gene encodes one of the histamine receptors (H3) which can regulate neurotransmitter release. This receptor can also increase voltage-dependent calcium current in smooth muscles and innervates the blood vessels and the heart in cardiovascular system.                                              |
| HTR1A   | 5-hydroxytryptamine (serotonin) receptor 1A                              |                                                                                                                                                                                                                                                                                                              |
| KCNAB1  | potassium voltage-gated channel, shaker-related subfamily, beta member 1 | Potassium channels' functions include regulating neurotransmitter release, heart rate, insulin secretion, neuronal excitability, epithelial electrolyte transport, smooth muscle contraction, and cell volume. This gene encodes a member of the potassium channel, voltage-gated, shaker-related subfamily. |
| KCNJ5   | potassium inwardly-rectifying channel, subfamily J, member 5             | Potassium channels are present in most mammalian cells, where they participate in a wide range of physiologic responses. The protein encoded by this gene is an integral membrane protein and inward-rectifier type potassium channel.                                                                       |
| KCNJ5   | potassium inwardly-rectifying channel, subfamily J, member 5             | Potassium channels are present in most mammalian cells, where they participate in a wide range of physiologic responses. The protein encoded by this gene is an integral membrane protein and inward-rectifier type potassium channel.                                                                       |
| KIT     | v-kit Hardy-Zuckerman 4 feline sarcoma viral oncogene homolog            | This gene encodes the human homolog of the proto-oncogene c-kit. This protein is a type 3 transmembrane receptor for MGF (mast cell growth factor, also known as stem cell factor).                                                                                                                          |
| KRAS    | v-Ki-ras2 Kirsten rat sarcoma viral oncogene homolog                     | This gene, a Kirsten ras oncogene, encodes a protein that is a member of the small GTPase superfamily. The transforming protein that results is implicated in various malignancies, including lung adenocarcinoma, mucinous adenoma, ductal carcinoma of the pancreas and colorectal carcinoma.              |
| LHX8    | LIM homeobox 8                                                           | Members of the LIM homeobox gene family, such as LHX8, encode transcription regulators that share common structural features. Members of the LIM homeobox gene family are required for the patterning or the specification and differentiation of different cell types during embryonic development.         |
| NCDN    | neurochondrin                                                            | This gene encodes a protein, which is highly similar to a mouse protein that negatively regulates Ca/calmodulin-dependent protein kinase II phosphorylation and may be essential for spatial learning processes.                                                                                             |
| NEUROD2 | neurogenic differentiation 2                                             | Expression of this gene can induce transcription from neuron-specific promoters, such as the GAP-43 promoter, which contain a specific DNA sequence known as an E-box. The product of this gene is thought to play a role in the determination and maintenance of neuronal cell fates.                       |
| NF1     | neurofibromin 1                                                          | This gene product appears to function as a negative regulator of the ras signal transduction pathway.                                                                                                                                                                                                        |
| NLGN3   | neuroligin 3                                                             | This gene encodes a member of a family of neuronal cell surface proteins. Members of this family may act as splice site-specific ligands for beta-neurexins and may be involved in the formation and remodeling of central nervous system synapses.                                                          |

|         |                                                             |                                                                                                                                                                                                                                                                                                                                                                                        |
|---------|-------------------------------------------------------------|----------------------------------------------------------------------------------------------------------------------------------------------------------------------------------------------------------------------------------------------------------------------------------------------------------------------------------------------------------------------------------------|
| NRG1    | neuregulin 1                                                | This protein is a signaling protein that mediates cell-cell interactions and plays critical roles in the growth and development of multiple organ systems.                                                                                                                                                                                                                             |
| NTRK2   | neurotrophic tyrosine kinase, receptor, type 2              | This kinase is a membrane-bound receptor that, upon neurotrophin binding, phosphorylates itself and members of the MAPK pathway. Signalling through this kinase leads to cell differentiation.                                                                                                                                                                                         |
| PARK2   | Parkinson disease (autosomal recessive, juvenile) 2, parkin | The encoded protein is a component of a multiprotein E3 ubiquitin ligase complex that mediates the targeting of substrate proteins for proteasomal degradation.                                                                                                                                                                                                                        |
| PDE1B   | phosphodiesterase 1B, calmodulin-dependent                  |                                                                                                                                                                                                                                                                                                                                                                                        |
| PRKAR2B | protein kinase, cAMP-dependent, regulatory, type II, beta   | Knockout studies in mice suggest that this subunit may play an important role in regulating energy balance and adiposity.                                                                                                                                                                                                                                                              |
| PRKCA   | protein kinase C, alpha                                     | This kinase plays roles in many cellular processes, such as cell adhesion, cell transformation, cell cycle checkpoint, and cell volume control. Knockout studies in mice suggest that this kinase may be a fundamental regulator of cardiac contractility and Ca(2+) handling in myocytes.                                                                                             |
| PRKCG   | protein kinase C, gamma                                     | This kinase is expressed solely in the brain and spinal cord and its localization is restricted to neurons. It has been demonstrated that several neuronal functions, including long term potentiation (LTP) and long term depression (LTD), specifically require this kinase. Knockout studies in mice also suggest that this kinase may be involved in neuropathic pain development. |
| PTN     | pleiotrophin                                                |                                                                                                                                                                                                                                                                                                                                                                                        |
| PTPRD   | protein tyrosine phosphatase, receptor type, D              | PTPs like this one are known to be signaling molecules that regulate a variety of cellular processes including cell growth, differentiation, mitotic cycle, and oncogenic transformation. This PTP may also promote neurite growth, and regulate neurons axon guidance.                                                                                                                |
| TH      | tyrosine hydroxylase                                        | The protein encoded by this gene is involved in the conversion of tyrosine to dopamine. It is the rate-limiting enzyme in the synthesis of catecholamines, hence plays a key role in the physiology of adrenergic neurons.                                                                                                                                                             |
| UNC13C  | unc-13 homolog C (C. elegans)                               |                                                                                                                                                                                                                                                                                                                                                                                        |

---

Behavior: Cognition:  
Cognition (1.50E-06)

|       |                                                |                                                                                                                                                                                                                                                                                                                                                                                                                                          |
|-------|------------------------------------------------|------------------------------------------------------------------------------------------------------------------------------------------------------------------------------------------------------------------------------------------------------------------------------------------------------------------------------------------------------------------------------------------------------------------------------------------|
| ABI2  | abl interactor 2                               |                                                                                                                                                                                                                                                                                                                                                                                                                                          |
| ACCN2 | amiloride-sensitive cation channel 2, neuronal | The member encoded by this gene is expressed in most if not all brain neurons, and it may be an ion channel subunit                                                                                                                                                                                                                                                                                                                      |
| ADAM2 | ADAM metalloproteinase domain 2                | This gene has been implicated in a variety of biological processes involving cell-cell and cell-matrix interactions, including fertilization, muscle development, and neurogenesis.                                                                                                                                                                                                                                                      |
| AFF2  | AF4/FMR2 family, member 2                      |                                                                                                                                                                                                                                                                                                                                                                                                                                          |
| ATM   | ataxia telangiectasia mutated                  | This protein functions as a regulator of a wide variety of downstream proteins, including tumor suppressor proteins p53 and BRCA1, checkpoint kinase CHK2, checkpoint proteins RAD17 and RAD9, and DNA repair protein NBS1. This protein and the closely related kinase ATR are thought to be master controllers of cell cycle checkpoint signaling pathways that are required for cell response to DNA damage and for genome stability. |

|         |                                                                           |                                                                                                                                                                                                                                                                                                                                                              |
|---------|---------------------------------------------------------------------------|--------------------------------------------------------------------------------------------------------------------------------------------------------------------------------------------------------------------------------------------------------------------------------------------------------------------------------------------------------------|
| ATP1A3  | ATPase, Na <sup>+</sup> /K <sup>+</sup> transporting, alpha 3 polypeptide | This Na <sup>+</sup> /K <sup>+</sup> -ATPase is responsible for establishing and maintaining the electrochemical gradients of Na and K ions across the plasma membrane. These gradients are essential for osmoregulation, for sodium-coupled transport of a variety of organic and inorganic molecules, and for electrical excitability of nerve and muscle. |
| BACE1   | beta-site APP-cleaving enzyme 1                                           | The encoded protein, a member of the peptidase A1 protein family, is a type I integral membrane glycoprotein and aspartic protease that is found mainly in the Golgi.                                                                                                                                                                                        |
| CACNA1C | calcium channel, voltage-dependent, L type, alpha 1C subunit              | This gene encodes an alpha-1 subunit of a voltage-dependent calcium channel. Calcium channels mediate the influx of calcium ions into the cell upon membrane polarization.                                                                                                                                                                                   |
| CHD7    | chromodomain helicase DNA binding protein 7                               | This gene encodes a protein that contains several helicase family domains.                                                                                                                                                                                                                                                                                   |
| CHL1    | cell adhesion molecule with homology to L1CAM (close homolog of L1)       | The protein encoded by this gene is a neural recognition molecule that may be involved in signal transduction pathways.                                                                                                                                                                                                                                      |
| CHRNA7  | cholinergic receptor, nicotinic, alpha 7                                  | The protein encoded by this gene forms a homo-oligomeric channel, displays marked permeability to calcium ions and is a major component of brain nicotinic receptors that are blocked by, and highly sensitive to, alpha-bungarotoxin.                                                                                                                       |
| CHRN2   | cholinergic receptor, nicotinic, beta 2 (neuronal)                        | The protein encoded by this gene belongs to a superfamily of ligand-gated ion channels which allow the flow of sodium and potassium across the plasma membrane in response to ligands such as acetylcholine and nicotine.                                                                                                                                    |
| CPLX2   | complexin 2                                                               | The protein product of this gene binds to the SNAP receptor complex and disrupts it, allowing transmitter release.                                                                                                                                                                                                                                           |
| CRH     | corticotropin releasing hormone                                           | CRH is secreted by the paraventricular nucleus (PVN) of the hypothalamus in response to stress. In the placenta CRH is a marker that determines the length of gestation and the timing of parturition and delivery. CRH may also act as a trigger for parturition.                                                                                           |
| CRHR1   | corticotropin releasing hormone receptor 1                                | The encoded protein is essential for the activation of signal transduction pathways that regulate diverse physiological processes including stress, reproduction, immune response and obesity.                                                                                                                                                               |
| DLG4    | discs, large homolog 4 (Drosophila)                                       | This MAGUK protein may interact at postsynaptic sites to form a multimeric scaffold for the clustering of receptors, ion channels, and associated signaling proteins.                                                                                                                                                                                        |
| DRD4    | dopamine receptor D4                                                      | This gene encodes the D4 subtype of the dopamine receptor. Mutations in this gene have been associated with various behavioral phenotypes, including autonomic nervous system dysfunction, attention deficit/hyperactivity disorder, and the personality trait of novelty seeking.                                                                           |
| EPOR    | erythropoietin receptor                                                   | This erythropoietin receptor activates Jak2 tyrosine kinase which activates different intracellular pathways including: Ras/MAP kinase, phosphatidylinositol 3-kinase and STAT transcription factors. The stimulated erythropoietin receptor appears to have a role in erythroid cell survival.                                                              |
| GABRB3  | gamma-aminobutyric acid (GABA) A receptor, beta 3                         | The encoded protein is one of at least 13 distinct subunits of a multisubunit chloride channel that serves as the receptor for gamma-aminobutyric acid, the major inhibitory transmitter of the nervous system.                                                                                                                                              |
| GALR3   | galanin receptor 3                                                        | The neuropeptide galanin modulates a variety of physiologic processes including cognition/memory, sensory/pain processing, hormone secretion, and feeding behavior.                                                                                                                                                                                          |
| GLP1R   | glucagon-like peptide 1 receptor                                          |                                                                                                                                                                                                                                                                                                                                                              |

|         |                                                                          |                                                                                                                                                                                                                                                                                                                             |
|---------|--------------------------------------------------------------------------|-----------------------------------------------------------------------------------------------------------------------------------------------------------------------------------------------------------------------------------------------------------------------------------------------------------------------------|
| GRIN2A  | glutamate receptor, ionotropic, N-methyl D-aspartate 2A                  | These receptors have been shown to be involved in long-term potentiation, an activity-dependent increase in the efficiency of synaptic transmission thought to underlie certain kinds of memory and learning.                                                                                                               |
| GRIN2B  | glutamate receptor, ionotropic, N-methyl D-aspartate 2B                  | This NMDA receptor channel has been shown to be involved in long-term potentiation, an activity-dependent increase in the efficiency of synaptic transmission thought to underlie certain kinds of memory and learning.                                                                                                     |
| GRM7    | glutamate receptor, metabotropic 7                                       | Glutamatergic neurotransmission is involved in most aspects of normal brain function and can be perturbed in many neuropathologic conditions. GRM4, GRM6, GRM7 and GRM8 are linked to the inhibition of the cyclic AMP cascade but differ in their agonist selectivities.                                                   |
| HRH3    | histamine receptor H3                                                    | This gene encodes one of the histamine receptors (H3) which can regulate neurotransmitter release. This receptor can also increase voltage-dependent calcium current in smooth muscles and innervates the blood vessels and the heart in cardiovascular system.                                                             |
| HTR4    | 5-hydroxytryptamine (serotonin) receptor 4                               | This gene is a member of the family of serotonin receptors, which stimulate cAMP production in response to serotonin (5-hydroxytryptamine). The gene product is a glycosylated transmembrane protein that functions in both the peripheral and central nervous system to modulate the release of various neurotransmitters. |
| HTR1A   | 5-hydroxytryptamine (serotonin) receptor 1A                              |                                                                                                                                                                                                                                                                                                                             |
| KCNAB1  | potassium voltage-gated channel, shaker-related subfamily, beta member 1 | Potassium channels' functions include regulating neurotransmitter release, heart rate, insulin secretion, neuronal excitability, epithelial electrolyte transport, smooth muscle contraction, and cell volume. This gene encodes a member of the potassium channel, voltage-gated, shaker-related subfamily.                |
| KCNJ5   | potassium inwardly-rectifying channel, subfamily J, member 5             | Potassium channels are present in most mammalian cells, where they participate in a wide range of physiologic responses. The protein encoded by this gene is an integral membrane protein and inward-rectifier type potassium channel.                                                                                      |
| KIT     | v-kit Hardy-Zuckerman 4 feline sarcoma viral oncogene homolog            | This gene encodes the human homolog of the proto-oncogene c-kit. This protein is a type 3 transmembrane receptor for MGF (mast cell growth factor, also known as stem cell factor).                                                                                                                                         |
| KRAS    | v-Ki-ras2 Kirsten rat sarcoma viral oncogene homolog                     | This gene, a Kirsten ras oncogene, encodes a protein that is a member of the small GTPase superfamily. The transforming protein that results is implicated in various malignancies, including lung adenocarcinoma, mucinous adenoma, ductal carcinoma of the pancreas and colorectal carcinoma.                             |
| LHX8    | LIM homeobox 8                                                           | Members of the LIM homeobox gene family, such as LHX8, encode transcription regulators that share common structural features. Members of the LIM homeobox gene family are required for the patterning or the specification and differentiation of different cell types during embryonic development.                        |
| MAPT    | microtubule-associated protein tau                                       | MAPT transcripts are differentially expressed in the nervous system, depending on stage of neuronal maturation and neuron type.                                                                                                                                                                                             |
| NCDN    | neurochondrin                                                            | This gene encodes a protein, which is highly similar to a mouse protein that negatively regulates Ca/calmodulin-dependent protein kinase II phosphorylation and may be essential for spatial learning processes.                                                                                                            |
| NEUROD2 | neurogenic differentiation 2                                             | Expression of this gene can induce transcription from neuron-specific promoters, such as the GAP-43 promoter, which contain a specific DNA sequence known as an E-box. The product of this gene is thought to play a role in the determination and maintenance of neuronal cell fates.                                      |
| NF1     | neurofibromin 1                                                          | This gene product appears to function as a negative regulator of the ras signal transduction pathway.                                                                                                                                                                                                                       |

|         |                                                             |                                                                                                                                                                                                                                                                                                                                                                                        |
|---------|-------------------------------------------------------------|----------------------------------------------------------------------------------------------------------------------------------------------------------------------------------------------------------------------------------------------------------------------------------------------------------------------------------------------------------------------------------------|
| NLGN3   | neuroligin 3                                                | This gene encodes a member of a family of neuronal cell surface proteins. Members of this family may act as splice site-specific ligands for beta-neurexins and may be involved in the formation and remodeling of central nervous system synapses.                                                                                                                                    |
| NRG1    | neuregulin 1                                                | This protein is a signaling protein that mediates cell-cell interactions and plays critical roles in the growth and development of multiple organ systems.                                                                                                                                                                                                                             |
| NTRK2   | neurotrophic tyrosine kinase, receptor, type 2              | This kinase is a membrane-bound receptor that, upon neurotrophin binding, phosphorylates itself and members of the MAPK pathway. Signalling through this kinase leads to cell differentiation.                                                                                                                                                                                         |
| PARK2   | Parkinson disease (autosomal recessive, juvenile) 2, parkin | The encoded protein is a component of a multiprotein E3 ubiquitin ligase complex that mediates the targeting of substrate proteins for proteasomal degradation.                                                                                                                                                                                                                        |
| PDE1B   | phosphodiesterase 1B, calmodulin-dependent                  |                                                                                                                                                                                                                                                                                                                                                                                        |
| PRKAR2B | protein kinase, cAMP-dependent, regulatory, type II, beta   | Knockout studies in mice suggest that this subunit may play an important role in regulating energy balance and adiposity.                                                                                                                                                                                                                                                              |
| PRKCA   | protein kinase C, alpha                                     | This kinase plays roles in many cellular processes, such as cell adhesion, cell transformation, cell cycle checkpoint, and cell volume control. Knockout studies in mice suggest that this kinase may be a fundamental regulator of cardiac contractility and Ca(2+) handling in myocytes.                                                                                             |
| PRKCG   | protein kinase C, gamma                                     | This kinase is expressed solely in the brain and spinal cord and its localization is restricted to neurons. It has been demonstrated that several neuronal functions, including long term potentiation (LTP) and long term depression (LTD), specifically require this kinase. Knockout studies in mice also suggest that this kinase may be involved in neuropathic pain development. |
| PTN     | pleiotrophin                                                |                                                                                                                                                                                                                                                                                                                                                                                        |
| PTPRD   | protein tyrosine phosphatase, receptor type, D              | PTPs like this one are known to be signaling molecules that regulate a variety of cellular processes including cell growth, differentiation, mitotic cycle, and oncogenic transformation. This PTP may also promote neurite growth, and regulate neurons axon guidance.                                                                                                                |
| TH      | tyrosine hydroxylase                                        | The protein encoded by this gene is involved in the conversion of tyrosine to dopamine. It is the rate-limiting enzyme in the synthesis of catecholamines, hence plays a key role in the physiology of adrenergic neurons.                                                                                                                                                             |
| UNC13C  | unc-13 homolog C (C. elegans)                               |                                                                                                                                                                                                                                                                                                                                                                                        |

Behavior: Feeding:  
Feeding (1.23E-05),  
Feeding of Organism  
(2.02E-05)

|       |                                 |                                                                                                                                                                                                                                                                         |
|-------|---------------------------------|-------------------------------------------------------------------------------------------------------------------------------------------------------------------------------------------------------------------------------------------------------------------------|
| CCKAR | cholecystokinin A receptor      | This receptor is a major physiologic mediator of pancreatic enzyme secretion and smooth muscle contraction of the gallbladder and stomach. In the central and peripheral nervous system this receptor regulates satiety and the release of beta-endorphin and dopamine. |
| CNR1  | cannabinoid receptor 1 (brain)  | This gene encodes one of two cannabinoid receptors, which have been found to be involved in the cannabinoid-induced CNS effects (including alterations in mood and cognition) experienced by users of marijuana.                                                        |
| CRH   | corticotropin releasing hormone | CRH is secreted by the paraventricular nucleus (PVN) of the hypothalamus in response to stress. In the placenta CRH is a marker that determines the length of gestation and the timing of parturition and delivery. CRH may also act as a trigger for parturition.      |

|        |                                                         |                                                                                                                                                                                                                                                                                                                              |
|--------|---------------------------------------------------------|------------------------------------------------------------------------------------------------------------------------------------------------------------------------------------------------------------------------------------------------------------------------------------------------------------------------------|
| CRHR1  | corticotropin releasing hormone receptor 1              | The encoded protein is essential for the activation of signal transduction pathways that regulate diverse physiological processes including stress, reproduction, immune response and obesity.                                                                                                                               |
| DMBX1  | diencephalon/mesencephalon homeobox 1                   | The encoded protein acts as a transcription factor and may play a role in brain and sensory organ development.                                                                                                                                                                                                               |
| GALP   | galanin-like peptide                                    | The encoded protein binds galanin receptors 1, 2 and 3 with the highest affinity for galanin receptor 3 and has been implicated in biological processes involving the central nervous system including hypothalamic regulation of metabolism and reproduction.                                                               |
| GALR3  | galanin receptor 3                                      | The neuropeptide galanin modulates a variety of physiologic processes including cognition/memory, sensory/pain processing, hormone secretion, and feeding behavior.                                                                                                                                                          |
| GCG    | glucagon                                                | Glucagon, is a pancreatic hormone that counteracts the glucose-lowering action of insulin by stimulating glycogenolysis and gluconeogenesis.                                                                                                                                                                                 |
| GHSR   | growth hormone secretagogue receptor                    | The encoded protein may play a role in energy homeostasis and regulation of body weight.                                                                                                                                                                                                                                     |
| GLP1R  | glucagon-like peptide 1 receptor                        |                                                                                                                                                                                                                                                                                                                              |
| GRIN2B | glutamate receptor, ionotropic, N-methyl D-aspartate 2B | This NMDA receptor channel has been shown to be involved in long-term potentiation, an activity-dependent increase in the efficiency of synaptic transmission thought to underlie certain kinds of memory and learning.                                                                                                      |
| HCRTR2 | hypocretin (orexin) receptor 2                          | The protein encoded by this gene is involved in the regulation of feeding behavior. The encoded protein binds the hypothalamic neuropeptides orexin A and orexin B.                                                                                                                                                          |
| HRH3   | histamine receptor H3                                   | This gene encodes one of the histamine receptors (H3) which can regulate neurotransmitter release. This receptor can also increase voltage-dependent calcium current in smooth muscles and innervates the blood vessels and the heart in cardiovascular system.                                                              |
| HTR2C  | 5-hydroxytryptamine (serotonin) receptor 2C             | Serotonin (5-hydroxytryptamine, 5-HT), a neurotransmitter, elicits a wide array of physiological effects by binding to several receptor subtypes, including the 5-HT2 family of seven-transmembrane-spanning, G-protein-coupled receptors, which activate phospholipase C and D signaling pathways.                          |
| IL1RN  | interleukin 1 receptor antagonist                       | This protein inhibits the activities of interleukin 1, alpha (IL1A) and interleukin 1, beta (IL1B), and modulates a variety of interleukin 1 related immune and inflammatory responses.                                                                                                                                      |
| JAK1   | Janus kinase 1                                          | JAK1 is involved in the interferon-alpha/beta and -gamma signal transduction pathways. These kinases couple cytokine ligand binding to tyrosine phosphorylation of various known signaling proteins and of a unique family of transcription factors termed the signal transducers and activators of transcription, or STATs. |
| JPH1   | junctophilin 1                                          | The protein encoded by this gene is a component of junctional complexes and is composed of a C-terminal hydrophobic segment spanning the endoplasmic/sarcoplasmic reticulum membrane and a remaining cytoplasmic domain that shows specific affinity for the plasma membrane.                                                |
| LALBA  | lactalbumin, alpha-                                     | This gene encodes alpha-lactalbumin, a principal protein of milk.                                                                                                                                                                                                                                                            |
| LEPR   | leptin receptor                                         | Leptin (LEP; MIM 164160), an adipocyte-specific hormone that regulates adipose-tissue mass through hypothalamic effects on satiety and energy expenditure, acts through the leptin receptor (LEPR).                                                                                                                          |
| MCHR1  | melanin-concentrating hormone receptor 1                | This protein binds melanin-concentrating hormone. The encoded protein can inhibit cAMP accumulation and stimulate intracellular calcium flux, and is probably involved in the neuronal regulation of food consumption.                                                                                                       |
| NKX2-1 | NK2 homeobox 1                                          |                                                                                                                                                                                                                                                                                                                              |



|         |                                                          |                                                                                                                                                                                                                                                                                                                                               |
|---------|----------------------------------------------------------|-----------------------------------------------------------------------------------------------------------------------------------------------------------------------------------------------------------------------------------------------------------------------------------------------------------------------------------------------|
| NPY1R   | neuropeptide Y receptor Y1                               | Neuropeptide Y exhibits a diverse range of important physiologic activities, including effects on psychomotor activity, food intake, regulation of central endocrine secretion, and potent vasoactive effects on the cardiovascular system.                                                                                                   |
| NPY2R   | neuropeptide Y receptor Y2                               |                                                                                                                                                                                                                                                                                                                                               |
| NTRK2   | neurotrophic tyrosine kinase, receptor, type 2           | This kinase is a membrane-bound receptor that, upon neurotrophin binding, phosphorylates itself and members of the MAPK pathway. Signalling through this kinase leads to cell differentiation.                                                                                                                                                |
| OPRK1   | opioid receptor, kappa 1                                 |                                                                                                                                                                                                                                                                                                                                               |
| PEX13   | peroxisomal biogenesis factor 13                         | This gene encodes a peroxisomal membrane protein that binds the type 1 peroxisomal targeting signal receptor via a SH3 domain located in the cytoplasm.                                                                                                                                                                                       |
| POU4F1  | POU class 4 homeobox 1                                   | POU4F1 is a class IV POU domain-containing transcription factor highly expressed in the developing sensory nervous system and in cells of the B- and T-lymphocytic lineages.                                                                                                                                                                  |
| PRLH    | prolactin releasing hormone                              |                                                                                                                                                                                                                                                                                                                                               |
| PTGER3  | prostaglandin E receptor 3 (subtype EP3)                 | The functions of this protein include digestion, nervous system, kidney reabsorption, and uterine contraction activities. This receptor may also mediate adrenocorticotrophic hormone response as well as fever generation in response to exogenous and endogenous stimuli.                                                                   |
| PTK2    | PTK2 protein tyrosine kinase 2                           | Activation of this gene may be an important early step in cell growth and intracellular signal transduction pathways triggered in response to certain neural peptides or to cell interactions with the extracellular matrix.                                                                                                                  |
| PYY     | peptide YY                                               |                                                                                                                                                                                                                                                                                                                                               |
| SLC18A2 | solute carrier family 18 (vesicular monoamine), member 2 | The vesicular monoamine transporter acts to accumulate cytosolic monoamines into synaptic vesicles, using the proton gradient maintained across the synaptic vesicular membrane. Its proper function is essential to the correct activity of the monoaminergic systems that have been implicated in several human neuropsychiatric disorders. |
| TH      | tyrosine hydroxylase                                     | The protein encoded by this gene is involved in the conversion of tyrosine to dopamine. It is the rate-limiting enzyme in the synthesis of catecholamines, hence plays a key role in the physiology of adrenergic neurons.                                                                                                                    |
| TRH     | thyrotropin-releasing hormone                            |                                                                                                                                                                                                                                                                                                                                               |

---

Behavior: Locomotion:  
Locomotion (1.86E-05)

|        |                                                                           |                                                                                                                                                                                                                                                                                                                                                              |
|--------|---------------------------------------------------------------------------|--------------------------------------------------------------------------------------------------------------------------------------------------------------------------------------------------------------------------------------------------------------------------------------------------------------------------------------------------------------|
| ADCY1  | adenylate cyclase 1 (brain)                                               | This gene encodes a form of adenylyl cyclase expressed in brain.                                                                                                                                                                                                                                                                                             |
| ADCY5  | adenylate cyclase 5                                                       | ADCY5 belongs to the adenylyl cyclase (EC 4.6.1.1) family of enzymes responsible for the synthesis of cAMP.                                                                                                                                                                                                                                                  |
| ALS2   | amyotrophic lateral sclerosis 2 (juvenile)                                | The protein functions as a guanine nucleotide exchange factor for the small GTPase RAB5.                                                                                                                                                                                                                                                                     |
| AR     | androgen receptor                                                         | This protein functions as a steroid-hormone activated transcription factor.                                                                                                                                                                                                                                                                                  |
| ATP1A3 | ATPase, Na <sup>+</sup> /K <sup>+</sup> transporting, alpha 3 polypeptide | This Na <sup>+</sup> /K <sup>+</sup> -ATPase is responsible for establishing and maintaining the electrochemical gradients of Na and K ions across the plasma membrane. These gradients are essential for osmoregulation, for sodium-coupled transport of a variety of organic and inorganic molecules, and for electrical excitability of nerve and muscle. |

|         |                                                                               |                                                                                                                                                                                                                                                                                                                                                                                                                                                   |
|---------|-------------------------------------------------------------------------------|---------------------------------------------------------------------------------------------------------------------------------------------------------------------------------------------------------------------------------------------------------------------------------------------------------------------------------------------------------------------------------------------------------------------------------------------------|
| ATP2B2  | ATPase, Ca <sup>++</sup> transporting, plasma membrane 2                      | The protein encoded by this gene removes bivalent calcium ions from eukaryotic cells against very large concentration gradients and plays a critical role in intracellular calcium homeostasis. The expression of different isoforms and splice variants is regulated in a developmental, tissue- and cell type-specific manner, suggesting that these pumps are functionally adapted to the physiological needs of particular cells and tissues. |
| CACNA1C | calcium channel, voltage-dependent, L type, alpha 1C subunit                  | This gene encodes an alpha-1 subunit of a voltage-dependent calcium channel. Calcium channels mediate the influx of calcium ions into the cell upon membrane polarization.                                                                                                                                                                                                                                                                        |
| CELSR1  | cadherin, EGF LAG seven-pass G-type receptor 1 (flamingo homolog, Drosophila) | This particular member is a developmentally regulated, neural-specific gene which plays an unspecified role in early embryogenesis.                                                                                                                                                                                                                                                                                                               |
| CHD7    | chromodomain helicase DNA binding protein 7                                   | This gene encodes a protein that contains several helicase family domains.                                                                                                                                                                                                                                                                                                                                                                        |
| CHL1    | cell adhesion molecule with homology to L1CAM (close homolog of L1)           | The protein encoded by this gene is a neural recognition molecule that may be involved in signal transduction pathways.                                                                                                                                                                                                                                                                                                                           |
| CHRM1   | cholinergic receptor, muscarinic 1                                            | The muscarinic cholinergic receptor 1 is involved in mediation of vagally-induced bronchoconstriction and in the acid secretion of the gastrointestinal tract.                                                                                                                                                                                                                                                                                    |
| CHRN2   | cholinergic receptor, nicotinic, beta 2 (neuronal)                            | The protein encoded by this gene belongs to a superfamily of ligand-gated ion channels which allow the flow of sodium and potassium across the plasma membrane in response to ligands such as acetylcholine and nicotine.                                                                                                                                                                                                                         |
| CLN6    | ceroid-lipofuscinosis, neuronal 6, late infantile, variant                    | This gene is one of eight which have been associated with neuronal ceroid lipofuscinoses (NCL). The genes responsible likely encode proteins involved in the degradation of post-translationally modified proteins in lysosomes.                                                                                                                                                                                                                  |
| CNR1    | cannabinoid receptor 1 (brain)                                                | This gene encodes one of two cannabinoid receptors, which have been found to be involved in the cannabinoid-induced CNS effects (including alterations in mood and cognition) experienced by users of marijuana.                                                                                                                                                                                                                                  |
| CRH     | corticotropin releasing hormone                                               | CRH is secreted by the paraventricular nucleus (PVN) of the hypothalamus in response to stress. In the placenta CRH is a marker that determines the length of gestation and the timing of parturition and delivery. CRH may also act as a trigger for parturition.                                                                                                                                                                                |
| CRHR1   | corticotropin releasing hormone receptor 1                                    | The encoded protein is essential for the activation of signal transduction pathways that regulate diverse physiological processes including stress, reproduction, immune response and obesity.                                                                                                                                                                                                                                                    |
| CSTB    | cystatin B (stefin B)                                                         | This gene encodes a stefin that functions as an intracellular thiol protease inhibitor. The protein is able to form a dimer stabilized by noncovalent forces, inhibiting papain and cathepsins I, h and b. The protein is thought to play a role in protecting against the proteases leaking from lysosomes.                                                                                                                                      |
| DLG4    | discs, large homolog 4 (Drosophila)                                           | This MAGUK protein may interact at postsynaptic sites to form a multimeric scaffold for the clustering of receptors, ion channels, and associated signaling proteins.                                                                                                                                                                                                                                                                             |
| DMBX1   | diencephalon/mesencephalon homeobox 1                                         | The encoded protein acts as a transcription factor and may play a role in brain and sensory organ development.                                                                                                                                                                                                                                                                                                                                    |
| DOCK1   | dedicator of cytokinesis 1                                                    | This gene product binds to the SH3 domain of CRK protein. It may regulate cell surface extension and may have a role in the cell surface extension of an engulfing cell around a dying cell during apoptosis.                                                                                                                                                                                                                                     |

|        |                                                                                         |                                                                                                                                                                                                                                                                                                                                                                     |
|--------|-----------------------------------------------------------------------------------------|---------------------------------------------------------------------------------------------------------------------------------------------------------------------------------------------------------------------------------------------------------------------------------------------------------------------------------------------------------------------|
| DRD4   | dopamine receptor D4                                                                    | This gene encodes the D4 subtype of the dopamine receptor. Mutations in this gene have been associated with various behavioral phenotypes, including autonomic nervous system dysfunction, attention deficit/hyperactivity disorder, and the personality trait of novelty seeking.                                                                                  |
| DSCAM  | Down syndrome cell adhesion molecule                                                    |                                                                                                                                                                                                                                                                                                                                                                     |
| EFNB3  | ephrin-B3                                                                               | EFNB3, a member of the ephrin gene family, is important in brain development as well as in its maintenance. It may play a pivotal role in forebrain function. The EPH and EPH-related receptors comprise the largest subfamily of receptor protein-tyrosine kinases and have been implicated in mediating developmental events, particularly in the nervous system. |
| ESPN   | espin                                                                                   |                                                                                                                                                                                                                                                                                                                                                                     |
| GABRB3 | gamma-aminobutyric acid (GABA) A receptor, beta 3                                       | The encoded protein is one of at least 13 distinct subunits of a multisubunit chloride channel that serves as the receptor for gamma-aminobutyric acid, the major inhibitory transmitter of the nervous system.                                                                                                                                                     |
| GAD2   | glutamate decarboxylase 2 (pancreatic islets and brain, 65kDa)                          | This gene encodes one of several forms of glutamic acid decarboxylase, identified as a major autoantigen in insulin-dependent diabetes.                                                                                                                                                                                                                             |
| GDNF   | glial cell derived neurotrophic factor                                                  | The recombinant form of this protein was shown to promote the survival and differentiation of dopaminergic neurons in culture, and was able to prevent apoptosis of motor neurons induced by axotomy.                                                                                                                                                               |
| GLP1R  | glucagon-like peptide 1 receptor                                                        |                                                                                                                                                                                                                                                                                                                                                                     |
| GNAO1  | guanine nucleotide binding protein (G protein), alpha activating activity polypeptide O |                                                                                                                                                                                                                                                                                                                                                                     |
| GPR37  | G protein-coupled receptor 37 (endothelin receptor type B-like)                         |                                                                                                                                                                                                                                                                                                                                                                     |
| GRIN2A | glutamate receptor, ionotropic, N-methyl D-aspartate 2A                                 | These receptors have been shown to be involved in long-term potentiation, an activity-dependent increase in the efficiency of synaptic transmission thought to underlie certain kinds of memory and learning.                                                                                                                                                       |
| GRM2   | glutamate receptor, metabotropic 2                                                      | Glutamatergic neurotransmission is involved in most aspects of normal brain function and can be perturbed in many neuropathologic conditions. GRM2 and GRM3 are linked to the inhibition of the cyclic AMP cascade but differ in their agonist selectivities.                                                                                                       |
| GRM6   | glutamate receptor, metabotropic 6                                                      | Glutamatergic neurotransmission is involved in most aspects of normal brain function and can be perturbed in many neuropathologic conditions. GRM4, GRM6, GRM7 and GRM8 are linked to the inhibition of the cyclic AMP cascade but differ in their agonist selectivities.                                                                                           |
| HEXA   | hexosaminidase A (alpha polypeptide)                                                    | Hexosaminidase A is the alpha subunit of the lysosomal enzyme beta-hexosaminidase that, together with the cofactor GM2 activator protein, catalyzes the degradation of the ganglioside GM2, and other molecules containing terminal N-acetyl hexosamines.                                                                                                           |
| HIPK2  | homeodomain interacting protein kinase 2                                                | HIPK2 is a conserved serine/threonine nuclear kinase that interacts with homeodomain transcription factors.                                                                                                                                                                                                                                                         |

|        |                                                                                    |                                                                                                                                                                                                                                                                                                                                                 |
|--------|------------------------------------------------------------------------------------|-------------------------------------------------------------------------------------------------------------------------------------------------------------------------------------------------------------------------------------------------------------------------------------------------------------------------------------------------|
| HOXD9  | homeobox D9                                                                        | This gene belongs to the homeobox family of genes. The homeobox genes encode a highly conserved family of transcription factors that play an important role in morphogenesis in all multicellular organisms. The exact role of this gene has not been determined.                                                                               |
| HTRA2  | HtrA serine peptidase 2                                                            | This gene encodes a serine protease. The protein is thought to induce apoptosis by binding the apoptosis inhibitory protein baculoviral IAP repeat-containing 4. Nuclear localization of this protein has also been observed.                                                                                                                   |
| KCNMA1 | potassium large conductance calcium-activated channel, subfamily M, alpha member 1 | MaxiK channels are large conductance, voltage and calcium-sensitive potassium channels which are fundamental to the control of smooth muscle tone and neuronal excitability.                                                                                                                                                                    |
| MAOB   | monoamine oxidase B                                                                | This protein catalyzes the oxidative deamination of biogenic and xenobiotic amines and plays a role in the metabolism of neuroactive and vasoactive amines in the central nervous system and peripheral tissues. This protein preferentially degrades benzylamine and phenylethylamine.                                                         |
| MCOLN3 | mucolipin 3                                                                        | Mucolipins constitute a family of cation channel proteins with homologs in mouse, Drosophila, and C. elegans. Mutations in the human MCOLN1 gene (MIM 605248) cause mucopolipidosis IV (MIM 262650).                                                                                                                                            |
| MYO5A  | myosin VA (heavy chain 12, myoxin)                                                 | Myosin V is a class of actin-based motor proteins involved in cytoplasmic vesicle transport and anchorage, spindle-pole alignment and mRNA translocation. The protein encoded by this gene is abundant in melanocytes and nerve cells.                                                                                                          |
| NEFL   | neurofilament, light polypeptide                                                   | Neurofilaments are type IV intermediate filament heteropolymers composed of light, medium, and heavy chains. Neurofilaments comprise the axoskeleton and they functionally maintain the neuronal caliber. They may also play a role in intracellular transport to axons and dendrites. This gene encodes the light chain neurofilament protein. |
| NOS1   | nitric oxide synthase 1 (neuronal)                                                 | Nitric oxide is a reactive free radical which mediates neurotransmission and antimicrobial and antitumoral activities. Nitric oxide is synthesized from L-arginine by nitric oxide synthases. This gene encodes a nitric oxide synthase which is highly expressed in skeletal muscle.                                                           |
| NOVA1  | neuro-oncological ventral antigen 1                                                | This gene encodes a neuron-specific RNA-binding protein, a member of the Nova family of paraneoplastic disease antigens, that is recognized and inhibited by paraneoplastic antibodies.                                                                                                                                                         |
| NPAS3  | neuronal PAS domain protein 3                                                      |                                                                                                                                                                                                                                                                                                                                                 |
| NPY1R  | neuropeptide Y receptor Y1                                                         | Neuropeptide Y exhibits a diverse range of important physiologic activities, including effects on psychomotor activity, food intake, regulation of central endocrine secretion, and potent vasoactive effects on the cardiovascular system.                                                                                                     |
| NPY2R  | neuropeptide Y receptor Y2                                                         |                                                                                                                                                                                                                                                                                                                                                 |
| NRG1   | neuregulin 1                                                                       | This protein is a signaling protein that mediates cell-cell interactions and plays critical roles in the growth and development of multiple organ systems.                                                                                                                                                                                      |
| OPRK1  | opioid receptor, kappa 1                                                           |                                                                                                                                                                                                                                                                                                                                                 |
| PARK2  | Parkinson disease (autosomal recessive, juvenile) 2, parkin                        | The encoded protein is a component of a multiprotein E3 ubiquitin ligase complex that mediates the targeting of substrate proteins for proteasomal degradation.                                                                                                                                                                                 |
| PBX3   | pre-B-cell leukemia homeobox 3                                                     |                                                                                                                                                                                                                                                                                                                                                 |

|         |                                                                                 |                                                                                                                                                                                                                                                                                                                                               |
|---------|---------------------------------------------------------------------------------|-----------------------------------------------------------------------------------------------------------------------------------------------------------------------------------------------------------------------------------------------------------------------------------------------------------------------------------------------|
| PCDH15  | protocadherin 15                                                                | This gene encodes an integral membrane protein that mediates calcium-dependent cell-cell adhesion. It plays an essential role in maintenance of normal retinal and cochlear function.                                                                                                                                                         |
| PDE10A  | phosphodiesterase 10A                                                           | Phosphodiesterases, such as PDE10A, eliminate cAMP- and cGMP-mediated intracellular signaling by hydrolyzing the cyclic nucleotide to the corresponding nucleoside 5-prime monophosphate.                                                                                                                                                     |
| PDE1B   | phosphodiesterase 1B, calmodulin-dependent                                      |                                                                                                                                                                                                                                                                                                                                               |
| PEX13   | peroxisomal biogenesis factor 13                                                | This gene encodes a peroxisomal membrane protein that binds the type 1 peroxisomal targeting signal receptor via a SH3 domain located in the cytoplasm.                                                                                                                                                                                       |
| RCAN1   | regulator of calcineurin 1                                                      | The protein encoded by this gene interacts with calcineurin A and inhibits calcineurin-dependent signaling pathways, possibly affecting central nervous system development.                                                                                                                                                                   |
| SLC18A2 | solute carrier family 18 (vesicular monoamine), member 2                        | The vesicular monoamine transporter acts to accumulate cytosolic monoamines into synaptic vesicles, using the proton gradient maintained across the synaptic vesicular membrane. Its proper function is essential to the correct activity of the monoaminergic systems that have been implicated in several human neuropsychiatric disorders. |
| SLC6A2  | solute carrier family 6 (neurotransmitter transporter, noreadrenalin), member 2 | The SLC6A2 gene encodes a norepinephrine (noradrenaline) transporter, which is responsible for reuptake of norepinephrine into presynaptic nerve terminals and is a regulator of norepinephrine homeostasis.                                                                                                                                  |
| SNCG    | synuclein, gamma (breast cancer-specific protein 1)                             | This gene encodes a member of the synuclein family of proteins which are believed to be involved in the pathogenesis of neurodegenerative diseases.                                                                                                                                                                                           |
| SOBP    | sine oculis binding protein homolog (Drosophila)                                |                                                                                                                                                                                                                                                                                                                                               |
| SPTBN4  | spectrin, beta, non-erythrocytic 4                                              | Spectrin is an actin crosslinking and molecular scaffold protein that links the plasma membrane to the actin cytoskeleton, and functions in the determination of cell shape, arrangement of transmembrane proteins, and organization of organelles.                                                                                           |
| TH      | tyrosine hydroxylase                                                            | The protein encoded by this gene is involved in the conversion of tyrosine to dopamine. It is the rate-limiting enzyme in the synthesis of catecholamines, hence plays a key role in the physiology of adrenergic neurons.                                                                                                                    |
| TRH     | thyrotropin-releasing hormone                                                   |                                                                                                                                                                                                                                                                                                                                               |

---

Behavior, Nervous System Development and Function: Memory: Memory (2.00E-04)

|        |                                                                           |                                                                                                                                                                                                                                                                                                                                                              |
|--------|---------------------------------------------------------------------------|--------------------------------------------------------------------------------------------------------------------------------------------------------------------------------------------------------------------------------------------------------------------------------------------------------------------------------------------------------------|
| ACCN2  | amiloride-sensitive cation channel 2, neuronal                            | The member encoded by this gene is expressed in most if not all brain neurons, and it may be an ion channel subunit                                                                                                                                                                                                                                          |
| ADCY1  | adenylate cyclase 1 (brain)                                               | This gene encodes a form of adenylyl cyclase expressed in brain.                                                                                                                                                                                                                                                                                             |
| ATP1A3 | ATPase, Na <sup>+</sup> /K <sup>+</sup> transporting, alpha 3 polypeptide | This Na <sup>+</sup> /K <sup>+</sup> -ATPase is responsible for establishing and maintaining the electrochemical gradients of Na and K ions across the plasma membrane. These gradients are essential for osmoregulation, for sodium-coupled transport of a variety of organic and inorganic molecules, and for electrical excitability of nerve and muscle. |
| BACE1  | beta-site APP-cleaving enzyme 1                                           | The encoded protein, a member of the peptidase A1 protein family, is a type I integral membrane glycoprotein and aspartic protease that is found mainly in the Golgi.                                                                                                                                                                                        |

|        |                                                         |                                                                                                                                                                                                                                                                                                                      |
|--------|---------------------------------------------------------|----------------------------------------------------------------------------------------------------------------------------------------------------------------------------------------------------------------------------------------------------------------------------------------------------------------------|
| CD47   | CD47 molecule                                           | This protein, involved in the increase in intracellular calcium concentration that occurs upon cell adhesion to extracellular matrix, is also a receptor for the C-terminal cell binding domain of thrombospondin, and plays a role in membrane transport and signal transduction. It has broad tissue distribution. |
| CHRNA7 | cholinergic receptor, nicotinic, alpha 7                | The protein encoded by this gene forms a homo-oligomeric channel, displays marked permeability to calcium ions and is a major component of brain nicotinic receptors that are blocked by, and highly sensitive to, alpha-bungarotoxin.                                                                               |
| CHRN2  | cholinergic receptor, nicotinic, beta 2 (neuronal)      | The protein encoded by this gene belongs to a superfamily of ligand-gated ion channels which allow the flow of sodium and potassium across the plasma membrane in response to ligands such as acetylcholine and nicotine.                                                                                            |
| CRH    | corticotropin releasing hormone                         | CRH is secreted by the paraventricular nucleus (PVN) of the hypothalamus in response to stress. In the placenta CRH is a marker that determines the length of gestation and the timing of parturition and delivery. CRH may also act as a trigger for parturition.                                                   |
| CRHR1  | corticotropin releasing hormone receptor 1              | The encoded protein is essential for the activation of signal transduction pathways that regulate diverse physiological processes including stress, reproduction, immune response and obesity.                                                                                                                       |
| CSF3   | colony stimulating factor 3 (granulocyte)               | The protein encoded by this gene is a cytokine that controls the production, differentiation, and function of granulocytes.                                                                                                                                                                                          |
| DRD4   | dopamine receptor D4                                    | This gene encodes the D4 subtype of the dopamine receptor. Mutations in this gene have been associated with various behavioral phenotypes, including autistic disorder, attention deficit/hyperactivity disorder, and the personality trait of novelty seeking.                                                      |
| ESR1   | estrogen receptor 1                                     | This gene encodes an estrogen receptor which are essential for sexual development and reproductive function, but also play a role in other tissues such as bone.                                                                                                                                                     |
| GABRB3 | gamma-aminobutyric acid (GABA) A receptor, beta 3       | The encoded protein is one of at least 13 distinct subunits of a multisubunit chloride channel that serves as the receptor for gamma-aminobutyric acid, the major inhibitory transmitter of the nervous system.                                                                                                      |
| GLP1R  | glucagon-like peptide 1 receptor                        |                                                                                                                                                                                                                                                                                                                      |
| GRIA2  | glutamate receptor, ionotropic, AMPA 2                  | Glutamate receptors are the predominant excitatory neurotransmitter receptors in the mammalian brain and are activated in a variety of normal neurophysiologic processes. This protein functions as ligand-activated cation channels.                                                                                |
| GRIN2A | glutamate receptor, ionotropic, N-methyl D-aspartate 2A | These receptors have been shown to be involved in long-term potentiation, an activity-dependent increase in the efficiency of synaptic transmission thought to underlie certain kinds of memory and learning.                                                                                                        |
| GRIN2B | glutamate receptor, ionotropic, N-methyl D-aspartate 2B | This NMDA receptor channel has been shown to be involved in long-term potentiation, an activity-dependent increase in the efficiency of synaptic transmission thought to underlie certain kinds of memory and learning.                                                                                              |
| GRM7   | glutamate receptor, metabotropic 7                      | Glutamatergic neurotransmission is involved in most aspects of normal brain function and can be perturbed in many neuropathologic conditions. GRM4, GRM6, GRM7 and GRM8 are linked to the inhibition of the cyclic AMP cascade but differ in their agonist selectivities.                                            |
| HRH3   | histamine receptor H3                                   | This gene encodes one of the histamine receptors (H3) which can regulate neurotransmitter release. This receptor can also increase voltage-dependent calcium current in smooth muscles and innervates the blood vessels and the heart in cardiovascular system.                                                      |
| HTR1A  | 5-hydroxytryptamine (serotonin) receptor 1A             |                                                                                                                                                                                                                                                                                                                      |

|        |                                                                          |                                                                                                                                                                                                                                                                                                              |
|--------|--------------------------------------------------------------------------|--------------------------------------------------------------------------------------------------------------------------------------------------------------------------------------------------------------------------------------------------------------------------------------------------------------|
| HTR2C  | 5-hydroxytryptamine (serotonin) receptor 2C                              | Serotonin (5-hydroxytryptamine, 5-HT), a neurotransmitter, elicits a wide array of physiological effects by binding to several receptor subtypes, including the 5-HT2 family of seven-transmembrane-spanning, G-protein-coupled receptors, which activate phospholipase C and D signaling pathways.          |
| IGF1   | insulin-like growth factor 1 (somatomedin C)                             | The protein encoded by this gene is similar to insulin in function and structure and is a member of a family of proteins involved in mediating growth and development.                                                                                                                                       |
| IL1RN  | interleukin 1 receptor antagonist                                        | This protein inhibits the activities of interleukin 1, alpha (IL1A) and interleukin 1, beta (IL1B), and modulates a variety of interleukin 1 related immune and inflammatory responses.                                                                                                                      |
| JPH4   | junctophilin 4                                                           | This gene encodes a member of the junctophilin family of transmembrane proteins that are involved in the formation of the junctional membrane complexes between the plasma membrane and the endoplasmic/sarcoplasmic reticulum in excitable cells.                                                           |
| KCNAB1 | potassium voltage-gated channel, shaker-related subfamily, beta member 1 | Potassium channels' functions include regulating neurotransmitter release, heart rate, insulin secretion, neuronal excitability, epithelial electrolyte transport, smooth muscle contraction, and cell volume. This gene encodes a member of the potassium channel, voltage-gated, shaker-related subfamily. |
| KCNJ5  | potassium inwardly-rectifying channel, subfamily J, member 5             | Potassium channels are present in most mammalian cells, where they participate in a wide range of physiologic responses. The protein encoded by this gene is an integral membrane protein and inward-rectifier type potassium channel.                                                                       |
| NCAM1  | neural cell adhesion molecule 1                                          |                                                                                                                                                                                                                                                                                                              |
| NPAS3  | neuronal PAS domain protein 3                                            |                                                                                                                                                                                                                                                                                                              |
| PTEN   | phosphatase and tensin homolog                                           | This protein preferentially dephosphorylates phosphoinositide substrates. It negatively regulates intracellular levels of phosphatidylinositol-3,4,5-trisphosphate in cells and functions as a tumor suppressor by negatively regulating AKT/PKB signaling pathway.                                          |
| RCAN1  | regulator of calcineurin 1                                               | The protein encoded by this gene interacts with calcineurin A and inhibits calcineurin-dependent signaling pathways, possibly affecting central nervous system development.                                                                                                                                  |
| SNAP25 | synaptosomal-associated protein, 25kDa                                   | This gene product is a presynaptic plasma membrane protein involved in the regulation of neurotransmitter release.                                                                                                                                                                                           |
| TH     | tyrosine hydroxylase                                                     | The protein encoded by this gene is involved in the conversion of tyrosine to dopamine. It is the rate-limiting enzyme in the synthesis of catecholamines, hence plays a key role in the physiology of adrenergic neurons.                                                                                   |

Behavior: Fear: Fear  
(6.29E-04)

|        |                                                |                                                                                                                                                                                                                                                                    |
|--------|------------------------------------------------|--------------------------------------------------------------------------------------------------------------------------------------------------------------------------------------------------------------------------------------------------------------------|
| AFF2   | AF4/FMR2 family, member 2                      |                                                                                                                                                                                                                                                                    |
| ALS2   | amyotrophic lateral sclerosis 2 (juvenile)     | The protein functions as a guanine nucleotide exchange factor for the small GTPase RAB5.                                                                                                                                                                           |
| BCL2   | B-cell CLL/lymphoma 2                          | This gene encodes an integral outer mitochondrial membrane protein that blocks the apoptotic death of some cells such as lymphocytes.                                                                                                                              |
| CRH    | corticotropin releasing hormone                | CRH is secreted by the paraventricular nucleus (PVN) of the hypothalamus in response to stress. In the placenta CRH is a marker that determines the length of gestation and the timing of parturition and delivery. CRH may also act as a trigger for parturition. |
| CTNNA2 | catenin (cadherin-associated protein), alpha 2 |                                                                                                                                                                                                                                                                    |

|                                                           |         |                                                         |                                                                                                                                                                                                                                                                                                                                                                                        |
|-----------------------------------------------------------|---------|---------------------------------------------------------|----------------------------------------------------------------------------------------------------------------------------------------------------------------------------------------------------------------------------------------------------------------------------------------------------------------------------------------------------------------------------------------|
|                                                           | DRD4    | dopamine receptor D4                                    | This gene encodes the D4 subtype of the dopamine receptor. Mutations in this gene have been associated with various behavioral phenotypes, including autonomic nervous system dysfunction, attention deficit/hyperactivity disorder, and the personality trait of novelty seeking.                                                                                                     |
|                                                           | GABRG2  | gamma-aminobutyric acid (GABA) A receptor, gamma 2      | This gene encodes a gamma-aminobutyric acid (GABA) receptor. GABA is the major inhibitory neurotransmitter in the mammalian brain.                                                                                                                                                                                                                                                     |
|                                                           | GRIK2   | glutamate receptor, ionotropic, kainate 2               | This gene product belongs to the kainate family of glutamate receptors, which are composed of four subunits and function as ligand-activated ion channels.                                                                                                                                                                                                                             |
|                                                           | GRIN2B  | glutamate receptor, ionotropic, N-methyl D-aspartate 2B | This NMDA receptor channel has been shown to be involved in long-term potentiation, an activity-dependent increase in the efficiency of synaptic transmission thought to underlie certain kinds of memory and learning.                                                                                                                                                                |
|                                                           | GRM2    | glutamate receptor, metabotropic 2                      | Glutamatergic neurotransmission is involved in most aspects of normal brain function and can be perturbed in many neuropathologic conditions. GRM2 and GRM3 are linked to the inhibition of the cyclic AMP cascade but differ in their agonist selectivities.                                                                                                                          |
|                                                           | GRM7    | glutamate receptor, metabotropic 7                      | Glutamatergic neurotransmission is involved in most aspects of normal brain function and can be perturbed in many neuropathologic conditions. GRM4, GRM6, GRM7 and GRM8 are linked to the inhibition of the cyclic AMP cascade but differ in their agonist selectivities.                                                                                                              |
|                                                           | NEUROD2 | neurogenic differentiation 2                            | Expression of this gene can induce transcription from neuron-specific promoters, such as the GAP-43 promoter, which contain a specific DNA sequence known as an E-box. The product of this gene is thought to play a role in the determination and maintenance of neuronal cell fates.                                                                                                 |
|                                                           | NPY2R   | neuropeptide Y receptor Y2                              |                                                                                                                                                                                                                                                                                                                                                                                        |
| Behavior: Maternal Behavior: Maternal Behavior (5.00E-03) | ESR1    | estrogen receptor 1                                     | This gene encodes an estrogen receptor which are essential for sexual development and reproductive function, but also play a role in other tissues such as bone.                                                                                                                                                                                                                       |
|                                                           | GABRB3  | gamma-aminobutyric acid (GABA) A receptor, beta 3       | The encoded protein is one of at least 13 distinct subunits of a multisubunit chloride channel that serves as the receptor for gamma-aminobutyric acid, the major inhibitory transmitter of the nervous system.                                                                                                                                                                        |
|                                                           | NR2E1   | nuclear receptor subfamily 2, group E, member 1         |                                                                                                                                                                                                                                                                                                                                                                                        |
|                                                           | PGR     | progesterone receptor                                   | The encoded protein mediates the physiological effects of progesterone, which plays a central role in reproductive events associated with the establishment and maintenance of pregnancy.                                                                                                                                                                                              |
|                                                           | PRLR    | prolactin receptor                                      |                                                                                                                                                                                                                                                                                                                                                                                        |
| Behavior: Sniffing: Sniffing (4.95E-03)                   | CYP19A1 | cytochrome P450, family 19, subfamily A, polypeptide 1  | This protein localizes to the endoplasmic reticulum and catalyzes the last steps of estrogen biosynthesis, three successive hydroxylations of the A ring of androgens.                                                                                                                                                                                                                 |
|                                                           | OBP2B   | odorant binding protein 2B                              |                                                                                                                                                                                                                                                                                                                                                                                        |
|                                                           | PRKCG   | protein kinase C, gamma                                 | This kinase is expressed solely in the brain and spinal cord and its localization is restricted to neurons. It has been demonstrated that several neuronal functions, including long term potentiation (LTP) and long term depression (LTD), specifically require this kinase. Knockout studies in mice also suggest that this kinase may be involved in neuropathic pain development. |
|                                                           | TAS2R1  | taste receptor, type 2, member 1                        | This gene encodes a member of a family of candidate taste receptors that are specifically expressed by taste receptor cells of the tongue and palate epithelia, functioning as a bitter taste receptor.                                                                                                                                                                                |



|                                                         |         |                                                                           |                                                                                                                                                                                                                                                                                                                                                              |
|---------------------------------------------------------|---------|---------------------------------------------------------------------------|--------------------------------------------------------------------------------------------------------------------------------------------------------------------------------------------------------------------------------------------------------------------------------------------------------------------------------------------------------------|
|                                                         | TRPV1   | transient receptor potential cation channel, subfamily V, member 1        | The protein encoded by this gene is a receptor for capsaicin and is a non-selective cation channel that is structurally related to members of the TRP family of ion channels. This receptor is also activated by increases in temperature in the noxious range, suggesting that it functions as a transducer of painful thermal stimuli in vivo.             |
| Behavior: Spatial Learning: Spatial Learning (1.31E-02) | ADAM2   | ADAM metallopeptidase domain 2                                            | This gene has been implicated in a variety of biological processes involving cell-cell and cell-matrix interactions, including fertilization, muscle development, and neurogenesis.                                                                                                                                                                          |
|                                                         | ATP1A3  | ATPase, Na <sup>+</sup> /K <sup>+</sup> transporting, alpha 3 polypeptide | This Na <sup>+</sup> /K <sup>+</sup> -ATPase is responsible for establishing and maintaining the electrochemical gradients of Na and K ions across the plasma membrane. These gradients are essential for osmoregulation, for sodium-coupled transport of a variety of organic and inorganic molecules, and for electrical excitability of nerve and muscle. |
|                                                         | CACNA1C | calcium channel, voltage-dependent, L type, alpha 1C subunit              | This gene encodes an alpha-1 subunit of a voltage-dependent calcium channel. Calcium channels mediate the influx of calcium ions into the cell upon membrane polarization.                                                                                                                                                                                   |
|                                                         | CHRN2   | cholinergic receptor, nicotinic, beta 2 (neuronal)                        | The protein encoded by this gene belongs to a superfamily of ligand-gated ion channels which allow the flow of sodium and potassium across the plasma membrane in response to ligands such as acetylcholine and nicotine.                                                                                                                                    |
|                                                         | CRHR1   | corticotropin releasing hormone receptor 1                                | The encoded protein is essential for the activation of signal transduction pathways that regulate diverse physiological processes including stress, reproduction, immune response and obesity.                                                                                                                                                               |
|                                                         | GRIN2A  | glutamate receptor, ionotropic, N-methyl D-aspartate 2A                   | These receptors have been shown to be involved in long-term potentiation, an activity-dependent increase in the efficiency of synaptic transmission thought to underlie certain kinds of memory and learning.                                                                                                                                                |
|                                                         | KCNJ5   | potassium inwardly-rectifying channel, subfamily J, member 5              | Potassium channels are present in most mammalian cells, where they participate in a wide range of physiologic responses. The protein encoded by this gene is an integral membrane protein and inward-rectifier type potassium channel.                                                                                                                       |
|                                                         | KIT     | v-kit Hardy-Zuckerman 4 feline sarcoma viral oncogene homolog             | This gene encodes the human homolog of the proto-oncogene c-kit. This protein is a type 3 transmembrane receptor for MGF (mast cell growth factor, also known as stem cell factor).                                                                                                                                                                          |
|                                                         | KRAS    | v-Ki-ras2 Kirsten rat sarcoma viral oncogene homolog                      | This gene, a Kirsten ras oncogene, encodes a protein that is a member of the small GTPase superfamily. The transforming protein that results is implicated in various malignancies, including lung adenocarcinoma, mucinous adenoma, ductal carcinoma of the pancreas and colorectal carcinoma.                                                              |
|                                                         | NCDN    | neurochondrin                                                             | This gene encodes a protein, which is highly similar to a mouse protein that negatively regulates Ca/calmodulin-dependent protein kinase II phosphorylation and may be essential for spatial learning processes.                                                                                                                                             |
|                                                         | NF1     | neurofibromin 1                                                           | This gene product appears to function as a negative regulator of the ras signal transduction pathway.                                                                                                                                                                                                                                                        |
|                                                         | NLGN3   | neuroligin 3                                                              | This gene encodes a member of a family of neuronal cell surface proteins. Members of this family may act as splice site-specific ligands for beta-neurexins and may be involved in the formation and remodeling of central nervous system synapses.                                                                                                          |
|                                                         | NTRK2   | neurotrophic tyrosine kinase, receptor, type 2                            | This kinase is a membrane-bound receptor that, upon neurotrophin binding, phosphorylates itself and members of the MAPK pathway. Signalling through this kinase leads to cell differentiation.                                                                                                                                                               |

|       |                                                   |                                                                                                                                                                                                                                                                         |
|-------|---------------------------------------------------|-------------------------------------------------------------------------------------------------------------------------------------------------------------------------------------------------------------------------------------------------------------------------|
| PDE1B | phosphodiesterase 1B,<br>calmodulin-dependent     |                                                                                                                                                                                                                                                                         |
| PTPRD | protein tyrosine phosphatase,<br>receptor type, D | PTPs like this one are known to be signaling molecules that regulate a variety of cellular processes including cell growth, differentiation, mitotic cycle, and oncogenic transformation. This PTP may also promote neurite growth, and regulate neurons axon guidance. |

---

Tissue Development:  
Development:  
Development of Tissue  
(4.58E-07), *including*  
Development of Cartilage  
Tissue (4.09E-04),  
Development of Nerves  
(see also Nervous  
System Development  
and Function) (5.09E-  
04), Development of  
Placode (4.86E-03),  
Development of Muscle  
(5.47E-03), Development  
of Metanephros (5.58E-  
03), Development of  
Epithelial Tissue (7.42E-  
03), Development of  
Fetal Membranes (7.64E-  
03), Development of  
Connective Tissue  
(8.33E-03), Development  
of Nervous Tissue (see  
also Nervous System  
Development and  
Function) (1.46E-02,) Development of Allantois  
(1.65E-02)

|        |                                     |                                                                                                                                                                                                                  |
|--------|-------------------------------------|------------------------------------------------------------------------------------------------------------------------------------------------------------------------------------------------------------------|
| ACVRL1 | activin A receptor type II-like 1   | The encoded protein, sometimes termed ALK1, shares similar domain structures with other closely related ALK or activin receptor-like kinase proteins that form a subfamily of receptor serine/threonine kinases. |
| ADAM12 | ADAM metalloproteinase<br>domain 12 | This protein has been implicated in a variety of biological processes involving cell-cell and cell-matrix interactions, including fertilization, muscle development, and neurogenesis.                           |
| AGTR2  | angiotensin II receptor, type 2     | AGTR2 plays a role in the central nervous system and cardiovascular functions that are mediated by the renin-angiotensin system. This receptor mediates programmed cell death (apoptosis).                       |

|          |                                                    |                                                                                                                                                                                                                                                    |
|----------|----------------------------------------------------|----------------------------------------------------------------------------------------------------------------------------------------------------------------------------------------------------------------------------------------------------|
| AKT2     | v-akt murine thymoma viral oncogene homolog 2      | This gene is a putative oncogene encoding a subfamily of serine/threonine kinases containing SH2-like (Src homology 2-like) domains. The encoded protein is a general protein kinase capable of phosphorylating several known proteins.            |
| ANGPT1   | angiopoietin 1                                     | This protein plays a role in mediating reciprocal interactions between the endothelium and surrounding matrix and mesenchyme. It also contributes to blood vessel maturation and stability, and may be involved in early development of the heart. |
| ARSB     | arylsulfatase B                                    | The arylsulfatase B homodimer hydrolyzes sulfate groups of N-Acetyl-D-galactosamine, chondroitin sulfate, and dermatan sulfate. The protein is targeted to the lysosome.                                                                           |
| ASCL1    | achaete-scute complex homolog 1 (Drosophila)       | The protein activates transcription by binding to the E box. This protein plays a role in the neuronal commitment and differentiation and in the generation of olfactory and autonomic neurons.                                                    |
| B4GALNT1 | beta-1,4-N-acetyl-galactosaminyl transferase 1     | GalNAc-T is the enzyme involved in the biosynthesis of G(M2) and G(D2) glycosphingolipids. GalNAc-T catalyzes the transfer of GalNAc into G(M3) and G(D3) by a beta-1,4 linkage, resulting in the synthesis of G(M2) and G(D2), respectively.      |
| BACE1    | beta-site APP-cleaving enzyme 1                    | The encoded protein, a member of the peptidase A1 protein family, is a type I integral membrane glycoprotein and aspartic protease that is found mainly in the Golgi.                                                                              |
| BCL2     | B-cell CLL/lymphoma 2                              | This gene encodes an integral outer mitochondrial membrane protein that blocks the apoptotic death of some cells such as lymphocytes.                                                                                                              |
| BMP5     | bone morphogenetic protein 5                       | This protein may act as signaling molecule within the trabecular meshwork and optic nerve head, and may play a potential role in glaucoma pathogenesis. This gene is differentially regulated during the formation of various tumors.              |
| BMP7     | bone morphogenetic protein 7                       | Based on its expression early in embryogenesis, the BMP encoded by this gene has a proposed role in early development and possible bone inductive activity.                                                                                        |
| BMPR1B   | bone morphogenetic protein receptor, type IB       | The ligands of this receptor are BMPs, which are members of the TGF-beta superfamily. BMPs are involved in endochondral bone formation and embryogenesis.                                                                                          |
| BMX      | BMX non-receptor tyrosine kinase                   | One family of nonreceptor TKs includes the genes TEC (MIM 600583), TXK (MIM 600058), ITK (MIM 186973), and BTK (MIM 300300).                                                                                                                       |
| CDON     | Cdon homolog (mouse)                               | CDON and BOC (MIM 608708) are cell surface receptors of the immunoglobulin (Ig)/fibronectin type III (FNIII; see MIM 135600) repeat family involved in myogenic differentiation. CDON and BOC are coexpressed during development.                  |
| CHRN2    | cholinergic receptor, nicotinic, beta 2 (neuronal) | The protein encoded by this gene belongs to a superfamily of ligand-gated ion channels which allow the flow of sodium and potassium across the plasma membrane in response to ligands such as acetylcholine and nicotine.                          |
| COL10A1  | collagen, type X, alpha 1                          | This gene encodes the alpha chain of type X collagen, a short chain collagen expressed by hypertrophic chondrocytes during endochondral ossification. Unlike type VIII collagen, the other short chain collagen, type X collagen is a homotrimer.  |
| COL11A1  | collagen, type XI, alpha 1                         | This gene encodes one of the two alpha chains of type XI collagen, a minor fibrillar collagen. Type XI collagen is a heterotrimer but the third alpha chain is a post-translationally modified alpha 1 type II chain.                              |
| COL5A3   | collagen, type V, alpha 3                          | Type V collagen is found in tissues containing type I collagen and appears to regulate the assembly of heterotypic fibers composed of both type I and type V collagen.                                                                             |
| COL9A1   | collagen, type IX, alpha 1                         | This gene encodes one of the three alpha chains of type IX collagen, which is a minor (5-20%) collagen component of hyaline cartilage. Type IX collagen is usually found in tissues containing type II collagen, a fibrillar collagen.             |

|         |                                                        |                                                                                                                                                                                                                                                                                                                                                                                                                         |
|---------|--------------------------------------------------------|-------------------------------------------------------------------------------------------------------------------------------------------------------------------------------------------------------------------------------------------------------------------------------------------------------------------------------------------------------------------------------------------------------------------------|
| CRYGS   | crystallin, gamma S                                    | This gene encodes the most significant gamma-crystallin in adult eye lens tissue. Whether due to aging or mutations in specific genes, gamma-crystallins have been involved in cataract formation.                                                                                                                                                                                                                      |
| CTF1    | cardiotrophin 1                                        | The protein encoded by this gene is a secreted cytokine that induces cardiac myocyte hypertrophy in vitro. It has been shown to bind and activate the ILST/gp130 receptor.                                                                                                                                                                                                                                              |
| CXCL13  | chemokine (C-X-C motif) ligand 13                      | B lymphocyte chemoattractant is a CXC chemokine strongly expressed in the follicles of the spleen, lymph nodes, and Peyer's patches. It promotes the migration of B lymphocytes (compared to T cells and macrophages), apparently by stimulating calcium influx into, and chemotaxis of, cells expressing Burkitt's lymphoma receptor 1 (BLR-1). It may therefore function in the homing of B lymphocytes to follicles. |
| CYP27B1 | cytochrome P450, family 27, subfamily B, polypeptide 1 | This enzyme regulates the level of biologically active vitamin D and plays an important role in calcium homeostasis.                                                                                                                                                                                                                                                                                                    |
| DLL3    | delta-like 3 (Drosophila)                              | This gene encodes a member of the delta protein ligand family. This family functions as Notch ligands that are characterized by a DSL domain, EGF repeats, and a transmembrane domain.                                                                                                                                                                                                                                  |
| DLX1    | distal-less homeobox 1                                 | This protein may function as a transcriptional regulator of signals from multiple TGF- $\beta$ superfamily members. It may play a role in the control of craniofacial patterning and the differentiation and survival of inhibitory neurons in the forebrain.                                                                                                                                                           |
| DMD     | dystrophin                                             | Dystrophin is part of the dystrophin-glycoprotein complex (DGC), which bridges the inner cytoskeleton (F-actin) and the extra-cellular matrix.                                                                                                                                                                                                                                                                          |
| E2F1    | E2F transcription factor 1                             | The protein encoded by this gene is a member of the E2F family of transcription factors which plays a crucial role in the control of cell cycle and action of tumor suppressor proteins and is also a target of the transforming proteins of small DNA tumor viruses. It can mediate both cell proliferation and p53-dependent/independent apoptosis.                                                                   |
| ECE2    | endothelin converting enzyme 2                         | Endothelin-converting enzymes, such as ECE2 (EC 3.4.24.71), are type II metalloproteases that generate functionally pleiotropic members of the endothelin vasoactive peptide family.                                                                                                                                                                                                                                    |
| EDA     | ectodysplasin A                                        | The encoded protein, which belongs to the tumor necrosis factor family, acts as a homotrimer and may be involved in cell-cell signaling during the development of ectodermal organs.                                                                                                                                                                                                                                    |
| EDIL3   | EGF-like repeats and discoidin I-like domains 3        | The protein encoded by this gene is an integrin ligand. It plays an important role in mediating angiogenesis and may be important in vessel wall remodeling and development. It also influences endothelial cell behavior.                                                                                                                                                                                              |
| EDNRA   | endothelin receptor type A                             |                                                                                                                                                                                                                                                                                                                                                                                                                         |
| EFNB3   | ephrin-B3                                              | EFNB3, a member of the ephrin gene family, is important in brain development as well as in its maintenance. It may play a pivotal role in forebrain function. The EPH and EPH-related receptors comprise the largest subfamily of receptor protein-tyrosine kinases and have been implicated in mediating developmental events, particularly in the nervous system.                                                     |
| ENAH    | enabled homolog (Drosophila)                           |                                                                                                                                                                                                                                                                                                                                                                                                                         |
| ENPP1   | ectonucleotide pyrophosphatase/phosphodiesterase 1     | This protein cleaves many substrates, including phosphodiester bonds of nucleotides and nucleotide sugars and pyrophosphate bonds of nucleotides and nucleotide sugars. It may function to hydrolyze nucleoside 5' triphosphates to their corresponding monophosphates and diadenosine polyphosphates.                                                                                                                  |
| EPHA7   | EPH receptor A7                                        | EPH and EPH-related receptors have been implicated in mediating developmental events, particularly in the nervous system.                                                                                                                                                                                                                                                                                               |

|       |                                                                  |                                                                                                                                                                                                                                                                                                                                        |
|-------|------------------------------------------------------------------|----------------------------------------------------------------------------------------------------------------------------------------------------------------------------------------------------------------------------------------------------------------------------------------------------------------------------------------|
| EPOR  | erythropoietin receptor                                          | This erythropoietin receptor activates Jak2 tyrosine kinase which activates different intracellular pathways including: Ras/MAP kinase, phosphatidylinositol 3-kinase and STAT transcription factors. The stimulated erythropoietin receptor appears to have a role in erythroid cell survival.                                        |
| ERBB4 | v-erb-a erythroblastic leukemia viral oncogene homolog 4 (avian) | This gene encodes a protein which binds to and is activated by neuregulins and other factors and induces a variety of cellular responses including mitogenesis and differentiation.                                                                                                                                                    |
| ESR1  | estrogen receptor 1                                              | This gene encodes an estrogen receptor which are essential for sexual development and reproductive function, but also play a role in other tissues such as bone.                                                                                                                                                                       |
| ESRRB | estrogen-related receptor beta                                   | This protein is similar to the estrogen receptor. Its function is unknown; however, a similar protein in mouse plays a key role in placental development.                                                                                                                                                                              |
| EVI1  | ecotropic viral integration site 1                               |                                                                                                                                                                                                                                                                                                                                        |
| EYA1  | eyes absent homolog 1 (Drosophila)                               | The encoded protein may play a role in the developing kidney, branchial arches, eye, and ear.                                                                                                                                                                                                                                          |
| FASLG | Fas ligand (TNF superfamily, member 6)                           | Interaction of FAS with this ligand is critical in triggering apoptosis of some types of cells such as lymphocytes.                                                                                                                                                                                                                    |
| FGF1  | fibroblast growth factor 1 (acidic)                              | This protein functions as a modifier of endothelial cell migration and proliferation, as well as an angiogenic factor. It acts as a mitogen for a variety of mesoderm- and neuroectoderm-derived cells in vitro, thus is thought to be involved in organogenesis.                                                                      |
| FGF2  | fibroblast growth factor 2 (basic)                               | The CUG-initiated isoforms of this gene are localized in the nucleus and are responsible for the intracrine effect, whereas, the AUG-initiated form is mostly cytosolic and is responsible for the paracrine and autocrine effects of this FGF.                                                                                        |
| FGF4  | fibroblast growth factor 4                                       | This gene was identified by its oncogenic transforming activity. Studies on the mouse homolog suggested a function in bone morphogenesis and limb development through the sonic hedgehog (SHH) signaling pathway.                                                                                                                      |
| FGF7  | fibroblast growth factor 7 (keratinocyte growth factor)          | This protein is an epithelial cell-specific growth factor, whose mitogenic activity is exhibited in keratinocytes but not in fibroblasts and endothelial cells. It may also be implicated roles in morphogenesis of epithelium, reepithelialization of wounds, hair development and early lung organogenesis.                          |
| FGF10 | fibroblast growth factor 10                                      | This protein exhibits mitogenic activity for keratinizing epidermal cells, but essentially no activity for fibroblasts. It may be required for embryonic epidermal morphogenesis including brain development, lung morphogenesis, and initiation of limb bud formation. It is also implicated to be a primary factor in wound healing. |
| FGF13 | fibroblast growth factor 13                                      | This gene is a possible candidate gene for familial cases of the BFLS, and for other syndromal and nonspecific forms of X-linked mental retardation, due to its chromosomal location.                                                                                                                                                  |
| FGF17 | fibroblast growth factor 17                                      | This gene is predominately expressed in the cerebellum and cortex. In mice it is localized to specific sites in the midline structures of the forebrain, the midbrain-hindbrain junction, developing skeleton and developing arteries, which suggests a role in CNS, bone and vascular development.                                    |
| FGF18 | fibroblast growth factor 18                                      | This protein may be a pleiotropic growth factor that stimulates proliferation in many tissues, notably the liver and small intestine. Knockout studies in mice implied the its role in regulating proliferation and differentiation of midline cerebellar structures.                                                                  |
| FGFR2 | fibroblast growth factor receptor 2                              | The extracellular portion of this protein interacts with fibroblast growth factors, setting in motion a cascade of downstream signals, ultimately influencing mitogenesis and differentiation.                                                                                                                                         |

|       |                                                   |                                                                                                                                                                                                                                                                                                                                |
|-------|---------------------------------------------------|--------------------------------------------------------------------------------------------------------------------------------------------------------------------------------------------------------------------------------------------------------------------------------------------------------------------------------|
| FKTN  | fukutin                                           | The protein encoded by this gene may be involved in the glycosylation of alpha-dystroglycan in skeletal muscle. The encoded protein is thought to be a glycosyltransferase and could play a role in brain development.                                                                                                         |
| FN1   | fibronectin 1                                     | Fibronectin is involved in cell adhesion and migration processes including embryogenesis, wound healing, blood coagulation, host defense, and metastasis.                                                                                                                                                                      |
| FOXA1 | forkhead box A1                                   | These hepatocyte nuclear factors are transcriptional activators for liver-specific transcripts such as albumin and transthyretin, and they also interact with chromatin. Similar family members in mice have roles in the regulation of metabolism and in the differentiation of the pancreas and liver.                       |
| FOXA2 | forkhead box A2                                   | These hepatocyte nuclear factors are transcriptional activators for liver-specific genes such as albumin and transthyretin, and they also interact with chromatin. Similar family members have roles in the regulation of metabolism and in the differentiation of the pancreas and liver.                                     |
| FRAS1 | Fraser syndrome 1                                 | The FRAS1 gene encodes a putative extracellular matrix (ECM) protein and is mutated in Fraser syndrome (MIM 219000).                                                                                                                                                                                                           |
| FREM2 | FRAS1 related extracellular matrix protein 2      | This extracellular matrix protein is thought to be required for maintaining the integrity of the skin epithelium and the differentiated state of renal epithelia. The protein localizes to the basement membrane, forming a ternary complex that plays a role in epidermal-dermal interactions during morphogenetic processes. |
| FXR1  | fragile X mental retardation, autosomal homolog 1 | The protein encoded by this gene is an RNA binding protein that shuttles between the nucleus and cytoplasm and associate with polyribosomes, predominantly with the 60S ribosomal subunit.                                                                                                                                     |
| GAB1  | GRB2-associated binding protein 1                 | The protein encoded by this gene is an important mediator of branching tubulogenesis and plays a central role in cellular growth response, transformation and apoptosis.                                                                                                                                                       |
| GATA4 | GATA binding protein 4                            | This protein is thought to regulate genes involved in embryogenesis and in myocardial differentiation and function.                                                                                                                                                                                                            |
| GDNF  | glial cell derived neurotrophic factor            | The recombinant form of this protein was shown to promote the survival and differentiation of dopaminergic neurons in culture, and was able to prevent apoptosis of motor neurons induced by axotomy.                                                                                                                          |
| GJB2  | gap junction protein, beta 2, 26kDa               | This gene encodes a member of the gap junction protein family. These structures were shown to consist of cell-to-cell channels that facilitate the transfer of ions and small molecules between cells.                                                                                                                         |
| GJC1  | gap junction protein, gamma 1, 45kDa              | The encoded protein is a component of gap junctions, which are composed of arrays of intercellular channels that provide a route for the diffusion of low molecular weight materials from cell to cell.                                                                                                                        |
| GLI3  | GLI family zinc finger 3                          | The protein encoded by this gene localizes in the cytoplasm and activates patched Drosophila homolog (PTCH) gene expression. It is also thought to play a role during embryogenesis.                                                                                                                                           |
| GNAS  | GNAS complex locus                                | This protein is associated with the classical signal transduction pathway linking receptor-ligand interactions with the activation of adenylyl cyclase and a variety of cellular responses.                                                                                                                                    |
| HDAC9 | histone deacetylase 9                             | Histone acetylation/deacetylation alters chromosome structure and affects transcription factor access to DNA. The protein encoded by this gene has sequence homology to members of the histone deacetylase family. This encoded protein may play a role in hematopoiesis.                                                      |
| HES1  | hairy and enhancer of split 1, (Drosophila)       | It is a transcriptional repressor of genes that require a bHLH protein for their transcription. The protein has a particular type of basic domain that contains a helix interrupting protein that binds to the N-box rather than the canonical E-box.                                                                          |
| HES7  | hairy and enhancer of split 7 (Drosophila)        | In mouse, Hes7 expression is associated with somitogenesis and is controlled by Notch (see MIM 190198) signaling.                                                                                                                                                                                                              |

|        |                                                          |                                                                                                                                                                                                                                                                                                                                                   |
|--------|----------------------------------------------------------|---------------------------------------------------------------------------------------------------------------------------------------------------------------------------------------------------------------------------------------------------------------------------------------------------------------------------------------------------|
| HEY1   | hairy/enhancer-of-split related with YRPW motif 1        | This gene encodes a transcriptional repressor. Two similar and redundant genes in mouse are required for embryonic cardiovascular development, and are also implicated in neurogenesis and somitogenesis.                                                                                                                                         |
| HGF    | hepatocyte growth factor (hepapoietin A; scatter factor) | Hepatocyte growth factor regulates cell growth, cell motility, and morphogenesis by activating a tyrosine kinase signaling cascade after binding to the proto-oncogenic c-Met receptor. Its ability to stimulate mitogenesis, cell motility, and matrix invasion gives it a central role in angiogenesis, tumorigenesis, and tissue regeneration. |
| HMG2   | high mobility group AT-hook 2                            | This gene encodes a protein that belongs to the non-histone chromosomal high mobility group (HMG) protein family. HMG proteins function as architectural factors and are essential components of the enhancesome. This protein contains structural DNA-binding domains and may act as a transcriptional regulating factor.                        |
| HMX2   | H6 family homeobox 2                                     |                                                                                                                                                                                                                                                                                                                                                   |
| HOXA2  | homeobox A2                                              | This gene is a DNA-binding transcription factor which may regulate gene expression, morphogenesis, and differentiation. It may be involved in the placement of hindbrain segments in the proper location along the anterior-posterior axis during development.                                                                                    |
| HOXB2  | homeobox B2                                              | The encoded protein functions as a sequence-specific transcription factor that is involved in development.                                                                                                                                                                                                                                        |
| HOXB3  | homeobox B3                                              | The encoded protein functions as a sequence-specific transcription factor that is involved in development.                                                                                                                                                                                                                                        |
| HOXB13 | homeobox B13                                             | This gene has been implicated to play a role in fetal skin development and cutaneous regeneration. Studies have exhibited temporal and spatial colinearity in the main body axis of the embryo, but it was not expressed in the secondary axes, which suggests functions in body patterning along the axis.                                       |
| HOXC4  | homeobox C4                                              | Homeobox transcription factors play an important role in morphogenesis in all multicellular organisms. This gene, HOXC4, is one of several homeobox HOXC genes located in a cluster on chromosome 12.                                                                                                                                             |
| HOXC10 | homeobox C10                                             | The homeobox transcription factors play an important role in morphogenesis in all multicellular organisms. The protein level is controlled during cell differentiation and proliferation, which may indicate this protein has a role in origin activation.                                                                                        |
| HOXD3  | homeobox D3                                              | The protein encoded by this gene may play a role in the regulation of cell adhesion processes.                                                                                                                                                                                                                                                    |
| HOXD8  | homeobox D8                                              | In addition to effects during embryogenesis, this particular gene may also play a role in adult urogenital tract function.                                                                                                                                                                                                                        |
| HOXD9  | homeobox D9                                              | This gene belongs to the homeobox family of genes. The homeobox genes encode a highly conserved family of transcription factors that play an important role in morphogenesis in all multicellular organisms. The exact role of this gene has not been determined.                                                                                 |
| HSPB2  | heat shock 27kDa protein 2                               |                                                                                                                                                                                                                                                                                                                                                   |
| IGF1   | insulin-like growth factor 1 (somatomedin C)             | The protein encoded by this gene is similar to insulin in function and structure and is a member of a family of proteins involved in mediating growth and development.                                                                                                                                                                            |
| IGFBP5 | insulin-like growth factor binding protein 5             |                                                                                                                                                                                                                                                                                                                                                   |
| IHH    | Indian hedgehog homolog (Drosophila)                     |                                                                                                                                                                                                                                                                                                                                                   |
| IKZF3  | IKAROS family zinc finger 3 (Aiolos)                     | This gene product is a transcription factor that is important in the regulation of B lymphocyte proliferation and differentiation. Both Ikaros and Aiolos can participate in chromatin remodeling.                                                                                                                                                |

|       |                                                                                              |                                                                                                                                                                                                                                                                                                                                                             |
|-------|----------------------------------------------------------------------------------------------|-------------------------------------------------------------------------------------------------------------------------------------------------------------------------------------------------------------------------------------------------------------------------------------------------------------------------------------------------------------|
| IL11  | interleukin 11                                                                               | This cytokine is shown to stimulate the T-cell-dependent development of immunoglobulin-producing B cells. It is also found to support the proliferation of hematopoietic stem cells and megakaryocyte progenitor cells.                                                                                                                                     |
| ITGA7 | integrin, alpha 7                                                                            | This protein functions as a receptor for the basement membrane protein laminin-1. It is mainly expressed in skeletal and cardiac muscles and may be involved in differentiation and migration processes during myogenesis.                                                                                                                                  |
| ITGA9 | integrin, alpha 9                                                                            | The protein encoded by this gene, when bound to the beta 1 chain, forms an integrin that is a receptor for VCAM1, cytotactin and osteopontin.                                                                                                                                                                                                               |
| ITGB1 | integrin, beta 1 (fibronectin receptor, beta polypeptide, antigen CD29 includes MDF2, MSK12) | Integrin family members are membrane receptors involved in cell adhesion and recognition in a variety of processes including embryogenesis, hemostasis, tissue repair, immune response and metastatic diffusion of tumor cells.                                                                                                                             |
| JAG2  | jagged 2                                                                                     | Members of the Notch gene family encode transmembrane receptors that are critical for various cell fate decisions. The protein encoded by this gene is one of several ligands that activate Notch and related receptors.                                                                                                                                    |
| JPH1  | junctophilin 1                                                                               | The protein encoded by this gene is a component of junctional complexes and is composed of a C-terminal hydrophobic segment spanning the endoplasmic/sarcoplasmic reticulum membrane and a remaining cytoplasmic domain that shows specific affinity for the plasma membrane.                                                                               |
| LAMA2 | laminin, alpha 2                                                                             | Laminin, an extracellular protein, is a major component of the basement membrane. It is thought to mediate the attachment, migration, and organization of cells into tissues during embryonic development by interacting with other extracellular matrix components.                                                                                        |
| LAMA4 | laminin, alpha 4                                                                             | Laminins, a family of extracellular matrix glycoproteins, are the major noncollagenous constituent of basement membranes. They have been implicated in a wide variety of biological processes including cell adhesion, differentiation, migration, signaling, neurite outgrowth and metastasis. This gene encodes the alpha chain isoform laminin, alpha 4. |
| LAMA5 | laminin, alpha 5                                                                             | The protein encoded by this gene belongs to the alpha subfamily of laminin chains and is a major component of basement membranes.                                                                                                                                                                                                                           |
| LEF1  | lymphoid enhancer-binding factor 1                                                           | LEF1 is a nuclear protein that is expressed in pre-B and T cells. It binds to a functionally important site in the T-cell receptor-alpha (TCRA; MIM 186880) enhancer and confers maximal enhancer activity.                                                                                                                                                 |
| LRP8  | low density lipoprotein receptor-related protein 8, apolipoprotein e receptor                | This apolipoprotein E receptor is involved in cellular recognition and internalization of these lipoproteins.                                                                                                                                                                                                                                               |
| LUM   | lumican                                                                                      | Lumican is the major keratan sulfate proteoglycan of the cornea but is also distributed in interstitial collagenous matrices throughout the body. Lumican may regulate collagen fibril organization and circumferential growth, corneal transparency, and epithelial cell migration and tissue repair.                                                      |
| MAF   | v-maf musculoaponeurotic fibrosarcoma oncogene homolog (avian)                               |                                                                                                                                                                                                                                                                                                                                                             |
| MAPK8 | mitogen-activated protein kinase 8                                                           | This kinase mediates immediate-early gene expression in response to cell stimuli and is related to cytochrome c-mediated cell death pathway. The mouse counterpart plays a key role in T cell proliferation, apoptosis and differentiation.                                                                                                                 |



|        |                                                         |                                                                                                                                                                                                                                                                                                                    |
|--------|---------------------------------------------------------|--------------------------------------------------------------------------------------------------------------------------------------------------------------------------------------------------------------------------------------------------------------------------------------------------------------------|
| MEF2B  | myocyte enhancer factor 2B                              | The protein is thought to regulate gene expression, including expression of the smooth muscle myosin heavy chain gene.                                                                                                                                                                                             |
| MESP1  | mesoderm posterior 1 homolog (mouse)                    |                                                                                                                                                                                                                                                                                                                    |
| MET    | met proto-oncogene (hepatocyte growth factor receptor)  | The proto-oncogene MET product is the hepatocyte growth factor receptor and encodes tyrosine-kinase activity.                                                                                                                                                                                                      |
| METTL8 | methyltransferase like 8                                |                                                                                                                                                                                                                                                                                                                    |
| MMP13  | matrix metalloproteinase 13 (collagenase 3)             | The protein encoded by this gene cleaves type II collagen more efficiently than types I and III. It may be involved in articular cartilage turnover and cartilage pathophysiology associated with osteoarthritis.                                                                                                  |
| MNX1   | motor neuron and pancreas homeobox 1                    |                                                                                                                                                                                                                                                                                                                    |
| MSX1   | msh homeobox 1                                          | This protein functions as a transcriptional repressor during embryogenesis through interactions with components of the core transcription complex and other homeoproteins. It may also have roles in limb-pattern formation, craniofacial development, particularly odontogenesis, and tumor growth inhibition.    |
| MUSK   | muscle, skeletal, receptor tyrosine kinase              | This kinase activity is regulated by the binding of a cognate ligand to the extracellular portion of the receptor. DeChiara et al. (1996) [PubMed 8653786] noted that the RTKs, known to be expressed in cell type-specific fashions, play a role critical for the growth and differentiation of those cell types. |
| MYF5   | myogenic factor 5                                       |                                                                                                                                                                                                                                                                                                                    |
| MYF6   | myogenic factor 6 (herculin)                            |                                                                                                                                                                                                                                                                                                                    |
| MYO5A  | myosin VA (heavy chain 12, myoxin)                      | Myosin V is a class of actin-based motor proteins involved in cytoplasmic vesicle transport and anchorage, spindle-pole alignment and mRNA translocation. The protein encoded by this gene is abundant in melanocytes and nerve cells.                                                                             |
| MYOD1  | myogenic differentiation 1                              | This gene encodes a nuclear protein that regulates muscle cell differentiation by inducing cell cycle arrest, a prerequisite for myogenic initiation. The protein is also involved in muscle regeneration. It activates its own transcription which may stabilize commitment to myogenesis.                        |
| MYOG   | myogenin (myogenic factor 4)                            | Myogenin is a muscle-specific transcription factor that can induce myogenesis in a variety of cell types in tissue culture. It is essential for the development of functional skeletal muscle.                                                                                                                     |
| NF1    | neurofibromin 1                                         | This gene product appears to function as a negative regulator of the ras signal transduction pathway.                                                                                                                                                                                                              |
| NFIX   | nuclear factor I/X (CCAAT-binding transcription factor) |                                                                                                                                                                                                                                                                                                                    |
| NKX2-1 | NK2 homeobox 1                                          |                                                                                                                                                                                                                                                                                                                    |
| NOG    | noggin                                                  | This protein may have a principal role in creating morphogenic gradients, and in numerous developmental processes, such as neural tube fusion and joint formation.                                                                                                                                                 |
| NOS1   | nitric oxide synthase 1 (neuronal)                      | Nitric oxide is a reactive free radical which mediates neurotransmission and antimicrobial and antitumoral activities. Nitric oxide is synthesized from L-arginine by nitric oxide synthases. This gene encodes a nitric oxide synthase which is highly expressed in skeletal muscle.                              |
| NR2F2  | nuclear receptor subfamily 2, group F, member 2         |                                                                                                                                                                                                                                                                                                                    |
| NRG1   | neuregulin 1                                            | This protein is a signaling protein that mediates cell-cell interactions and plays critical roles in the growth and development of multiple organ systems.                                                                                                                                                         |

|        |                                                                                                 |                                                                                                                                                                                                                                                                                                                                    |
|--------|-------------------------------------------------------------------------------------------------|------------------------------------------------------------------------------------------------------------------------------------------------------------------------------------------------------------------------------------------------------------------------------------------------------------------------------------|
| NRP2   | neuropilin 2                                                                                    | The encoded transmembrane protein binds to SEMA3C protein and SEMA3F protein, and interacts with vascular endothelial growth factor (VEGF). This protein may play a role in cardiovascular development, axon guidance, and tumorigenesis.                                                                                          |
| NRTN   | neurturin                                                                                       | Neurturin is a member of the TGF-beta subfamily, TRN. This gene signals through RET and a GPI-linked coreceptor, and promotes survival of neuronal populations.                                                                                                                                                                    |
| NTRK2  | neurotrophic tyrosine kinase, receptor, type 2                                                  | This kinase is a membrane-bound receptor that, upon neurotrophin binding, phosphorylates itself and members of the MAPK pathway. Signalling through this kinase leads to cell differentiation.                                                                                                                                     |
| NTRK3  | neurotrophic tyrosine kinase, receptor, type 3                                                  | This kinase is a membrane-bound receptor that, upon neurotrophin binding, phosphorylates itself and members of the MAPK pathway. Signalling through this kinase leads to cell differentiation and may play a role in the development of proprioceptive neurons that sense body position.                                           |
| NUP133 | nucleoporin 133kDa                                                                              | The nucleoporin protein encoded by this gene localizes to both sides of the nuclear pore complex at interphase, remains associated with the complex during mitosis and is targeted at early stages to the reforming nuclear envelope. It also localizes to kinetochores of mitotic cells.                                          |
| PAX2   | paired box 2                                                                                    | PAX2 is believed to be a target of transcriptional suppression by the tumor suppressor gene WT1.                                                                                                                                                                                                                                   |
| PAX3   | paired box 3                                                                                    | Members of the PAX family play critical roles during fetal development.                                                                                                                                                                                                                                                            |
| PAX8   | paired box 8                                                                                    | This nuclear protein is involved in thyroid follicular cell development and expression of thyroid-specific genes.                                                                                                                                                                                                                  |
| PCDH15 | protocadherin 15                                                                                | This gene encodes an integral membrane protein that mediates calcium-dependent cell-cell adhesion. It plays an essential role in maintenance of normal retinal and cochlear function.                                                                                                                                              |
| PDGFB  | platelet-derived growth factor beta polypeptide (simian sarcoma viral (v-sis) oncogene homolog) | The protein encoded by this gene is a member of the platelet-derived growth factor family. The four members of this family are mitogenic factors for cells of mesenchymal origin and are characterized by a motif of eight cysteines.                                                                                              |
| PLN    | phospholamban                                                                                   | This protein is a major substrate for the cAMP-dependent protein kinase in cardiac muscle. It is an inhibitor of cardiac muscle sarcoplasmic reticulum Ca(2+)-ATPase in the unphosphorylated state, but inhibition is relieved upon phosphorylation. It is a key regulator of cardiac diastolic function.                          |
| POU3F1 | POU class 3 homeobox 1                                                                          |                                                                                                                                                                                                                                                                                                                                    |
| POU6F1 | POU class 6 homeobox 1                                                                          |                                                                                                                                                                                                                                                                                                                                    |
| PRKACB | protein kinase, cAMP-dependent, catalytic, beta                                                 | The protein encoded by this gene is a member of the Ser/Thr protein kinase family and is a catalytic subunit of cAMP-dependent protein kinase.                                                                                                                                                                                     |
| PROX1  | prospero homeobox 1                                                                             |                                                                                                                                                                                                                                                                                                                                    |
| PRRX1  | paired related homeobox 1                                                                       | This protein functions as a transcription co-activator, enhancing the DNA-binding activity of serum response factor, a protein required for the induction of genes by growth and differentiation factors. The protein regulates muscle creatine kinase, indicating a role in the establishment of diverse mesodermal muscle types. |
| PRRX2  | paired related homeobox 2                                                                       | Expression is localized to proliferating fetal fibroblasts and the developing dermal layer, with downregulated expression in adult skin. The expression patterns provide evidence consistent with a role in fetal skin development and a possible role in cellular proliferation.                                                  |
| PTCH1  | patched homolog 1 (Drosophila)                                                                  | The encoded protein is the receptor for sonic hedgehog, a secreted molecule implicated in the formation of embryonic structures and in tumorigenesis, as well as the desert hedgehog and indian hedgehog proteins. This gene functions as a tumor suppressor.                                                                      |

|         |                                                                        |                                                                                                                                                                                                                                                                                                                                                                                                               |
|---------|------------------------------------------------------------------------|---------------------------------------------------------------------------------------------------------------------------------------------------------------------------------------------------------------------------------------------------------------------------------------------------------------------------------------------------------------------------------------------------------------|
| PTEN    | phosphatase and tensin homolog                                         | This protein preferentially dephosphorylates phosphoinositide substrates. It negatively regulates intracellular levels of phosphatidylinositol-3,4,5-trisphosphate in cells and functions as a tumor suppressor by negatively regulating AKT/PKB signaling pathway.                                                                                                                                           |
| PTH1H   | parathyroid hormone-like hormone                                       | This hormone regulates endochondral bone development and epithelial-mesenchymal interactions during the formation of the mammary glands and teeth. It is involved in lactation possibly by regulating the mobilization and transfer of calcium to the milk.                                                                                                                                                   |
| PTPRB   | protein tyrosine phosphatase, receptor type, B                         | The extracellular region of this PTP interacts with neuronal receptor and cell adhesion molecules, such as contactin and tenascin C. It also interacts with sodium channels, and may regulate sodium channels by altering tyrosine phosphorylation. The functions of the interaction partners of this protein implicate the roles of this PTP in cell adhesion, neurite growth, and neuronal differentiation. |
| PYY     | peptide YY                                                             |                                                                                                                                                                                                                                                                                                                                                                                                               |
| RBL1    | retinoblastoma-like 1 (p107)                                           | It is thought that, given the homology to the known tumor suppressor RB1, the protein encoded by this gene may also be a tumor suppressor.                                                                                                                                                                                                                                                                    |
| RBPJ    | recombination signal binding protein for immunoglobulin kappa J region |                                                                                                                                                                                                                                                                                                                                                                                                               |
| ROBO2   | roundabout, axon guidance receptor, homolog 2 (Drosophila)             | The encoded protein is a receptor for SLIT2, molecules known to function in axon guidance and cell migration.                                                                                                                                                                                                                                                                                                 |
| ROR2    | receptor tyrosine kinase-like orphan receptor 2                        | The protein may be involved in the early formation of the chondrocytes and may be required for cartilage and growth plate development.                                                                                                                                                                                                                                                                        |
| RUNX2   | runt-related transcription factor 2                                    | This protein is essential for osteoblastic differentiation and skeletal morphogenesis and acts as a scaffold for nucleic acids and regulatory factors involved in skeletal gene expression.                                                                                                                                                                                                                   |
| RYK     | RYK receptor-like tyrosine kinase                                      | The protein encoded by this gene is an atypical member of the family of growth factor receptor protein tyrosine kinases, differing from other members at a number of conserved residues in the activation and nucleotide binding domains.                                                                                                                                                                     |
| SALL1   | sal-like 1 (Drosophila)                                                | The protein encoded by this gene is a zinc finger transcriptional repressor and may be part of the NuRD histone deacetylase complex (HDAC).                                                                                                                                                                                                                                                                   |
| SGCD    | sarcoglycan, delta (35kDa dystrophin-associated glycoprotein)          | The protein encoded by this gene is one of the four known components of the sarcoglycan complex, which is a subcomplex of the dystrophin-glycoprotein complex (DGC). This protein is expressed most abundantly in skeletal and cardiac muscle.                                                                                                                                                                |
| SIX2    | SIX homeobox 2                                                         | The encoded protein is a transcription factor which, like other members of this gene family, may be involved in limb or eye development.                                                                                                                                                                                                                                                                      |
| SLC34A1 | solute carrier family 34 (sodium phosphate), member 1                  |                                                                                                                                                                                                                                                                                                                                                                                                               |
| SLURP1  | secreted LY6/PLAUR domain containing 1                                 | It is thought that this secreted protein contains antitumor activity.                                                                                                                                                                                                                                                                                                                                         |
| SMO     | smoothened homolog (Drosophila)                                        |                                                                                                                                                                                                                                                                                                                                                                                                               |
| SMTN    | smoothelin                                                             | This gene encodes a structural protein that is found exclusively in contractile smooth muscle cells. It associates with stress fibers and constitutes part of the cytoskeleton.                                                                                                                                                                                                                               |

|        |                                                                                                    |                                                                                                                                                                                                                                                                                                                                    |
|--------|----------------------------------------------------------------------------------------------------|------------------------------------------------------------------------------------------------------------------------------------------------------------------------------------------------------------------------------------------------------------------------------------------------------------------------------------|
| SOX6   | SRY (sex determining region Y)-box 6                                                               | This protein is a transcriptional activator is required for normal development of the CNS, chondrogenesis and maintenance of cardiac and skeletal muscle cells. It interacts with other family members to cooperatively activate gene expression.                                                                                  |
| SOX15  | SRY (sex determining region Y)-box 15                                                              | This SOX family transcription factor is involved in the regulation of embryonic development and in the determination of the cell fate. It may act as a transcriptional regulator after forming a protein complex with other proteins.                                                                                              |
| SPEG   | SPEG complex locus                                                                                 | Expression of this gene is thought to serve as a marker for differentiated vascular smooth muscle cells which may have a role in regulating growth and differentiation of this cell type.                                                                                                                                          |
| SRI    | sorcin                                                                                             |                                                                                                                                                                                                                                                                                                                                    |
| STIL   | SCL/TAL1 interrupting locus                                                                        | This gene encodes a cytoplasmic protein implicated in regulation of the mitotic spindle checkpoint, a regulatory pathway that monitors chromosome segregation during cell division to ensure the proper distribution of chromosomes to daughter cells.                                                                             |
| STX2   | syntaxin 2                                                                                         | The product of this gene regulates epithelial-mesenchymal interactions and epithelial cell morphogenesis and activation.                                                                                                                                                                                                           |
| TBX5   | T-box 5                                                                                            | This protein may play a role in heart development and specification of limb identity.                                                                                                                                                                                                                                              |
| TCF4   | transcription factor 4                                                                             | This protein recognizes an Ephrussi-box ('E-box') binding site ('CANNTG') - a motif first identified in immunoglobulin enhancers. It is expressed predominantly in pre-B-cells, although it is found in other tissues as well.                                                                                                     |
| TCF12  | transcription factor 12                                                                            | This protein is expressed in many tissues, among them skeletal muscle, thymus, B- and T-cells, and may participate in regulating lineage-specific gene expression through the formation of heterodimers with other bHLH E-proteins.                                                                                                |
| TCF21  | transcription factor 21                                                                            | The TCF21 product is mesoderm specific, and expressed in embryonic epicardium, mesenchyme-derived tissues of lung, gut, gonad, and both mesenchymal and glomerular epithelial cells in the kidney.                                                                                                                                 |
| TCF7L2 | transcription factor 7-like 2 (T-cell specific, HMG-box)                                           | This protein has been implicated in blood glucose homeostasis. Genetic variants of this gene are associated with increased risk of type 2 diabetes.                                                                                                                                                                                |
| TEK    | TEK tyrosine kinase, endothelial                                                                   | The TEK receptor tyrosine kinase is expressed almost exclusively in endothelial cells, and its ligand is angiopoietin-1. The TEK signaling pathway appears to be critical for endothelial cell-smooth muscle cell communication in venous morphogenesis.                                                                           |
| TGFBR3 | transforming growth factor, beta receptor III                                                      | Transforming growth factor (TGF)-beta is a multifunctional cytokine that modulates several tissue development and repair processes, including cell differentiation, cell cycle progression, cellular migration, adhesion, and extracellular matrix production.                                                                     |
| THBS2  | thrombospondin 2                                                                                   | This protein mediates cell-to-cell and cell-to-matrix interactions. It has been shown to function as a potent inhibitor of tumor growth and angiogenesis. Studies of the mouse counterpart suggest that this protein may modulate the cell surface properties of mesenchymal cells and be involved in cell adhesion and migration. |
| THRB   | thyroid hormone receptor, beta (erythroblastic leukemia viral (v-erb-a) oncogene homolog 2, avian) | The protein encoded by this gene is a nuclear hormone receptor for triiodothyronine. It is one of the several receptors for thyroid hormone, and has been shown to mediate the biological activities of thyroid hormone.                                                                                                           |
| TINAG  | tubulointerstitial nephritis antigen                                                               | TINAG is a basement membrane glycoprotein initially identified as a target of antibodies in some forms of immunologically mediated tubulointerstitial nephritis.                                                                                                                                                                   |

|                                                                                                                                |       |                                                       |                                                                                                                                                                                                                                                                                                                             |
|--------------------------------------------------------------------------------------------------------------------------------|-------|-------------------------------------------------------|-----------------------------------------------------------------------------------------------------------------------------------------------------------------------------------------------------------------------------------------------------------------------------------------------------------------------------|
|                                                                                                                                | TP63  | tumor protein p63                                     | This protein plays a role in the development and maintenance of stratified epithelial tissues. p63 <sup>-/-</sup> mice have several developmental defects which include the lack of limbs and other tissues, such as teeth and mammary glands, which develop as a result of interactions between mesenchyme and epithelium. |
|                                                                                                                                | TRIO  | triple functional domain (PTPRF interacting)          |                                                                                                                                                                                                                                                                                                                             |
|                                                                                                                                | TTN   | titin                                                 | This gene encodes a large abundant protein of striated muscle. Titin also contains binding sites for muscle associated proteins so it serves as an adhesion template for the assembly of contractile machinery in muscle cells. It has also been identified as a structural protein for chromosomes.                        |
|                                                                                                                                | WT1   | Wilms tumor 1                                         | This protein has an essential role in the normal development of the urogenital system, and it is mutated in a small subset of patients with Wilm's tumors.                                                                                                                                                                  |
|                                                                                                                                | ZFPM2 | zinc finger protein, multitype 2                      | Proteins which modulate the activity of GATA family proteins are important regulators of hematopoiesis and cardiogenesis. This protein can both activate and down-regulate expression of GATA-target genes.                                                                                                                 |
|                                                                                                                                | ZIC2  | Zic family member 2 (odd-paired homolog, Drosophila)  | This protein functions as a transcriptional repressor and may regulate tissue specific expression of dopamine receptor D1.                                                                                                                                                                                                  |
|                                                                                                                                | ZIC3  | Zic family member 3 (odd-paired homolog, Drosophila)  | This nuclear protein probably functions as a transcription factor in early stages of left-right body axis formation.                                                                                                                                                                                                        |
| <hr/>                                                                                                                          |       |                                                       |                                                                                                                                                                                                                                                                                                                             |
| Tissue Development:<br>Development:<br>Development of Bone Marrow (1.65E-02)                                                   | BCL2  | B-cell CLL/lymphoma 2                                 | This gene encodes an integral outer mitochondrial membrane protein that blocks the apoptotic death of some cells such as lymphocytes.                                                                                                                                                                                       |
|                                                                                                                                | IL5   | interleukin 5 (colony-stimulating factor, eosinophil) | The protein encoded by this gene is a cytokine that acts as a growth and differentiation factor for both B cells and eosinophils. This cytokine is a main regulator of eosinopoiesis, eosinophil maturation and activation.                                                                                                 |
|                                                                                                                                | NOS1  | nitric oxide synthase 1 (neuronal)                    | Nitric oxide is a reactive free radical which mediates neurotransmission and antimicrobial and antitumoral activities. Nitric oxide is synthesized from L-arginine by nitric oxide synthases. This gene encodes a nitric oxide synthase which is highly expressed in skeletal muscle.                                       |
|                                                                                                                                | SELE  | selectin E                                            | The protein encoded by this gene is found in cytokine-stimulated endothelial cells and is thought to be responsible for the accumulation of blood leukocytes at sites of inflammation by mediating the adhesion of cells to the vascular lining. It exhibits st                                                             |
|                                                                                                                                | TEK   | TEK tyrosine kinase, endothelial                      | The TEK receptor tyrosine kinase is expressed almost exclusively in endothelial cells, and its ligand is angiopoietin-1. The TEK signaling pathway appears to be critical for endothelial cell-smooth muscle cell communication in venous morphogenesis.                                                                    |
| <hr/>                                                                                                                          |       |                                                       |                                                                                                                                                                                                                                                                                                                             |
| Tissue Development,<br>Nervous System<br>Development and<br>Function: Development:<br>Development of Olfactory Bulb (1.65E-02) | ARX   | aristaless related homeobox                           | This gene is a homeobox-containing gene expressed during development, and is thought to be involved in CNS development.                                                                                                                                                                                                     |

|       |                                                    |                                                                                                          |
|-------|----------------------------------------------------|----------------------------------------------------------------------------------------------------------|
| EBF2  | early B-cell factor 2                              | EBF2 belongs to the conserved Olf/EBF family (see MIM 164343) of helix-loop-helix transcription factors. |
| EBF3  | early B-cell factor 3                              |                                                                                                          |
| NR2E1 | nuclear receptor subfamily 2,<br>group E, member 1 |                                                                                                          |
| TRIO  | triple functional domain<br>(PTPRF interacting)    |                                                                                                          |

---

Tissue Development:  
Developmental Process:  
Developmental Process  
of Tissue (4.50E-05)  
*including* Developmental  
Process of Nerves  
(1.17E-04),  
Developmental Process  
of Cartilage Tissue  
(3.27E-04),  
Developmental Process  
of Muscle (2.17E-03),  
Developmental Process  
of Epithelial Tissue  
(3.24E-03),  
Developmental Process  
of Placode (3.56E-03),  
Developmental Process  
of Nervous Tissue (4.48E-  
03), Developmental  
Process of  
Atrioventricular Canal  
Cushion (1.70E-02),  
Developmental Process  
of Flexor Muscle (3.56E-  
03)

|        |                                                 |                                                                                                                                                                                                                  |
|--------|-------------------------------------------------|------------------------------------------------------------------------------------------------------------------------------------------------------------------------------------------------------------------|
| ACVRL1 | activin A receptor type II-like 1               | The encoded protein, sometimes termed ALK1, shares similar domain structures with other closely related ALK or activin receptor-like kinase proteins that form a subfamily of receptor serine/threonine kinases. |
| ADAM12 | ADAM metallopeptidase domain 12                 | This protein has been implicated in a variety of biological processes involving cell-cell and cell-matrix interactions, including fertilization, muscle development, and neurogenesis.                           |
| ADIPOQ | adiponectin, C1Q and collagen domain containing | This gene is expressed in adipose tissue exclusively. The encoded protein circulates in the plasma and is involved with metabolic and hormonal processes.                                                        |

|          |                                                    |                                                                                                                                                                                                                                                    |
|----------|----------------------------------------------------|----------------------------------------------------------------------------------------------------------------------------------------------------------------------------------------------------------------------------------------------------|
| AGTR2    | angiotensin II receptor, type 2                    | AGTR2 plays a role in the central nervous system and cardiovascular functions that are mediated by the renin-angiotensin system. This receptor mediates programmed cell death (apoptosis).                                                         |
| AKT2     | v-akt murine thymoma viral oncogene homolog 2      | This gene is a putative oncogene encoding a subfamily of serine/threonine kinases containing SH2-like (Src homology 2-like) domains. The encoded protein is a general protein kinase capable of phosphorylating several known proteins.            |
| ALDH1A3  | aldehyde dehydrogenase 1 family, member A3         | Aldehyde dehydrogenase isozymes are thought to play a major role in the detoxification of aldehydes generated by alcohol metabolism and lipid peroxidation.                                                                                        |
| ANGPT1   | angiopoietin 1                                     | This protein plays a role in mediating reciprocal interactions between the endothelium and surrounding matrix and mesenchyme. It also contributes to blood vessel maturation and stability, and may be involved in early development of the heart. |
| AR       | androgen receptor                                  | This protein functions as a steroid-hormone activated transcription factor.                                                                                                                                                                        |
| ARSB     | arylsulfatase B                                    | The arylsulfatase B homodimer hydrolyzes sulfate groups of N-Acetyl-D-galactosamine, chondroitin sulfate, and dermatan sulfate. The protein is targeted to the lysosome.                                                                           |
| ASCL1    | achaete-scute complex homolog 1 (Drosophila)       | The protein activates transcription by binding to the E box. This protein plays a role in the neuronal commitment and differentiation and in the generation of olfactory and autonomic neurons.                                                    |
| B4GALNT1 | beta-1,4-N-acetyl-galactosaminyl transferase 1     | GalNAc-T is the enzyme involved in the biosynthesis of G(M2) and G(D2) glycosphingolipids. GalNAc-T catalyzes the transfer of GalNAc into G(M3) and G(D3) by a beta-1,4 linkage, resulting in the synthesis of G(M2) and G(D2), respectively.      |
| BACE1    | beta-site APP-cleaving enzyme 1                    | The encoded protein, a member of the peptidase A1 protein family, is a type I integral membrane glycoprotein and aspartic protease that is found mainly in the Golgi.                                                                              |
| BCL2     | B-cell CLL/lymphoma 2                              | This gene encodes an integral outer mitochondrial membrane protein that blocks the apoptotic death of some cells such as lymphocytes.                                                                                                              |
| BMP5     | bone morphogenetic protein 5                       | This protein may act as signaling molecule within the trabecular meshwork and optic nerve head, and may play a potential role in glaucoma pathogenesis. This gene is differentially regulated during the formation of various tumors.              |
| BMP7     | bone morphogenetic protein 7                       | Based on its expression early in embryogenesis, the BMP encoded by this gene has a proposed role in early development and possible bone inductive activity.                                                                                        |
| BMPR1B   | bone morphogenetic protein receptor, type IB       | The ligands of this receptor are BMPs, which are members of the TGF-beta superfamily. BMPs are involved in endochondral bone formation and embryogenesis.                                                                                          |
| BMX      | BMX non-receptor tyrosine kinase                   | One family of nonreceptor TKs includes the genes TEC (MIM 600583), TXK (MIM 600058), ITK (MIM 186973), and BTK (MIM 300300).                                                                                                                       |
| CDON     | Cdon homolog (mouse)                               | CDON and BOC (MIM 608708) are cell surface receptors of the immunoglobulin (Ig)/fibronectin type III (FNIII); see MIM 135600) repeat family involved in myogenic differentiation. CDON and BOC are coexpressed during development.                 |
| CHRN2    | cholinergic receptor, nicotinic, beta 2 (neuronal) | The protein encoded by this gene belongs to a superfamily of ligand-gated ion channels which allow the flow of sodium and potassium across the plasma membrane in response to ligands such as acetylcholine and nicotine.                          |
| COL10A1  | collagen, type X, alpha 1                          | This gene encodes the alpha chain of type X collagen, a short chain collagen expressed by hypertrophic chondrocytes during endochondral ossification. Unlike type VIII collagen, the other short chain collagen, type X collagen is a homotrimer.  |
| COL11A1  | collagen, type XI, alpha 1                         | This gene encodes one of the two alpha chains of type XI collagen, a minor fibrillar collagen. Type XI collagen is a heterotrimer but the third alpha chain is a post-translationally modified alpha 1 type II chain.                              |

|         |                                                        |                                                                                                                                                                                                                                                                                                                                                                                                                         |
|---------|--------------------------------------------------------|-------------------------------------------------------------------------------------------------------------------------------------------------------------------------------------------------------------------------------------------------------------------------------------------------------------------------------------------------------------------------------------------------------------------------|
| COL5A3  | collagen, type V, alpha 3                              | Type V collagen is found in tissues containing type I collagen and appears to regulate the assembly of heterotypic fibers composed of both type I and type V collagen.                                                                                                                                                                                                                                                  |
| COL9A1  | collagen, type IX, alpha 1                             | This gene encodes one of the three alpha chains of type IX collagen, which is a minor (5-20%) collagen component of hyaline cartilage. Type IX collagen is usually found in tissues containing type II collagen, a fibrillar collagen.                                                                                                                                                                                  |
| CRYGS   | crystallin, gamma S                                    | This gene encodes the most significant gamma-crystallin in adult eye lens tissue. Whether due to aging or mutations in specific genes, gamma-crystallins have been involved in cataract formation.                                                                                                                                                                                                                      |
| CTF1    | cardiotrophin 1                                        | The protein encoded by this gene is a secreted cytokine that induces cardiac myocyte hypertrophy in vitro. It has been shown to bind and activate the ILST/gp130 receptor.                                                                                                                                                                                                                                              |
| CXCL13  | chemokine (C-X-C motif) ligand 13                      | B lymphocyte chemoattractant is a CXC chemokine strongly expressed in the follicles of the spleen, lymph nodes, and Peyer's patches. It promotes the migration of B lymphocytes (compared to T cells and macrophages), apparently by stimulating calcium influx into, and chemotaxis of, cells expressing Burkitt's lymphoma receptor 1 (BLR-1). It may therefore function in the homing of B lymphocytes to follicles. |
| CYP27B1 | cytochrome P450, family 27, subfamily B, polypeptide 1 | This enzyme regulates the level of biologically active vitamin D and plays an important role in calcium homeostasis.                                                                                                                                                                                                                                                                                                    |
| DLL3    | delta-like 3 (Drosophila)                              | This gene encodes a member of the delta protein ligand family. This family functions as Notch ligands that are characterized by a DSL domain, EGF repeats, and a transmembrane domain.                                                                                                                                                                                                                                  |
| DLX1    | distal-less homeobox 1                                 | This protein may function as a transcriptional regulator of signals from multiple TGF- $\beta$ superfamily members. It may play a role in the control of craniofacial patterning and the differentiation and survival of inhibitory neurons in the forebrain.                                                                                                                                                           |
| DMD     | dystrophin                                             | Dystrophin is part of the dystrophin-glycoprotein complex (DGC), which bridges the inner cytoskeleton (F-actin) and the extra-cellular matrix.                                                                                                                                                                                                                                                                          |
| E2F1    | E2F transcription factor 1                             | The protein encoded by this gene is a member of the E2F family of transcription factors which plays a crucial role in the control of cell cycle and action of tumor suppressor proteins and is also a target of the transforming proteins of small DNA tumor viruses. It can mediate both cell proliferation and p53-dependent/independent apoptosis.                                                                   |
| ECE2    | endothelin converting enzyme 2                         | Endothelin-converting enzymes, such as ECE2 (EC 3.4.24.71), are type II metalloproteases that generate functionally pleiotropic members of the endothelin vasoactive peptide family.                                                                                                                                                                                                                                    |
| EDA     | ectodysplasin A                                        | The encoded protein, which belongs to the tumor necrosis factor family, acts as a homotrimer and may be involved in cell-cell signaling during the development of ectodermal organs.                                                                                                                                                                                                                                    |
| EDIL3   | EGF-like repeats and discoidin I-like domains 3        | The protein encoded by this gene is an integrin ligand. It plays an important role in mediating angiogenesis and may be important in vessel wall remodeling and development. It also influences endothelial cell behavior.                                                                                                                                                                                              |
| EDNRA   | endothelin receptor type A                             |                                                                                                                                                                                                                                                                                                                                                                                                                         |
| EFNB3   | ephrin-B3                                              | EFNB3, a member of the ephrin gene family, is important in brain development as well as in its maintenance. It may play a pivotal role in forebrain function. The EPH and EPH-related receptors comprise the largest subfamily of receptor protein-tyrosine kinases and have been implicated in mediating developmental events, particularly in the nervous system.                                                     |
| ENAH    | enabled homolog (Drosophila)                           |                                                                                                                                                                                                                                                                                                                                                                                                                         |



|       |                                                                  |                                                                                                                                                                                                                                                                                                                                        |
|-------|------------------------------------------------------------------|----------------------------------------------------------------------------------------------------------------------------------------------------------------------------------------------------------------------------------------------------------------------------------------------------------------------------------------|
| ENPP1 | ectonucleotide pyrophosphatase/phosphodiesterase 1               | This protein cleaves many substrates, including phosphodiester bonds of nucleotides and nucleotide sugars and pyrophosphate bonds of nucleotides and nucleotide sugars. It may function to hydrolyze nucleoside 5' triphosphates to their corresponding monophosphates and diadenosine polyphosphates.                                 |
| EPHA7 | EPH receptor A7                                                  | EPH and EPH-related receptors have been implicated in mediating developmental events, particularly in the nervous system.                                                                                                                                                                                                              |
| EPOR  | erythropoietin receptor                                          | This erythropoietin receptor activates Jak2 tyrosine kinase which activates different intracellular pathways including: Ras/MAP kinase, phosphatidylinositol 3-kinase and STAT transcription factors. The stimulated erythropoietin receptor appears to have a role in erythroid cell survival.                                        |
| ERBB4 | v-erb-a erythroblastic leukemia viral oncogene homolog 4 (avian) | This gene encodes a protein which binds to and is activated by neuregulins and other factors and induces a variety of cellular responses including mitogenesis and differentiation.                                                                                                                                                    |
| ESR1  | estrogen receptor 1                                              | This gene encodes an estrogen receptor which are essential for sexual development and reproductive function, but also play a role in other tissues such as bone.                                                                                                                                                                       |
| ESRRB | estrogen-related receptor beta                                   | This protein is similar to the estrogen receptor. Its function is unknown; however, a similar protein in mouse plays a key role in placental development.                                                                                                                                                                              |
| EVI1  | ecotropic viral integration site 1                               |                                                                                                                                                                                                                                                                                                                                        |
| EYA1  | eyes absent homolog 1 (Drosophila)                               | The encoded protein may play a role in the developing kidney, branchial arches, eye, and ear.                                                                                                                                                                                                                                          |
| FASLG | Fas ligand (TNF superfamily, member 6)                           | Interaction of FAS with this ligand is critical in triggering apoptosis of some types of cells such as lymphocytes.                                                                                                                                                                                                                    |
| FGF1  | fibroblast growth factor 1 (acidic)                              | This protein functions as a modifier of endothelial cell migration and proliferation, as well as an angiogenic factor. It acts as a mitogen for a variety of mesoderm- and neuroectoderm-derived cells in vitro, thus is thought to be involved in organogenesis.                                                                      |
| FGF2  | fibroblast growth factor 2 (basic)                               | The CUG-initiated isoforms of this gene are localized in the nucleus and are responsible for the intracrine effect, whereas, the AUG-initiated form is mostly cytosolic and is responsible for the paracrine and autocrine effects of this FGF.                                                                                        |
| FGF4  | fibroblast growth factor 4                                       | This gene was identified by its oncogenic transforming activity. Studies on the mouse homolog suggested a function in bone morphogenesis and limb development through the sonic hedgehog (SHH) signaling pathway.                                                                                                                      |
| FGF7  | fibroblast growth factor 7 (keratinocyte growth factor)          | This protein is an epithelial cell-specific growth factor, whose mitogenic activity is exhibited in keratinocytes but not in fibroblasts and endothelial cells. It may also be implicated roles in morphogenesis of epithelium, reepithelialization of wounds, hair development and early lung organogenesis.                          |
| FGF10 | fibroblast growth factor 10                                      | This protein exhibits mitogenic activity for keratinizing epidermal cells, but essentially no activity for fibroblasts. It may be required for embryonic epidermal morphogenesis including brain development, lung morphogenesis, and initiation of limb bud formation. It is also implicated to be a primary factor in wound healing. |
| FGF13 | fibroblast growth factor 13                                      | This gene is a possible candidate gene for familial cases of the BFLS, and for other syndromal and nonspecific forms of X-linked mental retardation, due to its chromosomal location.                                                                                                                                                  |
| FGF17 | fibroblast growth factor 17                                      | This gene is predominately expressed in the cerebellum and cortex. In mice it is localized to specific sites in the midline structures of the forebrain, the midbrain-hindbrain junction, developing skeleton and developing arteries, which suggests a role in CNS, bone and vascular development.                                    |

|       |                                                   |                                                                                                                                                                                                                                                                                                                                |
|-------|---------------------------------------------------|--------------------------------------------------------------------------------------------------------------------------------------------------------------------------------------------------------------------------------------------------------------------------------------------------------------------------------|
| FGF18 | fibroblast growth factor 18                       | This protein may be a pleiotropic growth factor that stimulates proliferation in many tissues, notably the liver and small intestine. Knockout studies in mice implied the its role in regulating proliferation and differentiation of midline cerebellar structures.                                                          |
| FGFR2 | fibroblast growth factor receptor 2               | The extracellular portion of this protein interacts with fibroblast growth factors, setting in motion a cascade of downstream signals, ultimately influencing mitogenesis and differentiation.                                                                                                                                 |
| FKTN  | fukutin                                           | The protein encoded by this gene may be involved in the glycosylation of alpha-dystroglycan in skeletal muscle. The encoded protein is thought to be a glycosyltransferase and could play a role in brain development.                                                                                                         |
| FN1   | fibronectin 1                                     | Fibronectin is involved in cell adhesion and migration processes including embryogenesis, wound healing, blood coagulation, host defense, and metastasis.                                                                                                                                                                      |
| FOXA1 | forkhead box A1                                   | These hepatocyte nuclear factors are transcriptional activators for liver-specific transcripts such as albumin and transthyretin, and they also interact with chromatin. Similar family members in mice have roles in the regulation of metabolism and in the differentiation of the pancreas and liver.                       |
| FOXA2 | forkhead box A2                                   | These hepatocyte nuclear factors are transcriptional activators for liver-specific genes such as albumin and transthyretin, and they also interact with chromatin. Similar family members have roles in the regulation of metabolism and in the differentiation of the pancreas and liver.                                     |
| FRAS1 | Fraser syndrome 1                                 | The FRAS1 gene encodes a putative extracellular matrix (ECM) protein and is mutated in Fraser syndrome (MIM 219000).                                                                                                                                                                                                           |
| FREM2 | FRAS1 related extracellular matrix protein 2      | This extracellular matrix protein is thought to be required for maintaining the integrity of the skin epithelium and the differentiated state of renal epithelia. The protein localizes to the basement membrane, forming a ternary complex that plays a role in epidermal-dermal interactions during morphogenetic processes. |
| FXR1  | fragile X mental retardation, autosomal homolog 1 | The protein encoded by this gene is an RNA binding protein that shuttles between the nucleus and cytoplasm and associate with polyribosomes, predominantly with the 60S ribosomal subunit.                                                                                                                                     |
| GAB1  | GRB2-associated binding protein 1                 | The protein encoded by this gene is an important mediator of branching tubulogenesis and plays a central role in cellular growth response, transformation and apoptosis.                                                                                                                                                       |
| GATA4 | GATA binding protein 4                            | This protein is thought to regulate genes involved in embryogenesis and in myocardial differentiation and function.                                                                                                                                                                                                            |
| GDNF  | glial cell derived neurotrophic factor            | The recombinant form of this protein was shown to promote the survival and differentiation of dopaminergic neurons in culture, and was able to prevent apoptosis of motor neurons induced by axotomy.                                                                                                                          |
| GJB2  | gap junction protein, beta 2, 26kDa               | This gene encodes a member of the gap junction protein family. These structures were shown to consist of cell-to-cell channels that facilitate the transfer of ions and small molecules between cells.                                                                                                                         |
| GJC1  | gap junction protein, gamma 1, 45kDa              | The encoded protein is a component of gap junctions, which are composed of arrays of intercellular channels that provide a route for the diffusion of low molecular weight materials from cell to cell.                                                                                                                        |
| GLI3  | GLI family zinc finger 3                          | The protein encoded by this gene localizes in the cytoplasm, activates patched Drosophila homolog (PTCH) gene expression and plays a role during embryogenesis.                                                                                                                                                                |
| GLP1R | glucagon-like peptide 1 receptor                  |                                                                                                                                                                                                                                                                                                                                |
| GNAS  | GNAS complex locus                                | This protein is associated with the classical signal transduction pathway linking receptor-ligand interactions with the activation of adenylyl cyclase and a variety of cellular reponses.                                                                                                                                     |

|        |                                                          |                                                                                                                                                                                                                                                                                                                                                   |
|--------|----------------------------------------------------------|---------------------------------------------------------------------------------------------------------------------------------------------------------------------------------------------------------------------------------------------------------------------------------------------------------------------------------------------------|
| HDAC9  | histone deacetylase 9                                    | Histone acetylation/deacetylation alters chromosome structure and affects transcription factor access to DNA. The protein encoded by this gene has sequence homology to members of the histone deacetylase family. This encoded protein may play a role in hematopoiesis.                                                                         |
| HES1   | hairy and enhancer of split 1, (Drosophila)              | It is a transcriptional repressor of genes that require a bHLH protein for their transcription. The protein has a particular type of basic domain that contains a helix interrupting protein that binds to the N-box rather than the canonical E-box.                                                                                             |
| HES7   | hairy and enhancer of split 7 (Drosophila)               | In mouse, Hes7 expression is associated with somitogenesis and is controlled by Notch (see MIM 190198) signaling.                                                                                                                                                                                                                                 |
| HEY1   | hairy/enhancer-of-split related with YRPW motif 1        | This gene encodes a transcriptional repressor. Two similar and redundant genes in mouse are required for embryonic cardiovascular development, and are also implicated in neurogenesis and somitogenesis.                                                                                                                                         |
| HGF    | hepatocyte growth factor (hepapoietin A; scatter factor) | Hepatocyte growth factor regulates cell growth, cell motility, and morphogenesis by activating a tyrosine kinase signaling cascade after binding to the proto-oncogenic c-Met receptor. Its ability to stimulate mitogenesis, cell motility, and matrix invasion gives it a central role in angiogenesis, tumorigenesis, and tissue regeneration. |
| HMG2   | high mobility group AT-hook 2                            | This gene encodes a protein that belongs to the non-histone chromosomal high mobility group (HMG) protein family. HMG proteins function as architectural factors and are essential components of the enhancesome. This protein contains structural DNA-binding domains and may act as a transcriptional regulating factor.                        |
| HMX2   | H6 family homeobox 2                                     |                                                                                                                                                                                                                                                                                                                                                   |
| HOXA2  | homeobox A2                                              | This gene is a DNA-binding transcription factor which may regulate gene expression, morphogenesis, and differentiation. It may be involved in the placement of hindbrain segments in the proper location along the anterior-posterior axis during development.                                                                                    |
| HOXB2  | homeobox B2                                              | The encoded protein functions as a sequence-specific transcription factor that is involved in development.                                                                                                                                                                                                                                        |
| HOXB3  | homeobox B3                                              | The encoded protein functions as a sequence-specific transcription factor that is involved in development.                                                                                                                                                                                                                                        |
| HOXB13 | homeobox B13                                             | This gene has been implicated to play a role in fetal skin development and cutaneous regeneration. Studies have exhibited temporal and spatial colinearity in the main body axis of the embryo, but it was not expressed in the secondary axes, which suggests functions in body patterning along the axis.                                       |
| HOXC4  | homeobox C4                                              | Homeobox transcription factors play an important role in morphogenesis in all multicellular organisms. This gene, HOXC4, is one of several homeobox HOXC genes located in a cluster on chromosome 12.                                                                                                                                             |
| HOXC10 | homeobox C10                                             | The homeobox transcription factors play an important role in morphogenesis in all multicellular organisms. The protein level is controlled during cell differentiation and proliferation, which may indicate this protein has a role in origin activation.                                                                                        |
| HOXD3  | homeobox D3                                              | The protein encoded by this gene may play a role in the regulation of cell adhesion processes.                                                                                                                                                                                                                                                    |
| HOXD8  | homeobox D8                                              | In addition to effects during embryogenesis, this particular gene may also play a role in adult urogenital tract function.                                                                                                                                                                                                                        |
| HOXD9  | homeobox D9                                              | This gene belongs to the homeobox family of genes. The homeobox genes encode a highly conserved family of transcription factors that play an important role in morphogenesis in all multicellular organisms. The exact role of this gene has not been determined.                                                                                 |
| HSPB2  | heat shock 27kDa protein 2                               |                                                                                                                                                                                                                                                                                                                                                   |

|        |                                                                                              |                                                                                                                                                                                                                                                                                                                                                             |
|--------|----------------------------------------------------------------------------------------------|-------------------------------------------------------------------------------------------------------------------------------------------------------------------------------------------------------------------------------------------------------------------------------------------------------------------------------------------------------------|
| IGF1   | insulin-like growth factor 1 (somatomedin C)                                                 | The protein encoded by this gene is similar to insulin in function and structure and is a member of a family of proteins involved in mediating growth and development.                                                                                                                                                                                      |
| IGFBP5 | insulin-like growth factor binding protein 5                                                 |                                                                                                                                                                                                                                                                                                                                                             |
| IHH    | Indian hedgehog homolog (Drosophila)                                                         |                                                                                                                                                                                                                                                                                                                                                             |
| IKZF3  | IKAROS family zinc finger 3 (Aiolos)                                                         | This gene product is a transcription factor that is important in the regulation of B lymphocyte proliferation and differentiation. Both Ikaros and Aiolos can participate in chromatin remodeling.                                                                                                                                                          |
| IL11   | interleukin 11                                                                               | This cytokine is shown to stimulate the T-cell-dependent development of immunoglobulin-producing B cells. It is also found to support the proliferation of hematopoietic stem cells and megakaryocyte progenitor cells.                                                                                                                                     |
| IL17A  | interleukin 17A                                                                              | This protein is a proinflammatory cytokine produced by activated T cells that regulates the activities of NF-kappaB and mitogen-activated protein kinases. It can stimulate the expression of IL6 and cyclooxygenase-2 (PTGS2/COX-2), and enhance the production of nitric oxide (NO).                                                                      |
| IL1RN  | interleukin 1 receptor antagonist                                                            | This protein inhibits the activities of interleukin 1, alpha (IL1A) and interleukin 1, beta (IL1B), and modulates a variety of interleukin 1 related immune and inflammatory responses.                                                                                                                                                                     |
| ITGA7  | integrin, alpha 7                                                                            | This protein functions as a receptor for the basement membrane protein laminin-1. It is mainly expressed in skeletal and cardiac muscles and may be involved in differentiation and migration processes during myogenesis.                                                                                                                                  |
| ITGA9  | integrin, alpha 9                                                                            | The protein encoded by this gene, when bound to the beta 1 chain, forms an integrin that is a receptor for VCAM1, cytotactin and osteopontin.                                                                                                                                                                                                               |
| ITGB1  | integrin, beta 1 (fibronectin receptor, beta polypeptide, antigen CD29 includes MDF2, MSK12) | Integrin family members are membrane receptors involved in cell adhesion and recognition in a variety of processes including embryogenesis, hemostasis, tissue repair, immune response and metastatic diffusion of tumor cells.                                                                                                                             |
| JAG2   | jagged 2                                                                                     | Members of the Notch gene family encode transmembrane receptors that are critical for various cell fate decisions. The protein encoded by this gene is one of several ligands that activate Notch and related receptors.                                                                                                                                    |
| JPH1   | junctional protein 1                                                                         | The protein encoded by this gene is a component of junctional complexes and is composed of a C-terminal hydrophobic segment spanning the endoplasmic/sarcoplasmic reticulum membrane and a remaining cytoplasmic domain that shows specific affinity for the plasma membrane.                                                                               |
| LAMA2  | laminin, alpha 2                                                                             | Laminin, an extracellular protein, is a major component of the basement membrane. It is thought to mediate the attachment, migration, and organization of cells into tissues during embryonic development by interacting with other extracellular matrix components.                                                                                        |
| LAMA4  | laminin, alpha 4                                                                             | Laminins, a family of extracellular matrix glycoproteins, are the major noncollagenous constituent of basement membranes. They have been implicated in a wide variety of biological processes including cell adhesion, differentiation, migration, signaling, neurite outgrowth and metastasis. This gene encodes the alpha chain isoform laminin, alpha 4. |
| LAMA5  | laminin, alpha 5                                                                             | The protein encoded by this gene belongs to the alpha subfamily of laminin chains and is a major component of basement membranes.                                                                                                                                                                                                                           |
| LEF1   | lymphoid enhancer-binding factor 1                                                           | LEF1 is a nuclear protein that is expressed in pre-B and T cells. It binds to a functionally important site in the T-cell receptor-alpha (TCRA; MIM 186880) enhancer and confers maximal enhancer activity.                                                                                                                                                 |

|        |                                                                               |                                                                                                                                                                                                                                                                                                                    |
|--------|-------------------------------------------------------------------------------|--------------------------------------------------------------------------------------------------------------------------------------------------------------------------------------------------------------------------------------------------------------------------------------------------------------------|
| LRP8   | low density lipoprotein receptor-related protein 8, apolipoprotein e receptor | This apolipoprotein E receptor is involved in cellular recognition and internalization of these lipoproteins.                                                                                                                                                                                                      |
| LUM    | lumican                                                                       | Lumican is the major keratan sulfate proteoglycan of the cornea but is also distributed in interstitial collagenous matrices throughout the body. Lumican may regulate collagen fibril organization and circumferential growth, corneal transparency, and epithelial cell migration and tissue repair.             |
| MAF    | v-maf musculoaponeurotic fibrosarcoma oncogene homolog (avian)                |                                                                                                                                                                                                                                                                                                                    |
| MAPK8  | mitogen-activated protein kinase 8                                            | This kinase mediates immediate-early gene expression in response to cell stimuli and is related to cytochrome c-mediated cell death pathway. The mouse counterpart plays a key role in T cell proliferation, apoptosis and differentiation.                                                                        |
| MEF2B  | myocyte enhancer factor 2B                                                    | The protein is thought to regulate gene expression, including expression of the smooth muscle myosin heavy chain gene.                                                                                                                                                                                             |
| MESP1  | mesoderm posterior 1 homolog (mouse)                                          |                                                                                                                                                                                                                                                                                                                    |
| MET    | met proto-oncogene (hepatocyte growth factor receptor)                        | The proto-oncogene MET product is the hepatocyte growth factor receptor and encodes tyrosine-kinase activity.                                                                                                                                                                                                      |
| METTL8 | methyltransferase like 8                                                      |                                                                                                                                                                                                                                                                                                                    |
| MMP13  | matrix metalloproteinase 13 (collagenase 3)                                   | The protein encoded by this gene cleaves type II collagen more efficiently than types I and III. It may be involved in articular cartilage turnover and cartilage pathophysiology associated with osteoarthritis.                                                                                                  |
| MNX1   | motor neuron and pancreas homeobox 1                                          |                                                                                                                                                                                                                                                                                                                    |
| MSX1   | msh homeobox 1                                                                | This protein functions as a transcriptional repressor during embryogenesis through interactions with components of the core transcription complex and other homeoproteins. It may also have roles in limb-pattern formation, craniofacial development, particularly odontogenesis, and tumor growth inhibition.    |
| MUSK   | muscle, skeletal, receptor tyrosine kinase                                    | This kinase activity is regulated by the binding of a cognate ligand to the extracellular portion of the receptor. DeChiara et al. (1996) [PubMed 8653786] noted that the RTKs, known to be expressed in cell type-specific fashions, play a role critical for the growth and differentiation of those cell types. |
| MYF5   | myogenic factor 5                                                             |                                                                                                                                                                                                                                                                                                                    |
| MYF6   | myogenic factor 6 (herculin)                                                  |                                                                                                                                                                                                                                                                                                                    |
| MYO5A  | myosin VA (heavy chain 12, myoxin)                                            | Myosin V is a class of actin-based motor proteins involved in cytoplasmic vesicle transport and anchorage, spindle-pole alignment and mRNA translocation. The protein encoded by this gene is abundant in melanocytes and nerve cells.                                                                             |
| MYOD1  | myogenic differentiation 1                                                    | This gene encodes a nuclear protein that regulates muscle cell differentiation by inducing cell cycle arrest, a prerequisite for myogenic initiation. The protein is also involved in muscle regeneration. It activates its own transcription which may stabilize commitment to myogenesis.                        |
| MYOG   | myogenin (myogenic factor 4)                                                  | Myogenin is a muscle-specific transcription factor that can induce myogenesis in a variety of cell types in tissue culture. It is essential for the development of functional skeletal muscle.                                                                                                                     |
| NANOG  | Nanog homeobox                                                                |                                                                                                                                                                                                                                                                                                                    |

|        |                                                         |                                                                                                                                                                                                                                                                                           |
|--------|---------------------------------------------------------|-------------------------------------------------------------------------------------------------------------------------------------------------------------------------------------------------------------------------------------------------------------------------------------------|
| NCDN   | neurochondrin                                           | This gene encodes a protein, which is highly similar to a mouse protein that negatively regulates Ca/calmodulin-dependent protein kinase II phosphorylation and may be essential for spatial learning processes.                                                                          |
| NF1    | neurofibromin 1                                         | This gene product appears to function as a negative regulator of the ras signal transduction pathway.                                                                                                                                                                                     |
| NFIX   | nuclear factor I/X (CCAAT-binding transcription factor) |                                                                                                                                                                                                                                                                                           |
| NKX2-1 | NK2 homeobox 1                                          |                                                                                                                                                                                                                                                                                           |
| NOG    | noggin                                                  | This protein may have a principal role in creating morphogenic gradients, and in numerous developmental processes, such as neural tube fusion and joint formation.                                                                                                                        |
| NOS1   | nitric oxide synthase 1 (neuronal)                      | Nitric oxide is a reactive free radical which mediates neurotransmission and antimicrobial and antitumoral activities. Nitric oxide is synthesized from L-arginine by nitric oxide synthases. This gene encodes a nitric oxide synthase which is highly expressed in skeletal muscle.     |
| NOX4   | NADPH oxidase 4                                         | This protein is localized to non-phagocytic cells where it acts as an oxygen sensor and catalyzes the reduction of molecular oxygen to various reactive oxygen species (ROS). The functions of these include signal transduction, cell differentiation and tumor cell growth.             |
| NPY2R  | neuropeptide Y receptor Y2                              |                                                                                                                                                                                                                                                                                           |
| NR2F2  | nuclear receptor subfamily 2, group F, member 2         |                                                                                                                                                                                                                                                                                           |
| NRG1   | neuregulin 1                                            | This protein is a signaling protein that mediates cell-cell interactions and plays critical roles in the growth and development of multiple organ systems.                                                                                                                                |
| NRP2   | neuropilin 2                                            | The encoded transmembrane protein binds to SEMA3C protein and SEMA3F protein, and interacts with vascular endothelial growth factor (VEGF). This protein may play a role in cardiovascular development, axon guidance, and tumorigenesis.                                                 |
| NRTN   | neurturin                                               | Neurturin is a member of the TGF-beta subfamily, TRN. This gene signals through RET and a GPI-linked coreceptor, and promotes survival of neuronal populations.                                                                                                                           |
| NTRK2  | neurotrophic tyrosine kinase, receptor, type 2          | This kinase is a membrane-bound receptor that, upon neurotrophin binding, phosphorylates itself and members of the MAPK pathway. Signalling through this kinase leads to cell differentiation.                                                                                            |
| NTRK3  | neurotrophic tyrosine kinase, receptor, type 3          | This kinase is a membrane-bound receptor that, upon neurotrophin binding, phosphorylates itself and members of the MAPK pathway. Signalling through this kinase leads to cell differentiation and may play a role in the development of proprioceptive neurons that sense body position.  |
| NUP133 | nucleoporin 133kDa                                      | The nucleoporin protein encoded by this gene localizes to both sides of the nuclear pore complex at interphase, remains associated with the complex during mitosis and is targeted at early stages to the reforming nuclear envelope. It also localizes to kinetochores of mitotic cells. |
| PAX2   | paired box 2                                            | PAX2 is believed to be a target of transcriptional suppression by the tumor suppressor gene WT1.                                                                                                                                                                                          |
| PAX3   | paired box 3                                            | Members of the PAX family play critical roles during fetal development.                                                                                                                                                                                                                   |
| PAX8   | paired box 8                                            | This nuclear protein is involved in thyroid follicular cell development and expression of thyroid-specific genes.                                                                                                                                                                         |
| PCDH15 | protocadherin 15                                        | This gene encodes an integral membrane protein that mediates calcium-dependent cell-cell adhesion. It plays an essential role in maintenance of normal retinal and cochlear function.                                                                                                     |

|        |                                                                                                 |                                                                                                                                                                                                                                                                                                                                                                                                               |
|--------|-------------------------------------------------------------------------------------------------|---------------------------------------------------------------------------------------------------------------------------------------------------------------------------------------------------------------------------------------------------------------------------------------------------------------------------------------------------------------------------------------------------------------|
| PCGF2  | polycomb group ring finger 2                                                                    | This protein was shown to act as a negative regulator of transcription and has tumor suppressor activity. It may negatively regulate the expression of different cytokines, chemokines, and chemokine receptors, and thus plays an important role in lymphocyte differentiation and migration, as well as in immune responses.                                                                                |
| PDGFB  | platelet-derived growth factor beta polypeptide (simian sarcoma viral (v-sis) oncogene homolog) | The protein encoded by this gene is a member of the platelet-derived growth factor family. The four members of this family are mitogenic factors for cells of mesenchymal origin and are characterized by a motif of eight cysteines.                                                                                                                                                                         |
| PDK4   | pyruvate dehydrogenase kinase, isozyme 4                                                        | This protein is located in the matrix of the mitochondria and inhibits the pyruvate dehydrogenase complex by phosphorylating one of its subunits, thereby contributing to the regulation of glucose metabolism. Expression of this gene is regulated by glucocorticoids, retinoic acid and insulin.                                                                                                           |
| PEG3   | paternally expressed 3                                                                          |                                                                                                                                                                                                                                                                                                                                                                                                               |
| PLN    | phospholamban                                                                                   | This protein is a major substrate for the cAMP-dependent protein kinase in cardiac muscle. It is an inhibitor of cardiac muscle sarcoplasmic reticulum Ca(2+)-ATPase in the unphosphorylated state, but inhibition is relieved upon phosphorylation. It is a key regulator of cardiac diastolic function.                                                                                                     |
| POU3F1 | POU class 3 homeobox 1                                                                          |                                                                                                                                                                                                                                                                                                                                                                                                               |
| POU6F1 | POU class 6 homeobox 1                                                                          |                                                                                                                                                                                                                                                                                                                                                                                                               |
| PRKACB | protein kinase, cAMP-dependent, catalytic, beta                                                 | The protein encoded by this gene is a member of the Ser/Thr protein kinase family and is a catalytic subunit of cAMP-dependent protein kinase.                                                                                                                                                                                                                                                                |
| PRKG2  | protein kinase, cGMP-dependent, type II                                                         |                                                                                                                                                                                                                                                                                                                                                                                                               |
| PROX1  | prospero homeobox 1                                                                             |                                                                                                                                                                                                                                                                                                                                                                                                               |
| PRRX1  | paired related homeobox 1                                                                       | This protein functions as a transcription co-activator, enhancing the DNA-binding activity of serum response factor, a protein required for the induction of genes by growth and differentiation factors. The protein regulates muscle creatine kinase, indicating a role in the establishment of diverse mesodermal muscle types.                                                                            |
| PRRX2  | paired related homeobox 2                                                                       | Expression is localized to proliferating fetal fibroblasts and the developing dermal layer, with downregulated expression in adult skin. The expression patterns provide evidence consistent with a role in fetal skin development and a possible role in cellular proliferation.                                                                                                                             |
| PTCH1  | patched homolog 1 (Drosophila)                                                                  | The encoded protein is the receptor for sonic hedgehog, a secreted molecule implicated in the formation of embryonic structures and in tumorigenesis, as well as the desert hedgehog and indian hedgehog proteins. This gene functions as a tumor suppressor.                                                                                                                                                 |
| PTEN   | phosphatase and tensin homolog                                                                  | This protein preferentially dephosphorylates phosphoinositide substrates. It negatively regulates intracellular levels of phosphatidylinositol-3,4,5-trisphosphate in cells and functions as a tumor suppressor by negatively regulating AKT/PKB signaling pathway.                                                                                                                                           |
| PTH1LH | parathyroid hormone-like hormone                                                                | This hormone regulates endochondral bone development and epithelial-mesenchymal interactions during the formation of the mammary glands and teeth. It is involved in lactation possibly by regulating the mobilization and transfer of calcium to the milk.                                                                                                                                                   |
| PTPRB  | protein tyrosine phosphatase, receptor type, B                                                  | The extracellular region of this PTP interacts with neuronal receptor and cell adhesion molecules, such as contactin and tenascin C. It also interacts with sodium channels, and may regulate sodium channels by altering tyrosine phosphorylation. The functions of the interaction partners of this protein implicate the roles of this PTP in cell adhesion, neurite growth, and neuronal differentiation. |

|         |                                                                        |                                                                                                                                                                                                                                                   |
|---------|------------------------------------------------------------------------|---------------------------------------------------------------------------------------------------------------------------------------------------------------------------------------------------------------------------------------------------|
| PYY     | peptide YY                                                             |                                                                                                                                                                                                                                                   |
| RAB7A   | RAB7A, member RAS oncogene family                                      | This gene encodes a RAB family member that regulates vesicle traffic in the late endosomes and also from late endosomes to lysosomes.                                                                                                             |
| RBL1    | retinoblastoma-like 1 (p107)                                           | It is thought that, given the homology to the known tumor suppressor RB1, the protein encoded by this gene may also be a tumor suppressor.                                                                                                        |
| RBPJ    | recombination signal binding protein for immunoglobulin kappa J region |                                                                                                                                                                                                                                                   |
| ROBO2   | roundabout, axon guidance receptor, homolog 2 (Drosophila)             | The encoded protein is a receptor for SLIT2, molecules known to function in axon guidance and cell migration.                                                                                                                                     |
| ROR2    | receptor tyrosine kinase-like orphan receptor 2                        | The protein may be involved in the early formation of the chondrocytes and may be required for cartilage and growth plate development.                                                                                                            |
| RUNX2   | runt-related transcription factor 2                                    | This protein is essential for osteoblastic differentiation and skeletal morphogenesis and acts as a scaffold for nucleic acids and regulatory factors involved in skeletal gene expression.                                                       |
| RYK     | RYK receptor-like tyrosine kinase                                      | The protein encoded by this gene is an atypical member of the family of growth factor receptor protein tyrosine kinases, differing from other members at a number of conserved residues in the activation and nucleotide binding domains.         |
| SALL1   | sal-like 1 (Drosophila)                                                | The protein encoded by this gene is a zinc finger transcriptional repressor and may be part of the NuRD histone deacetylase complex (HDAC).                                                                                                       |
| SGCD    | sarcoglycan, delta (35kDa dystrophin-associated glycoprotein)          | The protein encoded by this gene is one of the four known components of the sarcoglycan complex, which is a subcomplex of the dystrophin-glycoprotein complex (DGC). This protein is expressed most abundantly in skeletal and cardiac muscle.    |
| SIX2    | SIX homeobox 2                                                         | The encoded protein is a transcription factor which, like other members of this gene family, may be involved in limb or eye development.                                                                                                          |
| SLC34A1 | solute carrier family 34 (sodium phosphate), member 1                  |                                                                                                                                                                                                                                                   |
| SLURP1  | secreted LY6/PLAUR domain containing 1                                 | It is thought that this secreted protein contains antitumor activity.                                                                                                                                                                             |
| SMO     | smoothened homolog (Drosophila)                                        |                                                                                                                                                                                                                                                   |
| SMTN    | smoothelin                                                             | This gene encodes a structural protein that is found exclusively in contractile smooth muscle cells. It associates with stress fibers and constitutes part of the cytoskeleton.                                                                   |
| SNAI2   | snail homolog 2 (Drosophila)                                           | The encoded protein acts as a transcriptional repressor that binds to E-box motifs. This protein is involved in epithelial-mesenchymal transitions and has antiapoptotic activity.                                                                |
| SOX6    | SRY (sex determining region Y)-box 6                                   | This protein is a transcriptional activator is required for normal development of the CNS, chondrogenesis and maintenance of cardiac and skeletal muscle cells. It interacts with other family members to cooperatively activate gene expression. |
| SOX15   | SRY (sex determining region Y)-box 15                                  | This SOX family transcription factor is involved in the regulation of embryonic development and in the determination of the cell fate. It may act as a transcriptional regulator after forming a protein complex with other proteins.             |



|        |                                                                                                    |                                                                                                                                                                                                                                                                                                                                    |
|--------|----------------------------------------------------------------------------------------------------|------------------------------------------------------------------------------------------------------------------------------------------------------------------------------------------------------------------------------------------------------------------------------------------------------------------------------------|
| SPEG   | SPEG complex locus                                                                                 | Expression of this gene is thought to serve as a marker for differentiated vascular smooth muscle cells which may have a role in regulating growth and differentiation of this cell type.                                                                                                                                          |
| SRI    | sorcin                                                                                             |                                                                                                                                                                                                                                                                                                                                    |
| STC1   | stanniocalcin 1                                                                                    | This gene encodes a secreted, homodimeric glycoprotein that is expressed in a wide variety of tissues and may have autocrine or paracrine functions. The protein may play a role in the regulation of renal and intestinal calcium and phosphate transport, cell metabolism, or cellular calcium/phosphate homeostasis.            |
| STIL   | SCL/TAL1 interrupting locus                                                                        | This gene encodes a cytoplasmic protein implicated in regulation of the mitotic spindle checkpoint, a regulatory pathway that monitors chromosome segregation during cell division to ensure the proper distribution of chromosomes to daughter cells.                                                                             |
| STX2   | syntaxin 2                                                                                         | The product of this gene regulates epithelial-mesenchymal interactions and epithelial cell morphogenesis and activation.                                                                                                                                                                                                           |
| TBX5   | T-box 5                                                                                            | This protein may play a role in heart development and specification of limb identity.                                                                                                                                                                                                                                              |
| TCF4   | transcription factor 4                                                                             | This protein recognizes an Ephrussi-box ('E-box') binding site ('CANNTG') - a motif first identified in immunoglobulin enhancers. It is expressed predominantly in pre-B-cells, although it is found in other tissues as well.                                                                                                     |
| TCF12  | transcription factor 12                                                                            | This protein is expressed in many tissues, among them skeletal muscle, thymus, B- and T-cells, and may participate in regulating lineage-specific gene expression through the formation of heterodimers with other bHLH E-proteins.                                                                                                |
| TCF21  | transcription factor 21                                                                            | The TCF21 product is mesoderm specific, and expressed in embryonic epicardium, mesenchyme-derived tissues of lung, gut, gonad, and both mesenchymal and glomerular epithelial cells in the kidney.                                                                                                                                 |
| TCF7L2 | transcription factor 7-like 2 (T-cell specific, HMG-box)                                           | This protein has been implicated in blood glucose homeostasis. Genetic variants of this gene are associated with increased risk of type 2 diabetes.                                                                                                                                                                                |
| TEK    | TEK tyrosine kinase, endothelial                                                                   | The TEK receptor tyrosine kinase is expressed almost exclusively in endothelial cells, and its ligand is angiopoietin-1. The TEK signaling pathway appears to be critical for endothelial cell-smooth muscle cell communication in venous morphogenesis.                                                                           |
| TGFBR3 | transforming growth factor, beta receptor III                                                      | Transforming growth factor (TGF)-beta is a multifunctional cytokine that modulates several tissue development and repair processes, including cell differentiation, cell cycle progression, cellular migration, adhesion, and extracellular matrix production.                                                                     |
| THBS2  | thrombospondin 2                                                                                   | This protein mediates cell-to-cell and cell-to-matrix interactions. It has been shown to function as a potent inhibitor of tumor growth and angiogenesis. Studies of the mouse counterpart suggest that this protein may modulate the cell surface properties of mesenchymal cells and be involved in cell adhesion and migration. |
| THRB   | thyroid hormone receptor, beta (erythroblastic leukemia viral (v-erb-a) oncogene homolog 2, avian) | The protein encoded by this gene is a nuclear hormone receptor for triiodothyronine. It is one of the several receptors for thyroid hormone, and has been shown to mediate the biological activities of thyroid hormone.                                                                                                           |
| TINAG  | tubulointerstitial nephritis antigen                                                               | TINAG is a basement membrane glycoprotein initially identified as a target of antibodies in some forms of immunologically mediated tubulointerstitial nephritis.                                                                                                                                                                   |
| TP63   | tumor protein p63                                                                                  | This protein plays a role in the development and maintenance of stratified epithelial tissues. p63 <sup>-/-</sup> mice have several developmental defects which include the lack of limbs and other tissues, such as teeth and mammary glands, which develop as a result of interactions between mesenchyme and epithelium.        |

|                                                                      |          |                                                      |                                                                                                                                                                                                                                                                                                                         |
|----------------------------------------------------------------------|----------|------------------------------------------------------|-------------------------------------------------------------------------------------------------------------------------------------------------------------------------------------------------------------------------------------------------------------------------------------------------------------------------|
|                                                                      | TRIO     | triple functional domain (PTPRF interacting)         |                                                                                                                                                                                                                                                                                                                         |
|                                                                      | TTN      | titin                                                | This gene encodes a large abundant protein of striated muscle. Titin also contains binding sites for muscle associated proteins so it serves as an adhesion template for the assembly of contractile machinery in muscle cells. It has also been identified as a structural protein for chromosomes.                    |
|                                                                      | VSX1     | visual system homeobox 1                             | The encoded protein may regulate expression of the cone opsin genes early in development.                                                                                                                                                                                                                               |
|                                                                      | WT1      | Wilms tumor 1                                        | This protein has an essential role in the normal development of the urogenital system, and it is mutated in a small subset of patients with Wilm's tumors.                                                                                                                                                              |
|                                                                      | ZFPM2    | zinc finger protein, multitype 2                     | Proteins which modulate the activity of GATA family proteins are important regulators of hematopoiesis and cardiogenesis. This protein can both activate and down-regulate expression of GATA-target genes.                                                                                                             |
|                                                                      | ZIC2     | Zic family member 2 (odd-paired homolog, Drosophila) | This protein functions as a transcriptional repressor and may regulate tissue specific expression of dopamine receptor D1.                                                                                                                                                                                              |
|                                                                      | ZIC3     | Zic family member 3 (odd-paired homolog, Drosophila) | This nuclear protein probably functions as a transcription factor in early stages of left-right body axis formation.                                                                                                                                                                                                    |
| <hr/>                                                                |          |                                                      |                                                                                                                                                                                                                                                                                                                         |
| Tissue Development:<br>Growth: Growth of Metatarsal Bone (3.56E-03)  | FGF2     | fibroblast growth factor 2 (basic)                   | The CUG-initiated isoforms of this gene are localized in the nucleus and are responsible for the intracrine effect, whereas, the AUG-initiated form is mostly cytosolic and is responsible for the paracrine and autocrine effects of this FGF.                                                                         |
|                                                                      | IGF1     | insulin-like growth factor 1 (somatomedin C)         | The protein encoded by this gene is similar to insulin in function and structure and is a member of a family of proteins involved in mediating growth and development.                                                                                                                                                  |
|                                                                      | NOG      | noggin                                               | This protein may have a principal role in creating morphogenic gradients, and in numerous developmental processes, such as neural tube fusion and joint formation.                                                                                                                                                      |
|                                                                      | STC1     | stanniocalcin 1                                      | This gene encodes a secreted, homodimeric glycoprotein that is expressed in a wide variety of tissues and may have autocrine or paracrine functions. The protein may play a role in the regulation of renal and intestinal calcium and phosphate transport, cell metabolism, or cellular calcium/phosphate homeostasis. |
| <hr/>                                                                |          |                                                      |                                                                                                                                                                                                                                                                                                                         |
| Tissue Development:<br>Growth: Growth of Nervous Tissue (4.86E-03)   | IGF1     | insulin-like growth factor 1 (somatomedin C)         | The protein encoded by this gene is similar to insulin in function and structure and is a member of a family of proteins involved in mediating growth and development.                                                                                                                                                  |
|                                                                      | NF1      | neurofibromin 1                                      | This gene product appears to function as a negative regulator of the ras signal transduction pathway.                                                                                                                                                                                                                   |
|                                                                      | NRG1     | neuregulin 1                                         | This protein is a signaling protein that mediates cell-cell interactions and plays critical roles in the growth and development of multiple organ systems.                                                                                                                                                              |
| <hr/>                                                                |          |                                                      |                                                                                                                                                                                                                                                                                                                         |
| Tissue Development:<br>Myelination: Myelination of Nerves (4.51E-03) | B4GALNT1 | beta-1,4-N-acetyl-galactosaminyl transferase 1       | GalNAc-T is the enzyme involved in the biosynthesis of G(M2) and G(D2) glycosphingolipids. GalNAc-T catalyzes the transfer of GalNAc into G(M3) and G(D3) by a beta-1,4 linkage, resulting in the synthesis of G(M2) and G(D2), respectively.                                                                           |
|                                                                      | BACE1    | beta-site APP-cleaving enzyme 1                      | The encoded protein, a member of the peptidase A1 protein family, is a type I integral membrane glycoprotein and aspartic protease that is found mainly in the Golgi.                                                                                                                                                   |

|                                                                             |        |                                                                                                    |                                                                                                                                                                                                                                                                                          |
|-----------------------------------------------------------------------------|--------|----------------------------------------------------------------------------------------------------|------------------------------------------------------------------------------------------------------------------------------------------------------------------------------------------------------------------------------------------------------------------------------------------|
|                                                                             | MYO5A  | myosin VA (heavy chain 12, myoxin)                                                                 | Myosin V is a class of actin-based motor proteins involved in cytoplasmic vesicle transport and anchorage, spindle-pole alignment and mRNA translocation. The protein encoded by this gene is abundant in melanocytes and nerve cells.                                                   |
|                                                                             | NTRK2  | neurotrophic tyrosine kinase, receptor, type 2                                                     | This kinase is a membrane-bound receptor that, upon neurotrophin binding, phosphorylates itself and members of the MAPK pathway. Signalling through this kinase leads to cell differentiation.                                                                                           |
|                                                                             | NTRK3  | neurotrophic tyrosine kinase, receptor, type 3                                                     | This kinase is a membrane-bound receptor that, upon neurotrophin binding, phosphorylates itself and members of the MAPK pathway. Signalling through this kinase leads to cell differentiation and may play a role in the development of proprioceptive neurons that sense body position. |
|                                                                             | POU3F1 | POU class 3 homeobox 1                                                                             |                                                                                                                                                                                                                                                                                          |
|                                                                             | THRB   | thyroid hormone receptor, beta (erythroblastic leukemia viral (v-erb-a) oncogene homolog 2, avian) | The protein encoded by this gene is a nuclear hormone receptor for triiodothyronine. It is one of the several receptors for thyroid hormone, and has been shown to mediate the biological activities of thyroid hormone.                                                                 |
| <hr/>                                                                       |        |                                                                                                    |                                                                                                                                                                                                                                                                                          |
| Tissue Development:<br>Adhesion: Adhesion of<br>Muscle Cells (4.86E-03)     | ADAM12 | ADAM metalloproteinase domain 12                                                                   | This protein has been implicated in a variety of biological processes involving cell-cell and cell-matrix interactions, including fertilization, muscle development, and neurogenesis.                                                                                                   |
|                                                                             | ITGA9  | integrin, alpha 9                                                                                  | The protein encoded by this gene, when bound to the beta 1 chain, forms an integrin that is a receptor for VCAM1, cytotactin and osteopontin.                                                                                                                                            |
|                                                                             | ITGB1  | integrin, beta 1 (fibronectin receptor, beta polypeptide, antigen CD29 includes MDF2, MSK12)       | Integrin family members are membrane receptors involved in cell adhesion and recognition in a variety of processes including embryogenesis, hemostasis, tissue repair, immune response and metastatic diffusion of tumor cells.                                                          |
| <hr/>                                                                       |        |                                                                                                    |                                                                                                                                                                                                                                                                                          |
| Tissue Development:<br>Adhesion: Adhesion of<br>Beta Islet Cells (9.23E-03) | FGF1   | fibroblast growth factor 1 (acidic)                                                                | This protein functions as a modifier of endothelial cell migration and proliferation, as well as an angiogenic factor. It acts as a mitogen for a variety of mesoderm- and neuroectoderm-derived cells in vitro, thus is thought to be involved in organogenesis.                        |
|                                                                             | FGF2   | fibroblast growth factor 2 (basic)                                                                 | The CUG-initiated isoforms of this gene are localized in the nucleus and are responsible for the intracrine effect, whereas, the AUG-initiated form is mostly cytosolic and is responsible for the paracrine and autocrine effects of this FGF.                                          |
|                                                                             | ITGB1  | integrin, beta 1 (fibronectin receptor, beta polypeptide, antigen CD29 includes MDF2, MSK12)       | Integrin family members are membrane receptors involved in cell adhesion and recognition in a variety of processes including embryogenesis, hemostasis, tissue repair, immune response and metastatic diffusion of tumor cells.                                                          |
|                                                                             | NCAM1  | neural cell adhesion molecule 1                                                                    |                                                                                                                                                                                                                                                                                          |

Tissue Development:  
 Formation: Formation of  
 Tissue (7.44E-03)  
*Including* Formation of  
 Cortical Bone (4.86E-03),  
 Formation of Mammary  
 Placode 3 (4.86E-03),  
 Formation of Connective  
 Tissue (4.89E-03),  
 Formation of Bone  
 (4.97E-03), Formation of  
 Trabecular Bone (9.60E-  
 03)

|          |                                                    |                                                                                                                                                                                                                                                                   |
|----------|----------------------------------------------------|-------------------------------------------------------------------------------------------------------------------------------------------------------------------------------------------------------------------------------------------------------------------|
| ADAM12   | ADAM metallopeptidase domain 12                    | This protein has been implicated in a variety of biological processes involving cell-cell and cell-matrix interactions, including fertilization, muscle development, and neurogenesis.                                                                            |
| ARHGAP24 | Rho GTPase activating protein 24                   | ARHGAPs, such as ARHGAP24, encode negative regulators of Rho GTPases (see ARHA; MIM 165390), which are implicated in actin remodeling, cell polarity, and cell migration.                                                                                         |
| BMP7     | bone morphogenetic protein 7                       | Based on its expression early in embryogenesis, the BMP encoded by this gene has a proposed role in early development and possible bone inductive activity.                                                                                                       |
| BMPR1B   | bone morphogenetic protein receptor, type IB       | The ligands of this receptor are BMPs, which are members of the TGF-beta superfamily. BMPs are involved in endochondral bone formation and embryogenesis.                                                                                                         |
| CBX2     | chromobox homolog 2 (Pc class homolog, Drosophila) |                                                                                                                                                                                                                                                                   |
| CEBPA    | CCAAT/enhancer binding protein (C/EBP), alpha      | The encoded protein has been shown to bind to the promoter and modulate the expression of the gene encoding leptin, a protein that plays an important role in body weight homeostasis.                                                                            |
| DCN      | decorin                                            | This protein is a component of connective tissue, plays a role in matrix assembly and is capable of suppressing the growth of various tumor cell lines.                                                                                                           |
| DLL3     | delta-like 3 (Drosophila)                          | This gene encodes a member of the delta protein ligand family. This family functions as Notch ligands that are characterized by a DSL domain, EGF repeats, and a transmembrane domain.                                                                            |
| DMP1     | dentin matrix acidic phosphoprotein 1              | This protein, which is critical for proper mineralization of bone and dentin, is present in diverse cells of bone and tooth tissues.                                                                                                                              |
| EDNRA    | endothelin receptor type A                         |                                                                                                                                                                                                                                                                   |
| ESR1     | estrogen receptor 1                                | This gene encodes an estrogen receptor which are essential for sexual development and reproductive function, but also play a role in other tissues such as bone.                                                                                                  |
| FEN1     | flap structure-specific endonuclease 1             | The protein encoded by this gene removes 5' overhanging flaps in DNA repair and processes the 5' ends of Okazaki fragments in lagging strand DNA synthesis.                                                                                                       |
| FGF1     | fibroblast growth factor 1 (acidic)                | This protein functions as a modifier of endothelial cell migration and proliferation, as well as an angiogenic factor. It acts as a mitogen for a variety of mesoderm- and neuroectoderm-derived cells in vitro, thus is thought to be involved in organogenesis. |
| FGF2     | fibroblast growth factor 2 (basic)                 | The CUG-initiated isoforms of this gene are localized in the nucleus and are responsible for the intracrine effect, whereas, the AUG-initiated form is mostly cytosolic and is responsible for the paracrine and autocrine effects of this FGF.                   |

|        |                                                                                                          |                                                                                                                                                                                                                                                                                                                                                   |
|--------|----------------------------------------------------------------------------------------------------------|---------------------------------------------------------------------------------------------------------------------------------------------------------------------------------------------------------------------------------------------------------------------------------------------------------------------------------------------------|
| FGF4   | fibroblast growth factor 4                                                                               | This gene was identified by its oncogenic transforming activity. Studies on the mouse homolog suggested a function in bone morphogenesis and limb development through the sonic hedgehog (SHH) signaling pathway.                                                                                                                                 |
| FGF5   | fibroblast growth factor 5                                                                               | This gene was identified as an oncogene, which confers transforming potential when transfected into mammalian cells.                                                                                                                                                                                                                              |
| FGF7   | fibroblast growth factor 7 (keratinocyte growth factor)                                                  | This protein is an epithelial cell-specific growth factor, whose mitogenic activity is exhibited in keratinocytes but not in fibroblasts and endothelial cells. It may also be implicated roles in morphogenesis of epithelium, reepithelialization of wounds, hair development and early lung organogenesis.                                     |
| FGF10  | fibroblast growth factor 10                                                                              | This protein exhibits mitogenic activity for keratinizing epidermal cells, but essentially no activity for fibroblasts. It may be required for embryonic epidermal morphogenesis including brain development, lung morphogenesis, and initiation of limb bud formation. It is also implicated to be a primary factor in wound healing.            |
| FGF13  | fibroblast growth factor 13                                                                              | This gene is a possible candidate gene for familial cases of the BFLS, and for other syndromal and nonspecific forms of X-linked mental retardation, due to its chromosomal location.                                                                                                                                                             |
| FGFR2  | fibroblast growth factor receptor 2                                                                      | The extracellular portion of this protein interacts with fibroblast growth factors, setting in motion a cascade of downstream signals, ultimately influencing mitogenesis and differentiation.                                                                                                                                                    |
| FLT1   | fms-related tyrosine kinase 1 (vascular endothelial growth factor/vascular permeability factor receptor) | This protein binds to VEGFR-A, VEGFR-B and placental growth factor and plays an important role in angiogenesis and vasculogenesis. Expression of this receptor is found in vascular endothelial cells, placental trophoblast cells and peripheral blood monocytes.                                                                                |
| FN1    | fibronectin 1                                                                                            | Fibronectin is involved in cell adhesion and migration processes including embryogenesis, wound healing, blood coagulation, host defense, and metastasis.                                                                                                                                                                                         |
| FOXA2  | forkhead box A2                                                                                          | These hepatocyte nuclear factors are transcriptional activators for liver-specific genes such as albumin and transthyretin, and they also interact with chromatin. Similar family members have roles in the regulation of metabolism and in the differentiation of the pancreas and liver.                                                        |
| HAS2   | hyaluronan synthase 2                                                                                    | The functions of this protein include space filling, lubrication of joints, and provision of a matrix through which cells can migrate. It is actively produced during wound healing and tissue repair to provide a framework for ingrowth of blood vessels and fibroblasts.                                                                       |
| HGF    | hepatocyte growth factor (hepatopoietin A; scatter factor)                                               | Hepatocyte growth factor regulates cell growth, cell motility, and morphogenesis by activating a tyrosine kinase signaling cascade after binding to the proto-oncogenic c-Met receptor. Its ability to stimulate mitogenesis, cell motility, and matrix invasion gives it a central role in angiogenesis, tumorigenesis, and tissue regeneration. |
| HOXA2  | homeobox A2                                                                                              | This gene is a DNA-binding transcription factor which may regulate gene expression, morphogenesis, and differentiation. It may be involved in the placement of hindbrain segments in the proper location along the anterior-posterior axis during development.                                                                                    |
| HOXD3  | homeobox D3                                                                                              | The protein encoded by this gene may play a role in the regulation of cell adhesion processes.                                                                                                                                                                                                                                                    |
| IGF1   | insulin-like growth factor 1 (somatomedin C)                                                             | The protein encoded by this gene is similar to insulin in function and structure and is a member of a family of proteins involved in mediating growth and development.                                                                                                                                                                            |
| IGFBP5 | insulin-like growth factor binding protein 5                                                             |                                                                                                                                                                                                                                                                                                                                                   |

|        |                                                                                              |                                                                                                                                                                                                                                                                                       |
|--------|----------------------------------------------------------------------------------------------|---------------------------------------------------------------------------------------------------------------------------------------------------------------------------------------------------------------------------------------------------------------------------------------|
| IHH    | Indian hedgehog homolog (Drosophila)                                                         |                                                                                                                                                                                                                                                                                       |
| IL11   | interleukin 11                                                                               | This cytokine is shown to stimulate the T-cell-dependent development of immunoglobulin-producing B cells. It is also found to support the proliferation of hematopoietic stem cells and megakaryocyte progenitor cells.                                                               |
| IL1RN  | interleukin 1 receptor antagonist                                                            | This protein inhibits the activities of interleukin 1, alpha (IL1A) and interleukin 1, beta (IL1B), and modulates a variety of interleukin 1 related immune and inflammatory responses.                                                                                               |
| ITGB1  | integrin, beta 1 (fibronectin receptor, beta polypeptide, antigen CD29 includes MDF2, MSK12) | Integrin family members are membrane receptors involved in cell adhesion and recognition in a variety of processes including embryogenesis, hemostasis, tissue repair, immune response and metastatic diffusion of tumor cells.                                                       |
| LEF1   | lymphoid enhancer-binding factor 1                                                           | LEF1 is a nuclear protein that is expressed in pre-B and T cells. It binds to a functionally important site in the T-cell receptor-alpha (TCRA; MIM 186880) enhancer and confers maximal enhancer activity.                                                                           |
| LHCGR  | luteinizing hormone/choriogonadotropin receptor                                              | This gene encodes the receptor for both luteinizing hormone and choriogonadotropin.                                                                                                                                                                                                   |
| LRP8   | low density lipoprotein receptor-related protein 8, apolipoprotein e receptor                | This apolipoprotein E receptor is involved in cellular recognition and internalization of these lipoproteins.                                                                                                                                                                         |
| MACF1  | microtubule-actin crosslinking factor 1                                                      | This protein stabilizes actin at sites where microtubules and microfilaments meet, and may function in microtubule dynamics to facilitate actin-microtubule interactions at the cell periphery and to couple the microtubule network to cellular junctions.                           |
| MYF6   | myogenic factor 6 (herculin)                                                                 |                                                                                                                                                                                                                                                                                       |
| NCAM1  | neural cell adhesion molecule 1                                                              |                                                                                                                                                                                                                                                                                       |
| NKX2-1 | NK2 homeobox 1                                                                               |                                                                                                                                                                                                                                                                                       |
| NOG    | noggin                                                                                       | This protein may have a principal role in creating morphogenic gradients, and in numerous developmental processes, such as neural tube fusion and joint formation.                                                                                                                    |
| NOS1   | nitric oxide synthase 1 (neuronal)                                                           | Nitric oxide is a reactive free radical which mediates neurotransmission and antimicrobial and antitumoral activities. Nitric oxide is synthesized from L-arginine by nitric oxide synthases. This gene encodes a nitric oxide synthase which is highly expressed in skeletal muscle. |
| NPY1R  | neuropeptide Y receptor Y1                                                                   | Neuropeptide Y exhibits a diverse range of important physiologic activities, including effects on psychomotor activity, food intake, regulation of central endocrine secretion, and potent vasoactive effects on the cardiovascular system.                                           |
| NPY2R  | neuropeptide Y receptor Y2                                                                   |                                                                                                                                                                                                                                                                                       |
| NRG1   | neuregulin 1                                                                                 | This protein is a signaling protein that mediates cell-cell interactions and plays critical roles in the growth and development of multiple organ systems.                                                                                                                            |
| PAX3   | paired box 3                                                                                 | Members of the PAX family play critical roles during fetal development.                                                                                                                                                                                                               |
| PTCH1  | patched homolog 1 (Drosophila)                                                               | The encoded protein is the receptor for sonic hedgehog, a secreted molecule implicated in the formation of embryonic structures and in tumorigenesis, as well as the desert hedgehog and indian hedgehog proteins. This gene functions as a tumor suppressor.                         |

|       |                                                            |                                                                                                                                                                                                                                                                                                                         |
|-------|------------------------------------------------------------|-------------------------------------------------------------------------------------------------------------------------------------------------------------------------------------------------------------------------------------------------------------------------------------------------------------------------|
| PTEN  | phosphatase and tensin homolog                             | This protein preferentially dephosphorylates phosphoinositide substrates. It negatively regulates intracellular levels of phosphatidylinositol-3,4,5-trisphosphate in cells and functions as a tumor suppressor by negatively regulating AKT/PKB signaling pathway.                                                     |
| PTH1H | parathyroid hormone-like hormone                           | This hormone regulates endochondral bone development and epithelial-mesenchymal interactions during the formation of the mammary glands and teeth. It is involved in lactation possibly by regulating the mobilization and transfer of calcium to the milk.                                                             |
| PTN   | pleiotrophin                                               |                                                                                                                                                                                                                                                                                                                         |
| RBL1  | retinoblastoma-like 1 (p107)                               | It is thought that, given the homology to the known tumor suppressor RB1, the protein encoded by this gene may also be a tumor suppressor.                                                                                                                                                                              |
| RECK  | reversion-inducing-cysteine-rich protein with kazal motifs | This membrane-anchored glycoprotein may serve as a negative regulator for matrix metalloproteinase-9, a key enzyme involved in tumor invasion and metastasis.                                                                                                                                                           |
| RGS4  | regulator of G-protein signaling 4                         | This protein negatively regulates signaling upstream or at the level of the heterotrimeric G protein and is localized in the cytoplasm.                                                                                                                                                                                 |
| RUNX2 | runt-related transcription factor 2                        | This protein is essential for osteoblastic differentiation and skeletal morphogenesis and acts as a scaffold for nucleic acids and regulatory factors involved in skeletal gene expression.                                                                                                                             |
| SELE  | selectin E                                                 | The protein encoded by this gene is found in cytokine-stimulated endothelial cells and is thought to be responsible for the accumulation of blood leukocytes at sites of inflammation by mediating the adhesion of cells to the vascular lining. It exhibits st                                                         |
| SOX2  | SRY (sex determining region Y)-box 2                       | This protein is required for stem-cell maintenance in the central nervous system, and also regulates gene expression in the stomach.                                                                                                                                                                                    |
| SOX6  | SRY (sex determining region Y)-box 6                       | This protein is a transcriptional activator is required for normal development of the CNS, chondrogenesis and maintenance of cardiac and skeletal muscle cells. It interacts with other family members to cooperatively activate gene expression.                                                                       |
| SOX8  | SRY (sex determining region Y)-box 8                       | This protein may act as a transcriptional activator after forming a protein complex with other proteins. This protein may be involved in brain development and function.                                                                                                                                                |
| STAB2 | stabilin 2                                                 | This gene encodes a large, transmembrane receptor protein which may function in angiogenesis, lymphocyte homing, cell adhesion, or receptor scavenging.                                                                                                                                                                 |
| STC1  | stanniocalcin 1                                            | This gene encodes a secreted, homodimeric glycoprotein that is expressed in a wide variety of tissues and may have autocrine or paracrine functions. The protein may play a role in the regulation of renal and intestinal calcium and phosphate transport, cell metabolism, or cellular calcium/phosphate homeostasis. |
| TBX5  | T-box 5                                                    | This protein may play a role in heart development and specification of limb identity.                                                                                                                                                                                                                                   |
| TINAG | tubulointerstitial nephritis antigen                       | TINAG is a basement membrane glycoprotein initially identified as a target of antibodies in some forms of immunologically mediated tubulointerstitial nephritis.                                                                                                                                                        |
| TRIO  | triple functional domain (PTPRF interacting)               |                                                                                                                                                                                                                                                                                                                         |
| WT1   | Wilms tumor 1                                              | This protein has an essential role in the normal development of the urogenital system, and it is mutated in a small subset of patients with Wilm's tumors.                                                                                                                                                              |

Tissue Development:  
Branching: Branching of  
Tissue (5.75E-03)

|      |                       |                                                                                                                                       |
|------|-----------------------|---------------------------------------------------------------------------------------------------------------------------------------|
| BCL2 | B-cell CLL/lymphoma 2 | This gene encodes an integral outer mitochondrial membrane protein that blocks the apoptotic death of some cells such as lymphocytes. |
|------|-----------------------|---------------------------------------------------------------------------------------------------------------------------------------|

|       |                                                                                              |                                                                                                                                                                                                                                                                                                                                                   |
|-------|----------------------------------------------------------------------------------------------|---------------------------------------------------------------------------------------------------------------------------------------------------------------------------------------------------------------------------------------------------------------------------------------------------------------------------------------------------|
| EYA1  | eyes absent homolog 1 (Drosophila)                                                           | The encoded protein may play a role in the developing kidney, branchial arches, eye, and ear.                                                                                                                                                                                                                                                     |
| FGF1  | fibroblast growth factor 1 (acidic)                                                          | This protein functions as a modifier of endothelial cell migration and proliferation, as well as an angiogenic factor. It acts as a mitogen for a variety of mesoderm- and neuroectoderm-derived cells in vitro, thus is thought to be involved in organogenesis.                                                                                 |
| FGF7  | fibroblast growth factor 7 (keratinocyte growth factor)                                      | This protein is an epithelial cell-specific growth factor, whose mitogenic activity is exhibited in keratinocytes but not in fibroblasts and endothelial cells. It may also be implicated roles in morphogenesis of epithelium, reepithelialization of wounds, hair development and early lung organogenesis.                                     |
| FGFR2 | fibroblast growth factor receptor 2                                                          | The extracellular portion of this protein interacts with fibroblast growth factors, setting in motion a cascade of downstream signals, ultimately influencing mitogenesis and differentiation.                                                                                                                                                    |
| GDNF  | glial cell derived neurotrophic factor                                                       | The recombinant form of this protein was shown to promote the survival and differentiation of dopaminergic neurons in culture, and was able to prevent apoptosis of motor neurons induced by axotomy.                                                                                                                                             |
| GLI3  | GLI family zinc finger 3                                                                     | The protein encoded by this gene localizes in the cytoplasm, activates patched Drosophila homolog (PTCH) gene expression and plays a role during embryogenesis.                                                                                                                                                                                   |
| HGF   | hepatocyte growth factor (hepapoietin A; scatter factor)                                     | Hepatocyte growth factor regulates cell growth, cell motility, and morphogenesis by activating a tyrosine kinase signaling cascade after binding to the proto-oncogenic c-Met receptor. Its ability to stimulate mitogenesis, cell motility, and matrix invasion gives it a central role in angiogenesis, tumorigenesis, and tissue regeneration. |
| ITGB1 | integrin, beta 1 (fibronectin receptor, beta polypeptide, antigen CD29 includes MDF2, MSK12) | Integrin family members are membrane receptors involved in cell adhesion and recognition in a variety of processes including embryogenesis, hemostasis, tissue repair, immune response and metastatic diffusion of tumor cells.                                                                                                                   |
| LAMA5 | laminin, alpha 5                                                                             | The protein encoded by this gene belongs to the alpha subfamily of laminin chains and is a major component of basement membranes.                                                                                                                                                                                                                 |
| NRG1  | neuregulin 1                                                                                 | This protein is a signaling protein that mediates cell-cell interactions and plays critical roles in the growth and development of multiple organ systems.                                                                                                                                                                                        |
| PAX2  | paired box 2                                                                                 | PAX2 is believed to be a target of transcriptional suppression by the tumor suppressor gene WT1.                                                                                                                                                                                                                                                  |
| PGF   | placental growth factor                                                                      |                                                                                                                                                                                                                                                                                                                                                   |
| TCF21 | transcription factor 21                                                                      | The TCF21 product is mesoderm specific, and expressed in embryonic epicardium, mesenchyme-derived tissues of lung, gut, gonad, and both mesenchymal and glomerular epithelial cells in the kidney.                                                                                                                                                |

Tissue Development;  
Morphogenesis:  
Morphogenesis of  
Epithelial Tissue (7.30E-03)

|       |                                     |                                                                                                                                                                                                    |
|-------|-------------------------------------|----------------------------------------------------------------------------------------------------------------------------------------------------------------------------------------------------|
| BMP7  | bone morphogenetic protein 7        | Based on its expression early in embryogenesis, the BMP encoded by this gene has a proposed role in early development and possible bone inductive activity.                                        |
| CRYGS | crystallin, gamma S                 | This gene encodes the most significant gamma-crystallin in adult eye lens tissue. Whether due to aging or mutations in specific genes, gamma-crystallins have been involved in cataract formation. |
| FGFR2 | fibroblast growth factor receptor 2 | The extracellular portion of this protein interacts with fibroblast growth factors, setting in motion a cascade of downstream signals, ultimately influencing mitogenesis and differentiation.     |



|        |                                                        |                                                                                                                                                                                                                                                                                                                                |
|--------|--------------------------------------------------------|--------------------------------------------------------------------------------------------------------------------------------------------------------------------------------------------------------------------------------------------------------------------------------------------------------------------------------|
| FOXA1  | forkhead box A1                                        | These hepatocyte nuclear factors are transcriptional activators for liver-specific transcripts such as albumin and transthyretin, and they also interact with chromatin. Similar family members in mice have roles in the regulation of metabolism and in the differentiation of the pancreas and liver.                       |
| FRAS1  | Fraser syndrome 1                                      | The FRAS1 gene encodes a putative extracellular matrix (ECM) protein and is mutated in Fraser syndrome (MIM 219000).                                                                                                                                                                                                           |
| FREM2  | FRAS1 related extracellular matrix protein 2           | This extracellular matrix protein is thought to be required for maintaining the integrity of the skin epithelium and the differentiated state of renal epithelia. The protein localizes to the basement membrane, forming a ternary complex that plays a role in epidermal-dermal interactions during morphogenetic processes. |
| GAB1   | GRB2-associated binding protein 1                      | The protein encoded by this gene is an important mediator of branching tubulogenesis and plays a central role in cellular growth response, transformation and apoptosis.                                                                                                                                                       |
| HOXB2  | homeobox B2                                            | The encoded protein functions as a sequence-specific transcription factor that is involved in development.                                                                                                                                                                                                                     |
| HOXB13 | homeobox B13                                           | This gene has been implicated to play a role in fetal skin development and cutaneous regeneration. Studies have exhibited temporal and spatial colinearity in the main body axis of the embryo, but it was not expressed in the secondary axes, which suggests functions in body patterning along the axis.                    |
| JAG2   | jagged 2                                               | Members of the Notch gene family encode transmembrane receptors that are critical for various cell fate decisions. The protein encoded by this gene is one of several ligands that activate Notch and related receptors.                                                                                                       |
| LAMA5  | laminin, alpha 5                                       | The protein encoded by this gene belongs to the alpha subfamily of laminin chains and is a major component of basement membranes.                                                                                                                                                                                              |
| MET    | met proto-oncogene (hepatocyte growth factor receptor) | The proto-oncogene MET product is the hepatocyte growth factor receptor and encodes tyrosine-kinase activity.                                                                                                                                                                                                                  |
| PCDH15 | protocadherin 15                                       | This gene encodes an integral membrane protein that mediates calcium-dependent cell-cell adhesion. It plays an essential role in maintenance of normal retinal and cochlear function.                                                                                                                                          |
| TBX5   | T-box 5                                                | This protein may play a role in heart development and specification of limb identity.                                                                                                                                                                                                                                          |

Tissue Development:  
 Angiogenesis:  
 Angiogenesis of  
 Extraembryonic Tissue  
 (1.00E-02)

|        |                                                 |                                                                                                                                                                                                                                                    |
|--------|-------------------------------------------------|----------------------------------------------------------------------------------------------------------------------------------------------------------------------------------------------------------------------------------------------------|
| ANGPT1 | angiopoietin 1                                  | This protein plays a role in mediating reciprocal interactions between the endothelium and surrounding matrix and mesenchyme. It also contributes to blood vessel maturation and stability, and may be involved in early development of the heart. |
| EDIL3  | EGF-like repeats and discoidin I-like domains 3 | The protein encoded by this gene is an integrin ligand. It plays an important role in mediating angiogenesis and may be important in vessel wall remodeling and development. It also influences endothelial cell behavior.                         |
| FGF2   | fibroblast growth factor 2 (basic)              | The CUG-initiated isoforms of this gene are localized in the nucleus and are responsible for the intracrine effect, whereas, the AUG-initiated form is mostly cytosolic and is responsible for the paracrine and autocrine effects of this FGF.    |
| FGF13  | fibroblast growth factor 13                     | This gene is a possible candidate gene for familial cases of the BFLS, and for other syndromal and nonspecific forms of X-linked mental retardation, due to its chromosomal location.                                                              |
| FN1    | fibronectin 1                                   | Fibronectin is involved in cell adhesion and migration processes including embryogenesis, wound healing, blood coagulation, host defense, and metastasis.                                                                                          |

|        |                                                          |                                                                                                                                                                                                                                                                                                                                                                                                               |
|--------|----------------------------------------------------------|---------------------------------------------------------------------------------------------------------------------------------------------------------------------------------------------------------------------------------------------------------------------------------------------------------------------------------------------------------------------------------------------------------------|
| HGF    | hepatocyte growth factor (hepapoietin A; scatter factor) | Hepatocyte growth factor regulates cell growth, cell motility, and morphogenesis by activating a tyrosine kinase signaling cascade after binding to the proto-oncogenic c-Met receptor. Its ability to stimulate mitogenesis, cell motility, and matrix invasion gives it a central role in angiogenesis, tumorigenesis, and tissue regeneration.                                                             |
| ITGA9  | integrin, alpha 9                                        | The protein encoded by this gene, when bound to the beta 1 chain, forms an integrin that is a receptor for VCAM1, cytactin and osteopontin.                                                                                                                                                                                                                                                                   |
| NRG1   | neuregulin 1                                             | This protein is a signaling protein that mediates cell-cell interactions and plays critical roles in the growth and development of multiple organ systems.                                                                                                                                                                                                                                                    |
| NRP2   | neuropilin 2                                             | The encoded transmembrane protein binds to SEMA3C protein and SEMA3F protein, and interacts with vascular endothelial growth factor (VEGF). This protein may play a role in cardiovascular development, axon guidance, and tumorigenesis.                                                                                                                                                                     |
| PTPRB  | protein tyrosine phosphatase, receptor type, B           | The extracellular region of this PTP interacts with neuronal receptor and cell adhesion molecules, such as contactin and tenascin C. It also interacts with sodium channels, and may regulate sodium channels by altering tyrosine phosphorylation. The functions of the interaction partners of this protein implicate the roles of this PTP in cell adhesion, neurite growth, and neuronal differentiation. |
| SLURP1 | secreted LY6/PLAUR domain containing 1                   | It is thought that this secreted protein contains antitumor activity.                                                                                                                                                                                                                                                                                                                                         |

Tissue Development:  
Differentiation of  
Epithelial Tissue (1.37E-02)

|        |                                                                                                    |                                                                                                                                                                                                                                                                                                                             |
|--------|----------------------------------------------------------------------------------------------------|-----------------------------------------------------------------------------------------------------------------------------------------------------------------------------------------------------------------------------------------------------------------------------------------------------------------------------|
| ADIPOQ | adiponectin, C1Q and collagen domain containing                                                    | This gene is expressed in adipose tissue exclusively. The encoded protein circulates in the plasma and is involved with metabolic and hormonal processes.                                                                                                                                                                   |
| AR     | androgen receptor                                                                                  | This protein functions as a steroid-hormone activated transcription factor.                                                                                                                                                                                                                                                 |
| FGF7   | fibroblast growth factor 7 (keratinocyte growth factor)                                            | This protein is an epithelial cell-specific growth factor, whose mitogenic activity is exhibited in keratinocytes but not in fibroblasts and endothelial cells. It may also be implicated roles in morphogenesis of epithelium, reepithelialization of wounds, hair development and early lung organogenesis.               |
| PAX2   | paired box 2                                                                                       | PAX2 is believed to be a target of transcriptional suppression by the tumor suppressor gene WT1.                                                                                                                                                                                                                            |
| THRB   | thyroid hormone receptor, beta (erythroblastic leukemia viral (v-erb-a) oncogene homolog 2, avian) | The protein encoded by this gene is a nuclear hormone receptor for triiodothyronine. It is one of the several receptors for thyroid hormone, and has been shown to mediate the biological activities of thyroid hormone.                                                                                                    |
| TP63   | tumor protein p63                                                                                  | This protein plays a role in the development and maintenance of stratified epithelial tissues. p63 <sup>-/-</sup> mice have several developmental defects which include the lack of limbs and other tissues, such as teeth and mammary glands, which develop as a result of interactions between mesenchyme and epithelium. |

Tissue Development:  
Aggregation:  
Aggregation of  
Thymocytes (1.70E-02)

|     |                                             |                                                                                                        |
|-----|---------------------------------------------|--------------------------------------------------------------------------------------------------------|
| LCK | lymphocyte-specific protein tyrosine kinase | The encoded protein is a key signaling molecule in the selection and maturation of developing T-cells. |
|-----|---------------------------------------------|--------------------------------------------------------------------------------------------------------|

|       |                                                        |                                                                                                                                             |
|-------|--------------------------------------------------------|---------------------------------------------------------------------------------------------------------------------------------------------|
| PLCB1 | phospholipase C, beta 1<br>(phosphoinositide-specific) | This protein encoded catalyzes the formation of inositol 1,4,5-trisphosphate and diacylglycerol from phosphatidylinositol 4,5-bisphosphate. |
| RAG1  | recombination activating gene<br>1                     | The protein encoded by this gene is involved in activation of immunoglobulin V-D-J recombination.                                           |

---

Organ Development:  
Development:  
Development of Organ  
(6.00E-6) *including*  
Development of Testis  
(1.47E-04), Development  
of Gonad (3.32E-04),  
Development of Brain  
(see also Category  
Nervous System  
Development and  
Function) (7.36E-04),  
Development of Heart  
(4.48E-03), Development  
of Prostate Gland (5.00E-  
03), Development of  
Metanephros (5.58E-03),  
Development of Kidney  
(6.58E-03), Development  
of Ovary (6.82E-03),  
Development of  
Forebrain (see also  
Category Nervous  
System Development  
and Function) (1.53E-  
02), Development of  
Lung (1.58E-02)

|        |                                                                  |                                                                                                                                                                                                        |
|--------|------------------------------------------------------------------|--------------------------------------------------------------------------------------------------------------------------------------------------------------------------------------------------------|
| ABI2   | abl interactor 2                                                 |                                                                                                                                                                                                        |
| ACADM  | acyl-Coenzyme A<br>dehydrogenase, C-4 to C-12<br>straight chain  | The homotetramer enzyme catalyzes the initial step of the mitochondrial fatty acid beta-oxidation pathway.                                                                                             |
| ACE    | angiotensin I converting<br>enzyme (peptidyl-dipeptidase<br>A) 1 | This gene encodes an enzyme involved in catalyzing the conversion of angiotensin I into a physiologically active peptide angiotensin II. This enzyme plays a key role in the renin-angiotensin system. |
| ADRA1A | adrenergic, alpha-1A-, receptor                                  | This gene activates mitogenic responses and regulates growth and proliferation of many cells.                                                                                                          |

|         |                                               |                                                                                                                                                                                                                                                                                                                                                                                                                                          |
|---------|-----------------------------------------------|------------------------------------------------------------------------------------------------------------------------------------------------------------------------------------------------------------------------------------------------------------------------------------------------------------------------------------------------------------------------------------------------------------------------------------------|
| AFF2    | AF4/FMR2 family, member 2                     |                                                                                                                                                                                                                                                                                                                                                                                                                                          |
| AGTR1   | angiotensin II receptor, type 1               | Angiotensin II is a potent vasopressor hormone and a primary regulator of aldosterone secretion. It is an important effector controlling blood pressure and volume in the cardiovascular system.                                                                                                                                                                                                                                         |
| AGTR2   | angiotensin II receptor, type 2               | AGTR2 plays a role in the central nervous system and cardiovascular functions that are mediated by the renin-angiotensin system. This receptor mediates programmed cell death (apoptosis).                                                                                                                                                                                                                                               |
| AKT2    | v-akt murine thymoma viral oncogene homolog 2 | This gene is a putative oncogene encoding a subfamily of serine/threonine kinases containing SH2-like (Src homology 2-like) domains. The encoded protein is a general protein kinase capable of phosphorylating several known proteins.                                                                                                                                                                                                  |
| ALDH1A3 | aldehyde dehydrogenase 1 family, member A3    | Aldehyde dehydrogenase isozymes are thought to play a major role in the detoxification of aldehydes generated by alcohol metabolism and lipid peroxidation.                                                                                                                                                                                                                                                                              |
| ANKRD7  | ankyrin repeat domain 7                       |                                                                                                                                                                                                                                                                                                                                                                                                                                          |
| AQP11   | aquaporin 11                                  |                                                                                                                                                                                                                                                                                                                                                                                                                                          |
| AR      | androgen receptor                             | This protein functions as a steroid-hormone activated transcription factor.                                                                                                                                                                                                                                                                                                                                                              |
| ARX     | aristaless related homeobox                   | This gene is a homeobox-containing gene expressed during development, and is thought to be involved in CNS development.                                                                                                                                                                                                                                                                                                                  |
| ATM     | ataxia telangiectasia mutated                 | This protein functions as a regulator of a wide variety of downstream proteins, including tumor suppressor proteins p53 and BRCA1, checkpoint kinase CHK2, checkpoint proteins RAD17 and RAD9, and DNA repair protein NBS1. This protein and the closely related kinase ATR are thought to be master controllers of cell cycle checkpoint signaling pathways that are required for cell response to DNA damage and for genome stability. |
| BCL2    | B-cell CLL/lymphoma 2                         | This gene encodes an integral outer mitochondrial membrane protein that blocks the apoptotic death of some cells such as lymphocytes.                                                                                                                                                                                                                                                                                                    |
| BCL11B  | B-cell CLL/lymphoma 11B (zinc finger protein) | The specific function of this gene has not yet been determined.                                                                                                                                                                                                                                                                                                                                                                          |
| BMP5    | bone morphogenetic protein 5                  | This protein may act as signaling molecule within the trabecular meshwork and optic nerve head, and may play a potential role in glaucoma pathogenesis. This gene is differentially regulated during the formation of various tumors.                                                                                                                                                                                                    |
| BMP7    | bone morphogenetic protein 7                  | Based on its expression early in embryogenesis, the BMP encoded by this gene has a proposed role in early development and possible bone inductive activity.                                                                                                                                                                                                                                                                              |
| BMP15   | bone morphogenetic protein 15                 | This protein may be involved in oocyte maturation and follicular development as a homodimer or by forming heterodimers with a related protein, Gdf9.                                                                                                                                                                                                                                                                                     |
| BMPR1B  | bone morphogenetic protein receptor, type IB  | The ligands of this receptor are BMPs, which are members of the TGF-beta superfamily. BMPs are involved in endochondral bone formation and embryogenesis.                                                                                                                                                                                                                                                                                |
| BMX     | BMX non-receptor tyrosine kinase              | One family of nonreceptor TKs includes the genes TEC (MIM 600583), TXK (MIM 600058), ITK (MIM 186973), and BTK (MIM 300300).                                                                                                                                                                                                                                                                                                             |
| CADM1   | cell adhesion molecule 1                      |                                                                                                                                                                                                                                                                                                                                                                                                                                          |
| CALCRL  | calcitonin receptor-like                      |                                                                                                                                                                                                                                                                                                                                                                                                                                          |
| CCKAR   | cholecystokinin A receptor                    | This receptor is a major physiologic mediator of pancreatic enzyme secretion and smooth muscle contraction of the gallbladder and stomach. In the central and peripheral nervous system this receptor regulates satiety and the release of beta-endorphin and dopamine.                                                                                                                                                                  |
| CCNB2   | cyclin B2                                     | Cyclin B2 plays in transforming growth factor beta-mediated cell cycle control.                                                                                                                                                                                                                                                                                                                                                          |

|          |                                                                                                   |                                                                                                                                                                                                                                                                                                                                                       |
|----------|---------------------------------------------------------------------------------------------------|-------------------------------------------------------------------------------------------------------------------------------------------------------------------------------------------------------------------------------------------------------------------------------------------------------------------------------------------------------|
| CDK5RAP2 | CDK5 regulatory subunit associated protein 2                                                      | This protein may be involved in neuronal differentiation.                                                                                                                                                                                                                                                                                             |
| CEBPA    | CCAAT/enhancer binding protein (C/EBP), alpha                                                     | The encoded protein has been shown to bind to the promoter and modulate the expression of the gene encoding leptin, a protein that plays an important role in body weight homeostasis.                                                                                                                                                                |
| CFTR     | cystic fibrosis transmembrane conductance regulator (ATP-binding cassette sub-family C, member 7) | The encoded protein functions as a chloride channel and controls the regulation of other transport pathways.                                                                                                                                                                                                                                          |
| CHD7     | chromodomain helicase DNA binding protein 7                                                       | This gene encodes a protein that contains several helicase family domains.                                                                                                                                                                                                                                                                            |
| COL11A1  | collagen, type XI, alpha 1                                                                        | This gene encodes one of the two alpha chains of type XI collagen, a minor fibrillar collagen. Type XI collagen is a heterotrimer but the third alpha chain is a post-translationally modified alpha 1 type II chain.                                                                                                                                 |
| COL3A1   | collagen, type III, alpha 1                                                                       | This gene encodes the pro-alpha1 chains of type III collagen, a fibrillar collagen that is found in extensible connective tissues such as skin, lung, uterus, intestine and the vascular system.                                                                                                                                                      |
| COL5A1   | collagen, type V, alpha 1                                                                         | Type V collagen appears to regulate the assembly of heterotypic fibers composed of both type I and type V collagen.                                                                                                                                                                                                                                   |
| CRH      | corticotropin releasing hormone                                                                   | CRH is secreted by the paraventricular nucleus (PVN) of the hypothalamus in response to stress. In the placenta CRH is a marker that determines the length of gestation and the timing of parturition and delivery. CRH may also act as a trigger for parturition.                                                                                    |
| CRYGB    | crystallin, gamma B                                                                               | Whether due to aging or mutations in specific genes, gamma-crystallins have been involved in cataract formation.                                                                                                                                                                                                                                      |
| CSF3     | colony stimulating factor 3 (granulocyte)                                                         | The protein encoded by this gene is a cytokine that controls the production, differentiation, and function of granulocytes.                                                                                                                                                                                                                           |
| CTNNA2   | catenin (cadherin-associated protein), alpha 2                                                    |                                                                                                                                                                                                                                                                                                                                                       |
| CYP19A1  | cytochrome P450, family 19, subfamily A, polypeptide 1                                            | This protein localizes to the endoplasmic reticulum and catalyzes the last steps of estrogen biosynthesis, three successive hydroxylations of the A ring of androgens.                                                                                                                                                                                |
| DCLK1    | doublecortin-like kinase 1                                                                        | DCAMKL1 is a microtubule-associated protein that phosphorylates itself and myelin basic protein (MBP; MIM 159430).                                                                                                                                                                                                                                    |
| DLC1     | deleted in liver cancer 1                                                                         | It is suggested that this gene is a candidate tumor suppressor gene for human liver cancer, as well as for prostate, lung, colorectal, and breast cancers.                                                                                                                                                                                            |
| DMRT2    | doublesex and mab-3 related transcription factor 2                                                |                                                                                                                                                                                                                                                                                                                                                       |
| E2F1     | E2F transcription factor 1                                                                        | The protein encoded by this gene is a member of the E2F family of transcription factors which plays a crucial role in the control of cell cycle and action of tumor suppressor proteins and is also a target of the transforming proteins of small DNA tumor viruses. It can mediate both cell proliferation and p53-dependent/independent apoptosis. |
| ECE2     | endothelin converting enzyme 2                                                                    | Endothelin-converting enzymes, such as ECE2 (EC 3.4.24.71), are type II metalloproteases that generate functionally pleiotropic members of the endothelin vasoactive peptide family.                                                                                                                                                                  |

|       |                                                                  |                                                                                                                                                                                                                                                                                                               |
|-------|------------------------------------------------------------------|---------------------------------------------------------------------------------------------------------------------------------------------------------------------------------------------------------------------------------------------------------------------------------------------------------------|
| EDA   | ectodysplasin A                                                  | The encoded protein, which belongs to the tumor necrosis factor family, acts as a homotrimer and may be involved in cell-cell signaling during the development of ectodermal organs.                                                                                                                          |
| EDNRA | endothelin receptor type A                                       |                                                                                                                                                                                                                                                                                                               |
| EDNRB | endothelin receptor type B                                       | The protein encoded by this gene is a G protein-coupled receptor which activates a phosphatidylinositol-calcium second messenger system.                                                                                                                                                                      |
| EMX2  | empty spiracles homeobox 2                                       | The homeodomain transcription factor EMX2 is critical for central nervous system and urogenital development.                                                                                                                                                                                                  |
| EPOR  | erythropoietin receptor                                          | This erythropoietin receptor activates Jak2 tyrosine kinase which activates different intracellular pathways including: Ras/MAP kinase, phosphatidylinositol 3-kinase and STAT transcription factors. The stimulated erythropoietin receptor appears to have a role in erythroid cell survival.               |
| ERBB4 | v-erb-a erythroblastic leukemia viral oncogene homolog 4 (avian) | This gene encodes a protein which binds to and is activated by neuregulins and other factors and induces a variety of cellular responses including mitogenesis and differentiation.                                                                                                                           |
| ESR1  | estrogen receptor 1                                              | This gene encodes an estrogen receptor which are essential for sexual development and reproductive function, but also play a role in other tissues such as bone.                                                                                                                                              |
| ESRRB | estrogen-related receptor beta                                   | This protein is similar to the estrogen receptor. Its function is unknown; however, a similar protein in mouse plays a key role in placental development.                                                                                                                                                     |
| EVI1  | ecotropic viral integration site 1                               |                                                                                                                                                                                                                                                                                                               |
| EYA1  | eyes absent homolog 1 (Drosophila)                               | The encoded protein may play a role in the developing kidney, branchial arches, eye, and ear.                                                                                                                                                                                                                 |
| FANCA | Fanconi anemia, complementation group A                          | Fanconi anemia complementation group members are related by assembly into a common nuclear protein complex.                                                                                                                                                                                                   |
| FBN1  | fibrillin 1                                                      | This protein is a structural component of 10-12 nm calcium-binding microfibrils, which provide force bearing structural support in elastic and nonelastic connective tissue throughout the body.                                                                                                              |
| FBXW8 | F-box and WD repeat domain containing 8                          | The F-box proteins constitute one of the four subunits of ubiquitin protein ligase complex called SCFs (SKP1-cullin-F-box), which function in phosphorylation-dependent ubiquitination.                                                                                                                       |
| FGF1  | fibroblast growth factor 1 (acidic)                              | This protein functions as a modifier of endothelial cell migration and proliferation, as well as an angiogenic factor. It acts as a mitogen for a variety of mesoderm- and neuroectoderm-derived cells in vitro, thus is thought to be involved in organogenesis.                                             |
| FGF2  | fibroblast growth factor 2 (basic)                               | The CUG-initiated isoforms of this gene are localized in the nucleus and are responsible for the intracrine effect, whereas, the AUG-initiated form is mostly cytosolic and is responsible for the paracrine and autocrine effects of this FGF.                                                               |
| FGF4  | fibroblast growth factor 4                                       | This gene was identified by its oncogenic transforming activity. Studies on the mouse homolog suggested a function in bone morphogenesis and limb development through the sonic hedgehog (SHH) signaling pathway.                                                                                             |
| FGF7  | fibroblast growth factor 7 (keratinocyte growth factor)          | This protein is an epithelial cell-specific growth factor, whose mitogenic activity is exhibited in keratinocytes but not in fibroblasts and endothelial cells. It may also be implicated roles in morphogenesis of epithelium, reepithelialization of wounds, hair development and early lung organogenesis. |

|       |                                        |                                                                                                                                                                                                                                                                                                                                        |
|-------|----------------------------------------|----------------------------------------------------------------------------------------------------------------------------------------------------------------------------------------------------------------------------------------------------------------------------------------------------------------------------------------|
| FGF10 | fibroblast growth factor 10            | This protein exhibits mitogenic activity for keratinizing epidermal cells, but essentially no activity for fibroblasts. It may be required for embryonic epidermal morphogenesis including brain development, lung morphogenesis, and initiation of limb bud formation. It is also implicated to be a primary factor in wound healing. |
| FGF18 | fibroblast growth factor 18            | This protein may be a pleiotropic growth factor that stimulates proliferation in many tissues, notably the liver and small intestine. Knockout studies in mice implied its role in regulating proliferation and differentiation of midline cerebellar structures.                                                                      |
| FGFR2 | fibroblast growth factor receptor 2    | The extracellular portion of this protein interacts with fibroblast growth factors, setting in motion a cascade of downstream signals, ultimately influencing mitogenesis and differentiation.                                                                                                                                         |
| FN1   | fibronectin 1                          | Fibronectin is involved in cell adhesion and migration processes including embryogenesis, wound healing, blood coagulation, host defense, and metastasis.                                                                                                                                                                              |
| FOXA1 | forkhead box A1                        | These hepatocyte nuclear factors are transcriptional activators for liver-specific transcripts such as albumin and transthyretin, and they also interact with chromatin. Similar family members in mice have roles in the regulation of metabolism and in the differentiation of the pancreas and liver.                               |
| FOXA2 | forkhead box A2                        | These hepatocyte nuclear factors are transcriptional activators for liver-specific genes such as albumin and transthyretin, and they also interact with chromatin. Similar family members have roles in the regulation of metabolism and in the differentiation of the pancreas and liver.                                             |
| FRAS1 | Fraser syndrome 1                      | The FRAS1 gene encodes a putative extracellular matrix (ECM) protein and is mutated in Fraser syndrome (MIM 219000).                                                                                                                                                                                                                   |
| FZD4  | frizzled homolog 4 (Drosophila)        | This protein may play a role as a positive regulator of the Wingless type MMTV integration site signaling pathway.                                                                                                                                                                                                                     |
| GATA4 | GATA binding protein 4                 | This protein is thought to regulate genes involved in embryogenesis and in myocardial differentiation and function.                                                                                                                                                                                                                    |
| GDF9  | growth differentiation factor 9        | Growth differentiation factor-9 (GDF9) is expressed in oocytes and is thought to be required for ovarian folliculogenesis.                                                                                                                                                                                                             |
| GDNF  | glial cell derived neurotrophic factor | The recombinant form of this protein was shown to promote the survival and differentiation of dopaminergic neurons in culture, and was able to prevent apoptosis of motor neurons induced by axotomy.                                                                                                                                  |
| GJB6  | gap junction protein, beta 6, 30kDa    | This gene encodes one of the connexin proteins.                                                                                                                                                                                                                                                                                        |
| GJC1  | gap junction protein, gamma 1, 45kDa   | The encoded protein is a component of gap junctions, which are composed of arrays of intercellular channels that provide a route for the diffusion of low molecular weight materials from cell to cell.                                                                                                                                |
| GLI3  | GLI family zinc finger 3               | The protein encoded by this gene localizes in the cytoplasm, activates patched Drosophila homolog (PTCH) gene expression and plays a role during embryogenesis.                                                                                                                                                                        |
| HAS2  | hyaluronan synthase 2                  | The functions of this protein include space filling, lubrication of joints, and provision of a matrix through which cells can migrate. It is actively produced during wound healing and tissue repair to provide a framework for ingrowth of blood vessels and fibroblasts.                                                            |
| HDAC9 | histone deacetylase 9                  | Histone acetylation/deacetylation alters chromosome structure and affects transcription factor access to DNA. The protein encoded by this gene has sequence homology to members of the histone deacetylase family. This encoded protein may play a role in hematopoiesis.                                                              |

|         |                                                                        |                                                                                                                                                                                                                                                                                                                                                   |
|---------|------------------------------------------------------------------------|---------------------------------------------------------------------------------------------------------------------------------------------------------------------------------------------------------------------------------------------------------------------------------------------------------------------------------------------------|
| HES1    | hairy and enhancer of split 1, (Drosophila)                            | It is a transcriptional repressor of genes that require a bHLH protein for their transcription. The protein has a particular type of basic domain that contains a helix interrupting protein that binds to the N-box rather than the canonical E-box.                                                                                             |
| HESX1   | HESX homeobox 1                                                        | This gene encodes a conserved homeobox protein that is a transcriptional repressor in the developing forebrain and pituitary gland.                                                                                                                                                                                                               |
| HGF     | hepatocyte growth factor (hepapoietin A; scatter factor)               | Hepatocyte growth factor regulates cell growth, cell motility, and morphogenesis by activating a tyrosine kinase signaling cascade after binding to the proto-oncogenic c-Met receptor. Its ability to stimulate mitogenesis, cell motility, and matrix invasion gives it a central role in angiogenesis, tumorigenesis, and tissue regeneration. |
| HHIP    | hedgehog interacting protein                                           | This protein similar to the mouse hedgehog-interacting protein, which is involved in many fundamental processes in embryonic development, including anteroposterior patterns of limbs and regulation of left-right asymmetry.                                                                                                                     |
| HMX2    | H6 family homeobox 2                                                   |                                                                                                                                                                                                                                                                                                                                                   |
| HOXA5   | homeobox A5                                                            | This protein regulates gene expression, morphogenesis, and differentiation, and plays a role in tumorigenesis.                                                                                                                                                                                                                                    |
| HOXB3   | homeobox B3                                                            | The encoded protein functions as a sequence-specific transcription factor that is involved in development.                                                                                                                                                                                                                                        |
| HOXB13  | homeobox B13                                                           | This gene has been implicated to play a role in fetal skin development and cutaneous regeneration. Studies have exhibited temporal and spatial colinearity in the main body axis of the embryo, but it was not expressed in the secondary axes, which suggests functions in body patterning along the axis.                                       |
| HOXC4   | homeobox C4                                                            | Homeobox transcription factors play an important role in morphogenesis in all multicellular organisms. This gene, HOXC4, is one of several homeobox HOXC genes located in a cluster on chromosome 12.                                                                                                                                             |
| HOXD3   | homeobox D3                                                            | The protein encoded by this gene may play a role in the regulation of cell adhesion processes.                                                                                                                                                                                                                                                    |
| HTRA2   | HtrA serine peptidase 2                                                | This gene encodes a serine protease. The protein is thought to induce apoptosis by binding the apoptosis inhibitory protein baculoviral IAP repeat-containing 4. Nuclear localization of this protein has also been observed.                                                                                                                     |
| ID4     | inhibitor of DNA binding 4, dominant negative helix-loop-helix protein | Consequently, Id proteins inhibit binding to DNA and transcriptional transactivation by heterodimerization with bHLH proteins.                                                                                                                                                                                                                    |
| IFT57   | intraflagellar transport 57 homolog (Chlamydomonas)                    |                                                                                                                                                                                                                                                                                                                                                   |
| IGF1    | insulin-like growth factor 1 (somatomedin C)                           | The protein encoded by this gene is similar to insulin in function and structure and is a member of a family of proteins involved in mediating growth and development.                                                                                                                                                                            |
| IGF2BP1 | insulin-like growth factor 2 mRNA binding protein 1                    | This protein functions by binding to the mRNAs of certain genes, including insulin-like growth factor 2, beta-actin and beta-transducin repeat-containing protein, and regulating their translation.                                                                                                                                              |
| IHH     | Indian hedgehog homolog (Drosophila)                                   |                                                                                                                                                                                                                                                                                                                                                   |
| IL3     | interleukin 3 (colony-stimulating factor, multiple)                    | This protein is a potent growth promoting cytokine, especially with hematopoietic cell types. It is involved in cell growth, differentiation and apoptosis, and also possesses neurotrophic activity.                                                                                                                                             |
| IL11    | interleukin 11                                                         | This cytokine is shown to stimulate the T-cell-dependent development of immunoglobulin-producing B cells. It is also found to support the proliferation of hematopoietic stem cells and megakaryocyte progenitor cells.                                                                                                                           |



|           |                                                                                              |                                                                                                                                                                                                                                                                                                      |
|-----------|----------------------------------------------------------------------------------------------|------------------------------------------------------------------------------------------------------------------------------------------------------------------------------------------------------------------------------------------------------------------------------------------------------|
| IL17A     | interleukin 17A                                                                              | This protein is a proinflammatory cytokine produced by activated T cells that regulates the activities of NF-kappaB and mitogen-activated protein kinases. It can stimulate the expression of IL6 and cyclooxygenase-2 (PTGS2/COX-2), and enhance the production of nitric oxide (NO).               |
| INHBA     | inhibin, alpha                                                                               | Inhibin has been shown to regulate gonadal stromal cell proliferation negatively and to have tumour-suppressor activity, and it is proposed that inhibin may be both a growth/differentiation factor and a hormone.                                                                                  |
| ITGB1     | integrin, beta 1 (fibronectin receptor, beta polypeptide, antigen CD29 includes MDF2, MSK12) | Integrin family members are membrane receptors involved in cell adhesion and recognition in a variety of processes including embryogenesis, hemostasis, tissue repair, immune response and metastatic diffusion of tumor cells.                                                                      |
| ITGB3     | integrin, beta 3 (platelet glycoprotein IIIa, antigen CD61)                                  | Integrins are known to participate in cell adhesion as well as cell-surface mediated signalling.                                                                                                                                                                                                     |
| KRAS      | v-Ki-ras2 Kirsten rat sarcoma viral oncogene homolog                                         | This gene, a Kirsten ras oncogene, encodes a protein that is a member of the small GTPase superfamily. The transforming protein that results is implicated in various malignancies, including lung adenocarcinoma, mucinous adenoma, ductal carcinoma of the pancreas and colorectal carcinoma.      |
| LAMA5     | laminin, alpha 5                                                                             | The protein encoded by this gene belongs to the alpha subfamily of laminin chains and is a major component of basement membranes.                                                                                                                                                                    |
| LEF1      | lymphoid enhancer-binding factor 1                                                           | LEF1 is a nuclear protein that is expressed in pre-B and T cells. It binds to a functionally important site in the T-cell receptor-alpha (TCRA; MIM 186880) enhancer and confers maximal enhancer activity.                                                                                          |
| LHB       | luteinizing hormone beta polypeptide                                                         | This gene encodes the beta subunit of luteinizing hormone (LH), which is expressed in the pituitary gland and promotes spermatogenesis and ovulation by stimulating the testes and ovaries to synthesize steroids.                                                                                   |
| LHCGR     | luteinizing hormone/choriogonadotropin receptor                                              | This gene encodes the receptor for both luteinizing hormone and choriogonadotropin.                                                                                                                                                                                                                  |
| LHX8      | LIM homeobox 8                                                                               | Members of the LIM homeobox gene family, such as LHX8, encode transcription regulators that share common structural features. Members of the LIM homeobox gene family are required for the patterning or the specification and differentiation of different cell types during embryonic development. |
| LHX9      | LIM homeobox 9                                                                               | This protein is highly similar to a mouse protein that causes gonadal agenesis when inactivated, suggesting a role in gonadal development.                                                                                                                                                           |
| LLGL1     | lethal giant larvae homolog 1 (Drosophila)                                                   | This gene encodes a protein that is similar to a tumor suppressor in Drosophila.                                                                                                                                                                                                                     |
| MAB21L1   | mab-21-like 1 (C. elegans)                                                                   | This protein may be involved in eye and cerebellum development.                                                                                                                                                                                                                                      |
| MAB21L2   | mab-21-like 2 (C. elegans)                                                                   | This gene may be involved in neural development.                                                                                                                                                                                                                                                     |
| MAP2K5    | mitogen-activated protein kinase kinase 5                                                    | The signal cascade mediated by this kinase is involved in growth factor stimulated cell proliferation and muscle cell differentiation.                                                                                                                                                               |
| MAP3K7IP1 | mitogen-activated protein kinase kinase kinase 7 interacting protein 1                       | This protein was identified as a regulator of the MAP kinase kinase kinase MAP3K7/TAK1, which is known to mediate various intracellular signaling pathways, such as those induced by TGF beta, interleukin 1, and WNT-1                                                                              |

|        |                                                                                   |                                                                                                                                                                                                                                                                                                                     |
|--------|-----------------------------------------------------------------------------------|---------------------------------------------------------------------------------------------------------------------------------------------------------------------------------------------------------------------------------------------------------------------------------------------------------------------|
| MAPK8  | mitogen-activated protein kinase 8                                                | This kinase mediates immediate-early gene expression in response to cell stimuli and is related to cytochrome c-mediated cell death pathway. The mouse counterpart plays a key role in T cell proliferation, apoptosis and differentiation.                                                                         |
| MAPT   | microtubule-associated protein tau                                                | MAPT transcripts are differentially expressed in the nervous system, depending on stage of neuronal maturation and neuron type.                                                                                                                                                                                     |
| MESP1  | mesoderm posterior 1 homolog (mouse)                                              |                                                                                                                                                                                                                                                                                                                     |
| MET    | met proto-oncogene (hepatocyte growth factor receptor)                            | The proto-oncogene MET product is the hepatocyte growth factor receptor and encodes tyrosine-kinase activity.                                                                                                                                                                                                       |
| MNX1   | motor neuron and pancreas homeobox 1                                              |                                                                                                                                                                                                                                                                                                                     |
| MSX1   | msh homeobox 1                                                                    | This protein functions as a transcriptional repressor during embryogenesis through interactions with components of the core transcription complex and other homeoproteins. It may also have roles in limb-pattern formation, craniofacial development, particularly odontogenesis, and tumor growth inhibition.     |
| MYCN   | v-myc myelocytomatosis viral related oncogene, neuroblastoma derived (avian)      | This gene is a member of the MYC family and encodes a protein with a basic helix-loop-helix (bHLH) domain. This protein is located in the nucleus and must dimerize with another bHLH protein in order to bind DNA. Amplification of this gene is associated with a variety of tumors, most notably neuroblastomas. |
| MYL7   | myosin, light chain 7, regulatory                                                 |                                                                                                                                                                                                                                                                                                                     |
| MYO5A  | myosin VA (heavy chain 12, myoxin)                                                | Myosin V is a class of actin-based motor proteins involved in cytoplasmic vesicle transport and anchorage, spindle-pole alignment and mRNA translocation. The protein encoded by this gene is abundant in melanocytes and nerve cells.                                                                              |
| MYOCD  | myocardin                                                                         | Myocardin can induce smooth muscle differentiation by its association with serum response factor (SRF; MIM 600589).                                                                                                                                                                                                 |
| NDUFS4 | NADH dehydrogenase (ubiquinone) Fe-S protein 4, 18kDa (NADH-coenzyme Q reductase) | This accessory subunit of the mitochondrial membrane respiratory chain NADH dehydrogenase (Complex I) plays a vital role in cellular ATP production, the primary source of energy for many crucial processes in living cells.                                                                                       |
| NF1    | neurofibromin 1                                                                   | This gene product appears to function as a negative regulator of the ras signal transduction pathway.                                                                                                                                                                                                               |
| NKX2-1 | NK2 homeobox 1                                                                    |                                                                                                                                                                                                                                                                                                                     |
| NNAT   | neuronatin                                                                        | This protein is a proteolipid that may be involved in the regulation of ion channels during brain development. The encoded protein may also play a role in forming and maintaining the structure of the nervous system.                                                                                             |
| NOG    | noggin                                                                            | This protein may have a principal role in creating morphogenic gradients, and in numerous developmental processes, such as neural tube fusion and joint formation.                                                                                                                                                  |
| NR2E1  | nuclear receptor subfamily 2, group E, member 1                                   |                                                                                                                                                                                                                                                                                                                     |
| NR2F2  | nuclear receptor subfamily 2, group F, member 2                                   |                                                                                                                                                                                                                                                                                                                     |

|         |                                                                                                 |                                                                                                                                                                                                                                                                                          |
|---------|-------------------------------------------------------------------------------------------------|------------------------------------------------------------------------------------------------------------------------------------------------------------------------------------------------------------------------------------------------------------------------------------------|
| NRG1    | neuregulin 1                                                                                    | This protein is a signaling protein that mediates cell-cell interactions and plays critical roles in the growth and development of multiple organ systems.                                                                                                                               |
| NRP2    | neuropilin 2                                                                                    | The encoded transmembrane protein binds to SEMA3C protein and SEMA3F protein, and interacts with vascular endothelial growth factor (VEGF). This protein may play a role in cardiovascular development, axon guidance, and tumorigenesis.                                                |
| NTRK3   | neurotrophic tyrosine kinase, receptor, type 3                                                  | This kinase is a membrane-bound receptor that, upon neurotrophin binding, phosphorylates itself and members of the MAPK pathway. Signalling through this kinase leads to cell differentiation and may play a role in the development of proprioceptive neurons that sense body position. |
| ONECUT2 | one cut homeobox 2                                                                              | This protein stimulates expression of target genes, including genes involved in melanocyte and hepatocyte differentiation.                                                                                                                                                               |
| PAX2    | paired box 2                                                                                    | PAX2 is believed to be a target of transcriptional suppression by the tumor suppressor gene WT1. Members of the PAX family play critical roles during fetal development.                                                                                                                 |
| PAX3    | paired box 3                                                                                    |                                                                                                                                                                                                                                                                                          |
| PAX5    | paired box 5                                                                                    | This gene encodes the B-cell lineage specific activator protein that is expressed at early, but not late stages of B-cell differentiation. It may also play a role in neural development and spermatogenesis.                                                                            |
| PAX8    | paired box 8                                                                                    | This nuclear protein is involved in thyroid follicular cell development and expression of thyroid-specific genes.                                                                                                                                                                        |
| PDGFB   | platelet-derived growth factor beta polypeptide (simian sarcoma viral (v-sis) oncogene homolog) | The protein encoded by this gene is a member of the platelet-derived growth factor family. The four members of this family are mitogenic factors for cells of mesenchymal origin and are characterized by a motif of eight cysteines.                                                    |
| PGF     | placental growth factor                                                                         |                                                                                                                                                                                                                                                                                          |
| PKHD1   | polycystic kidney and hepatic disease 1 (autosomal recessive)                                   | The protein encoded by this gene is predicted to have a single transmembrane (TM)-spanning domain and multiple copies of an immunoglobulin-like plexin-transcription-factor domain.                                                                                                      |
| PLCE1   | phospholipase C, epsilon 1                                                                      | The products of the PLCE1 cascade initiate intracellular responses that result in cell growth and differentiation and gene expression.                                                                                                                                                   |
| POU6F1  | POU class 6 homeobox 1                                                                          |                                                                                                                                                                                                                                                                                          |
| PRDX2   | peroxiredoxin 2                                                                                 | This protein may play an antioxidant protective role in cells, and may contribute to the antiviral activity of CD8(+) T-cells. This protein may have a proliferative effect and play a role in cancer development or progression.                                                        |
| PRKACG  | protein kinase, cAMP-dependent, catalytic, gamma                                                | This gene is thought to be a retrotransposon derived from the gene for the alpha form of the PKA catalytic subunit.                                                                                                                                                                      |
| PRKG1   | protein kinase, cGMP-dependent, type I                                                          |                                                                                                                                                                                                                                                                                          |
| PRKRA   | protein kinase, interferon-inducible double stranded RNA dependent activator                    | This protein is a protein kinase activated by double-stranded RNA which mediates the effects of interferon in response to viral infection.                                                                                                                                               |
| PTEN    | phosphatase and tensin homolog                                                                  | This protein preferentially dephosphorylates phosphoinositide substrates. It negatively regulates intracellular levels of phosphatidylinositol-3,4,5-trisphosphate in cells and functions as a tumor suppressor by negatively regulating AKT/PKB signaling pathway.                      |

|        |                                                                               |                                                                                                                                                                                                                                                                                                                                        |
|--------|-------------------------------------------------------------------------------|----------------------------------------------------------------------------------------------------------------------------------------------------------------------------------------------------------------------------------------------------------------------------------------------------------------------------------------|
| PTH LH | parathyroid hormone-like hormone                                              | This hormone regulates endochondral bone development and epithelial-mesenchymal interactions during the formation of the mammary glands and teeth. It is involved in lactation possibly by regulating the mobilization and transfer of calcium to the milk.                                                                            |
| PYGO2  | pygopus homolog 2 (Drosophila)                                                |                                                                                                                                                                                                                                                                                                                                        |
| RBL1   | retinoblastoma-like 1 (p107)                                                  | It is thought that, given the homology to the known tumor suppressor RB1, the protein encoded by this gene may also be a tumor suppressor.                                                                                                                                                                                             |
| RBPJ   | recombination signal binding protein for immunoglobulin kappa J region        |                                                                                                                                                                                                                                                                                                                                        |
| RFX4   | regulatory factor X, 4 (influences HLA class II expression)                   | This protein may be a transcriptional repressor rather than a transcriptional activator.                                                                                                                                                                                                                                               |
| ROBO2  | roundabout, axon guidance receptor, homolog 2 (Drosophila)                    | The encoded protein is a receptor for SLIT2, molecules known to function in axon guidance and cell migration.                                                                                                                                                                                                                          |
| RPS6   | ribosomal protein S6                                                          | This gene encodes a cytoplasmic ribosomal protein that may contribute to the control of cell growth and proliferation through the selective translation of particular classes of mRNA.                                                                                                                                                 |
| RXFP2  | relaxin/insulin-like family peptide receptor 2                                | This is a receptor for glycoprotein hormones such as follicle-stimulating hormone (FSH; see MIM 136530) and thyroid-stimulating hormone (TSH; see MIM 188540).                                                                                                                                                                         |
| SALL1  | sal-like 1 (Drosophila)                                                       | The protein encoded by this gene is a zinc finger transcriptional repressor and may be part of the NuRD histone deacetylase complex (HDAC).                                                                                                                                                                                            |
| SELE   | selectin E                                                                    | The protein encoded by this gene is found in cytokine-stimulated endothelial cells and is thought to be responsible for the accumulation of blood leukocytes at sites of inflammation by mediating the adhesion of cells to the vascular lining. It exhibits st                                                                        |
| SFTPB  | surfactant protein B                                                          | The SFTPB gene encodes the pulmonary-associated surfactant B protein (SPB), an amphipathic surfactant protein essential for lung function and homeostasis after birth.                                                                                                                                                                 |
| SHOX2  | short stature homeobox 2                                                      | SHOX is a pseudoautosomal homeo box gene that is thought to be responsible for idiopathic short stature and implicated to play a role in the short stature phenotype of Turner syndrome patients.                                                                                                                                      |
| SIX2   | SIX homeobox 2                                                                | The encoded protein is a transcription factor which, like other members of this gene family, may be involved in limb or eye development.                                                                                                                                                                                               |
| SLC1A2 | solute carrier family 1 (glial high affinity glutamate transporter), member 2 | The membrane-bound protein is the principal transporter that clears the excitatory neurotransmitter glutamate from the extracellular space at synapses in the central nervous system. Glutamate clearance is necessary for proper synaptic activation and to prevent neuronal damage from excessive activation of glutamate receptors. |
| SMO    | smoothed homolog (Drosophila)                                                 |                                                                                                                                                                                                                                                                                                                                        |
| SNAI2  | snail homolog 2 (Drosophila)                                                  | The encoded protein acts as a transcriptional repressor that binds to E-box motifs. This protein is involved in epithelial-mesenchymal transitions and has antiapoptotic activity.                                                                                                                                                     |
| SOX1   | SRY (sex determining region Y)-box 1                                          | This protein is involved in the regulation of embryonic development and in the determination of the cell fate, and may be essential for lens development.                                                                                                                                                                              |

|        |                                                          |                                                                                                                                                                                                                                                                                                                                    |
|--------|----------------------------------------------------------|------------------------------------------------------------------------------------------------------------------------------------------------------------------------------------------------------------------------------------------------------------------------------------------------------------------------------------|
| SOX2   | SRY (sex determining region Y)-box 2                     | This protein is required for stem-cell maintenance in the central nervous system, and also regulates gene expression in the stomach.                                                                                                                                                                                               |
| SOX15  | SRY (sex determining region Y)-box 15                    | This SOX family transcription factor is involved in the regulation of embryonic development and in the determination of the cell fate. It may act as a transcriptional regulator after forming a protein complex with other proteins.                                                                                              |
| SPTBN1 | spectrin, beta, non-erythrocytic 1                       | Spectrin is an actin crosslinking and molecular scaffold protein that links the plasma membrane to the actin cytoskeleton, and functions in the determination of cell shape, arrangement of transmembrane proteins, and organization of organelles.                                                                                |
| SRI    | sorcin                                                   |                                                                                                                                                                                                                                                                                                                                    |
| STIL   | SCL/TAL1 interrupting locus                              | This gene encodes a cytoplasmic protein implicated in regulation of the mitotic spindle checkpoint, a regulatory pathway that monitors chromosome segregation during cell division to ensure the proper distribution of chromosomes to daughter cells.                                                                             |
| STX2   | syntaxin 2                                               | The product of this gene regulates epithelial-mesenchymal interactions and epithelial cell morphogenesis and activation.                                                                                                                                                                                                           |
| SYCP3  | synaptonemal complex protein 3                           |                                                                                                                                                                                                                                                                                                                                    |
| TAL2   | T-cell acute lymphocytic leukemia 2                      | Translocations between this gene on chromosome 9 and the T-cell receptor beta-chain locus on chromosome 7 have been associated with activation of the T-cell acute lymphocytic leukemia 2 gene and T-cell acute lymphoblastic leukemia.                                                                                            |
| TBX5   | T-box 5                                                  | This protein may play a role in heart development and specification of limb identity.                                                                                                                                                                                                                                              |
| TCF21  | transcription factor 21                                  | The TCF21 product is mesoderm specific, and expressed in embryonic epicardium, mesenchyme-derived tissues of lung, gut, gonad, and both mesenchymal and glomerular epithelial cells in the kidney.                                                                                                                                 |
| TCF7L2 | transcription factor 7-like 2 (T-cell specific, HMG-box) | This protein has been implicated in blood glucose homeostasis. Genetic variants of this gene are associated with increased risk of type 2 diabetes.                                                                                                                                                                                |
| TGFBR3 | transforming growth factor, beta receptor III            | Transforming growth factor (TGF)-beta is a multifunctional cytokine that modulates several tissue development and repair processes, including cell differentiation, cell cycle progression, cellular migration, adhesion, and extracellular matrix production.                                                                     |
| TH     | tyrosine hydroxylase                                     | The protein encoded by this gene is involved in the conversion of tyrosine to dopamine. It is the rate-limiting enzyme in the synthesis of catecholamines, hence plays a key role in the physiology of adrenergic neurons.                                                                                                         |
| THBS2  | thrombospondin 2                                         | This protein mediates cell-to-cell and cell-to-matrix interactions. It has been shown to function as a potent inhibitor of tumor growth and angiogenesis. Studies of the mouse counterpart suggest that this protein may modulate the cell surface properties of mesenchymal cells and be involved in cell adhesion and migration. |
| TINAG  | tubulointerstitial nephritis antigen                     | TINAG is a basement membrane glycoprotein initially identified as a target of antibodies in some forms of immunologically mediated tubulointerstitial nephritis.                                                                                                                                                                   |
| TP63   | tumor protein p63                                        | This protein plays a role in the development and maintenance of stratified epithelial tissues. p63 <sup>-/-</sup> mice have several developmental defects which include the lack of limbs and other tissues, such as teeth and mammary glands, which develop as a result of interactions between mesenchyme and epithelium.        |
| TTN    | titin                                                    | This gene encodes a large abundant protein of striated muscle. Titin also contains binding sites for muscle associated proteins so it serves as an adhesion template for the assembly of contractile machinery in muscle cells. It has also been identified as a structural protein for chromosomes.                               |

|       |                                                      |                                                                                                                                                                                                             |
|-------|------------------------------------------------------|-------------------------------------------------------------------------------------------------------------------------------------------------------------------------------------------------------------|
| UNC5C | unc-5 homolog C (C. elegans)                         | The UNC-5 family of receptors mediate the repellent response to netrin.                                                                                                                                     |
| UPK3A | uroplakin 3A                                         | The asymmetric unit membrane (AUM) forms the apical plaques of urothelium and is believed to strengthen the urothelial apical surface and prevent the cells from rupturing during bladder distention.       |
| WT1   | Wilms tumor 1                                        | This protein has an essential role in the normal development of the urogenital system, and it is mutated in a small subset of patients with Wilm's tumors.                                                  |
| ZFPM2 | zinc finger protein, multitype 2                     | Proteins which modulate the activity of GATA family proteins are important regulators of hematopoiesis and cardiogenesis. This protein can both activate and down-regulate expression of GATA-target genes. |
| ZIC1  | Zic family member 1 (odd-paired homolog, Drosophila) | This gene encodes a transcription factor that can bind and transactivate the apolipoprotein E gene.                                                                                                         |
| ZIC2  | Zic family member 2 (odd-paired homolog, Drosophila) | This protein functions as a transcriptional repressor and may regulate tissue specific expression of dopamine receptor D1.                                                                                  |
| ZIC3  | Zic family member 3 (odd-paired homolog, Drosophila) | This nuclear protein probably functions as a transcription factor in early stages of left-right body axis formation.                                                                                        |

Organ Development,  
Nervous System  
Development and  
Function: Development:  
Development of Dentate  
Gyrus (7.18E-04)

|       |                                            |                                                                                                                                                                                                                                                 |
|-------|--------------------------------------------|-------------------------------------------------------------------------------------------------------------------------------------------------------------------------------------------------------------------------------------------------|
| CNR1  | cannabinoid receptor 1 (brain)             | This gene encodes one of two cannabinoid receptors, which have been found to be involved in the cannabinoid-induced CNS effects (including alterations in mood and cognition) experienced by users of marijuana.                                |
| EMX2  | empty spiracles homeobox 2                 | The homeodomain transcription factor EMX2 is critical for central nervous system and urogenital development.                                                                                                                                    |
| FGF2  | fibroblast growth factor 2 (basic)         | The CUG-initiated isoforms of this gene are localized in the nucleus and are responsible for the intracrine effect, whereas, the AUG-initiated form is mostly cytosolic and is responsible for the paracrine and autocrine effects of this FGF. |
| LEF1  | lymphoid enhancer-binding factor 1         | LEF1 is a nuclear protein that is expressed in pre-B and T cells. It binds to a functionally important site in the T-cell receptor-alpha (TCRA; MIM 186880) enhancer and confers maximal enhancer activity.                                     |
| LMX1A | LIM homeobox transcription factor 1, alpha | LMX1 is a homeodomain protein that stimulates transcription of insulin.                                                                                                                                                                         |

Organ Development:  
Development:  
Development of Ovarian  
Follicle (9.30E-04)

|        |                               |                                                                                                                                                                                                                                                                                                                                                                                                                                          |
|--------|-------------------------------|------------------------------------------------------------------------------------------------------------------------------------------------------------------------------------------------------------------------------------------------------------------------------------------------------------------------------------------------------------------------------------------------------------------------------------------|
| ANGPT1 | angiopoietin 1                | This protein plays a role in mediating reciprocal interactions between the endothelium and surrounding matrix and mesenchyme. It also contributes to blood vessel maturation and stability, and may be involved in early development of the heart.                                                                                                                                                                                       |
| ATM    | ataxia telangiectasia mutated | This protein functions as a regulator of a wide variety of downstream proteins, including tumor suppressor proteins p53 and BRCA1, checkpoint kinase CHK2, checkpoint proteins RAD17 and RAD9, and DNA repair protein NBS1. This protein and the closely related kinase ATR are thought to be master controllers of cell cycle checkpoint signaling pathways that are required for cell response to DNA damage and for genome stability. |

|         |                                                                                           |                                                                                                                                                                                                                                                                                                               |
|---------|-------------------------------------------------------------------------------------------|---------------------------------------------------------------------------------------------------------------------------------------------------------------------------------------------------------------------------------------------------------------------------------------------------------------|
| BCL2    | B-cell CLL/lymphoma 2                                                                     | This gene encodes an integral outer mitochondrial membrane protein that blocks the apoptotic death of some cells such as lymphocytes.                                                                                                                                                                         |
| BMP15   | bone morphogenetic protein 15                                                             | This protein may be involved in oocyte maturation and follicular development as a homodimer or by forming heterodimers with a related protein, Gdf9.                                                                                                                                                          |
| CYP19A1 | cytochrome P450, family 19, subfamily A, polypeptide 1                                    | This protein localizes to the endoplasmic reticulum and catalyzes the last steps of estrogen biosynthesis, three successive hydroxylations of the A ring of androgens.                                                                                                                                        |
| DMC1    | DMC1 dosage suppressor of mck1 homolog, meiosis-specific homologous recombination (yeast) | This protein is essential for meiotic homologous recombination.                                                                                                                                                                                                                                               |
| ESR1    | estrogen receptor 1                                                                       | This gene encodes an estrogen receptor which are essential for sexual development and reproductive function, but also play a role in other tissues such as bone.                                                                                                                                              |
| FGF7    | fibroblast growth factor 7 (keratinocyte growth factor)                                   | This protein is an epithelial cell-specific growth factor, whose mitogenic activity is exhibited in keratinocytes but not in fibroblasts and endothelial cells. It may also be implicated roles in morphogenesis of epithelium, reepithelialization of wounds, hair development and early lung organogenesis. |
| GDF9    | growth differentiation factor 9                                                           | Growth differentiation factor-9 (GDF9) is expressed in oocytes and is thought to be required for ovarian folliculogenesis.                                                                                                                                                                                    |
| IGF1    | insulin-like growth factor 1 (somatomedin C)                                              | The protein encoded by this gene is similar to insulin in function and structure and is a member of a family of proteins involved in mediating growth and development.                                                                                                                                        |
| INHBA   | inhibin, alpha                                                                            | Inhibin has been shown to regulate gonadal stromal cell proliferation negatively and to have tumour-suppressor activity, and it is proposed that inhibin may be both a growth/differentiation factor and a hormone.                                                                                           |
| KIT     | v-kit Hardy-Zuckerman 4 feline sarcoma viral oncogene homolog                             | This gene encodes the human homolog of the proto-oncogene c-kit. This protein is a type 3 transmembrane receptor for MGF (mast cell growth factor, also known as stem cell factor).                                                                                                                           |
| LEPR    | leptin receptor                                                                           | Leptin (LEP; MIM 164160), an adipocyte-specific hormone that regulates adipose-tissue mass through hypothalamic effects on satiety and energy expenditure, acts through the leptin receptor (LEPR).                                                                                                           |
| LHB     | luteinizing hormone beta polypeptide                                                      | This gene encodes the beta subunit of luteinizing hormone (LH), which is expressed in the pituitary gland and promotes spermatogenesis and ovulation by stimulating the testes and ovaries to synthesize steroids.                                                                                            |
| LHCGR   | luteinizing hormone/choriogonadotropin receptor                                           | This gene encodes the receptor for both luteinizing hormone and choriogonadotropin.                                                                                                                                                                                                                           |
| SPO11   | SPO11 meiotic protein covalently bound to DSB homolog (S. cerevisiae)                     | The protein encoded by this gene is similar in sequence and conserved features to the yeast meiotic recombination protein.                                                                                                                                                                                    |
| TAF4B   | TAF4b RNA polymerase II, TATA box binding protein (TBP)-associated factor, 105kDa         | TATA-binding protein associated factors are involved in the initiation of gene transcription by RNA polymerase II (see MIM 180660).                                                                                                                                                                           |

|                                                                  |         |                                                           |                                                                                                                                                                                                                                                                                                                                                                                                                                          |
|------------------------------------------------------------------|---------|-----------------------------------------------------------|------------------------------------------------------------------------------------------------------------------------------------------------------------------------------------------------------------------------------------------------------------------------------------------------------------------------------------------------------------------------------------------------------------------------------------------|
|                                                                  | TF      | transferrin                                               | The function of this encoded protein is to transport iron from the intestine, reticuloendothelial system, and liver parenchymal cells to all proliferating cells in the body. It may also be involved in the removal of certain organic matter/allergens from serum.                                                                                                                                                                     |
|                                                                  | VGF     | VGF nerve growth factor inducible                         | This gene is specifically expressed in a subpopulation of neuroendocrine cells, and is upregulated by nerve growth factor.                                                                                                                                                                                                                                                                                                               |
| Organ Development:<br>Organogenesis:<br>Organogenesis (7.46E-06) | ABI2    | abl interactor 2                                          |                                                                                                                                                                                                                                                                                                                                                                                                                                          |
|                                                                  | ACADM   | acyl-Coenzyme A dehydrogenase, C-4 to C-12 straight chain | The homotetramer enzyme catalyzes the initial step of the mitochondrial fatty acid beta-oxidation pathway.                                                                                                                                                                                                                                                                                                                               |
|                                                                  | ADRA1A  | adrenergic, alpha-1A-, receptor                           | This gene activates mitogenic responses and regulates growth and proliferation of many cells.                                                                                                                                                                                                                                                                                                                                            |
|                                                                  | ALDH1A3 | aldehyde dehydrogenase 1 family, member A3                | Aldehyde dehydrogenase isozymes are thought to play a major role in the detoxification of aldehydes generated by alcohol metabolism and lipid peroxidation.                                                                                                                                                                                                                                                                              |
|                                                                  | ANKRD7  | ankyrin repeat domain 7                                   |                                                                                                                                                                                                                                                                                                                                                                                                                                          |
|                                                                  | AR      | androgen receptor                                         | This protein functions as a steroid-hormone activated transcription factor.                                                                                                                                                                                                                                                                                                                                                              |
|                                                                  | ASCL1   | achaete-scute complex homolog 1 (Drosophila)              | The protein activates transcription by binding to the E box. This protein plays a role in the neuronal commitment and differentiation and in the generation of olfactory and autonomic neurons.                                                                                                                                                                                                                                          |
|                                                                  | ATM     | ataxia telangiectasia mutated                             | This protein functions as a regulator of a wide variety of downstream proteins, including tumor suppressor proteins p53 and BRCA1, checkpoint kinase CHK2, checkpoint proteins RAD17 and RAD9, and DNA repair protein NBS1. This protein and the closely related kinase ATR are thought to be master controllers of cell cycle checkpoint signaling pathways that are required for cell response to DNA damage and for genome stability. |
|                                                                  | BCL2    | B-cell CLL/lymphoma 2                                     | This gene encodes an integral outer mitochondrial membrane protein that blocks the apoptotic death of some cells such as lymphocytes.                                                                                                                                                                                                                                                                                                    |
|                                                                  | BMP5    | bone morphogenetic protein 5                              | This protein may act as signaling molecule within the trabecular meshwork and optic nerve head, and may play a potential role in glaucoma pathogenesis. This gene is differentially regulated during the formation of various tumors.                                                                                                                                                                                                    |
|                                                                  | BMP7    | bone morphogenetic protein 7                              | Based on its expression early in embryogenesis, the BMP encoded by this gene has a proposed role in early development and possible bone inductive activity.                                                                                                                                                                                                                                                                              |
|                                                                  | BMP15   | bone morphogenetic protein 15                             | This protein may be involved in oocyte maturation and follicular development as a homodimer or by forming heterodimers with a related protein, Gdf9.                                                                                                                                                                                                                                                                                     |
|                                                                  | BMPR1B  | bone morphogenetic protein receptor, type IB              | The ligands of this receptor are BMPs, which are members of the TGF-beta superfamily. BMPs are involved in endochondral bone formation and embryogenesis.                                                                                                                                                                                                                                                                                |
|                                                                  | CALCRL  | calcitonin receptor-like                                  |                                                                                                                                                                                                                                                                                                                                                                                                                                          |
|                                                                  | CHD7    | chromodomain helicase DNA binding protein 7               | This gene encodes a protein that contains several helicase family domains.                                                                                                                                                                                                                                                                                                                                                               |
|                                                                  | COL11A1 | collagen, type XI, alpha 1                                | This gene encodes one of the two alpha chains of type XI collagen, a minor fibrillar collagen. Type XI collagen is a heterotrimer but the third alpha chain is a post-translationally modified alpha 1 type II chain.                                                                                                                                                                                                                    |



|         |                                                        |                                                                                                                                                                                                                                                                                                                                                                                                                         |
|---------|--------------------------------------------------------|-------------------------------------------------------------------------------------------------------------------------------------------------------------------------------------------------------------------------------------------------------------------------------------------------------------------------------------------------------------------------------------------------------------------------|
| COL3A1  | collagen, type III, alpha 1                            | This gene encodes the pro-alpha1 chains of type III collagen, a fibrillar collagen that is found in extensible connective tissues such as skin, lung, uterus, intestine and the vascular system.                                                                                                                                                                                                                        |
| COL5A1  | collagen, type V, alpha 1                              | Type V collagen appears to regulate the assembly of heterotypic fibers composed of both type I and type V collagen.                                                                                                                                                                                                                                                                                                     |
| COL5A3  | collagen, type V, alpha 3                              | Type V collagen is found in tissues containing type I collagen and appears to regulate the assembly of heterotypic fibers composed of both type I and type V collagen.                                                                                                                                                                                                                                                  |
| COL9A1  | collagen, type IX, alpha 1                             | This gene encodes one of the three alpha chains of type IX collagen, which is a minor (5-20%) collagen component of hyaline cartilage. Type IX collagen is usually found in tissues containing type II collagen, a fibrillar collagen.                                                                                                                                                                                  |
| CRH     | corticotropin releasing hormone                        | CRH is secreted by the paraventricular nucleus (PVN) of the hypothalamus in response to stress. In the placenta CRH is a marker that determines the length of gestation and the timing of parturition and delivery. CRH may also act as a trigger for parturition.                                                                                                                                                      |
| CRYGB   | crystallin, gamma B                                    | Whether due to aging or mutations in specific genes, gamma-crystallins have been involved in cataract formation.                                                                                                                                                                                                                                                                                                        |
| CXCL13  | chemokine (C-X-C motif) ligand 13                      | B lymphocyte chemoattractant is a CXC chemokine strongly expressed in the follicles of the spleen, lymph nodes, and Peyer's patches. It promotes the migration of B lymphocytes (compared to T cells and macrophages), apparently by stimulating calcium influx into, and chemotaxis of, cells expressing Burkitt's lymphoma receptor 1 (BLR-1). It may therefore function in the homing of B lymphocytes to follicles. |
| CYP19A1 | cytochrome P450, family 19, subfamily A, polypeptide 1 | This protein localizes to the endoplasmic reticulum and catalyzes the last steps of estrogen biosynthesis, three successive hydroxylations of the A ring of androgens.                                                                                                                                                                                                                                                  |
| DCN     | decorin                                                | This protein is a component of connective tissue, plays a role in matrix assembly and is capable of suppressing the growth of various tumor cell lines.                                                                                                                                                                                                                                                                 |
| DLC1    | deleted in liver cancer 1                              | It is suggested that this gene is a candidate tumor suppressor gene for human liver cancer, as well as for prostate, lung, colorectal, and breast cancers.                                                                                                                                                                                                                                                              |
| DLX1    | distal-less homeobox 1                                 | This protein may function as a transcriptional regulator of signals from multiple TGF- $\beta$ superfamily members. It may play a role in the control of craniofacial patterning and the differentiation and survival of inhibitory neurons in the forebrain.                                                                                                                                                           |
| DMP1    | dentin matrix acidic phosphoprotein 1                  | This protein, which is critical for proper mineralization of bone and dentin, is present in diverse cells of bone and tooth tissues.                                                                                                                                                                                                                                                                                    |
| DMRT2   | doublesex and mab-3 related transcription factor 2     |                                                                                                                                                                                                                                                                                                                                                                                                                         |
| ECE2    | endothelin converting enzyme 2                         | Endothelin-converting enzymes, such as ECE2 (EC 3.4.24.71), are type II metalloproteases that generate functionally pleiotropic members of the endothelin vasoactive peptide family.                                                                                                                                                                                                                                    |
| EDA     | ectodysplasin A                                        | The encoded protein, which belongs to the tumor necrosis factor family, acts as a homotrimer and may be involved in cell-cell signaling during the development of ectodermal organs.                                                                                                                                                                                                                                    |
| EDNRA   | endothelin receptor type A                             |                                                                                                                                                                                                                                                                                                                                                                                                                         |
| EPOR    | erythropoietin receptor                                | This erythropoietin receptor activates Jak2 tyrosine kinase which activates different intracellular pathways including: Ras/MAP kinase, phosphatidylinositol 3-kinase and STAT transcription factors. The stimulated erythropoietin receptor appears to have a role in erythroid cell survival.                                                                                                                         |

|       |                                                                  |                                                                                                                                                                                                                                                                                                                                        |
|-------|------------------------------------------------------------------|----------------------------------------------------------------------------------------------------------------------------------------------------------------------------------------------------------------------------------------------------------------------------------------------------------------------------------------|
| ERBB4 | v-erb-a erythroblastic leukemia viral oncogene homolog 4 (avian) | This gene encodes a protein which binds to and is activated by neuregulins and other factors and induces a variety of cellular responses including mitogenesis and differentiation.                                                                                                                                                    |
| ESR1  | estrogen receptor 1                                              | This gene encodes an estrogen receptor which are essential for sexual development and reproductive function, but also play a role in other tissues such as bone.                                                                                                                                                                       |
| EYA1  | eyes absent homolog 1 (Drosophila)                               | The encoded protein may play a role in the developing kidney, branchial arches, eye, and ear.                                                                                                                                                                                                                                          |
| FABP1 | fatty acid binding protein 1, liver                              | FABP1 is the fatty acid binding protein found in liver. It also binds bile acids.                                                                                                                                                                                                                                                      |
| FANCA | Fanconi anemia, complementation group A                          | Fanconi anemia complementation group members are related by assembly into a common nuclear protein complex.                                                                                                                                                                                                                            |
| FBN1  | fibrillin 1                                                      | This protein is a structural component of 10-12 nm calcium-binding microfibrils, which provide force bearing structural support in elastic and nonelastic connective tissue throughout the body.                                                                                                                                       |
| FGF1  | fibroblast growth factor 1 (acidic)                              | This protein functions as a modifier of endothelial cell migration and proliferation, as well as an angiogenic factor. It acts as a mitogen for a variety of mesoderm- and neuroectoderm-derived cells in vitro, thus is thought to be involved in organogenesis.                                                                      |
| FGF2  | fibroblast growth factor 2 (basic)                               | The CUG-initiated isoforms of this gene are localized in the nucleus and are responsible for the intracrine effect, whereas, the AUG-initiated form is mostly cytosolic and is responsible for the paracrine and autocrine effects of this FGF.                                                                                        |
| FGF4  | fibroblast growth factor 4                                       | This gene was identified by its oncogenic transforming activity. Studies on the mouse homolog suggested a function in bone morphogenesis and limb development through the sonic hedgehog (SHH) signaling pathway.                                                                                                                      |
| FGF10 | fibroblast growth factor 10                                      | This protein exhibits mitogenic activity for keratinizing epidermal cells, but essentially no activity for fibroblasts. It may be required for embryonic epidermal morphogenesis including brain development, lung morphogenesis, and initiation of limb bud formation. It is also implicated to be a primary factor in wound healing. |
| FGFR2 | fibroblast growth factor receptor 2                              | The extracellular portion of this protein interacts with fibroblast growth factors, setting in motion a cascade of downstream signals, ultimately influencing mitogenesis and differentiation.                                                                                                                                         |
| FLI1  | Friend leukemia virus integration 1                              |                                                                                                                                                                                                                                                                                                                                        |
| FN1   | fibronectin 1                                                    | Fibronectin is involved in cell adhesion and migration processes including embryogenesis, wound healing, blood coagulation, host defense, and metastasis.                                                                                                                                                                              |
| GAMT  | guanidinoacetate N-methyltransferase                             | The protein encoded by this gene is a methyltransferase that converts guanidoacetate to creatine.                                                                                                                                                                                                                                      |
| GATA4 | GATA binding protein 4                                           | This protein is thought to regulate genes involved in embryogenesis and in myocardial differentiation and function.                                                                                                                                                                                                                    |
| GDF9  | growth differentiation factor 9                                  | Growth differentiation factor-9 (GDF9) is expressed in oocytes and is thought to be required for ovarian folliculogenesis.                                                                                                                                                                                                             |
| GDNF  | glial cell derived neurotrophic factor                           | The recombinant form of this protein was shown to promote the survival and differentiation of dopaminergic neurons in culture, and was able to prevent apoptosis of motor neurons induced by axotomy.                                                                                                                                  |

|        |                                                     |                                                                                                                                                                                                                                                                             |
|--------|-----------------------------------------------------|-----------------------------------------------------------------------------------------------------------------------------------------------------------------------------------------------------------------------------------------------------------------------------|
| GJC1   | gap junction protein, gamma 1, 45kDa                | The encoded protein is a component of gap junctions, which are composed of arrays of intercellular channels that provide a route for the diffusion of low molecular weight materials from cell to cell.                                                                     |
| GLI3   | GLI family zinc finger 3                            | The protein encoded by this gene localizes in the cytoplasm, activates patched Drosophila homolog (PTCH) gene expression and plays a role during embryogenesis.                                                                                                             |
| HAS2   | hyaluronan synthase 2                               | The functions of this protein include space filling, lubrication of joints, and provision of a matrix through which cells can migrate. It is actively produced during wound healing and tissue repair to provide a framework for ingrowth of blood vessels and fibroblasts. |
| HDAC9  | histone deacetylase 9                               | Histone acetylation/deacetylation alters chromosome structure and affects transcription factor access to DNA. The protein encoded by this gene has sequence homology to members of the histone deacetylase family. This encoded protein may play a role in hematopoiesis.   |
| HES1   | hairy and enhancer of split 1, (Drosophila)         | It is a transcriptional repressor of genes that require a bHLH protein for their transcription. The protein has a particular type of basic domain that contains a helix interrupting protein that binds to the N-box rather than the canonical E-box.                       |
| HEY1   | hairy/enhancer-of-split related with YRPW motif 1   | This gene encodes a transcriptional repressor. Two similar and redundant genes in mouse are required for embryonic cardiovascular development, and are also implicated in neurogenesis and somitogenesis.                                                                   |
| HHIP   | hedgehog interacting protein                        | This protein similar to the mouse hedgehog-interacting protein, which is involved in many fundamental processes in embryonic development, including anteroposterior patterns of limbs and regulation of left-right asymmetry.                                               |
| HOXA5  | homeobox A5                                         | This protein regulates gene expression, morphogenesis, and differentiation, and plays a role in tumorigenesis.                                                                                                                                                              |
| HOXB3  | homeobox B3                                         | The encoded protein functions as a sequence-specific transcription factor that is involved in development.                                                                                                                                                                  |
| HOXB9  | homeobox                                            | This nuclear protein functions as a sequence-specific transcription factor that is involved in cell proliferation and differentiation.                                                                                                                                      |
| HOXD3  | homeobox D3                                         | The protein encoded by this gene may play a role in the regulation of cell adhesion processes.                                                                                                                                                                              |
| HOXD9  | homeobox D9                                         | This gene belongs to the homeobox family of genes. The homeobox genes encode a highly conserved family of transcription factors that play an important role in morphogenesis in all multicellular organisms. The exact role of this gene has not been determined.           |
| IFT57  | intraflagellar transport 57 homolog (Chlamydomonas) |                                                                                                                                                                                                                                                                             |
| IGF1   | insulin-like growth factor 1 (somatomedin C)        | The protein encoded by this gene is similar to insulin in function and structure and is a member of a family of proteins involved in mediating growth and development.                                                                                                      |
| IGFBP5 | insulin-like growth factor binding protein 5        |                                                                                                                                                                                                                                                                             |
| IHH    | Indian hedgehog homolog (Drosophila)                |                                                                                                                                                                                                                                                                             |
| INHA   | inhibin, alpha                                      | Inhibin has been shown to regulate gonadal stromal cell proliferation negatively and to have tumour-suppressor activity, and it is proposed that inhibin may be both a growth/differentiation factor and a hormone.                                                         |

|           |                                                                                              |                                                                                                                                                                                                                                                                                                                 |
|-----------|----------------------------------------------------------------------------------------------|-----------------------------------------------------------------------------------------------------------------------------------------------------------------------------------------------------------------------------------------------------------------------------------------------------------------|
| ITGB1     | integrin, beta 1 (fibronectin receptor, beta polypeptide, antigen CD29 includes MDF2, MSK12) | Integrin family members are membrane receptors involved in cell adhesion and recognition in a variety of processes including embryogenesis, hemostasis, tissue repair, immune response and metastatic diffusion of tumor cells.                                                                                 |
| JAG2      | jagged 2                                                                                     | Members of the Notch gene family encode transmembrane receptors that are critical for various cell fate decisions. The protein encoded by this gene is one of several ligands that activate Notch and related receptors.                                                                                        |
| LAMA5     | laminin, alpha 5                                                                             | The protein encoded by this gene belongs to the alpha subfamily of laminin chains and is a major component of basement membranes.                                                                                                                                                                               |
| LEF1      | lymphoid enhancer-binding factor 1                                                           | LEF1 is a nuclear protein that is expressed in pre-B and T cells. It binds to a functionally important site in the T-cell receptor-alpha (TCRA; MIM 186880) enhancer and confers maximal enhancer activity.                                                                                                     |
| LHB       | luteinizing hormone beta polypeptide                                                         | This gene encodes the beta subunit of luteinizing hormone (LH), which is expressed in the pituitary gland and promotes spermatogenesis and ovulation by stimulating the testes and ovaries to synthesize steroids.                                                                                              |
| LHCGR     | luteinizing hormone/choriogonadotropin receptor                                              | This gene encodes the receptor for both luteinizing hormone and choriogonadotropin.                                                                                                                                                                                                                             |
| LHX8      | LIM homeobox 8                                                                               | Members of the LIM homeobox gene family, such as LHX8, encode transcription regulators that share common structural features. Members of the LIM homeobox gene family are required for the patterning or the specification and differentiation of different cell types during embryonic development.            |
| LHX9      | LIM homeobox 9                                                                               | This protein is highly similar to a mouse protein that causes gonadal agenesis when inactivated, suggesting a role in gonadal development.                                                                                                                                                                      |
| MAB21L1   | mab-21-like 1 (C. elegans)                                                                   | This protein may be involved in eye and cerebellum development.                                                                                                                                                                                                                                                 |
| MAB21L2   | mab-21-like 2 (C. elegans)                                                                   | This gene may be involved in neural development.                                                                                                                                                                                                                                                                |
| MAP2K5    | mitogen-activated protein kinase kinase 5                                                    | The signal cascade mediated by this kinase is involved in growth factor stimulated cell proliferation and muscle cell differentiation.                                                                                                                                                                          |
| MAP3K7IP1 | mitogen-activated protein kinase kinase kinase 7 interacting protein 1                       | This protein was identified as a regulator of the MAP kinase kinase kinase MAP3K7/TAK1, which is known to mediate various intracellular signaling pathways, such as those induced by TGF beta, interleukin 1, and WNT-1                                                                                         |
| MESP1     | mesoderm posterior 1 homolog (mouse)                                                         |                                                                                                                                                                                                                                                                                                                 |
| MSX1      | msh homeobox 1                                                                               | This protein functions as a transcriptional repressor during embryogenesis through interactions with components of the core transcription complex and other homeoproteins. It may also have roles in limb-pattern formation, craniofacial development, particularly odontogenesis, and tumor growth inhibition. |
| MYL7      | myosin, light chain 7, regulatory                                                            |                                                                                                                                                                                                                                                                                                                 |
| MYO5A     | myosin VA (heavy chain 12, myoxin)                                                           | Myosin V is a class of actin-based motor proteins involved in cytoplasmic vesicle transport and anchorage, spindle-pole alignment and mRNA translocation. The protein encoded by this gene is abundant in melanocytes and nerve cells.                                                                          |
| MYOCD     | myocardin                                                                                    | Myocardin can induce smooth muscle differentiation by its association with serum response factor (SRF; MIM 600589).                                                                                                                                                                                             |
| NF1       | neurofibromin 1                                                                              | This gene product appears to function as a negative regulator of the ras signal transduction pathway.                                                                                                                                                                                                           |

|         |                                                                                                 |                                                                                                                                                                                                                                                                                          |
|---------|-------------------------------------------------------------------------------------------------|------------------------------------------------------------------------------------------------------------------------------------------------------------------------------------------------------------------------------------------------------------------------------------------|
| NKX2-1  | NK2 homeobox 1                                                                                  |                                                                                                                                                                                                                                                                                          |
| NR2E1   | nuclear receptor subfamily 2, group E, member 1                                                 |                                                                                                                                                                                                                                                                                          |
| NR2F2   | nuclear receptor subfamily 2, group F, member 2                                                 |                                                                                                                                                                                                                                                                                          |
| NRG1    | neuregulin 1                                                                                    | This protein is a signaling protein that mediates cell-cell interactions and plays critical roles in the growth and development of multiple organ systems.                                                                                                                               |
| NRP2    | neuropilin 2                                                                                    | The encoded transmembrane protein binds to SEMA3C protein and SEMA3F protein, and interacts with vascular endothelial growth factor (VEGF). This protein may play a role in cardiovascular development, axon guidance, and tumorigenesis.                                                |
| NTRK3   | neurotrophic tyrosine kinase, receptor, type 3                                                  | This kinase is a membrane-bound receptor that, upon neurotrophin binding, phosphorylates itself and members of the MAPK pathway. Signalling through this kinase leads to cell differentiation and may play a role in the development of proprioceptive neurons that sense body position. |
| ONECUT2 | one cut homeobox 2                                                                              | This protein stimulates expression of target genes, including genes involved in melanocyte and hepatocyte differentiation.                                                                                                                                                               |
| PAX2    | paired box 2                                                                                    | PAX2 is believed to be a target of transcriptional suppression by the tumor suppressor gene WT1.                                                                                                                                                                                         |
| PAX3    | paired box 3                                                                                    | Members of the PAX family play critical roles during fetal development.                                                                                                                                                                                                                  |
| PAX5    | paired box 5                                                                                    | This gene encodes the B-cell lineage specific activator protein that is expressed at early, but not late stages of B-cell differentiation. It may also play a role in neural development and spermatogenesis.                                                                            |
| PAX8    | paired box 8                                                                                    | This nuclear protein is involved in thyroid follicular cell development and expression of thyroid-specific genes.                                                                                                                                                                        |
| PDGFB   | platelet-derived growth factor beta polypeptide (simian sarcoma viral (v-sis) oncogene homolog) | The protein encoded by this gene is a member of the platelet-derived growth factor family. The four members of this family are mitogenic factors for cells of mesenchymal origin and are characterized by a motif of eight cysteines.                                                    |
| PGF     | placental growth factor                                                                         |                                                                                                                                                                                                                                                                                          |
| PGR     | progesterone receptor                                                                           | The encoded protein mediates the physiological effects of progesterone, which plays a central role in reproductive events associated with the establishment and maintenance of pregnancy.                                                                                                |
| PHLDA2  | pleckstrin homology-like domain, family A, member 2                                             | The mouse version of this gene has been shown to regulate placental growth.                                                                                                                                                                                                              |
| PLCE1   | phospholipase C, epsilon 1                                                                      | The products of the PLCE1 cascade initiate intracellular responses that result in cell growth and differentiation and gene expression.                                                                                                                                                   |
| POU6F1  | POU class 6 homeobox 1                                                                          |                                                                                                                                                                                                                                                                                          |
| PRKACG  | protein kinase, cAMP-dependent, catalytic, gamma                                                | This gene is thought to be a retrotransposon derived from the gene for the alpha form of the PKA catalytic subunit.                                                                                                                                                                      |
| PRKAR2B | protein kinase, cAMP-dependent, regulatory, type II, beta                                       | Knockout studies in mice suggest that this subunit may play an important role in regulating energy balance and adiposity.                                                                                                                                                                |
| PRLR    | prolactin receptor                                                                              |                                                                                                                                                                                                                                                                                          |
| PROX1   | prospero homeobox 1                                                                             |                                                                                                                                                                                                                                                                                          |

|         |                                                                        |                                                                                                                                                                                                                                                                     |
|---------|------------------------------------------------------------------------|---------------------------------------------------------------------------------------------------------------------------------------------------------------------------------------------------------------------------------------------------------------------|
| PTCH1   | patched homolog 1 (Drosophila)                                         | The encoded protein is the receptor for sonic hedgehog, a secreted molecule implicated in the formation of embryonic structures and in tumorigenesis, as well as the desert hedgehog and indian hedgehog proteins. This gene functions as a tumor suppressor.       |
| PTEN    | phosphatase and tensin homolog                                         | This protein preferentially dephosphorylates phosphoinositide substrates. It negatively regulates intracellular levels of phosphatidylinositol-3,4,5-trisphosphate in cells and functions as a tumor suppressor by negatively regulating AKT/PKB signaling pathway. |
| PTH1H   | parathyroid hormone-like hormone                                       | This hormone regulates endochondral bone development and epithelial-mesenchymal interactions during the formation of the mammary glands and teeth. It is involved in lactation possibly by regulating the mobilization and transfer of calcium to the milk.         |
| RBPJ    | recombination signal binding protein for immunoglobulin kappa J region |                                                                                                                                                                                                                                                                     |
| RUNX2   | runt-related transcription factor 2                                    | This protein is essential for osteoblastic differentiation and skeletal morphogenesis and acts as a scaffold for nucleic acids and regulatory factors involved in skeletal gene expression.                                                                         |
| RXFP1   | relaxin/insulin-like family peptide receptor 1                         |                                                                                                                                                                                                                                                                     |
| RXFP2   | relaxin/insulin-like family peptide receptor 2                         | This is a receptor for glycoprotein hormones such as follicle-stimulating hormone (FSH; see MIM 136530) and thyroid-stimulating hormone (TSH; see MIM 188540).                                                                                                      |
| SFTPB   | surfactant protein B                                                   | The SFTPB gene encodes the pulmonary-associated surfactant B protein (SPB), an amphipathic surfactant protein essential for lung function and homeostasis after birth.                                                                                              |
| SHOX2   | short stature homeobox 2                                               | SHOX is a pseudoautosomal homeo box gene that is thought to be responsible for idiopathic short stature and implicated to play a role in the short stature phenotype of Turner syndrome patients.                                                                   |
| SMO     | smoothened homolog (Drosophila)                                        |                                                                                                                                                                                                                                                                     |
| SNAI2   | snail homolog 2 (Drosophila)                                           | The encoded protein acts as a transcriptional repressor that binds to E-box motifs. This protein is involved in epithelial-mesenchymal transitions and has antiapoptotic activity.                                                                                  |
| SOSTDC1 | sclerostin domain containing 1                                         | This protein functions as a bone morphogenetic protein (BMP) antagonist, prohibiting them from binding their receptors, so regulating BMP signaling during cellular proliferation, differentiation, and programmed cell death.                                      |
| SOX15   | SRY (sex determining region Y)-box 15                                  | This SOX family transcription factor is involved in the regulation of embryonic development and in the determination of the cell fate. It may act as a transcriptional regulator after forming a protein complex with other proteins.                               |
| SPTBN1  | spectrin, beta, non-erythrocytic 1                                     | Spectrin is an actin crosslinking and molecular scaffold protein that links the plasma membrane to the actin cytoskeleton, and functions in the determination of cell shape, arrangement of transmembrane proteins, and organization of organelles.                 |
| SRI     | sorcin                                                                 |                                                                                                                                                                                                                                                                     |
| STIL    | SCL/TAL1 interrupting locus                                            | This gene encodes a cytoplasmic protein implicated in regulation of the mitotic spindle checkpoint, a regulatory pathway that monitors chromosome segregation during cell division to ensure the proper distribution of chromosomes to daughter cells.              |
| STX2    | syntaxin 2                                                             | The product of this gene regulates epithelial-mesenchymal interactions and epithelial cell morphogenesis and activation.                                                                                                                                            |

|          |                                                                                                    |                                                                                                                                                                                                                                                                                                                             |
|----------|----------------------------------------------------------------------------------------------------|-----------------------------------------------------------------------------------------------------------------------------------------------------------------------------------------------------------------------------------------------------------------------------------------------------------------------------|
| SYCP2    | synaptonemal complex protein 2                                                                     | The protein encoded by this gene is a major component of the synaptonemal complex and may bind DNA at scaffold attachment regions.                                                                                                                                                                                          |
| SYCP3    | synaptonemal complex protein 3                                                                     |                                                                                                                                                                                                                                                                                                                             |
| TAF4B    | TAF4b RNA polymerase II, TATA box binding protein (TBP)-associated factor, 105kDa                  | TATA-binding protein associated factors are involved in the initiation of gene transcription by RNA polymerase II (see MIM 180660).                                                                                                                                                                                         |
| TBX5     | T-box 5                                                                                            | This protein may play a role in heart development and specification of limb identity.                                                                                                                                                                                                                                       |
| TCF21    | transcription factor 21                                                                            | The TCF21 product is mesoderm specific, and expressed in embryonic epicardium, mesenchyme-derived tissues of lung, gut, gonad, and both mesenchymal and glomerular epithelial cells in the kidney.                                                                                                                          |
| TH       | tyrosine hydroxylase                                                                               | The protein encoded by this gene is involved in the conversion of tyrosine to dopamine. It is the rate-limiting enzyme in the synthesis of catecholamines, hence plays a key role in the physiology of adrenergic neurons.                                                                                                  |
| THRB     | thyroid hormone receptor, beta (erythroblastic leukemia viral (v-erb-a) oncogene homolog 2, avian) | The protein encoded by this gene is a nuclear hormone receptor for triiodothyronine. It is one of the several receptors for thyroid hormone, and has been shown to mediate the biological activities of thyroid hormone.                                                                                                    |
| TMEM176B | transmembrane protein 176B                                                                         |                                                                                                                                                                                                                                                                                                                             |
| TP63     | tumor protein p63                                                                                  | This protein plays a role in the development and maintenance of stratified epithelial tissues. p63 <sup>-/-</sup> mice have several developmental defects which include the lack of limbs and other tissues, such as teeth and mammary glands, which develop as a result of interactions between mesenchyme and epithelium. |
| TTN      | titin                                                                                              | This gene encodes a large abundant protein of striated muscle. Titin also contains binding sites for muscle associated proteins so it serves as an adhesion template for the assembly of contractile machinery in muscle cells. It has also been identified as a structural protein for chromosomes.                        |
| VSX1     | visual system homeobox 1                                                                           | The encoded protein may regulate expression of the cone opsin genes early in development.                                                                                                                                                                                                                                   |
| WNT6     | wingless-type MMTV integration site family, member 6                                               | The WNT proteins have been implicated in oncogenesis and in several developmental processes, including regulation of cell fate and patterning during embryogenesis.                                                                                                                                                         |
| WNT11    | wingless-type MMTV integration site family, member 11                                              | This gene may play roles in the development of skeleton, kidney and lung, and is a plausible candidate gene for High Bone Mass Syndrome.                                                                                                                                                                                    |
| WT1      | Wilms tumor 1                                                                                      | This protein has an essential role in the normal development of the urogenital system, and it is mutated in a small subset of patients with Wilm's tumors.                                                                                                                                                                  |
| ZFPM2    | zinc finger protein, multitype 2                                                                   | Proteins which modulate the activity of GATA family proteins are important regulators of hematopoiesis and cardiogenesis. This protein can both activate and down-regulate expression of GATA-target genes.                                                                                                                 |
| ZIC3     | Zic family member 3 (odd-paired homolog, Drosophila)                                               | This nuclear protein probably functions as a transcription factor in early stages of left-right body axis formation.                                                                                                                                                                                                        |

---

Organ Development:  
Folliculogenesis:  
Folliculogenesis of  
Ovarian Follicle (2.16E-03)

|       |                                                                                           |                                                                                                                                                                                                                                                                                                                                                                                                                                          |
|-------|-------------------------------------------------------------------------------------------|------------------------------------------------------------------------------------------------------------------------------------------------------------------------------------------------------------------------------------------------------------------------------------------------------------------------------------------------------------------------------------------------------------------------------------------|
| ATM   | ataxia telangiectasia mutated                                                             | This protein functions as a regulator of a wide variety of downstream proteins, including tumor suppressor proteins p53 and BRCA1, checkpoint kinase CHK2, checkpoint proteins RAD17 and RAD9, and DNA repair protein NBS1. This protein and the closely related kinase ATR are thought to be master controllers of cell cycle checkpoint signaling pathways that are required for cell response to DNA damage and for genome stability. |
| BMP15 | bone morphogenetic protein 15                                                             | This protein may be involved in oocyte maturation and follicular development as a homodimer or by forming heterodimers with a related protein, Gdf9.                                                                                                                                                                                                                                                                                     |
| DMC1  | DMC1 dosage suppressor of mck1 homolog, meiosis-specific homologous recombination (yeast) | This protein is essential for meiotic homologous recombination.                                                                                                                                                                                                                                                                                                                                                                          |
| GDF9  | growth differentiation factor 9                                                           | Growth differentiation factor-9 (GDF9) is expressed in oocytes and is thought to be required for ovarian folliculogenesis.                                                                                                                                                                                                                                                                                                               |
| SPO11 | SPO11 meiotic protein covalently bound to DSB homolog ( <i>S. cerevisiae</i> )            | The protein encoded by this gene is similar in sequence and conserved features to the yeast meiotic recombination protein.                                                                                                                                                                                                                                                                                                               |

Organ Development:  
Morphogenesis:  
Morphogenesis of Organ  
(2.37E-03)

|         |                                                |                                                                                                                                                                                                                       |
|---------|------------------------------------------------|-----------------------------------------------------------------------------------------------------------------------------------------------------------------------------------------------------------------------|
| ABI2    | abl interactor 2                               |                                                                                                                                                                                                                       |
| ALDH1A3 | aldehyde dehydrogenase 1 family, member A3     | Aldehyde dehydrogenase isozymes are thought to play a major role in the detoxification of aldehydes generated by alcohol metabolism and lipid peroxidation.                                                           |
| BCL2    | B-cell CLL/lymphoma 2                          | This gene encodes an integral outer mitochondrial membrane protein that blocks the apoptotic death of some cells such as lymphocytes.                                                                                 |
| BMP7    | bone morphogenetic protein 7                   | Based on its expression early in embryogenesis, the BMP encoded by this gene has a proposed role in early development and possible bone inductive activity.                                                           |
| BMPR1B  | bone morphogenetic protein receptor, type IB   | The ligands of this receptor are BMPs, which are members of the TGF-beta superfamily. BMPs are involved in endochondral bone formation and embryogenesis.                                                             |
| CHD7    | chromodomain helicase DNA binding protein 7    | This gene encodes a protein that contains several helicase family domains.                                                                                                                                            |
| COL11A1 | collagen, type XI, alpha 1                     | This gene encodes one of the two alpha chains of type XI collagen, a minor fibrillar collagen. Type XI collagen is a heterotrimer but the third alpha chain is a post-translationally modified alpha 1 type II chain. |
| COL5A1  | collagen, type V, alpha 1                      | Type V collagen appears to regulate the assembly of heterotypic fibers composed of both type I and type V collagen.                                                                                                   |
| CRYGB   | crystallin, gamma B                            | Whether due to aging or mutations in specific genes, gamma-crystallins have been involved in cataract formation.                                                                                                      |
| CTNNA2  | catenin (cadherin-associated protein), alpha 2 |                                                                                                                                                                                                                       |
| DLC1    | deleted in liver cancer 1                      | It is suggested that this gene is a candidate tumor suppressor gene for human liver cancer, as well as for prostate, lung, colorectal, and breast cancers.                                                            |
| ESR1    | estrogen receptor 1                            | This gene encodes an estrogen receptor which are essential for sexual development and reproductive function, but also play a role in other tissues such as bone.                                                      |



|           |                                                                                              |                                                                                                                                                                                                                                                                                                                 |
|-----------|----------------------------------------------------------------------------------------------|-----------------------------------------------------------------------------------------------------------------------------------------------------------------------------------------------------------------------------------------------------------------------------------------------------------------|
| FGFR2     | fibroblast growth factor receptor 2                                                          | The extracellular portion of this protein interacts with fibroblast growth factors, setting in motion a cascade of downstream signals, ultimately influencing mitogenesis and differentiation.                                                                                                                  |
| FN1       | fibronectin 1                                                                                | Fibronectin is involved in cell adhesion and migration processes including embryogenesis, wound healing, blood coagulation, host defense, and metastasis.                                                                                                                                                       |
| FOXA1     | forkhead box A1                                                                              | These hepatocyte nuclear factors are transcriptional activators for liver-specific transcripts such as albumin and transthyretin, and they also interact with chromatin. Similar family members in mice have roles in the regulation of metabolism and in the differentiation of the pancreas and liver.        |
| FOXA2     | forkhead box A2                                                                              | These hepatocyte nuclear factors are transcriptional activators for liver-specific genes such as albumin and transthyretin, and they also interact with chromatin. Similar family members have roles in the regulation of metabolism and in the differentiation of the pancreas and liver.                      |
| GATA4     | GATA binding protein 4                                                                       | This protein is thought to regulate genes involved in embryogenesis and in myocardial differentiation and function.                                                                                                                                                                                             |
| GJB6      | gap junction protein, beta 6, 30kDa                                                          | This gene encodes one of the connexin proteins.                                                                                                                                                                                                                                                                 |
| GLI3      | GLI family zinc finger 3                                                                     | The protein encoded by this gene localizes in the cytoplasm, activates patched Drosophila homolog (PTCH) gene expression and plays a role during embryogenesis.                                                                                                                                                 |
| HOXC4     | homeobox C4                                                                                  | Homeobox transcription factors play an important role in morphogenesis in all multicellular organisms. This gene, HOXC4, is one of several homeobox HOXC genes located in a cluster on chromosome 12.                                                                                                           |
| IFT57     | intraflagellar transport 57 homolog (Chlamydomonas)                                          |                                                                                                                                                                                                                                                                                                                 |
| ITGB1     | integrin, beta 1 (fibronectin receptor, beta polypeptide, antigen CD29 includes MDF2, MSK12) | Integrin family members are membrane receptors involved in cell adhesion and recognition in a variety of processes including embryogenesis, hemostasis, tissue repair, immune response and metastatic diffusion of tumor cells.                                                                                 |
| LHCGR     | luteinizing hormone/choriogonadotropin receptor                                              | This gene encodes the receptor for both luteinizing hormone and choriogonadotropin.                                                                                                                                                                                                                             |
| MAB21L1   | mab-21-like 1 (C. elegans)                                                                   | This protein may be involved in eye and cerebellum development.                                                                                                                                                                                                                                                 |
| MAB21L2   | mab-21-like 2 (C. elegans)                                                                   | This gene may be involved in neural development.                                                                                                                                                                                                                                                                |
| MAP3K7IP1 | mitogen-activated protein kinase kinase kinase 7 interacting protein 1                       | This protein was identified as a regulator of the MAP kinase kinase kinase MAP3K7/TAK1, which is known to mediate various intracellular signaling pathways, such as those induced by TGF beta, interleukin 1, and WNT-1                                                                                         |
| MESP1     | mesoderm posterior 1 homolog (mouse)                                                         |                                                                                                                                                                                                                                                                                                                 |
| MSX1      | msh homeobox 1                                                                               | This protein functions as a transcriptional repressor during embryogenesis through interactions with components of the core transcription complex and other homeoproteins. It may also have roles in limb-pattern formation, craniofacial development, particularly odontogenesis, and tumor growth inhibition. |
| MYL7      | myosin, light chain 7, regulatory                                                            |                                                                                                                                                                                                                                                                                                                 |
| NF1       | neurofibromin 1                                                                              | This gene product appears to function as a negative regulator of the ras signal transduction pathway.                                                                                                                                                                                                           |
| NOG       | noggin                                                                                       | This protein may have a principal role in creating morphogenic gradients, and in numerous developmental processes, such as neural tube fusion and joint formation.                                                                                                                                              |

|                                                                    |                                                      |                                                                                                                                                                                                                                                                                                                                                                              |
|--------------------------------------------------------------------|------------------------------------------------------|------------------------------------------------------------------------------------------------------------------------------------------------------------------------------------------------------------------------------------------------------------------------------------------------------------------------------------------------------------------------------|
| NR2E1                                                              | nuclear receptor subfamily 2, group E, member 1      |                                                                                                                                                                                                                                                                                                                                                                              |
| PAX2                                                               | paired box 2                                         | PAX2 is believed to be a target of transcriptional suppression by the tumor suppressor gene WT1.                                                                                                                                                                                                                                                                             |
| PTEN                                                               | phosphatase and tensin homolog                       | This protein preferentially dephosphorylates phosphoinositide substrates. It negatively regulates intracellular levels of phosphatidylinositol-3,4,5-trisphosphate in cells and functions as a tumor suppressor by negatively regulating AKT/PKB signaling pathway.                                                                                                          |
| SMO                                                                | smoothened homolog (Drosophila)                      |                                                                                                                                                                                                                                                                                                                                                                              |
| SOX2                                                               | SRY (sex determining region Y)-box 2                 | This protein is required for stem-cell maintenance in the central nervous system, and also regulates gene expression in the stomach.                                                                                                                                                                                                                                         |
| STX2                                                               | syntaxin 2                                           | The product of this gene regulates epithelial-mesenchymal interactions and epithelial cell morphogenesis and activation.                                                                                                                                                                                                                                                     |
| TP63                                                               | tumor protein p63                                    | This protein plays a role in the development and maintenance of stratified epithelial tissues. p63 <sup>-/-</sup> mice have several developmental defects which include the lack of limbs and other tissues, such as teeth and mammary glands, which develop as a result of interactions between mesenchyme and epithelium.                                                  |
| TTN                                                                | titin                                                | This gene encodes a large abundant protein of striated muscle. Titin also contains binding sites for muscle associated proteins so it serves as an adhesion template for the assembly of contractile machinery in muscle cells. It has also been identified as a structural protein for chromosomes.                                                                         |
| WT1                                                                | Wilms tumor 1                                        | This protein has an essential role in the normal development of the urogenital system, and it is mutated in a small subset of patients with Wilm's tumors.                                                                                                                                                                                                                   |
| ZIC3                                                               | Zic family member 3 (odd-paired homolog, Drosophila) | This nuclear protein probably functions as a transcription factor in early stages of left-right body axis formation.                                                                                                                                                                                                                                                         |
| <hr/>                                                              |                                                      |                                                                                                                                                                                                                                                                                                                                                                              |
| Organ Development:<br>Growth: Growth of<br>Thymus Gland (9.23E-03) | FGF7                                                 | fibroblast growth factor 7 (keratinocyte growth factor)<br><br>This protein is an epithelial cell-specific growth factor, whose mitogenic activity is exhibited in keratinocytes but not in fibroblasts and endothelial cells. It may also be implicated roles in morphogenesis of epithelium, reepithelialization of wounds, hair development and early lung organogenesis. |
|                                                                    | FGF10                                                | fibroblast growth factor 10<br><br>This protein exhibits mitogenic activity for keratinizing epidermal cells, but essentially no activity for fibroblasts. It may be required for embryonic epidermal morphogenesis including brain development, lung morphogenesis, and initiation of limb bud formation. It is also implicated to be a primary factor in wound healing.    |
|                                                                    | FGFR2                                                | fibroblast growth factor receptor 2<br><br>The extracellular portion of this protein interacts with fibroblast growth factors, setting in motion a cascade of downstream signals, ultimately influencing mitogenesis and differentiation.                                                                                                                                    |
|                                                                    | PIM1                                                 | pim-1 oncogene<br><br>The protooncogene PIM1 encodes a protein kinase upregulated in prostate cancer.                                                                                                                                                                                                                                                                        |

Nervous System  
Development and  
Function:

Neurotransmission:  
Neurotransmission  
(1.81E-09) *including*  
Neurotransmission of  
Cells (2.60E-03),  
Neurotransmission of  
Normal Cells (3.37E-03),  
Neurotransmission of  
Neurons (1.00E-02),  
Neurotransmission of  
Synapse (1.40E-02)

|         |                                                              |                                                                                                                                                                                                                                        |
|---------|--------------------------------------------------------------|----------------------------------------------------------------------------------------------------------------------------------------------------------------------------------------------------------------------------------------|
| ALS2    | amyotrophic lateral sclerosis 2 (juvenile)                   | The protein functions as a guanine nucleotide exchange factor for the small GTPase RAB5.                                                                                                                                               |
| ATXN3   | ataxin 3                                                     | The protein encoded by this gene contains (CAG) <sub>n</sub> repeats in the coding region, and the expansion of these repeats from the normal 13-36 to 68-79 is the cause of Machado-Joseph disease.                                   |
| BSN     | bassoon (presynaptic cytomatrix protein)                     | The protein encoded by this gene is thought to be a scaffolding protein involved in organizing the presynaptic cytoskeleton, primarily in neurons in the brain.                                                                        |
| CACNA1C | calcium channel, voltage-dependent, L type, alpha 1C subunit | This gene encodes an alpha-1 subunit of a voltage-dependent calcium channel. Calcium channels mediate the influx of calcium ions into the cell upon membrane polarization.                                                             |
| CACNA1E | calcium channel, voltage-dependent, R type, alpha 1E subunit | This gene encodes an alpha-1 subunit of a voltage-dependent calcium channel.                                                                                                                                                           |
| CACNB2  | calcium channel, voltage-dependent, beta 2 subunit           |                                                                                                                                                                                                                                        |
| CD24    | CD24 molecule                                                | This gene encodes a sialoglycoprotein that is expressed on mature granulocytes and in many B cells.                                                                                                                                    |
| CHRM1   | cholinergic receptor, muscarinic 1                           | The muscarinic cholinergic receptor 1 is involved in mediation of vagally-induced bronchoconstriction and in the acid secretion of the gastrointestinal tract.                                                                         |
| CHRM3   | cholinergic receptor, muscarinic 3                           | The muscarinic cholinergic receptor 3 controls smooth muscle contraction and its stimulation causes secretion of glandular tissue.                                                                                                     |
| CHRNA7  | cholinergic receptor, nicotinic, alpha 7                     | The protein encoded by this gene forms a homo-oligomeric channel, displays marked permeability to calcium ions and is a major component of brain nicotinic receptors that are blocked by, and highly sensitive to, alpha-bungarotoxin. |
| CHRNB2  | cholinergic receptor, nicotinic, beta 2 (neuronal)           | The protein encoded by this gene belongs to a superfamily of ligand-gated ion channels which allow the flow of sodium and potassium across the plasma membrane in response to ligands such as acetylcholine and nicotine.              |
| CHRNB3  | cholinergic receptor, nicotinic, beta 3                      |                                                                                                                                                                                                                                        |

|        |                                                                |                                                                                                                                                                                                                                                                    |
|--------|----------------------------------------------------------------|--------------------------------------------------------------------------------------------------------------------------------------------------------------------------------------------------------------------------------------------------------------------|
| CNR1   | cannabinoid receptor 1 (brain)                                 | This gene encodes one of two cannabinoid receptors, which have been found to be involved in the cannabinoid-induced CNS effects (including alterations in mood and cognition) experienced by users of marijuana.                                                   |
| CRH    | corticotropin releasing hormone                                | CRH is secreted by the paraventricular nucleus (PVN) of the hypothalamus in response to stress. In the placenta CRH is a marker that determines the length of gestation and the timing of parturition and delivery. CRH may also act as a trigger for parturition. |
| DLG4   | discs, large homolog 4 (Drosophila)                            | This MAGUK protein may interact at postsynaptic sites to form a multimeric scaffold for the clustering of receptors, ion channels, and associated signaling proteins.                                                                                              |
| DLGAP1 | discs, large (Drosophila) homolog-associated protein 1         |                                                                                                                                                                                                                                                                    |
| DRD4   | dopamine receptor D4                                           | The D4 subtype of the dopamine receptor inhibits adenylyl cyclase.                                                                                                                                                                                                 |
| DTNA   | dystrobrevin, alpha                                            | This protein is a component of the dystrophin-associated protein complex (DPC), which localizes to the sarcolemma and its disruption is associated with various forms of muscular dystrophy.                                                                       |
| FGF2   | fibroblast growth factor 2 (basic)                             | The CUG-initiated isoforms of this gene are localized in the nucleus and are responsible for the intracrine effect, whereas, the AUG-initiated form is mostly cytosolic and is responsible for the paracrine and autocrine effects of this FGF.                    |
| GABRB2 | gamma-aminobutyric acid (GABA) A receptor, beta 2              | The gamma-aminobutyric acid (GABA) A receptor is a multisubunit chloride channel that mediates the fastest inhibitory synaptic transmission in the central nervous system.                                                                                         |
| GABRG1 | gamma-aminobutyric acid (GABA) A receptor, gamma 1             | The protein is an integral membrane protein and plays an important role in inhibiting neurotransmission by binding to the benzodiazepine receptor and opening an integral chloride channel.                                                                        |
| GABRG2 | gamma-aminobutyric acid (GABA) A receptor, gamma 2             | This gene encodes a gamma-aminobutyric acid (GABA) receptor. GABA is the major inhibitory neurotransmitter in the mammalian brain.                                                                                                                                 |
| GAD1   | glutamate decarboxylase 1 (brain, 67kDa)                       | The enzyme encoded is responsible for catalyzing the production of gamma-aminobutyric acid from L-glutamic acid.                                                                                                                                                   |
| GAD2   | glutamate decarboxylase 2 (pancreatic islets and brain, 65kDa) | This gene encodes one of several forms of glutamic acid decarboxylase, identified as a major autoantigen in insulin-dependent diabetes.                                                                                                                            |
| GALR3  | galanin receptor 3                                             | The neuropeptide galanin modulates a variety of physiologic processes including cognition/memory, sensory/pain processing, hormone secretion, and feeding behavior.                                                                                                |
| GJC1   | gap junction protein, gamma 1, 45kDa                           | The encoded protein is a component of gap junctions, which are composed of arrays of intercellular channels that provide a route for the diffusion of low molecular weight materials from cell to cell.                                                            |
| GJD2   | gap junction protein, delta 2, 36kDa                           | This gene is a member of the connexin gene family that is expressed predominantly in mammalian neurons.                                                                                                                                                            |
| GLS    | glutaminase                                                    | This protein is the major enzyme yielding glutamate from glutamine, and is implicated in behavior disturbances in which glutamate acts as a neurotransmitter (Prusiner, 1981).                                                                                     |
| GPR176 | G protein-coupled receptor 176                                 | Members of the G protein-coupled receptor family, such as GPR176, are cell surface receptors involved in responses to hormones, growth factors, and neurotransmitters.                                                                                             |

|        |                                                                         |                                                                                                                                                                                                                                                                                                                             |
|--------|-------------------------------------------------------------------------|-----------------------------------------------------------------------------------------------------------------------------------------------------------------------------------------------------------------------------------------------------------------------------------------------------------------------------|
| GRIA2  | glutamate receptor, ionotropic, AMPA 2                                  | Glutamate receptors are the predominant excitatory neurotransmitter receptors in the mammalian brain and are activated in a variety of normal neurophysiologic processes. This protein functions as ligand-activated cation channels.                                                                                       |
| GRIA3  | glutamate receptor, ionotropic, AMPA 3                                  | Glutamate receptors are the predominant excitatory neurotransmitter receptors in the mammalian brain and are activated in a variety of normal neurophysiologic processes.                                                                                                                                                   |
| GRIA4  | glutamate receptor, ionotropic, AMPA 4                                  | Glutamate receptors are the predominant excitatory neurotransmitter receptors in the mammalian brain and are activated in a variety of normal neurophysiologic processes.                                                                                                                                                   |
| GRIK2  | glutamate receptor, ionotropic, kainate 2                               | This gene product belongs to the kainate family of glutamate receptors, which are composed of four subunits and function as ligand-activated ion channels.                                                                                                                                                                  |
| GRIK4  | glutamate receptor, ionotropic, kainate 4                               | This gene encodes a protein that belongs to the glutamate-gated ionic channel family. Glutamate functions as the major excitatory neurotransmitter in the CNS.                                                                                                                                                              |
| GRIN2A | glutamate receptor, ionotropic, N-methyl D-aspartate 2A                 | These receptors have been shown to be involved in long-term potentiation, an activity-dependent increase in the efficiency of synaptic transmission thought to underlie certain kinds of memory and learning.                                                                                                               |
| GRIN2B | glutamate receptor, ionotropic, N-methyl D-aspartate 2B                 | This NMDA receptor channel has been shown to be involved in long-term potentiation, an activity-dependent increase in the efficiency of synaptic transmission thought to underlie certain kinds of memory and learning.                                                                                                     |
| GRM2   | glutamate receptor, metabotropic 2                                      | Glutamatergic neurotransmission is involved in most aspects of normal brain function and can be perturbed in many neuropathologic conditions. GRM2 and GRM3 are linked to the inhibition of the cyclic AMP cascade but differ in their agonist selectivities.                                                               |
| GRM3   | glutamate receptor, metabotropic 3                                      | L-glutamate is the major excitatory neurotransmitter in the central nervous system and activates both ionotropic and metabotropic glutamate receptors. GRM3 is linked to the inhibition of the cyclic AMP cascade.                                                                                                          |
| GRM7   | glutamate receptor, metabotropic 7                                      | Glutamatergic neurotransmission is involved in most aspects of normal brain function and can be perturbed in many neuropathologic conditions. GRM4, GRM6, GRM7 and GRM8 are linked to the inhibition of the cyclic AMP cascade but differ in their agonist selectivities.                                                   |
| GRM8   | glutamate receptor, metabotropic 8                                      | Glutamatergic neurotransmission is involved in most aspects of normal brain function. Group III receptors include GRM8, and are linked to the inhibition of the cyclic AMP cascade.                                                                                                                                         |
| HCN4   | hyperpolarization activated cyclic nucleotide-gated potassium channel 4 | This protein shows slow kinetics of activation and inactivation, and is necessary for the cardiac pacemaking process. It may also mediate responses to sour stimuli.                                                                                                                                                        |
| HCRTR2 | hypocretin (orexin) receptor 2                                          | The protein encoded by this gene is involved in the regulation of feeding behavior. The encoded protein binds the hypothalamic neuropeptides orexin A and orexin B.                                                                                                                                                         |
| HTR4   | 5-hydroxytryptamine (serotonin) receptor 4                              | This gene is a member of the family of serotonin receptors, which stimulate cAMP production in response to serotonin (5-hydroxytryptamine). The gene product is a glycosylated transmembrane protein that functions in both the peripheral and central nervous system to modulate the release of various neurotransmitters. |
| HTR6   | 5-hydroxytryptamine (serotonin) receptor 6                              |                                                                                                                                                                                                                                                                                                                             |
| HTR1A  | 5-hydroxytryptamine (serotonin) receptor 1A                             |                                                                                                                                                                                                                                                                                                                             |

|                |                                                                                    |                                                                                                                                                                                                                                                                                                                 |
|----------------|------------------------------------------------------------------------------------|-----------------------------------------------------------------------------------------------------------------------------------------------------------------------------------------------------------------------------------------------------------------------------------------------------------------|
| HTR1D          | 5-hydroxytryptamine (serotonin) receptor 1D                                        |                                                                                                                                                                                                                                                                                                                 |
| HTR2C          | 5-hydroxytryptamine (serotonin) receptor 2C                                        | Serotonin (5-hydroxytryptamine, 5-HT), a neurotransmitter, elicits a wide array of physiological effects by binding to several receptor subtypes, including the 5-HT <sub>2</sub> family of seven-transmembrane-spanning, G-protein-coupled receptors, which activate phospholipase C and D signaling pathways. |
| HTR3A          | 5-hydroxytryptamine (serotonin) receptor 3A                                        | This receptor causes fast, depolarizing responses in neurons after activation.                                                                                                                                                                                                                                  |
| KCNMA1         | potassium large conductance calcium-activated channel, subfamily M, alpha member 1 | MaxiK channels are large conductance, voltage and calcium-sensitive potassium channels which are fundamental to the control of smooth muscle tone and neuronal excitability.                                                                                                                                    |
| KCNMB4         | potassium large conductance calcium-activated channel, subfamily M, beta member 4  | This large conductance, voltage and calcium-sensitive potassium channel protein slows activation kinetics, leads to steeper calcium sensitivity, and shifts the voltage range of current activation to more negative potentials.                                                                                |
| KCNQ2          | potassium voltage-gated channel, KQT-like subfamily, member 2                      | The M channel is a slowly activating and deactivating potassium channel that plays a critical role in the regulation of neuronal excitability.                                                                                                                                                                  |
| KCNQ5          | potassium voltage-gated channel, KQT-like subfamily, member 5                      | This protein yields currents that activate slowly with depolarization and can form heteromeric channels with the protein encoded by the KCNQ3 gene. Currents expressed from this protein have voltage dependences and inhibitor sensitivities in common with M-currents.                                        |
| MYO5A          | myosin VA (heavy chain 12, myoxin)                                                 | Myosin V is a class of actin-based motor proteins involved in cytoplasmic vesicle transport and anchorage, spindle-pole alignment and mRNA translocation. The protein encoded by this gene is abundant in melanocytes and nerve cells.                                                                          |
| NLGN1          | neuroligin 1                                                                       | Members of this family may act as splice site-specific ligands for beta-neurexins and may be involved in the formation and remodeling of central nervous system synapses.                                                                                                                                       |
| NLGN3          | neuroligin 3                                                                       | This gene encodes a member of a family of neuronal cell surface proteins. Members of this family may act as splice site-specific ligands for beta-neurexins and may be involved in the formation and remodeling of central nervous system synapses.                                                             |
| NOVA1          | neuro-oncological ventral antigen 1                                                | This gene encodes a neuron-specific RNA-binding protein, a member of the Nova family of paraneoplastic disease antigens, that is recognized and inhibited by paraneoplastic antibodies.                                                                                                                         |
| NQO1           | NAD(P)H dehydrogenase, quinone 1                                                   | This FAD-binding protein forms homodimers and reduces quinones to hydroquinones. This protein's enzymatic activity prevents the one electron reduction of quinones that results in the production of radical species.                                                                                           |
| NRXN1<br>OPRK1 | neurexin 1<br>opioid receptor, kappa 1                                             | Neurexins function in the vertebrate nervous system as cell adhesion molecules and receptors.                                                                                                                                                                                                                   |
| P2RX2          | purinergic receptor P2X, ligand-gated ion channel, 2                               | The product of this gene belongs to the family of purinoceptors for ATP. This receptor functions as a ligand-gated ion channel. Binding to ATP mediates synaptic transmission between neurons and from neurons to smooth muscle.                                                                                |

|         |                                                                                         |                                                                                                                                                                                                                                                                                                                                        |
|---------|-----------------------------------------------------------------------------------------|----------------------------------------------------------------------------------------------------------------------------------------------------------------------------------------------------------------------------------------------------------------------------------------------------------------------------------------|
| PARK2   | Parkinson disease (autosomal recessive, juvenile) 2, parkin                             | The encoded protein is a component of a multiprotein E3 ubiquitin ligase complex that mediates the targeting of substrate proteins for proteasomal degradation.                                                                                                                                                                        |
| PCDHB3  | protocadherin beta 3                                                                    | The specific functions of these neural cadherin-like cell adhesion proteins are unknown but they most likely play a critical role in the establishment and function of specific cell-cell neural connections.                                                                                                                          |
| PCDHB5  | protocadherin beta 5                                                                    | The specific functions of these neural cadherin-like cell adhesion proteins are unknown but they most likely play a critical role in the establishment and function of specific cell-cell neural connections.                                                                                                                          |
| PCDHB10 | protocadherin beta 10                                                                   | The specific functions of these neural cadherin-like cell adhesion proteins are unknown but they most likely play a critical role in the establishment and function of specific cell-cell neural connections.                                                                                                                          |
| PCDHB13 | protocadherin beta 13                                                                   | The specific functions of these neural cadherin-like cell adhesion proteins are unknown but they most likely play a critical role in the establishment and function of specific cell-cell neural connections.                                                                                                                          |
| PCDHB11 | protocadherin beta 11                                                                   | The specific functions of these neural cadherin-like cell adhesion proteins are unknown but they most likely play a critical role in the establishment and function of specific cell-cell neural connections.                                                                                                                          |
| PCDHB4  | protocadherin beta 4                                                                    | The specific functions of these neural cadherin-like cell adhesion proteins are unknown but they most likely play a critical role in the establishment and function of specific cell-cell neural connections.                                                                                                                          |
| PCDHB9  | protocadherin beta 9                                                                    | The specific functions of these neural cadherin-like cell adhesion proteins are unknown but they most likely play a critical role in the establishment and function of specific cell-cell neural connections.                                                                                                                          |
| PRPH2   | peripherin 2 (retinal degeneration, slow)                                               | This encoded protein is a cell surface glycoprotein found in the outer segment of both rod and cone photoreceptor cells. It may function as an adhesion molecule involved in stabilization and compaction of outer segment disks or in the maintenance of the curvature of the rim.                                                    |
| PTK2    | PTK2 protein tyrosine kinase 2                                                          | Activation of this gene may be an important early step in cell growth and intracellular signal transduction pathways triggered in response to certain neural peptides or to cell interactions with the extracellular matrix.                                                                                                           |
| PYY     | peptide YY                                                                              |                                                                                                                                                                                                                                                                                                                                        |
| RIMS1   | regulating synaptic membrane exocytosis 1                                               | The RIM family of active zone proteins likely function as protein scaffolds that help regulate vesicle exocytosis during short-term plasticity.                                                                                                                                                                                        |
| RIT2    | Ras-like without CAAX 2                                                                 | RIN belongs to the RAS (HRAS; MIM 190020) superfamily of small GTPases.                                                                                                                                                                                                                                                                |
| SLC17A1 | solute carrier family 17 (sodium phosphate), member 1                                   |                                                                                                                                                                                                                                                                                                                                        |
| SLC17A7 | solute carrier family 17 (sodium-dependent inorganic phosphate cotransporter), member 7 | This protein is a vesicle-bound, sodium-dependent phosphate transporter specifically expressed in the neuron-rich regions of the brain. It is associated with the membranes of synaptic vesicles and functions in glutamate transport.                                                                                                 |
| SLC1A2  | solute carrier family 1 (glial high affinity glutamate transporter), member 2           | The membrane-bound protein is the principal transporter that clears the excitatory neurotransmitter glutamate from the extracellular space at synapses in the central nervous system. Glutamate clearance is necessary for proper synaptic activation and to prevent neuronal damage from excessive activation of glutamate receptors. |
| SLC1A6  | solute carrier family 1 (high affinity aspartate/glutamate transporter), member 6       |                                                                                                                                                                                                                                                                                                                                        |

|        |                                                                                |                                                                                                                                                                                                                                  |
|--------|--------------------------------------------------------------------------------|----------------------------------------------------------------------------------------------------------------------------------------------------------------------------------------------------------------------------------|
| SLC5A7 | solute carrier family 5 (choline transporter), member 7                        | SLC5A7 is a Na(+)- and Cl(-)- dependent high-affinity transporter that mediates the uptake of choline for acetylcholine synthesis in cholinergic neurons.                                                                        |
| SLC6A2 | solute carrier family 6 (neurotransmitter transporter, noradrenalin), member 2 | The SLC6A2 gene encodes a norepinephrine (noradrenaline) transporter, which is responsible for reuptake of norepinephrine into presynaptic nerve terminals and is a regulator of norepinephrine homeostasis.                     |
| SLC8A3 | solute carrier family 8 (sodium/calcium exchanger), member 3                   | The protein is regulated by intracellular calcium ions and is found in both the plasma membrane and intracellular organellar membranes, where exchange of Na <sup>+</sup> for Ca <sup>2+</sup> occurs in an electrogenic manner. |
| SRI    | sorcini                                                                        |                                                                                                                                                                                                                                  |
| SV2A   | synaptic vesicle glycoprotein 2A                                               |                                                                                                                                                                                                                                  |
| SV2B   | synaptic vesicle glycoprotein 2B                                               |                                                                                                                                                                                                                                  |
| SYN2   | synapsin II                                                                    | This neuron-specific phosphoprotein selectively binds to small synaptic vesicles in the presynaptic nerve terminal.                                                                                                              |
| SYP    | synaptophysin                                                                  | Synaptophysin (p38) is an integral membrane protein of small synaptic vesicles in brain and endocrine cells.                                                                                                                     |
| SYT5   | synaptotagmin V                                                                |                                                                                                                                                                                                                                  |
| TH     | tyrosine hydroxylase                                                           | The protein encoded by this gene is involved in the conversion of tyrosine to dopamine. It is the rate-limiting enzyme in the synthesis of catecholamines, hence plays a key role in the physiology of adrenergic neurons.       |
| UNC13C | unc-13 homolog C (C. elegans)                                                  |                                                                                                                                                                                                                                  |
| UTS2   | urotensin 2                                                                    | This gene encodes a mature peptide that is an active cyclic heptapeptide absolutely conserved from lamprey to human. The active peptide acts as a vasoconstrictor and is expressed only in brain tissue.                         |

Nervous System  
Development and  
Function: Synaptic  
Transmission: Synaptic  
Transmission (2.21E-09)  
*including* Synaptic  
Transmission of Cells  
(1.23E-02), Synaptic  
Transmission of Normal  
Cells (1.65E-02)

|       |                                            |                                                                                                                                                                                                      |
|-------|--------------------------------------------|------------------------------------------------------------------------------------------------------------------------------------------------------------------------------------------------------|
| ALS2  | amyotrophic lateral sclerosis 2 (juvenile) | The protein functions as a guanine nucleotide exchange factor for the small GTPase RAB5.                                                                                                             |
| ATXN3 | ataxin 3                                   | The protein encoded by this gene contains (CAG) <sub>n</sub> repeats in the coding region, and the expansion of these repeats from the normal 13-36 to 68-79 is the cause of Machado-Joseph disease. |
| BSN   | bassoon (presynaptic cytomatrix protein)   | The protein encoded by this gene is thought to be a scaffolding protein involved in organizing the presynaptic cytoskeleton, primarily in neurons in the brain.                                      |



|         |                                                              |                                                                                                                                                                                                                                                                    |
|---------|--------------------------------------------------------------|--------------------------------------------------------------------------------------------------------------------------------------------------------------------------------------------------------------------------------------------------------------------|
| CACNA1C | calcium channel, voltage-dependent, L type, alpha 1C subunit | This gene encodes an alpha-1 subunit of a voltage-dependent calcium channel. Calcium channels mediate the influx of calcium ions into the cell upon membrane polarization.                                                                                         |
| CACNA1E | calcium channel, voltage-dependent, R type, alpha 1E subunit | This gene encodes an alpha-1 subunit of a voltage-dependent calcium channel.                                                                                                                                                                                       |
| CACNB2  | calcium channel, voltage-dependent, beta 2 subunit           |                                                                                                                                                                                                                                                                    |
| CD24    | CD24 molecule                                                | This gene encodes a sialoglycoprotein that is expressed on mature granulocytes and in many B cells.                                                                                                                                                                |
| CHRM1   | cholinergic receptor, muscarinic 1                           | The muscarinic cholinergic receptor 1 is involved in mediation of vagally-induced bronchoconstriction and in the acid secretion of the gastrointestinal tract.                                                                                                     |
| CHRM3   | cholinergic receptor, muscarinic 3                           | The muscarinic cholinergic receptor 3 controls smooth muscle contraction and its stimulation causes secretion of glandular tissue.                                                                                                                                 |
| CHRNA7  | cholinergic receptor, nicotinic, alpha 7                     | The protein encoded by this gene forms a homo-oligomeric channel, displays marked permeability to calcium ions and is a major component of brain nicotinic receptors that are blocked by, and highly sensitive to, alpha-bungarotoxin.                             |
| CHRNB2  | cholinergic receptor, nicotinic, beta 2 (neuronal)           | The protein encoded by this gene belongs to a superfamily of ligand-gated ion channels which allow the flow of sodium and potassium across the plasma membrane in response to ligands such as acetylcholine and nicotine.                                          |
| CHRNB3  | cholinergic receptor, nicotinic, beta 3                      |                                                                                                                                                                                                                                                                    |
| CNR1    | cannabinoid receptor 1 (brain)                               | This gene encodes one of two cannabinoid receptors, which have been found to be involved in the cannabinoid-induced CNS effects (including alterations in mood and cognition) experienced by users of marijuana.                                                   |
| CRH     | corticotropin releasing hormone                              | CRH is secreted by the paraventricular nucleus (PVN) of the hypothalamus in response to stress. In the placenta CRH is a marker that determines the length of gestation and the timing of parturition and delivery. CRH may also act as a trigger for parturition. |
| DLG4    | discs, large homolog 4 (Drosophila)                          | This MAGUK protein may interact at postsynaptic sites to form a multimeric scaffold for the clustering of receptors, ion channels, and associated signaling proteins.                                                                                              |
| DLGAP1  | discs, large (Drosophila) homolog-associated protein 1       |                                                                                                                                                                                                                                                                    |
| DRD4    | dopamine receptor D4                                         | The D4 subtype of the dopamine receptor inhibits adenylyl cyclase.                                                                                                                                                                                                 |
| DTNA    | dystrobrevin, alpha                                          | This protein is a component of the dystrophin-associated protein complex (DPC), which localizes to the sarcolemma and its disruption is associated with various forms of muscular dystrophy.                                                                       |
| FGF2    | fibroblast growth factor 2 (basic)                           | The CUG-initiated isoforms of this gene are localized in the nucleus and are responsible for the intracrine effect, whereas, the AUG-initiated form is mostly cytosolic and is responsible for the paracrine and autocrine effects of this FGF.                    |
| GABRB2  | gamma-aminobutyric acid (GABA) A receptor, beta 2            | The gamma-aminobutyric acid (GABA) A receptor is a multisubunit chloride channel that mediates the fastest inhibitory synaptic transmission in the central nervous system.                                                                                         |

|        |                                                                |                                                                                                                                                                                                                                                               |
|--------|----------------------------------------------------------------|---------------------------------------------------------------------------------------------------------------------------------------------------------------------------------------------------------------------------------------------------------------|
| GABRG1 | gamma-aminobutyric acid (GABA) A receptor, gamma 1             | The protein is an integral membrane protein and plays an important role in inhibiting neurotransmission by binding to the benzodiazepine receptor and opening an integral chloride channel.                                                                   |
| GABRG2 | gamma-aminobutyric acid (GABA) A receptor, gamma 2             | This gene encodes a gamma-aminobutyric acid (GABA) receptor. GABA is the major inhibitory neurotransmitter in the mammalian brain.                                                                                                                            |
| GAD1   | glutamate decarboxylase 1 (brain, 67kDa)                       | The enzyme encoded is responsible for catalyzing the production of gamma-aminobutyric acid from L-glutamic acid.                                                                                                                                              |
| GAD2   | glutamate decarboxylase 2 (pancreatic islets and brain, 65kDa) | This gene encodes one of several forms of glutamic acid decarboxylase, identified as a major autoantigen in insulin-dependent diabetes.                                                                                                                       |
| GALR3  | galanin receptor 3                                             | The neuropeptide galanin modulates a variety of physiologic processes including cognition/memory, sensory/pain processing, hormone secretion, and feeding behavior.                                                                                           |
| GJC1   | gap junction protein, gamma 1, 45kDa                           | The encoded protein is a component of gap junctions, which are composed of arrays of intercellular channels that provide a route for the diffusion of low molecular weight materials from cell to cell.                                                       |
| GJD2   | gap junction protein, delta 2, 36kDa                           | This gene is a member of the connexin gene family that is expressed predominantly in mammalian neurons.                                                                                                                                                       |
| GLS    | glutaminase                                                    | This protein is the major enzyme yielding glutamate from glutamine, and is implicated in behavior disturbances in which glutamate acts as a neurotransmitter (Prusiner, 1981).                                                                                |
| GPR176 | G protein-coupled receptor 176                                 | Members of the G protein-coupled receptor family, such as GPR176, are cell surface receptors involved in responses to hormones, growth factors, and neurotransmitters.                                                                                        |
| GRIA2  | glutamate receptor, ionotropic, AMPA 2                         | Glutamate receptors are the predominant excitatory neurotransmitter receptors in the mammalian brain and are activated in a variety of normal neurophysiologic processes. This protein functions as ligand-activated cation channels.                         |
| GRIA3  | glutamate receptor, ionotropic, AMPA 3                         | Glutamate receptors are the predominant excitatory neurotransmitter receptors in the mammalian brain and are activated in a variety of normal neurophysiologic processes.                                                                                     |
| GRIA4  | glutamate receptor, ionotropic, AMPA 4                         | Glutamate receptors are the predominant excitatory neurotransmitter receptors in the mammalian brain and are activated in a variety of normal neurophysiologic processes.                                                                                     |
| GRIK2  | glutamate receptor, ionotropic, kainate 2                      | This gene product belongs to the kainate family of glutamate receptors, which are composed of four subunits and function as ligand-activated ion channels.                                                                                                    |
| GRIK4  | glutamate receptor, ionotropic, kainate 4                      | This gene encodes a protein that belongs to the glutamate-gated ionic channel family. Glutamate functions as the major excitatory neurotransmitter in the CNS.                                                                                                |
| GRIN2A | glutamate receptor, ionotropic, N-methyl D-aspartate 2A        | These receptors have been shown to be involved in long-term potentiation, an activity-dependent increase in the efficiency of synaptic transmission thought to underlie certain kinds of memory and learning.                                                 |
| GRIN2B | glutamate receptor, ionotropic, N-methyl D-aspartate 2B        | This NMDA receptor channel has been shown to be involved in long-term potentiation, an activity-dependent increase in the efficiency of synaptic transmission thought to underlie certain kinds of memory and learning.                                       |
| GRM2   | glutamate receptor, metabotropic 2                             | Glutamatergic neurotransmission is involved in most aspects of normal brain function and can be perturbed in many neuropathologic conditions. GRM2 and GRM3 are linked to the inhibition of the cyclic AMP cascade but differ in their agonist selectivities. |

|        |                                                                                    |                                                                                                                                                                                                                                                                                                                             |
|--------|------------------------------------------------------------------------------------|-----------------------------------------------------------------------------------------------------------------------------------------------------------------------------------------------------------------------------------------------------------------------------------------------------------------------------|
| GRM3   | glutamate receptor, metabotropic 3                                                 | L-glutamate is the major excitatory neurotransmitter in the central nervous system and activates both ionotropic and metabotropic glutamate receptors. GRM3 is linked to the inhibition of the cyclic AMP cascade.                                                                                                          |
| GRM7   | glutamate receptor, metabotropic 7                                                 | Glutamatergic neurotransmission is involved in most aspects of normal brain function and can be perturbed in many neuropathologic conditions. GRM4, GRM6, GRM7 and GRM8 are linked to the inhibition of the cyclic AMP cascade but differ in their agonist selectivities.                                                   |
| GRM8   | glutamate receptor, metabotropic 8                                                 | Glutamatergic neurotransmission is involved in most aspects of normal brain function. Group III receptors include GRM8, and are linked to the inhibition of the cyclic AMP cascade.                                                                                                                                         |
| HCN4   | hyperpolarization activated cyclic nucleotide-gated potassium channel 4            | This protein shows slow kinetics of activation and inactivation, and is necessary for the cardiac pacemaking process. It may also mediate responses to sour stimuli.                                                                                                                                                        |
| HCRTR2 | hypocretin (orexin) receptor 2                                                     | The protein encoded by this gene is involved in the regulation of feeding behavior. The encoded protein binds the hypothalamic neuropeptides orexin A and orexin B.                                                                                                                                                         |
| HTR4   | 5-hydroxytryptamine (serotonin) receptor 4                                         | This gene is a member of the family of serotonin receptors, which stimulate cAMP production in response to serotonin (5-hydroxytryptamine). The gene product is a glycosylated transmembrane protein that functions in both the peripheral and central nervous system to modulate the release of various neurotransmitters. |
| HTR6   | 5-hydroxytryptamine (serotonin) receptor 6                                         |                                                                                                                                                                                                                                                                                                                             |
| HTR1A  | 5-hydroxytryptamine (serotonin) receptor 1A                                        |                                                                                                                                                                                                                                                                                                                             |
| HTR1D  | 5-hydroxytryptamine (serotonin) receptor 1D                                        |                                                                                                                                                                                                                                                                                                                             |
| HTR2C  | 5-hydroxytryptamine (serotonin) receptor 2C                                        | Serotonin (5-hydroxytryptamine, 5-HT), a neurotransmitter, elicits a wide array of physiological effects by binding to several receptor subtypes, including the 5-HT2 family of seven-transmembrane-spanning, G-protein-coupled receptors, which activate phospholipase C and D signaling pathways.                         |
| HTR3A  | 5-hydroxytryptamine (serotonin) receptor 3A                                        | This receptor causes fast, depolarizing responses in neurons after activation.                                                                                                                                                                                                                                              |
| KCNMA1 | potassium large conductance calcium-activated channel, subfamily M, alpha member 1 | MaxiK channels are large conductance, voltage and calcium-sensitive potassium channels which are fundamental to the control of smooth muscle tone and neuronal excitability.                                                                                                                                                |
| KCNMB4 | potassium large conductance calcium-activated channel, subfamily M, beta member 4  | This large conductance, voltage and calcium-sensitive potassium channel protein slows activation kinetics, leads to steeper calcium sensitivity, and shifts the voltage range of current activation to more negative potentials.                                                                                            |
| KCNQ2  | potassium voltage-gated channel, KQT-like subfamily, member 2                      | The M channel is a slowly activating and deactivating potassium channel that plays a critical role in the regulation of neuronal excitability.                                                                                                                                                                              |

|                |                                                               |                                                                                                                                                                                                                                                                                     |
|----------------|---------------------------------------------------------------|-------------------------------------------------------------------------------------------------------------------------------------------------------------------------------------------------------------------------------------------------------------------------------------|
| KCNQ5          | potassium voltage-gated channel, KQT-like subfamily, member 5 | This protein yields currents that activate slowly with depolarization and can form heteromeric channels with the protein encoded by the KCNQ3 gene. Currents expressed from this protein have voltage dependences and inhibitor sensitivities in common with M-currents.            |
| MYO5A          | myosin VA (heavy chain 12, myoxin)                            | Myosin V is a class of actin-based motor proteins involved in cytoplasmic vesicle transport and anchorage, spindle-pole alignment and mRNA translocation. The protein encoded by this gene is abundant in melanocytes and nerve cells.                                              |
| NLGN1          | neuroligin 1                                                  | Members of this family may act as splice site-specific ligands for beta-neurexins and may be involved in the formation and remodeling of central nervous system synapses.                                                                                                           |
| NLGN3          | neuroligin 3                                                  | This gene encodes a member of a family of neuronal cell surface proteins. Members of this family may act as splice site-specific ligands for beta-neurexins and may be involved in the formation and remodeling of central nervous system synapses.                                 |
| NOVA1          | neuro-oncological ventral antigen 1                           | This gene encodes a neuron-specific RNA-binding protein, a member of the Nova family of paraneoplastic disease antigens, that is recognized and inhibited by paraneoplastic antibodies.                                                                                             |
| NQO1           | NAD(P)H dehydrogenase, quinone 1                              | This FAD-binding protein forms homodimers and reduces quinones to hydroquinones. This protein's enzymatic activity prevents the one electron reduction of quinones that results in the production of radical species.                                                               |
| NRXN1<br>OPRK1 | neurexin 1<br>opioid receptor, kappa 1                        | Neurexins function in the vertebrate nervous system as cell adhesion molecules and receptors.                                                                                                                                                                                       |
| P2RX2          | purinergic receptor P2X, ligand-gated ion channel, 2          | The product of this gene belongs to the family of purinoceptors for ATP. This receptor functions as a ligand-gated ion channel. Binding to ATP mediates synaptic transmission between neurons and from neurons to smooth muscle.                                                    |
| PARK2          | Parkinson disease (autosomal recessive, juvenile) 2, parkin   | The encoded protein is a component of a multiprotein E3 ubiquitin ligase complex that mediates the targeting of substrate proteins for proteasomal degradation.                                                                                                                     |
| PCDHB3         | protocadherin beta 3                                          | The specific functions of these neural cadherin-like cell adhesion proteins are unknown but they most likely play a critical role in the establishment and function of specific cell-cell neural connections.                                                                       |
| PCDHB5         | protocadherin beta 5                                          | The specific functions of these neural cadherin-like cell adhesion proteins are unknown but they most likely play a critical role in the establishment and function of specific cell-cell neural connections.                                                                       |
| PCDHB10        | protocadherin beta 10                                         | The specific functions of these neural cadherin-like cell adhesion proteins are unknown but they most likely play a critical role in the establishment and function of specific cell-cell neural connections.                                                                       |
| PCDHB13        | protocadherin beta 13                                         | The specific functions of these neural cadherin-like cell adhesion proteins are unknown but they most likely play a critical role in the establishment and function of specific cell-cell neural connections.                                                                       |
| PCDHB11        | protocadherin beta 11                                         | The specific functions of these neural cadherin-like cell adhesion proteins are unknown but they most likely play a critical role in the establishment and function of specific cell-cell neural connections.                                                                       |
| PCDHB4         | protocadherin beta 4                                          | The specific functions of these neural cadherin-like cell adhesion proteins are unknown but they most likely play a critical role in the establishment and function of specific cell-cell neural connections.                                                                       |
| PCDHB9         | protocadherin beta 9                                          | The specific functions of these neural cadherin-like cell adhesion proteins are unknown but they most likely play a critical role in the establishment and function of specific cell-cell neural connections.                                                                       |
| PRPH2          | peripherin 2 (retinal degeneration, slow)                     | This encoded protein is a cell surface glycoprotein found in the outer segment of both rod and cone photoreceptor cells. It may function as an adhesion molecule involved in stabilization and compaction of outer segment disks or in the maintenance of the curvature of the rim. |

|        |                                                                                   |                                                                                                                                                                                                                                                                                                                                        |
|--------|-----------------------------------------------------------------------------------|----------------------------------------------------------------------------------------------------------------------------------------------------------------------------------------------------------------------------------------------------------------------------------------------------------------------------------------|
| PTK2   | PTK2 protein tyrosine kinase 2                                                    | Activation of this gene may be an important early step in cell growth and intracellular signal transduction pathways triggered in response to certain neural peptides or to cell interactions with the extracellular matrix.                                                                                                           |
| RIMS1  | regulating synaptic membrane exocytosis 1                                         | The RIM family of active zone proteins likely function as protein scaffolds that help regulate vesicle exocytosis during short-term plasticity.                                                                                                                                                                                        |
| RIT2   | Ras-like without CAAX 2                                                           | RIN belongs to the RAS (HRAS; MIM 190020) superfamily of small GTPases.                                                                                                                                                                                                                                                                |
| SLC1A2 | solute carrier family 1 (glial high affinity glutamate transporter), member 2     | The membrane-bound protein is the principal transporter that clears the excitatory neurotransmitter glutamate from the extracellular space at synapses in the central nervous system. Glutamate clearance is necessary for proper synaptic activation and to prevent neuronal damage from excessive activation of glutamate receptors. |
| SLC1A6 | solute carrier family 1 (high affinity aspartate/glutamate transporter), member 6 |                                                                                                                                                                                                                                                                                                                                        |
| SLC5A7 | solute carrier family 5 (choline transporter), member 7                           | SLC5A7 is a Na(+)- and Cl(-)- dependent high-affinity transporter that mediates the uptake of choline for acetylcholine synthesis in cholinergic neurons.                                                                                                                                                                              |
| SLC6A2 | solute carrier family 6 (neurotransmitter transporter, noradrenalin), member 2    | The SLC6A2 gene encodes a norepinephrine (noradrenaline) transporter, which is responsible for reuptake of norepinephrine into presynaptic nerve terminals and is a regulator of norepinephrine homeostasis.                                                                                                                           |
| SLC8A3 | solute carrier family 8 (sodium/calcium exchanger), member 3                      | The protein is regulated by intracellular calcium ions and is found in both the plasma membrane and intracellular organellar membranes, where exchange of Na <sup>+</sup> for Ca <sup>2+</sup> occurs in an electrogenic manner.                                                                                                       |
| SV2A   | synaptic vesicle glycoprotein 2A                                                  |                                                                                                                                                                                                                                                                                                                                        |
| SV2B   | synaptic vesicle glycoprotein 2B                                                  |                                                                                                                                                                                                                                                                                                                                        |
| SYN2   | synapsin II                                                                       | This neuron-specific phosphoprotein selectively binds to small synaptic vesicles in the presynaptic nerve terminal.                                                                                                                                                                                                                    |
| SYP    | synaptophysin                                                                     | Synaptophysin (p38) is an integral membrane protein of small synaptic vesicles in brain and endocrine cells.                                                                                                                                                                                                                           |
| SYT5   | synaptotagmin V                                                                   |                                                                                                                                                                                                                                                                                                                                        |
| TH     | tyrosine hydroxylase                                                              | The protein encoded by this gene is involved in the conversion of tyrosine to dopamine. It is the rate-limiting enzyme in the synthesis of catecholamines, hence plays a key role in the physiology of adrenergic neurons.                                                                                                             |
| UNC13C | unc-13 homolog C (C. elegans)                                                     |                                                                                                                                                                                                                                                                                                                                        |
| UTS2   | urotensin 2                                                                       | This gene encodes a mature peptide that is an active cyclic heptapeptide absolutely conserved from lamprey to human. The active peptide acts as a vasoconstrictor and is expressed only in brain tissue.                                                                                                                               |

---

Nervous System  
 Development and  
 Function: Neurological  
 Process: Neurological  
 Process of Cells (3.14E-07) *including*  
 Neurological Process of  
 Eukaryotic Cells (5.05E-06), Neurological  
 Process of Normal Cells  
 ( 4.69E-05), Neurological  
 Process of Neurons  
 (6.05E-04), Neurological  
 Process of Cell Lines  
 (7.36E-03), Neurological  
 Process of Neuroglia  
 (1.65E-02)

|         |                                                            |                                                                                                                                                                                                                                                                    |
|---------|------------------------------------------------------------|--------------------------------------------------------------------------------------------------------------------------------------------------------------------------------------------------------------------------------------------------------------------|
| ACE     | angiotensin I converting enzyme (peptidyl-dipeptidase A) 1 | This gene encodes an enzyme involved in catalyzing the conversion of angiotensin I into a physiologically active peptide angiotensin II. This enzyme plays a key role in the renin-angiotensin system.                                                             |
| ARHGAP5 | Rho GTPase activating protein 5                            | Rho GTPase activating protein 5 negatively regulates RHO GTPases, a family which may mediate cytoskeleton changes by stimulating the hydrolysis of bound GTP. Two transcript variants encoding different isoforms have been found for this gene.                   |
| ASCL1   | achaete-scute complex homolog 1 (Drosophila)               | The protein activates transcription by binding to the E box. This protein plays a role in the neuronal commitment and differentiation and in the generation of olfactory and autonomic neurons.                                                                    |
| BCL2    | B-cell CLL/lymphoma 2                                      | This gene encodes an integral outer mitochondrial membrane protein that blocks the apoptotic death of some cells such as lymphocytes.                                                                                                                              |
| BMP7    | bone morphogenetic protein 7                               | Based on its expression early in embryogenesis, the BMP encoded by this gene has a proposed role in early development and possible bone inductive activity.                                                                                                        |
| BSN     | bassoon (presynaptic cytomatrix protein)                   | The protein encoded by this gene is thought to be a scaffolding protein involved in organizing the presynaptic cytoskeleton, primarily in neurons in the brain.                                                                                                    |
| CHRNA7  | cholinergic receptor, nicotinic, alpha 7                   | The protein encoded by this gene forms a homo-oligomeric channel, displays marked permeability to calcium ions and is a major component of brain nicotinic receptors that are blocked by, and highly sensitive to, alpha-bungarotoxin.                             |
| CHRN2   | cholinergic receptor, nicotinic, beta 2 (neuronal)         | The protein encoded by this gene belongs to a superfamily of ligand-gated ion channels which allow the flow of sodium and potassium across the plasma membrane in response to ligands such as acetylcholine and nicotine.                                          |
| CNR1    | cannabinoid receptor 1 (brain)                             | This gene encodes one of two cannabinoid receptors, which have been found to be involved in the cannabinoid-induced CNS effects (including alterations in mood and cognition) experienced by users of marijuana.                                                   |
| CRH     | corticotropin releasing hormone                            | CRH is secreted by the paraventricular nucleus (PVN) of the hypothalamus in response to stress. In the placenta CRH is a marker that determines the length of gestation and the timing of parturition and delivery. CRH may also act as a trigger for parturition. |

|         |                                                         |                                                                                                                                                                                                                                                       |
|---------|---------------------------------------------------------|-------------------------------------------------------------------------------------------------------------------------------------------------------------------------------------------------------------------------------------------------------|
| CRHR1   | corticotropin releasing hormone receptor 1              | The encoded protein is essential for the activation of signal transduction pathways that regulate diverse physiological processes including stress, reproduction, immune response and obesity.                                                        |
| CTF1    | cardiotrophin 1                                         | The protein encoded by this gene is a secreted cytokine that induces cardiac myocyte hypertrophy in vitro. It has been shown to bind and activate the ILST/gp130 receptor.                                                                            |
| CYP19A1 | cytochrome P450, family 19, subfamily A, polypeptide 1  | This protein localizes to the endoplasmic reticulum and catalyzes the last steps of estrogen biosynthesis, three successive hydroxylations of the A ring of androgens.                                                                                |
| DGKE    | diacylglycerol kinase, epsilon 64kDa                    | Diacylglycerol kinases are thought to be involved mainly in the regeneration of phosphatidylinositol (PI) from diacylglycerol in the PI-cycle during cell signal transduction.                                                                        |
| DLG4    | discs, large homolog 4 (Drosophila)                     | This MAGUK protein may interact at postsynaptic sites to form a multimeric scaffold for the clustering of receptors, ion channels, and associated signaling proteins.                                                                                 |
| F2R     | coagulation factor II (thrombin) receptor               | Coagulation factor II receptor is a 7-transmembrane receptor involved in the regulation of thrombotic response.                                                                                                                                       |
| FGF2    | fibroblast growth factor 2 (basic)                      | The CUG-initiated isoforms of this gene are localized in the nucleus and are responsible for the intracrine effect, whereas, the AUG-initiated form is mostly cytosolic and is responsible for the paracrine and autocrine effects of this FGF.       |
| FGFR2   | fibroblast growth factor receptor 2                     | The extracellular portion of this protein interacts with fibroblast growth factors, setting in motion a cascade of downstream signals, ultimately influencing mitogenesis and differentiation.                                                        |
| GABRG1  | gamma-aminobutyric acid (GABA) A receptor, gamma 1      | The protein is an integral membrane protein and plays an important role in inhibiting neurotransmission by binding to the benzodiazepine receptor and opening an integral chloride channel.                                                           |
| GDNF    | glial cell derived neurotrophic factor                  | The recombinant form of this protein was shown to promote the survival and differentiation of dopaminergic neurons in culture, and was able to prevent apoptosis of motor neurons induced by axotomy.                                                 |
| GJD2    | gap junction protein, delta 2, 36kDa                    | This gene is a member of the connexin gene family that is expressed predominantly in mammalian neurons.                                                                                                                                               |
| GRIA2   | glutamate receptor, ionotropic, AMPA 2                  | Glutamate receptors are the predominant excitatory neurotransmitter receptors in the mammalian brain and are activated in a variety of normal neurophysiologic processes. This protein functions as ligand-activated cation channels.                 |
| GRIA3   | glutamate receptor, ionotropic, AMPA 3                  | Glutamate receptors are the predominant excitatory neurotransmitter receptors in the mammalian brain and are activated in a variety of normal neurophysiologic processes.                                                                             |
| GRIK2   | glutamate receptor, ionotropic, kainate 2               | This gene product belongs to the kainate family of glutamate receptors, which are composed of four subunits and function as ligand-activated ion channels.                                                                                            |
| GRIN2A  | glutamate receptor, ionotropic, N-methyl D-aspartate 2A | These receptors have been shown to be involved in long-term potentiation, an activity-dependent increase in the efficiency of synaptic transmission thought to underlie certain kinds of memory and learning.                                         |
| GRIN2B  | glutamate receptor, ionotropic, N-methyl D-aspartate 2B | This NMDA receptor channel has been shown to be involved in long-term potentiation, an activity-dependent increase in the efficiency of synaptic transmission thought to underlie certain kinds of memory and learning.                               |
| HES1    | hairy and enhancer of split 1, (Drosophila)             | It is a transcriptional repressor of genes that require a bHLH protein for their transcription. The protein has a particular type of basic domain that contains a helix interrupting protein that binds to the N-box rather than the canonical E-box. |

|         |                                                                                              |                                                                                                                                                                                                                                                                                                                             |
|---------|----------------------------------------------------------------------------------------------|-----------------------------------------------------------------------------------------------------------------------------------------------------------------------------------------------------------------------------------------------------------------------------------------------------------------------------|
| HEY1    | hairy/enhancer-of-split related with YRPW motif 1                                            | This gene encodes a transcriptional repressor. Two similar and redundant genes in mouse are required for embryonic cardiovascular development, and are also implicated in neurogenesis and somitogenesis.                                                                                                                   |
| HTR4    | 5-hydroxytryptamine (serotonin) receptor 4                                                   | This gene is a member of the family of serotonin receptors, which stimulate cAMP production in response to serotonin (5-hydroxytryptamine). The gene product is a glycosylated transmembrane protein that functions in both the peripheral and central nervous system to modulate the release of various neurotransmitters. |
| HTR1A   | 5-hydroxytryptamine (serotonin) receptor 1A                                                  |                                                                                                                                                                                                                                                                                                                             |
| IGF1    | insulin-like growth factor 1 (somatomedin C)                                                 | The protein encoded by this gene is similar to insulin in function and structure and is a member of a family of proteins involved in mediating growth and development.                                                                                                                                                      |
| ITGB1   | integrin, beta 1 (fibronectin receptor, beta polypeptide, antigen CD29 includes MDF2, MSK12) | Integrin family members are membrane receptors involved in cell adhesion and recognition in a variety of processes including embryogenesis, hemostasis, tissue repair, immune response and metastatic diffusion of tumor cells.                                                                                             |
| JPH4    | junctophilin 4                                                                               | This gene encodes a member of the junctophilin family of transmembrane proteins that are involved in the formation of the junctional membrane complexes between the plasma membrane and the endoplasmic/sarcoplasmic reticulum in excitable cells.                                                                          |
| KCNAB1  | potassium voltage-gated channel, shaker-related subfamily, beta member 1                     | Potassium channels' functions include regulating neurotransmitter release, heart rate, insulin secretion, neuronal excitability, epithelial electrolyte transport, smooth muscle contraction, and cell volume. This gene encodes a member of the potassium channel, voltage-gated, shaker-related subfamily.                |
| KCNJ1   | potassium inwardly-rectifying channel, subfamily J, member 1                                 | This protein is activated by internal ATP and probably plays an important role in potassium homeostasis. It has a greater tendency to allow potassium to flow into a cell rather than out of a cell.                                                                                                                        |
| KCNJ10  | potassium inwardly-rectifying channel, subfamily J, member 10                                | This protein may form a heterodimer with another potassium channel protein and may be responsible for the potassium buffering action of glial cells in the brain.                                                                                                                                                           |
| KCNMB4  | potassium large conductance calcium-activated channel, subfamily M, beta member 4            | This large conductance, voltage and calcium-sensitive potassium channel protein slows activation kinetics, leads to steeper calcium sensitivity, and shifts the voltage range of current activation to more negative potentials.                                                                                            |
| LMNA    | lamin A/C                                                                                    | Lamin proteins are thought to be involved in nuclear stability, chromatin structure and gene expression.                                                                                                                                                                                                                    |
| NCAM1   | neural cell adhesion molecule 1                                                              |                                                                                                                                                                                                                                                                                                                             |
| NCAN    | neurocan                                                                                     | Neurocan is a chondroitin sulfate proteoglycan thought to be involved in the modulation of cell adhesion and migration.                                                                                                                                                                                                     |
| NEUROD2 | neurogenic differentiation 2                                                                 | Expression of this gene can induce transcription from neuron-specific promoters, such as the GAP-43 promoter, which contain a specific DNA sequence known as an E-box. The product of this gene is thought to play a role in the determination and maintenance of neuronal cell fates.                                      |
| NOG     | noggin                                                                                       | This protein may have a principal role in creating morphogenic gradients, and in numerous developmental processes, such as neural tube fusion and joint formation.                                                                                                                                                          |
| NRG1    | neuregulin 1                                                                                 | This protein is a signaling protein that mediates cell-cell interactions and plays critical roles in the growth and development of multiple organ systems.                                                                                                                                                                  |



|         |                                                                          |                                                                                                                                                                                                                                                                                            |
|---------|--------------------------------------------------------------------------|--------------------------------------------------------------------------------------------------------------------------------------------------------------------------------------------------------------------------------------------------------------------------------------------|
| NRP2    | neuropilin 2                                                             | The encoded transmembrane protein binds to SEMA3C protein and SEMA3F protein, and interacts with vascular endothelial growth factor (VEGF). This protein may play a role in cardiovascular development, axon guidance, and tumorigenesis.                                                  |
| NRTN    | neurturin                                                                | Neurturin is a member of the TGF-beta subfamily, TRN. This gene signals through RET and a GPI-linked coreceptor, and promotes survival of neuronal populations.                                                                                                                            |
| NTRK2   | neurotrophic tyrosine kinase, receptor, type 2                           | This kinase is a membrane-bound receptor that, upon neurotrophin binding, phosphorylates itself and members of the MAPK pathway. Signalling through this kinase leads to cell differentiation.                                                                                             |
| POU4F2  | POU class 4 homeobox 2                                                   | POU4F2 is found in human retina exclusively within a subpopulation of ganglion cells where it may play a role in determining or maintaining the identities of a small subset of visual system neurons.                                                                                     |
| PPP2R2C | protein phosphatase 2 (formerly 2A), regulatory subunit B, gamma isoform | Protein phosphatase 2 is one of the four major Ser/Thr phosphatases, and it is implicated in the negative control of cell growth and division                                                                                                                                              |
| PRKCA   | protein kinase C, alpha                                                  | This kinase plays roles in many cellular processes, such as cell adhesion, cell transformation, cell cycle checkpoint, and cell volume control. Knockout studies in mice suggest that this kinase may be a fundamental regulator of cardiac contractility and Ca(2+) handling in myocytes. |
| PRPH2   | peripherin 2 (retinal degeneration, slow)                                | This encoded protein is a cell surface glycoprotein found in the outer segment of both rod and cone photoreceptor cells. It may function as an adhesion molecule involved in stabilization and compaction of outer segment disks or in the maintenance of the curvature of the rim.        |
| PTEN    | phosphatase and tensin homolog                                           | This protein preferentially dephosphorylates phosphoinositide substrates. It negatively regulates intracellular levels of phosphatidylinositol-3,4,5-trisphosphate in cells and functions as a tumor suppressor by negatively regulating AKT/PKB signaling pathway.                        |
| PTK2    | PTK2 protein tyrosine kinase 2                                           | Activation of this gene may be an important early step in cell growth and intracellular signal transduction pathways triggered in response to certain neural peptides or to cell interactions with the extracellular matrix.                                                               |
| PTN     | pleiotrophin                                                             |                                                                                                                                                                                                                                                                                            |
| PTPRD   | protein tyrosine phosphatase, receptor type, D                           | PTPs like this one are known to be signaling molecules that regulate a variety of cellular processes including cell growth, differentiation, mitotic cycle, and oncogenic transformation. This PTP may also promote neurite growth, and regulate neurons axon guidance.                    |
| PYY     | peptide YY                                                               |                                                                                                                                                                                                                                                                                            |
| RBPJ    | recombination signal binding protein for immunoglobulin kappa J region   |                                                                                                                                                                                                                                                                                            |
| RIMS1   | regulating synaptic membrane exocytosis 1                                | The RIM family of active zone proteins likely function as protein scaffolds that help regulate vesicle exocytosis during short-term plasticity.                                                                                                                                            |
| ROBO2   | roundabout, axon guidance receptor, homolog 2 (Drosophila)               | The encoded protein is a receptor for SLIT2, molecules known to function in axon guidance and cell migration.                                                                                                                                                                              |
| SLC17A1 | solute carrier family 17 (sodium phosphate), member 1                    |                                                                                                                                                                                                                                                                                            |

|         |                                                                                         |                                                                                                                                                                                                                                                                                                                                    |
|---------|-----------------------------------------------------------------------------------------|------------------------------------------------------------------------------------------------------------------------------------------------------------------------------------------------------------------------------------------------------------------------------------------------------------------------------------|
| SLC17A7 | solute carrier family 17 (sodium-dependent inorganic phosphate cotransporter), member 7 | This protein is a vesicle-bound, sodium-dependent phosphate transporter specifically expressed in the neuron-rich regions of the brain. It is associated with the membranes of synaptic vesicles and functions in glutamate transport.                                                                                             |
| SRI     | sorcin                                                                                  |                                                                                                                                                                                                                                                                                                                                    |
| SV2A    | synaptic vesicle glycoprotein 2A                                                        |                                                                                                                                                                                                                                                                                                                                    |
| SV2B    | synaptic vesicle glycoprotein 2B                                                        |                                                                                                                                                                                                                                                                                                                                    |
| SYP     | synaptophysin                                                                           | Synaptophysin (p38) is an integral membrane protein of small synaptic vesicles in brain and endocrine cells.                                                                                                                                                                                                                       |
| THBS2   | thrombospondin 2                                                                        | This protein mediates cell-to-cell and cell-to-matrix interactions. It has been shown to function as a potent inhibitor of tumor growth and angiogenesis. Studies of the mouse counterpart suggest that this protein may modulate the cell surface properties of mesenchymal cells and be involved in cell adhesion and migration. |

Nervous System  
Development and  
Function: Neurological  
Process: Neurological  
Process of Tissue (4.22E-04) *including*  
Neurological Process of Nervous Tissue (6.61E-04), Neurological Process of Nerves (2.05E-03)

|          |                                                         |                                                                                                                                                                                                                                               |
|----------|---------------------------------------------------------|-----------------------------------------------------------------------------------------------------------------------------------------------------------------------------------------------------------------------------------------------|
| ASCL1    | achaete-scute complex homolog 1 (Drosophila)            | The protein activates transcription by binding to the E box. This protein plays a role in the neuronal commitment and differentiation and in the generation of olfactory and autonomic neurons.                                               |
| B4GALNT1 | beta-1,4-N-acetyl-galactosaminyl transferase 1          | GalNAc-T is the enzyme involved in the biosynthesis of G(M2) and G(D2) glycosphingolipids. GalNAc-T catalyzes the transfer of GalNAc into G(M3) and G(D3) by a beta-1,4 linkage, resulting in the synthesis of G(M2) and G(D2), respectively. |
| BACE1    | beta-site APP-cleaving enzyme 1                         | The encoded protein, a member of the peptidase A1 protein family, is a type I integral membrane glycoprotein and aspartic protease that is found mainly in the Golgi.                                                                         |
| CD24     | CD24 molecule                                           | This gene encodes a sialoglycoprotein that is expressed on mature granulocytes and in many B cells.                                                                                                                                           |
| CTF1     | cardiotrophin 1                                         | The protein encoded by this gene is a secreted cytokine that induces cardiac myocyte hypertrophy in vitro. It has been shown to bind and activate the ILST/gp130 receptor.                                                                    |
| ENAH     | enabled homolog (Drosophila)                            |                                                                                                                                                                                                                                               |
| GJD2     | gap junction protein, delta 2, 36kDa                    | This gene is a member of the connexin gene family that is expressed predominantly in mammalian neurons.                                                                                                                                       |
| GRIN2B   | glutamate receptor, ionotropic, N-methyl D-aspartate 2B | This NMDA receptor channel has been shown to be involved in long-term potentiation, an activity-dependent increase in the efficiency of synaptic transmission thought to underlie certain kinds of memory and learning.                       |

|         |                                                                                                    |                                                                                                                                                                                                                                                                                          |
|---------|----------------------------------------------------------------------------------------------------|------------------------------------------------------------------------------------------------------------------------------------------------------------------------------------------------------------------------------------------------------------------------------------------|
| HES1    | hairy and enhancer of split 1, (Drosophila)                                                        | It is a transcriptional repressor of genes that require a bHLH protein for their transcription. The protein has a particular type of basic domain that contains a helix interrupting protein that binds to the N-box rather than the canonical E-box.                                    |
| IGF1    | insulin-like growth factor 1 (somatomedin C)                                                       | The protein encoded by this gene is similar to insulin in function and structure and is a member of a family of proteins involved in mediating growth and development.                                                                                                                   |
| MYO5A   | myosin VA (heavy chain 12, myoxin)                                                                 | Myosin V is a class of actin-based motor proteins involved in cytoplasmic vesicle transport and anchorage, spindle-pole alignment and mRNA translocation. The protein encoded by this gene is abundant in melanocytes and nerve cells.                                                   |
| NRG1    | neuregulin 1                                                                                       | This protein is a signaling protein that mediates cell-cell interactions and plays critical roles in the growth and development of multiple organ systems.                                                                                                                               |
| NRP2    | neuropilin 2                                                                                       | The encoded transmembrane protein binds to SEMA3C protein and SEMA3F protein, and interacts with vascular endothelial growth factor (VEGF). This protein may play a role in cardiovascular development, axon guidance, and tumorigenesis.                                                |
| NRTN    | neurturin                                                                                          | Neurturin is a member of the TGF-beta subfamily, TRN. This gene signals through RET and a GPI-linked coreceptor, and promotes survival of neuronal populations.                                                                                                                          |
| NTRK2   | neurotrophic tyrosine kinase, receptor, type 2                                                     | This kinase is a membrane-bound receptor that, upon neurotrophin binding, phosphorylates itself and members of the MAPK pathway. Signalling through this kinase leads to cell differentiation.                                                                                           |
| NTRK3   | neurotrophic tyrosine kinase, receptor, type 3                                                     | This kinase is a membrane-bound receptor that, upon neurotrophin binding, phosphorylates itself and members of the MAPK pathway. Signalling through this kinase leads to cell differentiation and may play a role in the development of proprioceptive neurons that sense body position. |
| POU3F1  | POU class 3 homeobox 1                                                                             |                                                                                                                                                                                                                                                                                          |
| PRKG1   | protein kinase, cGMP-dependent, type I                                                             |                                                                                                                                                                                                                                                                                          |
| SLC17A7 | solute carrier family 17 (sodium-dependent inorganic phosphate cotransporter), member 7            | This protein is a vesicle-bound, sodium-dependent phosphate transporter specifically expressed in the neuron-rich regions of the brain. It is associated with the membranes of synaptic vesicles and functions in glutamate transport.                                                   |
| THRB    | thyroid hormone receptor, beta (erythroblastic leukemia viral (v-erb-a) oncogene homolog 2, avian) | The protein encoded by this gene is a nuclear hormone receptor for triiodothyronine. It is one of the several receptors for thyroid hormone, and has been shown to mediate the biological activities of thyroid hormone.                                                                 |

Nervous System  
Development and  
Function: Neurological  
Process: Neurological  
Process of Nervous  
Tissue (8.10E-04)

|          |                                                |                                                                                                                                                                                                                                               |
|----------|------------------------------------------------|-----------------------------------------------------------------------------------------------------------------------------------------------------------------------------------------------------------------------------------------------|
| ASCL1    | achaete-scute complex homolog 1 (Drosophila)   | The protein activates transcription by binding to the E box. This protein plays a role in the neuronal commitment and differentiation and in the generation of olfactory and autonomic neurons.                                               |
| B4GALNT1 | beta-1,4-N-acetyl-galactosaminyl transferase 1 | GalNAc-T is the enzyme involved in the biosynthesis of G(M2) and G(D2) glycosphingolipids. GalNAc-T catalyzes the transfer of GalNAc into G(M3) and G(D3) by a beta-1,4 linkage, resulting in the synthesis of G(M2) and G(D2), respectively. |
| BACE1    | beta-site APP-cleaving enzyme 1                | The encoded protein, a member of the peptidase A1 protein family, is a type I integral membrane glycoprotein and aspartic protease that is found mainly in the Golgi.                                                                         |

|         |                                                                                                    |                                                                                                                                                                                                                                                                                          |
|---------|----------------------------------------------------------------------------------------------------|------------------------------------------------------------------------------------------------------------------------------------------------------------------------------------------------------------------------------------------------------------------------------------------|
| GJD2    | gap junction protein, delta 2, 36kDa                                                               | This gene is a member of the connexin gene family that is expressed predominantly in mammalian neurons.                                                                                                                                                                                  |
| GRIN2B  | glutamate receptor, ionotropic, N-methyl D-aspartate 2B                                            | This NMDA receptor channel has been shown to be involved in long-term potentiation, an activity-dependent increase in the efficiency of synaptic transmission thought to underlie certain kinds of memory and learning.                                                                  |
| MYO5A   | myosin VA (heavy chain 12, myoxin)                                                                 | Myosin V is a class of actin-based motor proteins involved in cytoplasmic vesicle transport and anchorage, spindle-pole alignment and mRNA translocation. The protein encoded by this gene is abundant in melanocytes and nerve cells.                                                   |
| NRG1    | neuregulin 1                                                                                       | This protein is a signaling protein that mediates cell-cell interactions and plays critical roles in the growth and development of multiple organ systems.                                                                                                                               |
| NRP2    | neuropilin 2                                                                                       | The encoded transmembrane protein binds to SEMA3C protein and SEMA3F protein, and interacts with vascular endothelial growth factor (VEGF). This protein may play a role in cardiovascular development, axon guidance, and tumorigenesis.                                                |
| NRTN    | neurturin                                                                                          | Neurturin is a member of the TGF-beta subfamily, TRN. This gene signals through RET and a GPI-linked coreceptor, and promotes survival of neuronal populations.                                                                                                                          |
| NTRK2   | neurotrophic tyrosine kinase, receptor, type 2                                                     | This kinase is a membrane-bound receptor that, upon neurotrophin binding, phosphorylates itself and members of the MAPK pathway. Signalling through this kinase leads to cell differentiation.                                                                                           |
| NTRK3   | neurotrophic tyrosine kinase, receptor, type 3                                                     | This kinase is a membrane-bound receptor that, upon neurotrophin binding, phosphorylates itself and members of the MAPK pathway. Signalling through this kinase leads to cell differentiation and may play a role in the development of proprioceptive neurons that sense body position. |
| POU3F1  | POU class 3 homeobox 1                                                                             |                                                                                                                                                                                                                                                                                          |
| PRKG1   | protein kinase, cGMP-dependent, type I                                                             |                                                                                                                                                                                                                                                                                          |
| SLC17A7 | solute carrier family 17 (sodium-dependent inorganic phosphate cotransporter), member 7            | This protein is a vesicle-bound, sodium-dependent phosphate transporter specifically expressed in the neuron-rich regions of the brain. It is associated with the membranes of synaptic vesicles and functions in glutamate transport.                                                   |
| THRB    | thyroid hormone receptor, beta (erythroblastic leukemia viral (v-erb-a) oncogene homolog 2, avian) | The protein encoded by this gene is a nuclear hormone receptor for triiodothyronine. It is one of the several receptors for thyroid hormone, and has been shown to mediate the biological activities of thyroid hormone.                                                                 |

Nervous System  
Development and  
Function: Neurological  
Process: Neurological  
Process of Brain (2.16E-03)

|      |                                              |                                                                                                                                                                                                                                                       |
|------|----------------------------------------------|-------------------------------------------------------------------------------------------------------------------------------------------------------------------------------------------------------------------------------------------------------|
| DLG4 | discs, large homolog 4 (Drosophila)          | This MAGUK protein may interact at postsynaptic sites to form a multimeric scaffold for the clustering of receptors, ion channels, and associated signaling proteins.                                                                                 |
| HES1 | hairly and enhancer of split 1, (Drosophila) | It is a transcriptional repressor of genes that require a bHLH protein for their transcription. The protein has a particular type of basic domain that contains a helix interrupting protein that binds to the N-box rather than the canonical E-box. |

|       |                                    |                                                                                                                                                                                                                                                                                                                                    |
|-------|------------------------------------|------------------------------------------------------------------------------------------------------------------------------------------------------------------------------------------------------------------------------------------------------------------------------------------------------------------------------------|
| MYO5A | myosin VA (heavy chain 12, myoxin) | Myosin V is a class of actin-based motor proteins involved in cytoplasmic vesicle transport and anchorage, spindle-pole alignment and mRNA translocation. The protein encoded by this gene is abundant in melanocytes and nerve cells.                                                                                             |
| RBL1  | retinoblastoma-like 1 (p107)       | It is thought that, given the homology to the known tumor suppressor RB1, the protein encoded by this gene may also be a tumor suppressor.                                                                                                                                                                                         |
| THBS2 | thrombospondin 2                   | This protein mediates cell-to-cell and cell-to-matrix interactions. It has been shown to function as a potent inhibitor of tumor growth and angiogenesis. Studies of the mouse counterpart suggest that this protein may modulate the cell surface properties of mesenchymal cells and be involved in cell adhesion and migration. |

Nervous System  
Development and  
Function: Neurological  
Process: Neurological  
Process of Axons(7.31E-  
03)

|        |                                                                     |                                                                                                                                                                                                                                                                                                                                                                     |
|--------|---------------------------------------------------------------------|---------------------------------------------------------------------------------------------------------------------------------------------------------------------------------------------------------------------------------------------------------------------------------------------------------------------------------------------------------------------|
| ADCY1  | adenylate cyclase 1 (brain)                                         | This gene encodes a form of adenylate cyclase expressed in brain.                                                                                                                                                                                                                                                                                                   |
| ARX    | aristaless related homeobox                                         | This gene is a homeobox-containing gene expressed during development, and is thought to be involved in CNS development.                                                                                                                                                                                                                                             |
| BMP7   | bone morphogenetic protein 7                                        | Based on its expression early in embryogenesis, the BMP encoded by this gene has a proposed role in early development and possible bone inductive activity.                                                                                                                                                                                                         |
| CHL1   | cell adhesion molecule with homology to L1CAM (close homolog of L1) | The protein encoded by this gene is a neural recognition molecule that may be involved in signal transduction pathways.                                                                                                                                                                                                                                             |
| CPLX2  | complexin 2                                                         | The protein product of this gene binds to the SNAP receptor complex and disrupts it, allowing transmitter release.                                                                                                                                                                                                                                                  |
| DCC    | deleted in colorectal carcinoma                                     |                                                                                                                                                                                                                                                                                                                                                                     |
| DPYSL3 | dihydropyrimidinase-like 3                                          |                                                                                                                                                                                                                                                                                                                                                                     |
| DPYSL5 | dihydropyrimidinase-like 5                                          | Members of the CRMP family, such as DPYSL5, are believed to play a role in growth cone guidance during neural development.                                                                                                                                                                                                                                          |
| EFNB3  | ephrin-B3                                                           | EFNB3, a member of the ephrin gene family, is important in brain development as well as in its maintenance. It may play a pivotal role in forebrain function. The EPH and EPH-related receptors comprise the largest subfamily of receptor protein-tyrosine kinases and have been implicated in mediating developmental events, particularly in the nervous system. |
| ENAH   | enabled homolog (Drosophila)                                        |                                                                                                                                                                                                                                                                                                                                                                     |
| ERBB4  | v-erb-a erythroblastic leukemia viral oncogene homolog 4 (avian)    | This gene encodes a protein which binds to and is activated by neuregulins and other factors and induces a variety of cellular responses including mitogenesis and differentiation.                                                                                                                                                                                 |
| GDNF   | glial cell derived neurotrophic factor                              | The recombinant form of this protein was shown to promote the survival and differentiation of dopaminergic neurons in culture, and was able to prevent apoptosis of motor neurons induced by axotomy.                                                                                                                                                               |

|        |                                                                                                                  |                                                                                                                                                                                                                                                                                                                                                   |
|--------|------------------------------------------------------------------------------------------------------------------|---------------------------------------------------------------------------------------------------------------------------------------------------------------------------------------------------------------------------------------------------------------------------------------------------------------------------------------------------|
| GRIA2  | glutamate receptor, ionotropic, AMPA 2                                                                           | Glutamate receptors are the predominant excitatory neurotransmitter receptors in the mammalian brain and are activated in a variety of normal neurophysiologic processes. This protein functions as ligand-activated cation channels.                                                                                                             |
| HGF    | hepatocyte growth factor (hepapoietin A; scatter factor)                                                         | Hepatocyte growth factor regulates cell growth, cell motility, and morphogenesis by activating a tyrosine kinase signaling cascade after binding to the proto-oncogenic c-Met receptor. Its ability to stimulate mitogenesis, cell motility, and matrix invasion gives it a central role in angiogenesis, tumorogenesis, and tissue regeneration. |
| HOXA2  | homeobox A2                                                                                                      | This gene is a DNA-binding transcription factor which may regulate gene expression, morphogenesis, and differentiation. It may be involved in the placement of hindbrain segments in the proper location along the anterior-posterior axis during development.                                                                                    |
| KAL1   | Kallmann syndrome 1 sequence                                                                                     | The encoded protein is similar in sequence to proteins known to function in neural cell adhesion and axonal migration, and may have anti-protease activity.                                                                                                                                                                                       |
| KIF5C  | kinesin family member 5C                                                                                         |                                                                                                                                                                                                                                                                                                                                                   |
| LMX1A  | LIM homeobox transcription factor 1, alpha                                                                       | LMX1 is a homeodomain protein that stimulates transcription of insulin.                                                                                                                                                                                                                                                                           |
| NKX2-1 | NK2 homeobox 1                                                                                                   |                                                                                                                                                                                                                                                                                                                                                   |
| NRG1   | neuregulin 1                                                                                                     | This protein is a signaling protein that mediates cell-cell interactions and plays critical roles in the growth and development of multiple organ systems.                                                                                                                                                                                        |
| NRP2   | neuropilin 2                                                                                                     | The encoded transmembrane protein binds to SEMA3C protein and SEMA3F protein, and interacts with vascular endothelial growth factor (VEGF). This protein may play a role in cardiovascular development, axon guidance, and tumorigenesis.                                                                                                         |
| NRXN1  | neurexin 1                                                                                                       | Neurexins function in the vertebrate nervous system as cell adhesion molecules and receptors.                                                                                                                                                                                                                                                     |
| NTRK2  | neurotrophic tyrosine kinase, receptor, type 2                                                                   | This kinase is a membrane-bound receptor that, upon neurotrophin binding, phosphorylates itself and members of the MAPK pathway. Signalling through this kinase leads to cell differentiation.                                                                                                                                                    |
| PLXNA3 | plexin A3                                                                                                        |                                                                                                                                                                                                                                                                                                                                                   |
| POU3F1 | POU class 3 homeobox 1                                                                                           |                                                                                                                                                                                                                                                                                                                                                   |
| POU4F1 | POU class 4 homeobox 1                                                                                           | POU4F1 is a class IV POU domain-containing transcription factor highly expressed in the developing sensory nervous system and in cells of the B- and T-lymphocytic lineages.                                                                                                                                                                      |
| POU4F2 | POU class 4 homeobox 2                                                                                           | POU4F2 is found in human retina exclusively within a subpopulation of ganglion cells where it may play a role in determining or maintaining the identities of a small subset of visual system neurons.                                                                                                                                            |
| PRKG1  | protein kinase, cGMP-dependent, type I                                                                           |                                                                                                                                                                                                                                                                                                                                                   |
| ROBO2  | roundabout, axon guidance receptor, homolog 2 (Drosophila)                                                       | The encoded protein is a receptor for SLIT2, molecules known to function in axon guidance and cell migration.                                                                                                                                                                                                                                     |
| SEMA4F | sema domain, immunoglobulin domain (Ig), transmembrane domain (TM) and short cytoplasmic domain, (semaphorin) 4F |                                                                                                                                                                                                                                                                                                                                                   |

|        |                                                                                 |                                                                                                                                                                                              |
|--------|---------------------------------------------------------------------------------|----------------------------------------------------------------------------------------------------------------------------------------------------------------------------------------------|
| SEMA6C | sema domain, transmembrane domain (TM), and cytoplasmic domain, (semaphorin) 6C | Semaphorins represent important molecular signals controlling multiple aspects of the cellular response that follows CNS injury, and thus may play an important role in neural regeneration. |
| UNC5B  | unc-5 homolog B (C. elegans)                                                    | UNC5B belongs to a family of netrin-1 (MIM 601614) receptors thought to mediate the chemorepulsive effect of netrin-1 on specific axons.                                                     |
| UNC5C  | unc-5 homolog C (C. elegans)                                                    | The UNC-5 family of receptors mediate the repellent response to netrin.                                                                                                                      |

Nervous System  
Development and  
Function: Neurological  
Process: Neurological  
Process of Lines (7.36E-03)

|         |                                                                          |                                                                                                                                                                                                                                                                                        |
|---------|--------------------------------------------------------------------------|----------------------------------------------------------------------------------------------------------------------------------------------------------------------------------------------------------------------------------------------------------------------------------------|
| ARHGAP5 | Rho GTPase activating protein 5                                          | This protein negatively regulates RHO GTPases, a family which may mediate cytoskeleton changes by stimulating the hydrolysis of bound GTP.                                                                                                                                             |
| BCL2    | B-cell CLL/lymphoma 2                                                    | This gene encodes an integral outer mitochondrial membrane protein that blocks the apoptotic death of some cells such as lymphocytes.                                                                                                                                                  |
| CRH     | corticotropin releasing hormone                                          | CRH is secreted by the paraventricular nucleus (PVN) of the hypothalamus in response to stress. In the placenta CRH is a marker that determines the length of gestation and the timing of parturition and delivery. CRH may also act as a trigger for parturition.                     |
| CRHR1   | corticotropin releasing hormone receptor 1                               | The encoded protein is essential for the activation of signal transduction pathways that regulate diverse physiological processes including stress, reproduction, immune response and obesity.                                                                                         |
| FGF2    | fibroblast growth factor 2 (basic)                                       | The CUG-initiated isoforms of this gene are localized in the nucleus and are responsible for the intracrine effect, whereas, the AUG-initiated form is mostly cytosolic and is responsible for the paracrine and autocrine effects of this FGF.                                        |
| FGFR2   | fibroblast growth factor receptor 2                                      | The extracellular portion of this protein interacts with fibroblast growth factors, setting in motion a cascade of downstream signals, ultimately influencing mitogenesis and differentiation.                                                                                         |
| GDNF    | glial cell derived neurotrophic factor                                   | The recombinant form of this protein was shown to promote the survival and differentiation of dopaminergic neurons in culture, and was able to prevent apoptosis of motor neurons induced by axotomy.                                                                                  |
| LMNA    | lamin A/C                                                                | Lamin proteins are thought to be involved in nuclear stability, chromatin structure and gene expression.                                                                                                                                                                               |
| NEUROD2 | neurogenic differentiation 2                                             | Expression of this gene can induce transcription from neuron-specific promoters, such as the GAP-43 promoter, which contain a specific DNA sequence known as an E-box. The product of this gene is thought to play a role in the determination and maintenance of neuronal cell fates. |
| PPP2R2C | protein phosphatase 2 (formerly 2A), regulatory subunit B, gamma isoform | Protein phosphatase 2 is one of the four major Ser/Thr phosphatases, and it is implicated in the negative control of cell growth and division                                                                                                                                          |

Nervous System  
Development and  
Function: Neurological  
Process: Neurological  
Process of Neuroglia  
(1.65E-02)

|      |                 |                                                                                                                                                                            |
|------|-----------------|----------------------------------------------------------------------------------------------------------------------------------------------------------------------------|
| CTF1 | cardiotrophin 1 | The protein encoded by this gene is a secreted cytokine that induces cardiac myocyte hypertrophy in vitro. It has been shown to bind and activate the ILST/gp130 receptor. |
|------|-----------------|----------------------------------------------------------------------------------------------------------------------------------------------------------------------------|

|       |                                                                                              |                                                                                                                                                                                                                                                 |
|-------|----------------------------------------------------------------------------------------------|-------------------------------------------------------------------------------------------------------------------------------------------------------------------------------------------------------------------------------------------------|
| FGF2  | fibroblast growth factor 2 (basic)                                                           | The CUG-initiated isoforms of this gene are localized in the nucleus and are responsible for the intracrine effect, whereas, the AUG-initiated form is mostly cytosolic and is responsible for the paracrine and autocrine effects of this FGF. |
| ITGB1 | integrin, beta 1 (fibronectin receptor, beta polypeptide, antigen CD29 includes MDF2, MSK12) | Integrin family members are membrane receptors involved in cell adhesion and recognition in a variety of processes including embryogenesis, hemostasis, tissue repair, immune response and metastatic diffusion of tumor cells.                 |
| NRG1  | neuregulin 1                                                                                 | This protein is a signaling protein that mediates cell-cell interactions and plays critical roles in the growth and development of multiple organ systems.                                                                                      |
| RBPJ  | recombination signal binding protein for immunoglobulin kappa J region                       |                                                                                                                                                                                                                                                 |

#### Nervous System

Development and

Function: Differentiation:

Differentiation of

Neurons (4.87E-07)

|         |                                                          |                                                                                                                                                                                                                                                                                                                                                                                                                                          |
|---------|----------------------------------------------------------|------------------------------------------------------------------------------------------------------------------------------------------------------------------------------------------------------------------------------------------------------------------------------------------------------------------------------------------------------------------------------------------------------------------------------------------|
| AGTR2   | angiotensin II receptor, type 2                          | AGTR2 plays a role in the central nervous system and cardiovascular functions that are mediated by the renin-angiotensin system. This receptor mediates programmed cell death (apoptosis).                                                                                                                                                                                                                                               |
| AKT2    | v-akt murine thymoma viral oncogene homolog 2            | This gene is a putative oncogene encoding a subfamily of serine/threonine kinases containing SH2-like (Src homology 2-like) domains. The encoded protein is a general protein kinase capable of phosphorylating several known proteins.                                                                                                                                                                                                  |
| ARX     | aristaless related homeobox                              | This gene is a homeobox-containing gene expressed during development, and is thought to be involved in CNS development.                                                                                                                                                                                                                                                                                                                  |
| ASCL1   | achaete-scute complex homolog 1 (Drosophila)             | The protein activates transcription by binding to the E box. This protein plays a role in the neuronal commitment and differentiation and in the generation of olfactory and autonomic neurons.                                                                                                                                                                                                                                          |
| ATM     | ataxia telangiectasia mutated                            | This protein functions as a regulator of a wide variety of downstream proteins, including tumor suppressor proteins p53 and BRCA1, checkpoint kinase CHK2, checkpoint proteins RAD17 and RAD9, and DNA repair protein NBS1. This protein and the closely related kinase ATR are thought to be master controllers of cell cycle checkpoint signaling pathways that are required for cell response to DNA damage and for genome stability. |
| ATP2B2  | ATPase, Ca <sup>++</sup> transporting, plasma membrane 2 | These enzymes remove bivalent calcium ions from eukaryotic cells against very large concentration gradients and play a critical role in intracellular calcium homeostasis.                                                                                                                                                                                                                                                               |
| BCL2    | B-cell CLL/lymphoma 2                                    | This gene encodes an integral outer mitochondrial membrane protein that blocks the apoptotic death of some cells such as lymphocytes.                                                                                                                                                                                                                                                                                                    |
| BHLHE22 | basic helix-loop-helix family, member e22                |                                                                                                                                                                                                                                                                                                                                                                                                                                          |
| BRSK1   | BR serine/threonine kinase 1                             |                                                                                                                                                                                                                                                                                                                                                                                                                                          |
| BRSK2   | BR serine/threonine kinase 2                             |                                                                                                                                                                                                                                                                                                                                                                                                                                          |
| BTG4    | B-cell translocation gene 4                              | This encoded protein can induce G1 arrest in the cell cycle.                                                                                                                                                                                                                                                                                                                                                                             |
| CD24    | CD24 molecule                                            | This gene encodes a sialoglycoprotein that is expressed on mature granulocytes and in many B cells.                                                                                                                                                                                                                                                                                                                                      |



|          |                                              |                                                                                                                                                                                                                                                                                                          |
|----------|----------------------------------------------|----------------------------------------------------------------------------------------------------------------------------------------------------------------------------------------------------------------------------------------------------------------------------------------------------------|
| CDK5RAP2 | CDK5 regulatory subunit associated protein 2 | This protein may be involved in neuronal differentiation.                                                                                                                                                                                                                                                |
| CDON     | Cdon homolog (mouse)                         | CDON and BOC (MIM 608708) are cell surface receptors of the immunoglobulin (Ig)/fibronectin type III (FNIII; see MIM 135600) repeat family involved in myogenic differentiation. CDON and BOC are coexpressed during development.                                                                        |
| CNR1     | cannabinoid receptor 1 (brain)               | This gene encodes one of two cannabinoid receptors, which have been found to be involved in the cannabinoid-induced CNS effects (including alterations in mood and cognition) experienced by users of marijuana.                                                                                         |
| CSF3     | colony stimulating factor 3 (granulocyte)    | The protein encoded by this gene is a cytokine that controls the production, differentiation, and function of granulocytes.                                                                                                                                                                              |
| CTF1     | cardiotrophin 1                              | The protein encoded by this gene is a secreted cytokine that induces cardiac myocyte hypertrophy in vitro. It has been shown to bind and activate the ILST/gp130 receptor.                                                                                                                               |
| DLX1     | distal-less homeobox 1                       | This protein may function as a transcriptional regulator of signals from multiple TGF- $\beta$ superfamily members. It may play a role in the control of craniofacial patterning and the differentiation and survival of inhibitory neurons in the forebrain.                                            |
| EFNA3    | ephrin-A3                                    | The ephrins and EPH-related receptors comprise the largest subfamily of receptor protein-tyrosine kinases and have been implicated in mediating developmental events, especially in the nervous system and in erythropoiesis.                                                                            |
| EMX2     | empty spiracles homeobox 2                   | The homeodomain transcription factor EMX2 is critical for central nervous system and urogenital development.                                                                                                                                                                                             |
| EYA1     | eyes absent homolog 1 (Drosophila)           | The encoded protein may play a role in the developing kidney, branchial arches, eye, and ear.                                                                                                                                                                                                            |
| FGF1     | fibroblast growth factor 1 (acidic)          | This protein functions as a modifier of endothelial cell migration and proliferation, as well as an angiogenic factor. It acts as a mitogen for a variety of mesoderm- and neuroectoderm-derived cells in vitro, thus is thought to be involved in organogenesis.                                        |
| FGF2     | fibroblast growth factor 2 (basic)           | The CUG-initiated isoforms of this gene are localized in the nucleus and are responsible for the intracrine effect, whereas, the AUG-initiated form is mostly cytosolic and is responsible for the paracrine and autocrine effects of this FGF.                                                          |
| FGF4     | fibroblast growth factor 4                   | This gene was identified by its oncogenic transforming activity. Studies on the mouse homolog suggested a function in bone morphogenesis and limb development through the sonic hedgehog (SHH) signaling pathway.                                                                                        |
| FGF5     | fibroblast growth factor 5                   | This gene was identified as an oncogene, which confers transforming potential when transfected into mammalian cells.                                                                                                                                                                                     |
| FGFR2    | fibroblast growth factor receptor 2          | The extracellular portion of this protein interacts with fibroblast growth factors, setting in motion a cascade of downstream signals, ultimately influencing mitogenesis and differentiation.                                                                                                           |
| FOXA1    | forkhead box A1                              | These hepatocyte nuclear factors are transcriptional activators for liver-specific transcripts such as albumin and transthyretin, and they also interact with chromatin. Similar family members in mice have roles in the regulation of metabolism and in the differentiation of the pancreas and liver. |
| FOXA2    | forkhead box A2                              | These hepatocyte nuclear factors are transcriptional activators for liver-specific genes such as albumin and transthyretin, and they also interact with chromatin. Similar family members have roles in the regulation of metabolism and in the differentiation of the pancreas and liver.               |

|        |                                                                                              |                                                                                                                                                                                                                                                                                                                                                   |
|--------|----------------------------------------------------------------------------------------------|---------------------------------------------------------------------------------------------------------------------------------------------------------------------------------------------------------------------------------------------------------------------------------------------------------------------------------------------------|
| GDF5   | growth differentiation factor 5                                                              | The members of this family are regulators of cell growth and differentiation in both embryonic and adult tissues.                                                                                                                                                                                                                                 |
| GDNF   | glial cell derived neurotrophic factor                                                       | The recombinant form of this protein was shown to promote the survival and differentiation of dopaminergic neurons in culture, and was able to prevent apoptosis of motor neurons induced by axotomy.                                                                                                                                             |
| HES1   | hairy and enhancer of split 1, (Drosophila)                                                  | It is a transcriptional repressor of genes that require a bHLH protein for their transcription. The protein has a particular type of basic domain that contains a helix interrupting protein that binds to the N-box rather than the canonical E-box.                                                                                             |
| HGF    | hepatocyte growth factor (hepapoietin A; scatter factor)                                     | Hepatocyte growth factor regulates cell growth, cell motility, and morphogenesis by activating a tyrosine kinase signaling cascade after binding to the proto-oncogenic c-Met receptor. Its ability to stimulate mitogenesis, cell motility, and matrix invasion gives it a central role in angiogenesis, tumorogenesis, and tissue regeneration. |
| HOXA2  | homeobox A2                                                                                  | This gene is a DNA-binding transcription factor which may regulate gene expression, morphogenesis, and differentiation. It may be involved in the placement of hindbrain segments in the proper location along the anterior-posterior axis during development.                                                                                    |
| HOXB2  | homeobox B2                                                                                  | The encoded protein functions as a sequence-specific transcription factor that is involved in development.                                                                                                                                                                                                                                        |
| HOXD3  | homeobox D3                                                                                  | The protein encoded by this gene may play a role in the regulation of cell adhesion processes.                                                                                                                                                                                                                                                    |
| ID4    | inhibitor of DNA binding 4, dominant negative helix-loop-helix protein                       | Consequently, Id proteins inhibit binding to DNA and transcriptional transactivation by heterodimerization with bHLH proteins.                                                                                                                                                                                                                    |
| IGF1   | insulin-like growth factor 1 (somatomedin C)                                                 | The protein encoded by this gene is similar to insulin in function and structure and is a member of a family of proteins involved in mediating growth and development.                                                                                                                                                                            |
| IL3    | interleukin 3 (colony-stimulating factor, multiple)                                          | This protein is a potent growth promoting cytokine, especially with hematopoietic cell types. It is involved in cell growth, differentiation and apoptosis, and also possesses neurotrophic activity.                                                                                                                                             |
| ITGB1  | integrin, beta 1 (fibronectin receptor, beta polypeptide, antigen CD29 includes MDF2, MSK12) | Integrin family members are membrane receptors involved in cell adhesion and recognition in a variety of processes including embryogenesis, hemostasis, tissue repair, immune response and metastatic diffusion of tumor cells.                                                                                                                   |
| KCNMA1 | potassium large conductance calcium-activated channel, subfamily M, alpha member 1           | MaxiK channels are large conductance, voltage and calcium-sensitive potassium channels which are fundamental to the control of smooth muscle tone and neuronal excitability.                                                                                                                                                                      |
| KNDC1  | kinase non-catalytic C-lobe domain (KIND) containing 1                                       |                                                                                                                                                                                                                                                                                                                                                   |
| LMX1A  | LIM homeobox transcription factor 1, alpha                                                   | LMX1 is a homeodomain protein that stimulates transcription of insulin.                                                                                                                                                                                                                                                                           |
| MAPK8  | mitogen-activated protein kinase 8                                                           | This kinase mediates immediate-early gene expression in response to cell stimuli and is related to cytochrome c-mediated cell death pathway. The mouse counterpart plays a key role in T cell proliferation, apoptosis and differentiation.                                                                                                       |

|        |                                                                        |                                                                                                                                                                                                                                                                                          |
|--------|------------------------------------------------------------------------|------------------------------------------------------------------------------------------------------------------------------------------------------------------------------------------------------------------------------------------------------------------------------------------|
| MAPT   | microtubule-associated protein tau                                     | MAPT transcripts are differentially expressed in the nervous system, depending on stage of neuronal maturation and neuron type.                                                                                                                                                          |
| MCOLN3 | mucolipin 3                                                            | Mucolipins constitute a family of cation channel proteins with homologs in mouse, Drosophila, and C. elegans. Mutations in the human MCOLN1 gene (MIM 605248) cause mucopolipidosis IV (MIM 262650).                                                                                     |
| MEIS1  | Meis homeobox 1                                                        | Homeobox genes, of which the most well-characterized category is represented by the HOX genes, play a crucial role in normal development. In addition, several homeoproteins are involved in neoplasia.                                                                                  |
| METRN  | meteorin, glial cell differentiation regulator                         | Meteorin regulates glial cell differentiation and promotes the formation of axonal networks during neurogenesis.                                                                                                                                                                         |
| MNX1   | motor neuron and pancreas homeobox 1                                   |                                                                                                                                                                                                                                                                                          |
| MYO7A  | myosin VIIA                                                            | Myosins are mechanochemical proteins characterized by the presence of a motor domain, an actin-binding domain, a neck domain that interacts with other proteins, and a tail domain that serves as an anchor. This gene encodes an unconventional myosin with a very short tail.          |
| NCAM1  | neural cell adhesion molecule 1                                        |                                                                                                                                                                                                                                                                                          |
| NLGN1  | neuroligin 1                                                           | Members of this family may act as splice site-specific ligands for beta-neurexins and may be involved in the formation and remodeling of central nervous system synapses.                                                                                                                |
| NOG    | noggin                                                                 | This protein may have a principal role in creating morphogenic gradients, and in numerous developmental processes, such as neural tube fusion and joint formation.                                                                                                                       |
| NR2E1  | nuclear receptor subfamily 2, group E, member 1                        |                                                                                                                                                                                                                                                                                          |
| NRG1   | neuregulin 1                                                           | This protein is a signaling protein that mediates cell-cell interactions and plays critical roles in the growth and development of multiple organ systems.                                                                                                                               |
| NTRK2  | neurotrophic tyrosine kinase, receptor, type 2                         | This kinase is a membrane-bound receptor that, upon neurotrophin binding, phosphorylates itself and members of the MAPK pathway. Signalling through this kinase leads to cell differentiation.                                                                                           |
| NTRK3  | neurotrophic tyrosine kinase, receptor, type 3                         | This kinase is a membrane-bound receptor that, upon neurotrophin binding, phosphorylates itself and members of the MAPK pathway. Signalling through this kinase leads to cell differentiation and may play a role in the development of proprioceptive neurons that sense body position. |
| PCDH15 | protocadherin 15                                                       | This gene encodes an integral membrane protein that mediates calcium-dependent cell-cell adhesion. It plays an essential role in maintenance of normal retinal and cochlear function.                                                                                                    |
| POU3F2 | POU class 3 homeobox 2                                                 | Class III POU genes are expressed predominantly in the central nervous system (CNS). It is likely that CNS-specific transcription factors such as these play an important role in mammalian neurogenesis.                                                                                |
| POU4F1 | POU class 4 homeobox 1                                                 | POU4F1 is a class IV POU domain-containing transcription factor highly expressed in the developing sensory nervous system and in cells of the B- and T-lymphocytic lineages.                                                                                                             |
| POU4F2 | POU class 4 homeobox 2                                                 | POU4F2 is found in human retina exclusively within a subpopulation of ganglion cells where it may play a role in determining or maintaining the identities of a small subset of visual system neurons.                                                                                   |
| PTN    | pleiotrophin                                                           |                                                                                                                                                                                                                                                                                          |
| RBPJ   | recombination signal binding protein for immunoglobulin kappa J region |                                                                                                                                                                                                                                                                                          |
| RGS6   | regulator of G-protein signaling 6                                     | Members of the RGS (regulator of G protein signaling) family, such as RGS6, modulate G protein function by activating the intrinsic GTPase activity of the alpha (guanine nucleotide-binding) subunits.                                                                                  |

|               |                                                                               |                                                                                                                                                                                                                                                                                                                                        |
|---------------|-------------------------------------------------------------------------------|----------------------------------------------------------------------------------------------------------------------------------------------------------------------------------------------------------------------------------------------------------------------------------------------------------------------------------------|
| RIT2          | Ras-like without CAAX 2                                                       | RIN belongs to the RAS (HRAS; MIM 190020) superfamily of small GTPases.                                                                                                                                                                                                                                                                |
| SLC1A2        | solute carrier family 1 (glial high affinity glutamate transporter), member 2 | The membrane-bound protein is the principal transporter that clears the excitatory neurotransmitter glutamate from the extracellular space at synapses in the central nervous system. Glutamate clearance is necessary for proper synaptic activation and to prevent neuronal damage from excessive activation of glutamate receptors. |
| SOX2          | SRY (sex determining region Y)-box 2                                          | This protein is required for stem-cell maintenance in the central nervous system, and also regulates gene expression in the stomach.                                                                                                                                                                                                   |
| VGf           | VGf nerve growth factor inducible                                             | This gene is specifically expressed in a subpopulation of neuroendocrine cells, and is upregulated by nerve growth factor.                                                                                                                                                                                                             |
| VSX1<br>ZFHX3 | visual system homeobox 1<br>zinc finger homeobox 3                            | The encoded protein may regulate expression of the cone opsin genes early in development.                                                                                                                                                                                                                                              |
| ZIC3          | Zic family member 3 (odd-paired homolog, Drosophila)                          | This nuclear protein probably functions as a transcription factor in early stages of left-right body axis formation.                                                                                                                                                                                                                   |

Nervous System  
Development and  
Function:  
Synaptogenesis:  
Synaptogenesis (4.99E-  
07)

|         |                                                                                              |                                                                                                                                                                                                                                                                                                                    |
|---------|----------------------------------------------------------------------------------------------|--------------------------------------------------------------------------------------------------------------------------------------------------------------------------------------------------------------------------------------------------------------------------------------------------------------------|
| CADM1   | cell adhesion molecule 1                                                                     |                                                                                                                                                                                                                                                                                                                    |
| CHRNb2  | cholinergic receptor, nicotinic, beta 2 (neuronal)                                           | The protein encoded by this gene belongs to a superfamily of ligand-gated ion channels which allow the flow of sodium and potassium across the plasma membrane in response to ligands such as acetylcholine and nicotine.                                                                                          |
| CYP19A1 | cytochrome P450, family 19, subfamily A, polypeptide 1                                       | This protein localizes to the endoplasmic reticulum and catalyzes the last steps of estrogen biosynthesis, three successive hydroxylations of the A ring of androgens.                                                                                                                                             |
| DLG4    | discs, large homolog 4 (Drosophila)                                                          | This MAGUK protein may interact at postsynaptic sites to form a multimeric scaffold for the clustering of receptors, ion channels, and associated signaling proteins.                                                                                                                                              |
| GHSR    | growth hormone secretagogue receptor                                                         | The encoded protein may play a role in energy homeostasis and regulation of body weight.                                                                                                                                                                                                                           |
| GJA10   | gap junction protein, alpha 10, 62kDa                                                        | Connexins, such as GJA10, are involved in the formation of gap junctions, intercellular conduits that directly connect the cytoplasm of contacting cells.                                                                                                                                                          |
| ITGB1   | integrin, beta 1 (fibronectin receptor, beta polypeptide, antigen CD29 includes MDF2, MSK12) | Integrin family members are membrane receptors involved in cell adhesion and recognition in a variety of processes including embryogenesis, hemostasis, tissue repair, immune response and metastatic diffusion of tumor cells.                                                                                    |
| MUSK    | muscle, skeletal, receptor tyrosine kinase                                                   | This kinase activity is regulated by the binding of a cognate ligand to the extracellular portion of the receptor. DeChiara et al. (1996) [PubMed 8653786] noted that the RTKs, known to be expressed in cell type-specific fashions, play a role critical for the growth and differentiation of those cell types. |
| NLGN1   | neuroligin 1                                                                                 | Members of this family may act as splice site-specific ligands for beta-neurexins and may be involved in the formation and remodeling of central nervous system synapses.                                                                                                                                          |
| NRG1    | neuregulin 1                                                                                 | This protein is a signaling protein that mediates cell-cell interactions and plays critical roles in the growth and development of multiple organ systems.                                                                                                                                                         |
| NRXN1   | neurexin 1                                                                                   | Neurexins function in the vertebrate nervous system as cell adhesion molecules and receptors.                                                                                                                                                                                                                      |

|         |                         |                                                                                                                                                                                                                                                                                                                                    |
|---------|-------------------------|------------------------------------------------------------------------------------------------------------------------------------------------------------------------------------------------------------------------------------------------------------------------------------------------------------------------------------|
| PCDHB3  | protocadherin beta 3    | The specific functions of these neural cadherin-like cell adhesion proteins are unknown but they most likely play a critical role in the establishment and function of specific cell-cell neural connections.                                                                                                                      |
| PCDHB5  | protocadherin beta 5    | The specific functions of these neural cadherin-like cell adhesion proteins are unknown but they most likely play a critical role in the establishment and function of specific cell-cell neural connections.                                                                                                                      |
| PCDHB10 | protocadherin beta 10   | The specific functions of these neural cadherin-like cell adhesion proteins are unknown but they most likely play a critical role in the establishment and function of specific cell-cell neural connections.                                                                                                                      |
| PCDHB13 | protocadherin beta 13   | The specific functions of these neural cadherin-like cell adhesion proteins are unknown but they most likely play a critical role in the establishment and function of specific cell-cell neural connections.                                                                                                                      |
| PCDHB11 | protocadherin beta 11   | The specific functions of these neural cadherin-like cell adhesion proteins are unknown but they most likely play a critical role in the establishment and function of specific cell-cell neural connections.                                                                                                                      |
| PCDHB4  | protocadherin beta 4    | The specific functions of these neural cadherin-like cell adhesion proteins are unknown but they most likely play a critical role in the establishment and function of specific cell-cell neural connections.                                                                                                                      |
| PCDHB9  | protocadherin beta 9    | The specific functions of these neural cadherin-like cell adhesion proteins are unknown but they most likely play a critical role in the establishment and function of specific cell-cell neural connections.                                                                                                                      |
| POU4F1  | POU class 4 homeobox 1  | POU4F1 is a class IV POU domain-containing transcription factor highly expressed in the developing sensory nervous system and in cells of the B- and T-lymphocytic lineages.                                                                                                                                                       |
| PRKCA   | protein kinase C, alpha | This kinase plays roles in many cellular processes, such as cell adhesion, cell transformation, cell cycle checkpoint, and cell volume control. Knockout studies in mice suggest that this kinase may be a fundamental regulator of cardiac contractility and Ca(2+) handling in myocytes.                                         |
| THBS2   | thrombospondin 2        | This protein mediates cell-to-cell and cell-to-matrix interactions. It has been shown to function as a potent inhibitor of tumor growth and angiogenesis. Studies of the mouse counterpart suggest that this protein may modulate the cell surface properties of mesenchymal cells and be involved in cell adhesion and migration. |

Nervous System  
Development and  
Function: Development:  
Development of Nervous  
System (1.09E-04)  
*including* Development  
of Central Nervous  
System (4.62E-04)

|         |                                                                         |                                                                                                                                                                                              |
|---------|-------------------------------------------------------------------------|----------------------------------------------------------------------------------------------------------------------------------------------------------------------------------------------|
| ADAM22  | ADAM metallopeptidase domain 22                                         | This gene is highly expressed in the brain and may function as an integrin ligand in the brain.                                                                                              |
| ADAM23  | ADAM metallopeptidase domain 23                                         | This gene is highly expressed in the brain and may function as an integrin ligand in the brain.                                                                                              |
| AFF2    | AF4/FMR2 family, member 2                                               |                                                                                                                                                                                              |
| AKT3    | v-akt murine thymoma viral oncogene homolog 3 (protein kinase B, gamma) | The protein is involved in a wide variety of biological processes including cell proliferation, differentiation, apoptosis, tumorigenesis, as well as glycogen synthesis and glucose uptake. |
| ALDH5A1 | aldehyde dehydrogenase 5 family, member A1                              | This gene encodes a mitochondrial NAD(+)-dependent succinic semialdehyde dehydrogenase.                                                                                                      |

|          |                                                                               |                                                                                                                                                                                                                                                                                                                                                                                                                                          |
|----------|-------------------------------------------------------------------------------|------------------------------------------------------------------------------------------------------------------------------------------------------------------------------------------------------------------------------------------------------------------------------------------------------------------------------------------------------------------------------------------------------------------------------------------|
| ARSB     | arylsulfatase B                                                               | The arylsulfatase B homodimer hydrolyzes sulfate groups of N-Acetyl-D-galactosamine, chondroitin sulfate, and dermatan sulfate. The protein is targeted to the lysosome.                                                                                                                                                                                                                                                                 |
| ARX      | aristaless related homeobox                                                   | This gene is a homeobox-containing gene expressed during development, and is thought to be involved in CNS development.                                                                                                                                                                                                                                                                                                                  |
| ATM      | ataxia telangiectasia mutated                                                 | This protein functions as a regulator of a wide variety of downstream proteins, including tumor suppressor proteins p53 and BRCA1, checkpoint kinase CHK2, checkpoint proteins RAD17 and RAD9, and DNA repair protein NBS1. This protein and the closely related kinase ATR are thought to be master controllers of cell cycle checkpoint signaling pathways that are required for cell response to DNA damage and for genome stability. |
| BMP5     | bone morphogenetic protein 5                                                  | This protein may act as signaling molecule within the trabecular meshwork and optic nerve head, and may play a potential role in glaucoma pathogenesis. This gene is differentially regulated during the formation of various tumors.                                                                                                                                                                                                    |
| BMP7     | bone morphogenetic protein 7                                                  | Based on its expression early in embryogenesis, the BMP encoded by this gene has a proposed role in early development and possible bone inductive activity.                                                                                                                                                                                                                                                                              |
| CCKAR    | cholecystokinin A receptor                                                    | This receptor is a major physiologic mediator of pancreatic enzyme secretion and smooth muscle contraction of the gallbladder and stomach. In the central and peripheral nervous system this receptor regulates satiety and the release of beta-endorphin and dopamine.                                                                                                                                                                  |
| CDK5RAP2 | CDK5 regulatory subunit associated protein 2                                  | This protein may be involved in neuronal differentiation.                                                                                                                                                                                                                                                                                                                                                                                |
| CELSR1   | cadherin, EGF LAG seven-pass G-type receptor 1 (flamingo homolog, Drosophila) | This particular member is a developmentally regulated, neural-specific gene which plays an unspecified role in early embryogenesis.                                                                                                                                                                                                                                                                                                      |
| CHD7     | chromodomain helicase DNA binding protein 7                                   | This gene encodes a protein that contains several helicase family domains.                                                                                                                                                                                                                                                                                                                                                               |
| CSF3     | colony stimulating factor 3 (granulocyte)                                     | The protein encoded by this gene is a cytokine that controls the production, differentiation, and function of granulocytes.                                                                                                                                                                                                                                                                                                              |
| CTNNA2   | catenin (cadherin-associated protein), alpha 2                                |                                                                                                                                                                                                                                                                                                                                                                                                                                          |
| DCLK1    | doublecortin-like kinase 1                                                    | DCAMKL1 is a microtubule-associated protein that phosphorylates itself and myelin basic protein (MBP; MIM 159430).                                                                                                                                                                                                                                                                                                                       |
| DLC1     | deleted in liver cancer 1                                                     | It is suggested that this gene is a candidate tumor suppressor gene for human liver cancer, as well as for prostate, lung, colorectal, and breast cancers.                                                                                                                                                                                                                                                                               |
| E2F1     | E2F transcription factor 1                                                    | The protein encoded by this gene is a member of the E2F family of transcription factors which plays a crucial role in the control of cell cycle and action of tumor suppressor proteins and is also a target of the transforming proteins of small DNA tumor viruses. It can mediate both cell proliferation and p53-dependent/independent apoptosis.                                                                                    |
| ECE2     | endothelin converting enzyme 2                                                | Endothelin-converting enzymes, such as ECE2 (EC 3.4.24.71), are type II metalloproteases that generate functionally pleiotropic members of the endothelin vasoactive peptide family.                                                                                                                                                                                                                                                     |
| EDNRB    | endothelin receptor type B                                                    | The protein encoded by this gene is a G protein-coupled receptor which activates a phosphatidylinositol-calcium second messenger system.                                                                                                                                                                                                                                                                                                 |

|        |                                                                                              |                                                                                                                                                                                                                                                                                                                                                   |
|--------|----------------------------------------------------------------------------------------------|---------------------------------------------------------------------------------------------------------------------------------------------------------------------------------------------------------------------------------------------------------------------------------------------------------------------------------------------------|
| EMX2   | empty spiracles homeobox 2                                                                   | The homeodomain transcription factor EMX2 is critical for central nervous system and urogenital development.                                                                                                                                                                                                                                      |
| EPOR   | erythropoietin receptor                                                                      | This erythropoietin receptor activates Jak2 tyrosine kinase which activates different intracellular pathways including: Ras/MAP kinase, phosphatidylinositol 3-kinase and STAT transcription factors. The stimulated erythropoietin receptor appears to have a role in erythroid cell survival.                                                   |
| EVI1   | ecotropic viral integration site 1                                                           |                                                                                                                                                                                                                                                                                                                                                   |
| FGFR2  | fibroblast growth factor receptor 2                                                          | The extracellular portion of this protein interacts with fibroblast growth factors, setting in motion a cascade of downstream signals, ultimately influencing mitogenesis and differentiation.                                                                                                                                                    |
| FOXA2  | forkhead box A2                                                                              | These hepatocyte nuclear factors are transcriptional activators for liver-specific genes such as albumin and transthyretin, and they also interact with chromatin. Similar family members have roles in the regulation of metabolism and in the differentiation of the pancreas and liver.                                                        |
| GDNF   | glial cell derived neurotrophic factor                                                       | The recombinant form of this protein was shown to promote the survival and differentiation of dopaminergic neurons in culture, and was able to prevent apoptosis of motor neurons induced by axotomy.                                                                                                                                             |
| GLI3   | GLI family zinc finger 3                                                                     | The protein encoded by this gene localizes in the cytoplasm, activates patched Drosophila homolog (PTCH) gene expression and plays a role during embryogenesis.                                                                                                                                                                                   |
| GRIN2B | glutamate receptor, ionotropic, N-methyl D-aspartate 2B                                      | This NMDA receptor channel has been shown to be involved in long-term potentiation, an activity-dependent increase in the efficiency of synaptic transmission thought to underlie certain kinds of memory and learning.                                                                                                                           |
| HES1   | hairy and enhancer of split 1, (Drosophila)                                                  | It is a transcriptional repressor of genes that require a bHLH protein for their transcription. The protein has a particular type of basic domain that contains a helix interrupting protein that binds to the N-box rather than the canonical E-box.                                                                                             |
| HESX1  | HESX homeobox 1                                                                              | This gene encodes a conserved homeobox protein that is a transcriptional repressor in the developing forebrain and pituitary gland.                                                                                                                                                                                                               |
| HGF    | hepatocyte growth factor (hepapoietin A; scatter factor)                                     | Hepatocyte growth factor regulates cell growth, cell motility, and morphogenesis by activating a tyrosine kinase signaling cascade after binding to the proto-oncogenic c-Met receptor. Its ability to stimulate mitogenesis, cell motility, and matrix invasion gives it a central role in angiogenesis, tumorogenesis, and tissue regeneration. |
| HMX2   | H6 family homeobox 2                                                                         |                                                                                                                                                                                                                                                                                                                                                   |
| HTRA2  | HtrA serine peptidase 2                                                                      | This gene encodes a serine protease. The protein is thought to induce apoptosis by binding the apoptosis inhibitory protein baculoviral IAP repeat-containing 4. Nuclear localization of this protein has also been observed.                                                                                                                     |
| ID4    | inhibitor of DNA binding 4, dominant negative helix-loop-helix protein                       | Consequently, Id proteins inhibit binding to DNA and transcriptional transactivation by heterodimerization with bHLH proteins.                                                                                                                                                                                                                    |
| IFT57  | intraflagellar transport 57 homolog (Chlamydomonas)                                          |                                                                                                                                                                                                                                                                                                                                                   |
| ITGB1  | integrin, beta 1 (fibronectin receptor, beta polypeptide, antigen CD29 includes MDF2, MSK12) | Integrin family members are membrane receptors involved in cell adhesion and recognition in a variety of processes including embryogenesis, hemostasis, tissue repair, immune response and metastatic diffusion of tumor cells.                                                                                                                   |

|        |                                                                                   |                                                                                                                                                                                                                                                                                                                 |
|--------|-----------------------------------------------------------------------------------|-----------------------------------------------------------------------------------------------------------------------------------------------------------------------------------------------------------------------------------------------------------------------------------------------------------------|
| LAMA2  | laminin, alpha 2                                                                  | Laminin, an extracellular protein, is a major component of the basement membrane. It is thought to mediate the attachment, migration, and organization of cells into tissues during embryonic development by interacting with other extracellular matrix components.                                            |
| LATS2  | LATS, large tumor suppressor, homolog 2 (Drosophila)                              | The protein localizes to centrosomes during interphase, and early and late metaphase.                                                                                                                                                                                                                           |
| LLGL1  | lethal giant larvae homolog 1 (Drosophila)                                        | This gene encodes a protein that is similar to a tumor suppressor in Drosophila.                                                                                                                                                                                                                                |
| LMX1A  | LIM homeobox transcription factor 1, alpha                                        | LMX1 is a homeodomain protein that stimulates transcription of insulin.                                                                                                                                                                                                                                         |
| MAL    | mal, T-cell differentiation protein                                               | The protein has been localized to the endoplasmic reticulum of T-cells and is a candidate linker protein in T-cell signal transduction, and in compact myelin of cells in the nervous system and has been implicated in myelin biogenesis and/or function.                                                      |
| MAPK8  | mitogen-activated protein kinase 8                                                | This kinase mediates immediate-early gene expression in response to cell stimuli and is related to cytochrome c-mediated cell death pathway. The mouse counterpart plays a key role in T cell proliferation, apoptosis and differentiation.                                                                     |
| MAPT   | microtubule-associated protein tau                                                | MAPT transcripts are differentially expressed in the nervous system, depending on stage of neuronal maturation and neuron type.                                                                                                                                                                                 |
| MET    | met proto-oncogene (hepatocyte growth factor receptor)                            | The proto-oncogene MET product is the hepatocyte growth factor receptor and encodes tyrosine-kinase activity.                                                                                                                                                                                                   |
| MOG    | myelin oligodendrocyte glycoprotein                                               | This protein may be involved in completion and maintenance of the myelin sheath and in cell-cell communication.                                                                                                                                                                                                 |
| MSX1   | msh homeobox 1                                                                    | This protein functions as a transcriptional repressor during embryogenesis through interactions with components of the core transcription complex and other homeoproteins. It may also have roles in limb-pattern formation, craniofacial development, particularly odontogenesis, and tumor growth inhibition. |
| MYO5A  | myosin VA (heavy chain 12, myoxin)                                                | Myosin V is a class of actin-based motor proteins involved in cytoplasmic vesicle transport and anchorage, spindle-pole alignment and mRNA translocation. The protein encoded by this gene is abundant in melanocytes and nerve cells.                                                                          |
| NDUFS4 | NADH dehydrogenase (ubiquinone) Fe-S protein 4, 18kDa (NADH-coenzyme Q reductase) | This accessory subunit of the mitochondrial membrane respiratory chain NADH dehydrogenase (Complex I) plays a vital role in cellular ATP production, the primary source of energy for many crucial processes in living cells.                                                                                   |
| NF1    | neurofibromin 1                                                                   | This gene product appears to function as a negative regulator of the ras signal transduction pathway.                                                                                                                                                                                                           |
| NFIB   | nuclear factor I/B                                                                |                                                                                                                                                                                                                                                                                                                 |
| NHLH2  | nescient helix loop helix 2                                                       |                                                                                                                                                                                                                                                                                                                 |
| NKX2-1 | NK2 homeobox 1                                                                    |                                                                                                                                                                                                                                                                                                                 |
| NNAT   | neuronatin                                                                        | This protein is a proteolipid that may be involved in the regulation of ion channels during brain development. The encoded protein may also play a role in forming and maintaining the structure of the nervous system.                                                                                         |
| NOG    | noggin                                                                            | This protein may have a principal role in creating morphogenic gradients, and in numerous developmental processes, such as neural tube fusion and joint formation.                                                                                                                                              |



|        |                                                                               |                                                                                                                                                                                                                                                                                                                                        |
|--------|-------------------------------------------------------------------------------|----------------------------------------------------------------------------------------------------------------------------------------------------------------------------------------------------------------------------------------------------------------------------------------------------------------------------------------|
| NR2E1  | nuclear receptor subfamily 2, group E, member 1                               |                                                                                                                                                                                                                                                                                                                                        |
| NR2F2  | nuclear receptor subfamily 2, group F, member 2                               |                                                                                                                                                                                                                                                                                                                                        |
| NRG1   | neuregulin 1                                                                  | This protein is a signaling protein that mediates cell-cell interactions and plays critical roles in the growth and development of multiple organ systems.                                                                                                                                                                             |
| NTRK2  | neurotrophic tyrosine kinase, receptor, type 2                                | This kinase is a membrane-bound receptor that, upon neurotrophin binding, phosphorylates itself and members of the MAPK pathway. Signalling through this kinase leads to cell differentiation.                                                                                                                                         |
| NTRK3  | neurotrophic tyrosine kinase, receptor, type 3                                | This kinase is a membrane-bound receptor that, upon neurotrophin binding, phosphorylates itself and members of the MAPK pathway. Signalling through this kinase leads to cell differentiation and may play a role in the development of proprioceptive neurons that sense body position.                                               |
| PARK2  | Parkinson disease (autosomal recessive, juvenile) 2, parkin                   | The encoded protein is a component of a multiprotein E3 ubiquitin ligase complex that mediates the targeting of substrate proteins for proteasomal degradation.                                                                                                                                                                        |
| POU6F1 | POU class 6 homeobox 1                                                        |                                                                                                                                                                                                                                                                                                                                        |
| PRKG1  | protein kinase, cGMP-dependent, type I                                        |                                                                                                                                                                                                                                                                                                                                        |
| PTEN   | phosphatase and tensin homolog                                                | This protein preferentially dephosphorylates phosphoinositide substrates. It negatively regulates intracellular levels of phosphatidylinositol-3,4,5-trisphosphate in cells and functions as a tumor suppressor by negatively regulating AKT/PKB signaling pathway.                                                                    |
| PYGO2  | pygopus homolog 2 (Drosophila)                                                |                                                                                                                                                                                                                                                                                                                                        |
| RBL1   | retinoblastoma-like 1 (p107)                                                  | It is thought that, given the homology to the known tumor suppressor RB1, the protein encoded by this gene may also be a tumor suppressor.                                                                                                                                                                                             |
| RCAN1  | regulator of calcineurin 1                                                    | The protein encoded by this gene interacts with calcineurin A and inhibits calcineurin-dependent signaling pathways, possibly affecting central nervous system development.                                                                                                                                                            |
| RFX4   | regulatory factor X, 4 (influences HLA class II expression)                   | This protein may be a transcriptional repressor rather than a transcriptional activator.                                                                                                                                                                                                                                               |
| SH3GL1 | SH3-domain GRB2-like 1                                                        |                                                                                                                                                                                                                                                                                                                                        |
| SLC1A2 | solute carrier family 1 (glial high affinity glutamate transporter), member 2 | The membrane-bound protein is the principal transporter that clears the excitatory neurotransmitter glutamate from the extracellular space at synapses in the central nervous system. Glutamate clearance is necessary for proper synaptic activation and to prevent neuronal damage from excessive activation of glutamate receptors. |
| SMO    | smoothened homolog (Drosophila)                                               |                                                                                                                                                                                                                                                                                                                                        |
| SOX1   | SRY (sex determining region Y)-box 1                                          | This protein is involved in the regulation of embryonic development and in the determination of the cell fate, and may be essential for lens development.                                                                                                                                                                              |
| SOX2   | SRY (sex determining region Y)-box 2                                          | This protein is required for stem-cell maintenance in the central nervous system, and also regulates gene expression in the stomach.                                                                                                                                                                                                   |
| SOX8   | SRY (sex determining region Y)-box 8                                          | This protein may act as a transcriptional activator after forming a protein complex with other proteins. This protein may be involved in brain development and function.                                                                                                                                                               |

|        |                                                      |                                                                                                                                                                                                                                                                                                                                    |
|--------|------------------------------------------------------|------------------------------------------------------------------------------------------------------------------------------------------------------------------------------------------------------------------------------------------------------------------------------------------------------------------------------------|
| SPTBN1 | spectrin, beta, non-erythrocytic 1                   | Spectrin is an actin crosslinking and molecular scaffold protein that links the plasma membrane to the actin cytoskeleton, and functions in the determination of cell shape, arrangement of transmembrane proteins, and organization of organelles.                                                                                |
| TAL2   | T-cell acute lymphocytic leukemia 2                  | Translocations between this gene on chromosome 9 and the T-cell receptor beta-chain locus on chromosome 7 have been associated with activation of the T-cell acute lymphocytic leukemia 2 gene and T-cell acute lymphoblastic leukemia.                                                                                            |
| THBS2  | thrombospondin 2                                     | This protein mediates cell-to-cell and cell-to-matrix interactions. It has been shown to function as a potent inhibitor of tumor growth and angiogenesis. Studies of the mouse counterpart suggest that this protein may modulate the cell surface properties of mesenchymal cells and be involved in cell adhesion and migration. |
| UGT8   | UDP glycosyltransferase 8                            | The key enzymatic step in the biosynthesis of galactocerebrosides consists of the transfer of galactose to ceramide catalyzed by UDP-galactose ceramide galactosyltransferase (CGT, EC 2.4.1.45).                                                                                                                                  |
| UNC5C  | unc-5 homolog C (C. elegans)                         | The UNC-5 family of receptors mediate the repellent response to netrin.                                                                                                                                                                                                                                                            |
| ZIC1   | Zic family member 1 (odd-paired homolog, Drosophila) | This gene encodes a transcription factor that can bind and transactivate the apolipoprotein E gene.                                                                                                                                                                                                                                |
| ZIC2   | Zic family member 2 (odd-paired homolog, Drosophila) | This protein functions as a transcriptional repressor and may regulate tissue specific expression of dopamine receptor D1.                                                                                                                                                                                                         |
| ZIC3   | Zic family member 3 (odd-paired homolog, Drosophila) | This nuclear protein probably functions as a transcription factor in early stages of left-right body axis formation.                                                                                                                                                                                                               |

#### Nervous System

Development and  
Function: Development:  
Development of Neurons  
(2.00E-04)

|        |                                                                     |                                                                                                                                                                                                                  |
|--------|---------------------------------------------------------------------|------------------------------------------------------------------------------------------------------------------------------------------------------------------------------------------------------------------|
| ACE    | angiotensin I converting enzyme (peptidyl-dipeptidase A) 1          | This gene encodes an enzyme involved in catalyzing the conversion of angiotensin I into a physiologically active peptide angiotensin II. This enzyme plays a key role in the renin-angiotensin system.           |
| ASCL1  | achaete-scute complex homolog 1 (Drosophila)                        | The protein activates transcription by binding to the E box. This protein plays a role in the neuronal commitment and differentiation and in the generation of olfactory and autonomic neurons.                  |
| BCL11B | B-cell CLL/lymphoma 11B (zinc finger protein)                       | The specific function of this gene has not yet been determined.                                                                                                                                                  |
| CHL1   | cell adhesion molecule with homology to L1CAM (close homolog of L1) | The protein encoded by this gene is a neural recognition molecule that may be involved in signal transduction pathways.                                                                                          |
| CNR1   | cannabinoid receptor 1 (brain)                                      | This gene encodes one of two cannabinoid receptors, which have been found to be involved in the cannabinoid-induced CNS effects (including alterations in mood and cognition) experienced by users of marijuana. |
| CTF1   | cardiotrophin 1                                                     | The protein encoded by this gene is a secreted cytokine that induces cardiac myocyte hypertrophy in vitro. It has been shown to bind and activate the ILST/gp130 receptor.                                       |
| EBF2   | early B-cell factor 2                                               | EBF2 belongs to the conserved Olf/EBF family (see MIM 164343) of helix-loop-helix transcription factors.                                                                                                         |
| EBF3   | early B-cell factor 3                                               |                                                                                                                                                                                                                  |
| ENAH   | enabled homolog (Drosophila)                                        |                                                                                                                                                                                                                  |

|         |                                                                  |                                                                                                                                                                                                                                                                                                      |
|---------|------------------------------------------------------------------|------------------------------------------------------------------------------------------------------------------------------------------------------------------------------------------------------------------------------------------------------------------------------------------------------|
| ERBB4   | v-erb-a erythroblastic leukemia viral oncogene homolog 4 (avian) | This gene encodes a protein which binds to and is activated by neuregulins and other factors and induces a variety of cellular responses including mitogenesis and differentiation.                                                                                                                  |
| FGF2    | fibroblast growth factor 2 (basic)                               | The CUG-initiated isoforms of this gene are localized in the nucleus and are responsible for the intracrine effect, whereas, the AUG-initiated form is mostly cytosolic and is responsible for the paracrine and autocrine effects of this FGF.                                                      |
| FGFR2   | fibroblast growth factor receptor 2                              | The extracellular portion of this protein interacts with fibroblast growth factors, setting in motion a cascade of downstream signals, ultimately influencing mitogenesis and differentiation.                                                                                                       |
| GDNF    | glial cell derived neurotrophic factor                           | The recombinant form of this protein was shown to promote the survival and differentiation of dopaminergic neurons in culture, and was able to prevent apoptosis of motor neurons induced by axotomy.                                                                                                |
| HES1    | hairy and enhancer of split 1, (Drosophila)                      | It is a transcriptional repressor of genes that require a bHLH protein for their transcription. The protein has a particular type of basic domain that contains a helix interrupting protein that binds to the N-box rather than the canonical E-box.                                                |
| HEY1    | hairy/enhancer-of-split related with YRPW motif 1                | This gene encodes a transcriptional repressor. Two similar and redundant genes in mouse are required for embryonic cardiovascular development, and are also implicated in neurogenesis and somitogenesis.                                                                                            |
| HTRA2   | HtrA serine peptidase 2                                          | This gene encodes a serine protease. The protein is thought to induce apoptosis by binding the apoptosis inhibitory protein baculoviral IAP repeat-containing 4. Nuclear localization of this protein has also been observed.                                                                        |
| KCNJ10  | potassium inwardly-rectifying channel, subfamily J, member 10    | This protein may form a heterodimer with another potassium channel protein and may be responsible for the potassium buffering action of glial cells in the brain.                                                                                                                                    |
| LHX8    | LIM homeobox 8                                                   | Members of the LIM homeobox gene family, such as LHX8, encode transcription regulators that share common structural features. Members of the LIM homeobox gene family are required for the patterning or the specification and differentiation of different cell types during embryonic development. |
| MNX1    | motor neuron and pancreas homeobox 1                             |                                                                                                                                                                                                                                                                                                      |
| NCAM1   | neural cell adhesion molecule 1                                  |                                                                                                                                                                                                                                                                                                      |
| NCAM2   | neural cell adhesion molecule 2                                  | The protein may function in selective fasciculation and zone-to-zone projection of the primary olfactory axons.                                                                                                                                                                                      |
| NEUROD2 | neurogenic differentiation 2                                     | Expression of this gene can induce transcription from neuron-specific promoters, such as the GAP-43 promoter, which contain a specific DNA sequence known as an E-box. The product of this gene is thought to play a role in the determination and maintenance of neuronal cell fates.               |
| NKX2-1  | NK2 homeobox 1                                                   |                                                                                                                                                                                                                                                                                                      |
| NRP2    | neuropilin 2                                                     | The encoded transmembrane protein binds to SEMA3C protein and SEMA3F protein, and interacts with vascular endothelial growth factor (VEGF). This protein may play a role in cardiovascular development, axon guidance, and tumorigenesis.                                                            |
| NRTN    | neurturin                                                        | Neurturin is a member of the TGF-beta subfamily, TRN. This gene signals through RET and a GPI-linked coreceptor, and promotes survival of neuronal populations.                                                                                                                                      |

|                                                                                                                           |        |                                                                                              |                                                                                                                                                                                                                                                                                                                                    |
|---------------------------------------------------------------------------------------------------------------------------|--------|----------------------------------------------------------------------------------------------|------------------------------------------------------------------------------------------------------------------------------------------------------------------------------------------------------------------------------------------------------------------------------------------------------------------------------------|
|                                                                                                                           | NTRK3  | neurotrophic tyrosine kinase, receptor, type 3                                               | This kinase is a membrane-bound receptor that, upon neurotrophin binding, phosphorylates itself and members of the MAPK pathway. Signalling through this kinase leads to cell differentiation and may play a role in the development of proprioceptive neurons that sense body position.                                           |
|                                                                                                                           | PAX5   | paired box 5                                                                                 | This gene encodes the B-cell lineage specific activator protein that is expressed at early, but not late stages of B-cell differentiation. It may also play a role in neural development and spermatogenesis.                                                                                                                      |
|                                                                                                                           | PBX3   | pre-B-cell leukemia homeobox 3                                                               |                                                                                                                                                                                                                                                                                                                                    |
|                                                                                                                           | POU4F1 | POU class 4 homeobox 1                                                                       | POU4F1 is a class IV POU domain-containing transcription factor highly expressed in the developing sensory nervous system and in cells of the B- and T-lymphocytic lineages.                                                                                                                                                       |
|                                                                                                                           | PTN    | pleiotrophin                                                                                 |                                                                                                                                                                                                                                                                                                                                    |
|                                                                                                                           | THBS2  | thrombospondin 2                                                                             | This protein mediates cell-to-cell and cell-to-matrix interactions. It has been shown to function as a potent inhibitor of tumor growth and angiogenesis. Studies of the mouse counterpart suggest that this protein may modulate the cell surface properties of mesenchymal cells and be involved in cell adhesion and migration. |
|                                                                                                                           | VSX1   | visual system homeobox 1                                                                     | The encoded protein may regulate expression of the cone opsin genes early in development.                                                                                                                                                                                                                                          |
| <hr/>                                                                                                                     |        |                                                                                              |                                                                                                                                                                                                                                                                                                                                    |
| Nervous System<br>Development and<br>Function: Development:<br>Development of<br>Schwann Cells (1.24E-03)                 | FGF2   | fibroblast growth factor 2 (basic)                                                           | The CUG-initiated isoforms of this gene are localized in the nucleus and are responsible for the intracrine effect, whereas, the AUG-initiated form is mostly cytosolic and is responsible for the paracrine and autocrine effects of this FGF.                                                                                    |
|                                                                                                                           | ITGB1  | integrin, beta 1 (fibronectin receptor, beta polypeptide, antigen CD29 includes MDF2, MSK12) | Integrin family members are membrane receptors involved in cell adhesion and recognition in a variety of processes including embryogenesis, hemostasis, tissue repair, immune response and metastatic diffusion of tumor cells.                                                                                                    |
|                                                                                                                           | NF1    | neurofibromin 1                                                                              | This gene product appears to function as a negative regulator of the ras signal transduction pathway.                                                                                                                                                                                                                              |
|                                                                                                                           | NRG1   | neuregulin 1                                                                                 | This protein is a signaling protein that mediates cell-cell interactions and plays critical roles in the growth and development of multiple organ systems.                                                                                                                                                                         |
|                                                                                                                           | POU3F1 | POU class 3 homeobox 1                                                                       |                                                                                                                                                                                                                                                                                                                                    |
|                                                                                                                           | POU3F2 | POU class 3 homeobox 2                                                                       | Class III POU genes are expressed predominantly in the central nervous system (CNS). It is likely that CNS-specific transcription factors such as these play an important role in mammalian neurogenesis.                                                                                                                          |
| <hr/>                                                                                                                     |        |                                                                                              |                                                                                                                                                                                                                                                                                                                                    |
| Nervous System<br>Development and<br>Function: Development:<br>Development of Olfactory<br>Receptor Neurons<br>(4.86E-03) | EBF2   | early B-cell factor 2                                                                        | EBF2 belongs to the conserved Olf/EBF family (see MIM 164343) of helix-loop-helix transcription factors.                                                                                                                                                                                                                           |
|                                                                                                                           | EBF3   | early B-cell factor 3                                                                        |                                                                                                                                                                                                                                                                                                                                    |
|                                                                                                                           | NCAM2  | neural cell adhesion molecule 2                                                              | The protein may function in selective fasciculation and zone-to-zone projection of the primary olfactory axons.                                                                                                                                                                                                                    |

Nervous System

Development and

Function: Development:  
Development of  
Astrocytes (1.70E-02)

|        |                                                                        |                                                                                                                                                                                                           |
|--------|------------------------------------------------------------------------|-----------------------------------------------------------------------------------------------------------------------------------------------------------------------------------------------------------|
| NF1    | neurofibromin 1                                                        | This gene product appears to function as a negative regulator of the ras signal transduction pathway.                                                                                                     |
| POU3F2 | POU class 3 homeobox 2                                                 | Class III POU genes are expressed predominantly in the central nervous system (CNS). It is likely that CNS-specific transcription factors such as these play an important role in mammalian neurogenesis. |
| RBPJ   | recombination signal binding protein for immunoglobulin kappa J region |                                                                                                                                                                                                           |

Nervous System

Development and

Function: Development:  
Development of  
Trigeminal Ganglion  
Neurons (1.70E-02)

|        |                                        |                                                                                                                                                                                                       |
|--------|----------------------------------------|-------------------------------------------------------------------------------------------------------------------------------------------------------------------------------------------------------|
| GDNF   | glial cell derived neurotrophic factor | The recombinant form of this protein was shown to promote the survival and differentiation of dopaminergic neurons in culture, and was able to prevent apoptosis of motor neurons induced by axotomy. |
| NRTN   | neurturin                              | Neurturin is a member of the TGF-beta subfamily, TRN. This gene signals through RET and a GPI-linked coreceptor, and promotes survival of neuronal populations.                                       |
| POU4F1 | POU class 4 homeobox 1                 | POU4F1 is a class IV POU domain-containing transcription factor highly expressed in the developing sensory nervous system and in cells of the B- and T-lymphocytic lineages.                          |

Nervous System

Development and

Function: Branching:  
Branching of Neurites  
(3.32E-04) *including*  
Branching of Dendrites  
(3.21E-04)

|        |                                                |                                                                                                                                                                                                                                                                    |
|--------|------------------------------------------------|--------------------------------------------------------------------------------------------------------------------------------------------------------------------------------------------------------------------------------------------------------------------|
| BSN    | bassoon (presynaptic cytomatrix protein)       | The protein encoded by this gene is thought to be a scaffolding protein involved in organizing the presynaptic cytoskeleton, primarily in neurons in the brain.                                                                                                    |
| CRH    | corticotropin releasing hormone                | CRH is secreted by the paraventricular nucleus (PVN) of the hypothalamus in response to stress. In the placenta CRH is a marker that determines the length of gestation and the timing of parturition and delivery. CRH may also act as a trigger for parturition. |
| CRHR1  | corticotropin releasing hormone receptor 1     | The encoded protein is essential for the activation of signal transduction pathways that regulate diverse physiological processes including stress, reproduction, immune response and obesity.                                                                     |
| CTNNA2 | catenin (cadherin-associated protein), alpha 2 |                                                                                                                                                                                                                                                                    |
| DIAPH1 | diaphanous homolog 1 (Drosophila)              | This gene may have a role in the regulation of actin polymerization in hair cells of the inner ear.                                                                                                                                                                |
| FGF2   | fibroblast growth factor 2 (basic)             | The CUG-initiated isoforms of this gene are localized in the nucleus and are responsible for the intracrine effect, whereas, the AUG-initiated form is mostly cytosolic and is responsible for the paracrine and autocrine effects of this FGF.                    |

|        |                                                                                        |                                                                                                                                                                                                                                                                                                                                                   |
|--------|----------------------------------------------------------------------------------------|---------------------------------------------------------------------------------------------------------------------------------------------------------------------------------------------------------------------------------------------------------------------------------------------------------------------------------------------------|
| HGF    | hepatocyte growth factor (hepapoietin A; scatter factor)                               | Hepatocyte growth factor regulates cell growth, cell motility, and morphogenesis by activating a tyrosine kinase signaling cascade after binding to the proto-oncogenic c-Met receptor. Its ability to stimulate mitogenesis, cell motility, and matrix invasion gives it a central role in angiogenesis, tumorigenesis, and tissue regeneration. |
| KNDC1  | kinase non-catalytic C-lobe domain (KIND) containing 1 met proto-oncogene              |                                                                                                                                                                                                                                                                                                                                                   |
| MET    | (hepatocyte growth factor receptor)                                                    | The proto-oncogene MET product is the hepatocyte growth factor receptor and encodes tyrosine-kinase activity.                                                                                                                                                                                                                                     |
| MUSK   | muscle, skeletal, receptor tyrosine kinase                                             | This kinase activity is regulated by the binding of a cognate ligand to the extracellular portion of the receptor. DeChiara et al. (1996) [PubMed 8653786] noted that the RTKs, known to be expressed in cell type-specific fashions, play a role critical for the growth and differentiation of those cell types.                                |
| NEFL   | neurofilament, light polypeptide                                                       | Neurofilaments are type IV intermediate filament heteropolymers composed of light, medium, and heavy chains. Neurofilaments comprise the axoskeleton and they functionally maintain the neuronal caliber. They may also play a role in intracellular transport to axons and dendrites. This gene encodes the light chain neurofilament protein.   |
| NF1    | neurofibromin 1                                                                        | This gene product appears to function as a negative regulator of the ras signal transduction pathway.                                                                                                                                                                                                                                             |
| NOS1   | nitric oxide synthase 1 (neuronal)                                                     | Nitric oxide is a reactive free radical which mediates neurotransmission and antimicrobial and antitumoral activities. Nitric oxide is synthesized from L-arginine by nitric oxide synthases. This gene encodes a nitric oxide synthase which is highly expressed in skeletal muscle.                                                             |
| NTRK2  | neurotrophic tyrosine kinase, receptor, type 2                                         | This kinase is a membrane-bound receptor that, upon neurotrophin binding, phosphorylates itself and members of the MAPK pathway. Signalling through this kinase leads to cell differentiation.                                                                                                                                                    |
| NTRK3  | neurotrophic tyrosine kinase, receptor, type 3                                         | This kinase is a membrane-bound receptor that, upon neurotrophin binding, phosphorylates itself and members of the MAPK pathway. Signalling through this kinase leads to cell differentiation and may play a role in the development of proprioceptive neurons that sense body position.                                                          |
| PRKG1  | protein kinase, cGMP-dependent, type I                                                 |                                                                                                                                                                                                                                                                                                                                                   |
| ROBO2  | roundabout, axon guidance receptor, homolog 2 (Drosophila)                             | The encoded protein is a receptor for SLIT2, molecules known to function in axon guidance and cell migration.                                                                                                                                                                                                                                     |
| ROR2   | receptor tyrosine kinase-like orphan receptor 2                                        | The protein may be involved in the early formation of the chondrocytes and may be required for cartilage and growth plate development.                                                                                                                                                                                                            |
| SEMA3E | sema domain, immunoglobulin domain (Ig), short basic domain, secreted, (semaphorin) 3E | These proteins are involved in embryonic development, and some behave as neural guidance molecules.                                                                                                                                                                                                                                               |
| SP4    | Sp4 transcription factor                                                               |                                                                                                                                                                                                                                                                                                                                                   |
| UGCG   | UDP-glucose ceramide glucosyltransferase                                               | The product of this protein, glucosylceramide, is the core structure of more than 300 Glycosphingolipids. UGCG is widely expressed and transcription is upregulated during keratinocyte differentiation.                                                                                                                                          |
| ULK2   | unc-51-like kinase 2 (C. elegans)                                                      | This gene encodes a protein that is similar to a serine/threonine kinase in C. elegans which is involved in axonal elongation.                                                                                                                                                                                                                    |

Nervous System  
Development and  
Function: Formation:

Formation of Neuroglia  
(5.00E-03) *including*  
Formation of  
Oligodendrocytes (8.23E-  
04)

|        |                                                                        |                                                                                                                                                                                                                                                 |
|--------|------------------------------------------------------------------------|-------------------------------------------------------------------------------------------------------------------------------------------------------------------------------------------------------------------------------------------------|
| ASCL1  | achaete-scute complex homolog 1 (Drosophila)                           | The protein activates transcription by binding to the E box. This protein plays a role in the neuronal commitment and differentiation and in the generation of olfactory and autonomic neurons.                                                 |
| ERBB4  | v-erb-a erythroblastic leukemia viral oncogene homolog 4 (avian)       | This gene encodes a protein which binds to and is activated by neuregulins and other factors and induces a variety of cellular responses including mitogenesis and differentiation.                                                             |
| FGF2   | fibroblast growth factor 2 (basic)                                     | The CUG-initiated isoforms of this gene are localized in the nucleus and are responsible for the intracrine effect, whereas, the AUG-initiated form is mostly cytosolic and is responsible for the paracrine and autocrine effects of this FGF. |
| NKX2-1 | NK2 homeobox 1                                                         |                                                                                                                                                                                                                                                 |
| NRG1   | neuregulin 1                                                           | This protein is a signaling protein that mediates cell-cell interactions and plays critical roles in the growth and development of multiple organ systems.                                                                                      |
| RBPJ   | recombination signal binding protein for immunoglobulin kappa J region |                                                                                                                                                                                                                                                 |

Nervous System  
Development and  
Function: Neurogenesis:  
Neurogenesis (9.64E-04)

|       |                                                   |                                                                                                                                                                                                      |
|-------|---------------------------------------------------|------------------------------------------------------------------------------------------------------------------------------------------------------------------------------------------------------|
| ABI2  | abl interactor 2                                  |                                                                                                                                                                                                      |
| ACSL6 | acyl-CoA synthetase long-chain family member 6    |                                                                                                                                                                                                      |
| ACSL1 | acyl-CoA synthetase long-chain family member 1    | The protein converts free long-chain fatty acids into fatty acyl-CoA esters, and thereby play a key role in lipid biosynthesis and fatty acid degradation.                                           |
| ATXN3 | ataxin 3                                          | The protein encoded by this gene contains (CAG) <sub>n</sub> repeats in the coding region, and the expansion of these repeats from the normal 13-36 to 68-79 is the cause of Machado-Joseph disease. |
| BCL2  | B-cell CLL/lymphoma 2                             | This gene encodes an integral outer mitochondrial membrane protein that blocks the apoptotic death of some cells such as lymphocytes.                                                                |
| BMP7  | bone morphogenetic protein 7                      | Based on its expression early in embryogenesis, the BMP encoded by this gene has a proposed role in early development and possible bone inductive activity.                                          |
| BPNT1 | 3'(2'), 5'-bisphosphate nucleotidase 1            | BPntase's physiologic role in nucleotide metabolism may be regulated by inositol signaling pathways.                                                                                                 |
| CD24  | CD24 molecule                                     | This gene encodes a sialoglycoprotein that is expressed on mature granulocytes and in many B cells.                                                                                                  |
| CHERP | calcium homeostasis endoplasmic reticulum protein |                                                                                                                                                                                                      |

|        |                                                                  |                                                                                                                                                                                                                                                                                                                                                                     |
|--------|------------------------------------------------------------------|---------------------------------------------------------------------------------------------------------------------------------------------------------------------------------------------------------------------------------------------------------------------------------------------------------------------------------------------------------------------|
| CHRM1  | cholinergic receptor, muscarinic 1                               | The muscarinic cholinergic receptor 1 is involved in mediation of vagally-induced bronchoconstriction and in the acid secretion of the gastrointestinal tract.                                                                                                                                                                                                      |
| CHRM3  | cholinergic receptor, muscarinic 3                               | The muscarinic cholinergic receptor 3 controls smooth muscle contraction and its stimulation causes secretion of glandular tissue.                                                                                                                                                                                                                                  |
| CHRN2  | cholinergic receptor, nicotinic, beta 2 (neuronal)               | The protein encoded by this gene belongs to a superfamily of ligand-gated ion channels which allow the flow of sodium and potassium across the plasma membrane in response to ligands such as acetylcholine and nicotine.                                                                                                                                           |
| CNR1   | cannabinoid receptor 1 (brain)                                   | This gene encodes one of two cannabinoid receptors, which have been found to be involved in the cannabinoid-induced CNS effects (including alterations in mood and cognition) experienced by users of marijuana.                                                                                                                                                    |
| CNTN3  | contactin 3 (plasmacytoma associated)                            |                                                                                                                                                                                                                                                                                                                                                                     |
| CSF3   | colony stimulating factor 3 (granulocyte)                        | The protein encoded by this gene is a cytokine that controls the production, differentiation, and function of granulocytes.                                                                                                                                                                                                                                         |
| CTF1   | cardiotrophin 1                                                  | The protein encoded by this gene is a secreted cytokine that induces cardiac myocyte hypertrophy in vitro. It has been shown to bind and activate the ILST/gp130 receptor.                                                                                                                                                                                          |
| DCC    | deleted in colorectal carcinoma                                  |                                                                                                                                                                                                                                                                                                                                                                     |
| DCLK1  | doublecortin-like kinase 1                                       | DCAMKL1 is a microtubule-associated protein that phosphorylates itself and myelin basic protein (MBP; MIM 159430).                                                                                                                                                                                                                                                  |
| DISC1  | disrupted in schizophrenia 1                                     | The protein is involved in neurite outgrowth and cortical development through its interaction with other proteins.                                                                                                                                                                                                                                                  |
| DLG4   | discs, large homolog 4 (Drosophila)                              | This MAGUK protein may interact at postsynaptic sites to form a multimeric scaffold for the clustering of receptors, ion channels, and associated signaling proteins.                                                                                                                                                                                               |
| DLL3   | delta-like 3 (Drosophila)                                        | This gene encodes a member of the delta protein ligand family. This family functions as Notch ligands that are characterized by a DSL domain, EGF repeats, and a transmembrane domain.                                                                                                                                                                              |
| DOK5   | docking protein 5                                                | This protein interacts with phosphorylated receptor tyrosine kinases to mediate neurite outgrowth and activation of the MAP kinase pathway.                                                                                                                                                                                                                         |
| DPYSL3 | dihydropyrimidinase-like 3                                       |                                                                                                                                                                                                                                                                                                                                                                     |
| DPYSL5 | dihydropyrimidinase-like 5                                       | Members of the CRMP family, such as DPYSL5, are believed to play a role in growth cone guidance during neural development.                                                                                                                                                                                                                                          |
| DSCAM  | Down syndrome cell adhesion molecule                             |                                                                                                                                                                                                                                                                                                                                                                     |
| EFNB3  | ephrin-B3                                                        | EFNB3, a member of the ephrin gene family, is important in brain development as well as in its maintenance. It may play a pivotal role in forebrain function. The EPH and EPH-related receptors comprise the largest subfamily of receptor protein-tyrosine kinases and have been implicated in mediating developmental events, particularly in the nervous system. |
| ERBB4  | v-erb-a erythroblastic leukemia viral oncogene homolog 4 (avian) | This gene encodes a protein which binds to and is activated by neuregulins and other factors and induces a variety of cellular responses including mitogenesis and differentiation.                                                                                                                                                                                 |
| FABP7  | fatty acid binding protein 7, brain                              | The protein encoded by this gene is a brain fatty acid binding protein which is thought to play roles in fatty acid uptake, transport, and metabolism.                                                                                                                                                                                                              |



|        |                                                         |                                                                                                                                                                                                                                                                                                     |
|--------|---------------------------------------------------------|-----------------------------------------------------------------------------------------------------------------------------------------------------------------------------------------------------------------------------------------------------------------------------------------------------|
| FGF1   | fibroblast growth factor 1 (acidic)                     | This protein functions as a modifier of endothelial cell migration and proliferation, as well as an angiogenic factor. It acts as a mitogen for a variety of mesoderm- and neuroectoderm-derived cells in vitro, thus is thought to be involved in organogenesis.                                   |
| FGF2   | fibroblast growth factor 2 (basic)                      | The CUG-initiated isoforms of this gene are localized in the nucleus and are responsible for the intracrine effect, whereas, the AUG-initiated form is mostly cytosolic and is responsible for the paracrine and autocrine effects of this FGF.                                                     |
| FGF5   | fibroblast growth factor 5                              | This gene was identified as an oncogene, which confers transforming potential when transfected into mammalian cells.                                                                                                                                                                                |
| FGF13  | fibroblast growth factor 13                             | This gene is a possible candidate gene for familial cases of the BFLS, and for other syndromal and nonspecific forms of X-linked mental retardation, due to its chromosomal location.                                                                                                               |
| FGF14  | fibroblast growth factor 14                             | FGF family members possess broad mitogenic and cell survival activities, and are involved in a variety of biological processes, including embryonic development, cell growth, morphogenesis, tissue repair, tumor growth and invasion.                                                              |
| FGF17  | fibroblast growth factor 17                             | This gene is predominately expressed in the cerebellum and cortex. In mice it is localized to specific sites in the midline structures of the forebrain, the midbrain-hindbrain junction, developing skeleton and developing arteries, which suggests a role in CNS, bone and vascular development. |
| FGF18  | fibroblast growth factor 18                             | This protein may be a pleiotropic growth factor that stimulates proliferation in many tissues, notably the liver and small intestine. Knockout studies in mice implied the its role in regulating proliferation and differentiation of midline cerebellar structures.                               |
| FKTN   | fukutin                                                 | The protein encoded by this gene may be involved in the glycosylation of alpha-dystroglycan in skeletal muscle. The encoded protein is thought to be a glycosyltransferase and could play a role in brain development.                                                                              |
| FUT9   | fucosyltransferase 9 (alpha (1,3) fucosyltransferase)   | FUT9 synthesizes the LeX oligosaccharide (CD15), which is expressed in organ buds progressing in mesenchyma during human embryogenesis.                                                                                                                                                             |
| GDNF   | glial cell derived neurotrophic factor                  | The recombinant form of this protein was shown to promote the survival and differentiation of dopaminergic neurons in culture, and was able to prevent apoptosis of motor neurons induced by axotomy.                                                                                               |
| GLI3   | GLI family zinc finger 3                                | The protein encoded by this gene localizes in the cytoplasm, activates patched Drosophila homolog (PTCH) gene expression and plays a role during embryogenesis.                                                                                                                                     |
| GRIN3A | glutamate receptor, ionotropic, N-methyl-D-aspartate 3A | Studies suggest that this gene may be involved in the development of synaptic elements by modulating NMDA receptor activity.                                                                                                                                                                        |
| HDAC9  | histone deacetylase 9                                   | Histone acetylation/deacetylation alters chromosome structure and affects transcription factor access to DNA. The protein encoded by this gene has sequence homology to members of the histone deacetylase family. This encoded protein may play a role in hematopoiesis.                           |
| HES1   | hairy and enhancer of split 1, (Drosophila)             | It is a transcriptional repressor of genes that require a bHLH protein for their transcription. The protein has a particular type of basic domain that contains a helix interrupting protein that binds to the N-box rather than the canonical E-box.                                               |
| HEY1   | hairy/enhancer-of-split related with YRPW motif 1       | This gene encodes a transcriptional repressor. Two similar and redundant genes in mouse are required for embryonic cardiovascular development, and are also implicated in neurogenesis and somitogenesis.                                                                                           |

|         |                                                                                              |                                                                                                                                                                                                                                                                                                                                                   |
|---------|----------------------------------------------------------------------------------------------|---------------------------------------------------------------------------------------------------------------------------------------------------------------------------------------------------------------------------------------------------------------------------------------------------------------------------------------------------|
| HGF     | hepatocyte growth factor (hepapoietin A; scatter factor)                                     | Hepatocyte growth factor regulates cell growth, cell motility, and morphogenesis by activating a tyrosine kinase signaling cascade after binding to the proto-oncogenic c-Met receptor. Its ability to stimulate mitogenesis, cell motility, and matrix invasion gives it a central role in angiogenesis, tumorigenesis, and tissue regeneration. |
| HHIP    | hedgehog interacting protein                                                                 | This protein similar to the mouse hedgehog-interacting protein, which is involved in many fundamental processes in embryonic development, including anteroposterior patterns of limbs and regulation of left-right asymmetry.                                                                                                                     |
| ID4     | inhibitor of DNA binding 4, dominant negative helix-loop-helix protein                       | Consequently, Id proteins inhibit binding to DNA and transcriptional transactivation by heterodimerization with bHLH proteins.                                                                                                                                                                                                                    |
| IGF1    | insulin-like growth factor 1 (somatomedin C)                                                 | The protein encoded by this gene is similar to insulin in function and structure and is a member of a family of proteins involved in mediating growth and development.                                                                                                                                                                            |
| IL3     | interleukin 3 (colony-stimulating factor, multiple)                                          | This protein is a potent growth promoting cytokine, especially with hematopoietic cell types. It is involved in cell growth, differentiation and apoptosis, and also possesses neurotrophic activity.                                                                                                                                             |
| IL11    | interleukin 11                                                                               | This cytokine is shown to stimulate the T-cell-dependent development of immunoglobulin-producing B cells. It is also found to support the proliferation of hematopoietic stem cells and megakaryocyte progenitor cells.                                                                                                                           |
| ITGB1   | integrin, beta 1 (fibronectin receptor, beta polypeptide, antigen CD29 includes MDF2, MSK12) | Integrin family members are membrane receptors involved in cell adhesion and recognition in a variety of processes including embryogenesis, hemostasis, tissue repair, immune response and metastatic diffusion of tumor cells.                                                                                                                   |
| KCNQ2   | potassium voltage-gated channel, KQT-like subfamily, member 2                                | The M channel is a slowly activating and deactivating potassium channel that plays a critical role in the regulation of neuronal excitability.                                                                                                                                                                                                    |
| KNDC1   | kinase non-catalytic C-lobe domain (KIND) containing 1                                       |                                                                                                                                                                                                                                                                                                                                                   |
| LAMA2   | laminin, alpha 2                                                                             | Laminin, an extracellular protein, is a major component of the basement membrane. It is thought to mediate the attachment, migration, and organization of cells into tissues during embryonic development by interacting with other extracellular matrix components.                                                                              |
| LZTS1   | leucine zipper, putative tumor suppressor 1                                                  |                                                                                                                                                                                                                                                                                                                                                   |
| MAB21L2 | mab-21-like 2 (C. elegans)                                                                   | This gene may be involved in neural development.                                                                                                                                                                                                                                                                                                  |
| MAPT    | microtubule-associated protein tau                                                           | MAPT transcripts are differentially expressed in the nervous system, depending on stage of neuronal maturation and neuron type.                                                                                                                                                                                                                   |
| MCF2    | MCF.2 cell line derived transforming sequence                                                | MCF2 is a member of a large family of GDP-GTP exchange factors that modulate the activity of small GTPases of the Rho family.                                                                                                                                                                                                                     |
| MET     | met proto-oncogene (hepatocyte growth factor receptor)                                       | The proto-oncogene MET product is the hepatocyte growth factor receptor and encodes tyrosine-kinase activity.                                                                                                                                                                                                                                     |
| MOBP    | myelin-associated oligodendrocyte basic protein                                              |                                                                                                                                                                                                                                                                                                                                                   |

|         |                                                                              |                                                                                                                                                                                                                                                                                                                     |
|---------|------------------------------------------------------------------------------|---------------------------------------------------------------------------------------------------------------------------------------------------------------------------------------------------------------------------------------------------------------------------------------------------------------------|
| MYCN    | v-myc myelocytomatosis viral related oncogene, neuroblastoma derived (avian) | This gene is a member of the MYC family and encodes a protein with a basic helix-loop-helix (bHLH) domain. This protein is located in the nucleus and must dimerize with another bHLH protein in order to bind DNA. Amplification of this gene is associated with a variety of tumors, most notably neuroblastomas. |
| NAGLU   | N-acetylglucosaminidase, alpha-                                              | This gene encodes an enzyme that degrades heparan sulfate by hydrolysis of terminal N-acetyl-D-glucosamine residues in N-acetyl-alpha-D-glucosaminides.                                                                                                                                                             |
| NAV2    | neuron navigator 2                                                           | The vitamin A metabolite, all-trans retinoic acid (atRA), plays an important role in neuronal development, including neurite outgrowth.                                                                                                                                                                             |
| NCAM1   | neural cell adhesion molecule 1                                              |                                                                                                                                                                                                                                                                                                                     |
| NEUROD2 | neurogenic differentiation 2                                                 | Expression of this gene can induce transcription from neuron-specific promoters, such as the GAP-43 promoter, which contain a specific DNA sequence known as an E-box. The product of this gene is thought to play a role in the determination and maintenance of neuronal cell fates.                              |
| NF1     | neurofibromin 1                                                              | This gene product appears to function as a negative regulator of the ras signal transduction pathway.                                                                                                                                                                                                               |
| NOG     | noggin                                                                       | This protein may have a principal role in creating morphogenic gradients, and in numerous developmental processes, such as neural tube fusion and joint formation.                                                                                                                                                  |
| NOVA1   | neuro-oncological ventral antigen 1                                          | This gene encodes a neuron-specific RNA-binding protein, a member of the Nova family of paraneoplastic disease antigens, that is recognized and inhibited by paraneoplastic antibodies.                                                                                                                             |
| NR2E1   | nuclear receptor subfamily 2, group E, member 1                              |                                                                                                                                                                                                                                                                                                                     |
| NRG1    | neuregulin 1                                                                 | This protein is a signaling protein that mediates cell-cell interactions and plays critical roles in the growth and development of multiple organ systems.                                                                                                                                                          |
| NTRK2   | neurotrophic tyrosine kinase, receptor, type 2                               | This kinase is a membrane-bound receptor that, upon neurotrophin binding, phosphorylates itself and members of the MAPK pathway. Signalling through this kinase leads to cell differentiation.                                                                                                                      |
| OTP     | orthopedia homeobox                                                          | This protein may function during brain development.                                                                                                                                                                                                                                                                 |
| PAX3    | paired box 3                                                                 | Members of the PAX family play critical roles during fetal development.                                                                                                                                                                                                                                             |
| PCDHA2  | protocadherin alpha 2                                                        | These neural cadherin-like cell adhesion proteins are integral plasma membrane proteins that most likely play a critical role in the establishment and function of specific cell-cell connections in the brain.                                                                                                     |
| PCDHAC2 | protocadherin alpha subfamily C, 2                                           | These neural cadherin-like cell adhesion proteins are integral plasma membrane proteins that most likely play a critical role in the establishment and function of specific cell-cell connections in the brain.                                                                                                     |
| PCDHB15 | protocadherin beta 15                                                        | These neural cadherin-like cell adhesion proteins are integral plasma membrane proteins, whose functions are unknown but most likely play a critical role in the establishment and function of specific cell-cell neural connections.                                                                               |
| PIAS2   | protein inhibitor of activated STAT, 2                                       | This gene encodes a protein involved in the regulation of transcription factors involved in MAP kinase signaling.                                                                                                                                                                                                   |
| PLXNA3  | plexin A3                                                                    |                                                                                                                                                                                                                                                                                                                     |
| PLXNA4  | plexin A4                                                                    |                                                                                                                                                                                                                                                                                                                     |
| POU3F2  | POU class 3 homeobox 2                                                       | Class III POU genes are expressed predominantly in the central nervous system (CNS). It is likely that CNS-specific transcription factors such as these play an important role in mammalian neurogenesis.                                                                                                           |
| POU4F1  | POU class 4 homeobox 1                                                       | POU4F1 is a class IV POU domain-containing transcription factor highly expressed in the developing sensory nervous system and in cells of the B- and T-lymphocytic lineages.                                                                                                                                        |

|        |                                                                                                                  |                                                                                                                                                                                                                                                                                                                                        |
|--------|------------------------------------------------------------------------------------------------------------------|----------------------------------------------------------------------------------------------------------------------------------------------------------------------------------------------------------------------------------------------------------------------------------------------------------------------------------------|
| POU4F2 | POU class 4 homeobox 2                                                                                           | POU4F2 is found in human retina exclusively within a subpopulation of ganglion cells where it may play a role in determining or maintaining the identities of a small subset of visual system neurons.                                                                                                                                 |
| PRKG1  | protein kinase, cGMP-dependent, type I                                                                           |                                                                                                                                                                                                                                                                                                                                        |
| PTN    | pleiotrophin                                                                                                     |                                                                                                                                                                                                                                                                                                                                        |
| PXMP3  | peroxisomal membrane protein 3, 35kDa                                                                            | This integral peroxisomal membrane protein is required for peroxisome biogenesis, and is thought to be involved in peroxisomal matrix protein import.                                                                                                                                                                                  |
| RBL1   | retinoblastoma-like 1 (p107)                                                                                     | It is thought that, given the homology to the known tumor suppressor RB1, the protein encoded by this gene may also be a tumor suppressor.                                                                                                                                                                                             |
| SCN2A  | sodium channel, voltage-gated, type II, alpha subunit                                                            | This gene encodes one member of the sodium channel alpha subunit gene family, which is heterogeneously expressed in the brain.                                                                                                                                                                                                         |
| SEMA4F | sema domain, immunoglobulin domain (Ig), transmembrane domain (TM) and short cytoplasmic domain, (semaphorin) 4F |                                                                                                                                                                                                                                                                                                                                        |
| SHOX2  | short stature homeobox 2                                                                                         | SHOX is a pseudoautosomal homeo box gene that is thought to be responsible for idiopathic short stature and implicated to play a role in the short stature phenotype of Turner syndrome patients.                                                                                                                                      |
| SIM1   | single-minded homolog 1 (Drosophila)                                                                             | SIM1 transcript was detected only in fetal kidney out of various adult and fetal tissues tested, and it is a candidate for involvement in certain dysmorphic features (particularly the facial and skull characteristics), abnormalities of brain development, and/or mental retardation of Down syndrome.                             |
| SLC1A2 | solute carrier family 1 (glial high affinity glutamate transporter), member 2                                    | The membrane-bound protein is the principal transporter that clears the excitatory neurotransmitter glutamate from the extracellular space at synapses in the central nervous system. Glutamate clearance is necessary for proper synaptic activation and to prevent neuronal damage from excessive activation of glutamate receptors. |
| SMO    | smoothened homolog (Drosophila)                                                                                  |                                                                                                                                                                                                                                                                                                                                        |
| SOX2   | SRY (sex determining region Y)-box 2                                                                             | This protein is required for stem-cell maintenance in the central nervous system, and also regulates gene expression in the stomach.                                                                                                                                                                                                   |
| SOX11  | SRY (sex determining region Y)-box 11                                                                            | The protein may function in the developing nervous system and play a role in tumorigenesis                                                                                                                                                                                                                                             |
| SPG7   | spastic paraplegia 7 (pure and complicated autosomal recessive)                                                  | Members of this protein family share an ATPase domain and have roles in diverse cellular processes including membrane trafficking, intracellular motility, organelle biogenesis, protein folding, and proteolysis.                                                                                                                     |
| TRIO   | triple functional domain (PTPRF interacting)                                                                     |                                                                                                                                                                                                                                                                                                                                        |
| TRPC5  | transient receptor potential cation channel, subfamily C, member 5                                               |                                                                                                                                                                                                                                                                                                                                        |

|                                                                                |         |                                                                     |                                                                                                                                                                                                                                                                                                                                                  |
|--------------------------------------------------------------------------------|---------|---------------------------------------------------------------------|--------------------------------------------------------------------------------------------------------------------------------------------------------------------------------------------------------------------------------------------------------------------------------------------------------------------------------------------------|
|                                                                                | TRPV1   | transient receptor potential cation channel, subfamily V, member 1  | The protein encoded by this gene is a receptor for capsaicin and is a non-selective cation channel that is structurally related to members of the TRP family of ion channels. This receptor is also activated by increases in temperature in the noxious range, suggesting that it functions as a transducer of painful thermal stimuli in vivo. |
|                                                                                | VSX1    | visual system homeobox 1                                            | The encoded protein may regulate expression of the cone opsin genes early in development.                                                                                                                                                                                                                                                        |
|                                                                                | WT1     | Wilms tumor 1                                                       | This protein has an essential role in the normal development of the urogenital system, and it is mutated in a small subset of patients with Wilm's tumors.                                                                                                                                                                                       |
|                                                                                | ZIC1    | Zic family member 1 (odd-paired homolog, Drosophila)                | This gene encodes a transcription factor that can bind and transactivate the apolipoprotein E gene.                                                                                                                                                                                                                                              |
|                                                                                | ZIC2    | Zic family member 2 (odd-paired homolog, Drosophila)                | This protein functions as a transcriptional repressor and may regulate tissue specific expression of dopamine receptor D1.                                                                                                                                                                                                                       |
| Nervous System Development and Function: Growth: Growth of Neurites (9.65E-04) | ACAN    | aggrecan                                                            | The encoded protein is an integral part of the extracellular matrix in cartilagenous tissue and it withstands compression in cartilage.                                                                                                                                                                                                          |
|                                                                                | ALS2    | amyotrophic lateral sclerosis 2 (juvenile)                          | The protein functions as a guanine nucleotide exchange factor for the small GTPase RAB5.                                                                                                                                                                                                                                                         |
|                                                                                | AR      | androgen receptor                                                   | This protein functions as a steroid-hormone activated transcription factor.                                                                                                                                                                                                                                                                      |
|                                                                                | ARHGAP5 | Rho GTPase activating protein 5                                     | This protein negatively regulates RHO GTPases, a family which may mediate cytoskeleton changes by stimulating the hydrolysis of bound GTP.                                                                                                                                                                                                       |
|                                                                                | BCL2    | B-cell CLL/lymphoma 2                                               | This gene encodes an integral outer mitochondrial membrane protein that blocks the apoptotic death of some cells such as lymphocytes.                                                                                                                                                                                                            |
|                                                                                | BMP7    | bone morphogenetic protein 7                                        | Based on its expression early in embryogenesis, the BMP encoded by this gene has a proposed role in early development and possible bone inductive activity.                                                                                                                                                                                      |
|                                                                                | CD47    | CD47 molecule                                                       | This protein, involved in the increase in intracellular calcium concentration that occurs upon cell adhesion to extracellular matrix, is also a receptor for the C-terminal cell binding domain of thrombospondin, and plays a role in membrane transport and signal transduction. Is has broad tissue distribution.                             |
|                                                                                | CDC2    | cell division cycle 2, G1 to S and G2 to M                          | This protein is a catalytic subunit of the highly conserved protein kinase complex known as M-phase promoting factor (MPF), which is essential for G1/S and G2/M phase transitions of eukaryotic cell cycle.                                                                                                                                     |
|                                                                                | CDK2    | cyclin-dependent kinase 2                                           | This protein is a catalytic subunit of the cyclin-dependent protein kinase complex, whose activity is restricted to the G1-S phase, and essential for cell cycle G1/S phase transition.                                                                                                                                                          |
|                                                                                | CHL1    | cell adhesion molecule with homology to L1CAM (close homolog of L1) | The protein encoded by this gene is a neural recognition molecule that may be involved in signal transduction pathways.                                                                                                                                                                                                                          |
|                                                                                | CNPY2   | canopy 2 homolog (zebrafish)                                        |                                                                                                                                                                                                                                                                                                                                                  |
|                                                                                | CNR1    | cannabinoid receptor 1 (brain)                                      | This gene encodes one of two cannabinoid receptors, which have been found to be involved in the cannabinoid-induced CNS effects (including alterations in mood and cognition) experienced by users of marijuana.                                                                                                                                 |
|                                                                                | CYP19A1 | cytochrome P450, family 19, subfamily A, polypeptide 1              | This protein localizes to the endoplasmic reticulum and catalyzes the last steps of estrogen biosynthesis, three successive hydroxylations of the A ring of androgens.                                                                                                                                                                           |

|        |                                                                            |                                                                                                                                                                                                                                                                                                                                                                     |
|--------|----------------------------------------------------------------------------|---------------------------------------------------------------------------------------------------------------------------------------------------------------------------------------------------------------------------------------------------------------------------------------------------------------------------------------------------------------------|
| DCC    | deleted in colorectal carcinoma                                            |                                                                                                                                                                                                                                                                                                                                                                     |
| DNER   | delta/notch-like EGF repeat containing                                     |                                                                                                                                                                                                                                                                                                                                                                     |
| DOCK1  | dedicator of cytokinesis 1                                                 | This gene product binds to the SH3 domain of CRK protein. It may regulate cell surface extension and may have a role in the cell surface extension of an engulfing cell around a dying cell during apoptosis.                                                                                                                                                       |
| DOK5   | docking protein 5                                                          | This protein interacts with phosphorylated receptor tyrosine kinases to mediate neurite outgrowth and activation of the MAP kinase pathway.                                                                                                                                                                                                                         |
| E2F1   | E2F transcription factor 1                                                 | The protein encoded by this gene is a member of the E2F family of transcription factors which plays a crucial role in the control of cell cycle and action of tumor suppressor proteins and is also a target of the transforming proteins of small DNA tumor viruses. It can mediate both cell proliferation and p53-dependent/independent apoptosis.               |
| EFNB3  | ephrin-B3                                                                  | EFNB3, a member of the ephrin gene family, is important in brain development as well as in its maintenance. It may play a pivotal role in forebrain function. The EPH and EPH-related receptors comprise the largest subfamily of receptor protein-tyrosine kinases and have been implicated in mediating developmental events, particularly in the nervous system. |
| ELAVL4 | ELAV (embryonic lethal, abnormal vision, Drosophila)-like 4 (Hu antigen D) |                                                                                                                                                                                                                                                                                                                                                                     |
| ELK1   | ELK1, member of ETS oncogene family                                        | This protein is a nuclear target for the ras-raf-MAPK signaling cascade.                                                                                                                                                                                                                                                                                            |
| EPN1   | epsin 1                                                                    | EPN1 is an endocytic accessory protein that interacts with EPS15 (MIM 600051), the alpha subunit of the clathrin adaptor AP2 (AP2A1; MIM 601026), and clathrin (see MIM 118960), as well as with other accessory proteins for the endocytosis of clathrin-coated vesicles.                                                                                          |
| ERBB4  | v-erb-a erythroblastic leukemia viral oncogene homolog 4 (avian)           | This gene encodes a protein which binds to and is activated by neuregulins and other factors and induces a variety of cellular responses including mitogenesis and differentiation.                                                                                                                                                                                 |
| FGF1   | fibroblast growth factor 1 (acidic)                                        | This protein functions as a modifier of endothelial cell migration and proliferation, as well as an angiogenic factor. It acts as a mitogen for a variety of mesoderm- and neuroectoderm-derived cells in vitro, thus is thought to be involved in organogenesis.                                                                                                   |
| FGF2   | fibroblast growth factor 2 (basic)                                         | The CUG-initiated isoforms of this gene are localized in the nucleus and are responsible for the intracrine effect, whereas, the AUG-initiated form is mostly cytosolic and is responsible for the paracrine and autocrine effects of this FGF.                                                                                                                     |
| FGF4   | fibroblast growth factor 4                                                 | This gene was identified by its oncogenic transforming activity. Studies on the mouse homolog suggested a function in bone morphogenesis and limb development through the sonic hedgehog (SHH) signaling pathway.                                                                                                                                                   |
| FGF5   | fibroblast growth factor 5                                                 | This gene was identified as an oncogene, which confers transforming potential when transfected into mammalian cells.                                                                                                                                                                                                                                                |
| FGF7   | fibroblast growth factor 7 (keratinocyte growth factor)                    | This protein is an epithelial cell-specific growth factor, whose mitogenic activity is exhibited in keratinocytes but not in fibroblasts and endothelial cells. It may also be implicated roles in morphogenesis of epithelium, reepithelialization of wounds, hair development and early lung organogenesis.                                                       |

|       |                                                                                              |                                                                                                                                                                                                                                                                                                                                                   |
|-------|----------------------------------------------------------------------------------------------|---------------------------------------------------------------------------------------------------------------------------------------------------------------------------------------------------------------------------------------------------------------------------------------------------------------------------------------------------|
| FGF18 | fibroblast growth factor 18                                                                  | This protein may be a pleiotropic growth factor that stimulates proliferation in many tissues, notably the liver and small intestine. Knockout studies in mice implied the its role in regulating proliferation and differentiation of midline cerebellar structures.                                                                             |
| FN1   | fibronectin 1                                                                                | Fibronectin is involved in cell adhesion and migration processes including embryogenesis, wound healing, blood coagulation, host defense, and metastasis.                                                                                                                                                                                         |
| GAB1  | GRB2-associated binding protein 1                                                            | The protein encoded by this gene is an important mediator of branching tubulogenesis and plays a central role in cellular growth response, transformation and apoptosis.                                                                                                                                                                          |
| GDNF  | glial cell derived neurotrophic factor                                                       | The recombinant form of this protein was shown to promote the survival and differentiation of dopaminergic neurons in culture, and was able to prevent apoptosis of motor neurons induced by axotomy.                                                                                                                                             |
| GNAO1 | guanine nucleotide binding protein (G protein), alpha activating activity polypeptide O      |                                                                                                                                                                                                                                                                                                                                                   |
| GNAS  | GNAS complex locus                                                                           | This protein is associated with the classical signal transduction pathway linking receptor-ligand interactions with the activation of adenylyl cyclase and a variety of cellular reponses.                                                                                                                                                        |
| GPR6  | G protein-coupled receptor 6                                                                 |                                                                                                                                                                                                                                                                                                                                                   |
| GPR12 | G protein-coupled receptor 12                                                                |                                                                                                                                                                                                                                                                                                                                                   |
| HGF   | hepatocyte growth factor (hepapoietin A; scatter factor)                                     | Hepatocyte growth factor regulates cell growth, cell motility, and morphogenesis by activating a tyrosine kinase signaling cascade after binding to the proto-oncogenic c-Met receptor. Its ability to stimulate mitogenesis, cell motility, and matrix invasion gives it a central role in angiogenesis, tumorogenesis, and tissue regeneration. |
| IGF1  | insulin-like growth factor 1 (somatomedin C)                                                 | The protein encoded by this gene is similar to insulin in function and structure and is a member of a family of proteins involved in mediating growth and development.                                                                                                                                                                            |
| ITGB1 | integrin, beta 1 (fibronectin receptor, beta polypeptide, antigen CD29 includes MDF2, MSK12) | Integrin family members are membrane receptors involved in cell adhesion and recognition in a variety of processes including embryogenesis, hemostasis, tissue repair, immune response and metastatic diffusion of tumor cells.                                                                                                                   |
| ITGB3 | integrin, beta 3 (platelet glycoprotein IIIa, antigen CD61)                                  | Integrins are known to participate in cell adhesion as well as cell-surface mediated signalling.                                                                                                                                                                                                                                                  |
| KIT   | v-kit Hardy-Zuckerman 4 feline sarcoma viral oncogene homolog                                | This gene encodes the human homolog of the proto-oncogene c-kit. This protein is a type 3 transmembrane receptor for MGF (mast cell growth factor, also known as stem cell factor).                                                                                                                                                               |
| KNDC1 | kinase non-catalytic C-lobe domain (KIND) containing 1                                       |                                                                                                                                                                                                                                                                                                                                                   |
| KRAS  | v-Ki-ras2 Kirsten rat sarcoma viral oncogene homolog                                         | This gene, a Kirsten ras oncogene, encodes a protein that is a member of the small GTPase superfamily. The transforming protein that results is implicated in various malignancies, including lung adenocarcinoma, mucinous adenoma, ductal carcinoma of the pancreas and colorectal carcinoma.                                                   |

|         |                                                          |                                                                                                                                                                                                                                                                                          |
|---------|----------------------------------------------------------|------------------------------------------------------------------------------------------------------------------------------------------------------------------------------------------------------------------------------------------------------------------------------------------|
| LAMA2   | laminin, alpha 2                                         | Laminin, an extracellular protein, is a major component of the basement membrane. It is thought to mediate the attachment, migration, and organization of cells into tissues during embryonic development by interacting with other extracellular matrix components.                     |
| LAMA3   | laminin, alpha 3                                         | The protein encoded by this gene is the alpha-3 subunit of laminin 5, which is thought to be involved in cell adhesion, signal transduction and differentiation of keratinocytes.                                                                                                        |
| LINGO1  | leucine rich repeat and Ig domain containing 1           |                                                                                                                                                                                                                                                                                          |
| MAPK11  | mitogen-activated protein kinase 11                      | This kinase can be activated by proinflammatory cytokines and environmental stress.                                                                                                                                                                                                      |
| MAPT    | microtubule-associated protein tau                       | MAPT transcripts are differentially expressed in the nervous system, depending on stage of neuronal maturation and neuron type.                                                                                                                                                          |
| MET     | met proto-oncogene (hepatocyte growth factor receptor)   | The proto-oncogene MET product is the hepatocyte growth factor receptor and encodes tyrosine-kinase activity.                                                                                                                                                                            |
| NCAM1   | neural cell adhesion molecule 1                          |                                                                                                                                                                                                                                                                                          |
| NF1     | neurofibromin 1                                          | This gene product appears to function as a negative regulator of the ras signal transduction pathway.                                                                                                                                                                                    |
| NRG1    | neuregulin 1                                             | This protein is a signaling protein that mediates cell-cell interactions and plays critical roles in the growth and development of multiple organ systems.                                                                                                                               |
| NRTN    | neurturin                                                | Neurturin is a member of the TGF-beta subfamily, TRN. This gene signals through RET and a GPI-linked coreceptor, and promotes survival of neuronal populations.                                                                                                                          |
| NTRK2   | neurotrophic tyrosine kinase, receptor, type 2           | This kinase is a membrane-bound receptor that, upon neurotrophin binding, phosphorylates itself and members of the MAPK pathway. Signalling through this kinase leads to cell differentiation.                                                                                           |
| NTRK3   | neurotrophic tyrosine kinase, receptor, type 3           | This kinase is a membrane-bound receptor that, upon neurotrophin binding, phosphorylates itself and members of the MAPK pathway. Signalling through this kinase leads to cell differentiation and may play a role in the development of proprioceptive neurons that sense body position. |
| PAK7    | p21 protein (Cdc42/Rac)-activated kinase 7               | This kinase is predominantly expressed in brain. It is capable of promoting neurite outgrowth, and thus may play a role in neurite development. This kinase is associated with microtubule networks and induces microtubule stabilization.                                               |
| PLA2G10 | phospholipase A2, group X                                |                                                                                                                                                                                                                                                                                          |
| PLXNA3  | plexin A3                                                |                                                                                                                                                                                                                                                                                          |
| PLXNA4  | plexin A4                                                |                                                                                                                                                                                                                                                                                          |
| POLR3E  | polymerase (RNA) III (DNA directed) polypeptide E (80kD) |                                                                                                                                                                                                                                                                                          |
| POU3F2  | POU class 3 homeobox 2                                   | Class III POU genes are expressed predominantly in the central nervous system (CNS). It is likely that CNS-specific transcription factors such as these play an important role in mammalian neurogenesis.                                                                                |
| POU4F1  | POU class 4 homeobox 1                                   | POU4F1 is a class IV POU domain-containing transcription factor highly expressed in the developing sensory nervous system and in cells of the B- and T-lymphocytic lineages.                                                                                                             |
| POU4F2  | POU class 4 homeobox 2                                   | POU4F2 is found in human retina exclusively within a subpopulation of ganglion cells where it may play a role in determining or maintaining the identities of a small subset of visual system neurons.                                                                                   |



|          |                                                                          |                                                                                                                                                                                                                                                                     |
|----------|--------------------------------------------------------------------------|---------------------------------------------------------------------------------------------------------------------------------------------------------------------------------------------------------------------------------------------------------------------|
| PPP2R2C  | protein phosphatase 2 (formerly 2A), regulatory subunit B, gamma isoform | Protein phosphatase 2 is one of the four major Ser/Thr phosphatases, and it is implicated in the negative control of cell growth and division                                                                                                                       |
| PTEN     | phosphatase and tensin homolog                                           | This protein preferentially dephosphorylates phosphoinositide substrates. It negatively regulates intracellular levels of phosphatidylinositol-3,4,5-trisphosphate in cells and functions as a tumor suppressor by negatively regulating AKT/PKB signaling pathway. |
| PTN      | pleiotrophin                                                             |                                                                                                                                                                                                                                                                     |
| RAP1GAP  | RAP1 GTPase activating protein                                           |                                                                                                                                                                                                                                                                     |
| RHOQ     | ras homolog gene family, member Q                                        | TC10 is a member of the RAS superfamily of small GTP-binding proteins (see HRAS, MIM 190020) involved in insulin-stimulated glucose uptake.                                                                                                                         |
| RIT2     | Ras-like without CAAX 2                                                  | RIN belongs to the RAS (HRAS; MIM 190020) superfamily of small GTPases.                                                                                                                                                                                             |
| SIP1     | survival of motor neuron protein interacting protein 1                   |                                                                                                                                                                                                                                                                     |
| TNFRSF19 | tumor necrosis factor receptor superfamily, member 19                    | This receptor is highly expressed during embryonic development. This receptor is capable of inducing apoptosis by a caspase-independent mechanism, and it is thought to play an essential role in embryonic development.                                            |
| TNK2     | tyrosine kinase, non-receptor, 2                                         | This protein may be involved in a regulatory mechanism that sustains the GTP-bound active form of Cdc42Hs and which is directly linked to a tyrosine phosphorylation signal transduction pathway.                                                                   |
| TPM3     | tropomyosin 3                                                            | This gene encodes a member of the tropomyosin family of actin-binding proteins involved in the contractile system of striated and smooth muscles and the cytoskeleton of non-muscle cells.                                                                          |
| TRIO     | triple functional domain (PTPRF interacting)                             |                                                                                                                                                                                                                                                                     |
| TRPC5    | transient receptor potential cation channel, subfamily C, member 5       |                                                                                                                                                                                                                                                                     |
| WT1      | Wilms tumor 1                                                            | This protein has an essential role in the normal development of the urogenital system, and it is mutated in a small subset of patients with Wilm's tumors.                                                                                                          |

---

Nervous System  
Development and  
Function: Quantity:  
Quantity of Neurons  
(1.34E-03)

|       |                                              |                                                                                                                                                                                                                                                                                                                                                                                                                                          |
|-------|----------------------------------------------|------------------------------------------------------------------------------------------------------------------------------------------------------------------------------------------------------------------------------------------------------------------------------------------------------------------------------------------------------------------------------------------------------------------------------------------|
| ARX   | aristaless related homeobox                  | This gene is a homeobox-containing gene expressed during development, and is thought to be involved in CNS development.                                                                                                                                                                                                                                                                                                                  |
| ASCL1 | achaete-scute complex homolog 1 (Drosophila) | The protein activates transcription by binding to the E box. This protein plays a role in the neuronal commitment and differentiation and in the generation of olfactory and autonomic neurons.                                                                                                                                                                                                                                          |
| ATM   | ataxia telangiectasia mutated                | This protein functions as a regulator of a wide variety of downstream proteins, including tumor suppressor proteins p53 and BRCA1, checkpoint kinase CHK2, checkpoint proteins RAD17 and RAD9, and DNA repair protein NBS1. This protein and the closely related kinase ATR are thought to be master controllers of cell cycle checkpoint signaling pathways that are required for cell response to DNA damage and for genome stability. |
| BCL2  | B-cell CLL/lymphoma 2                        | This gene encodes an integral outer mitochondrial membrane protein that blocks the apoptotic death of some cells such as lymphocytes.                                                                                                                                                                                                                                                                                                    |

|        |                                                                                         |                                                                                                                                                                                                                                                                                                                                                   |
|--------|-----------------------------------------------------------------------------------------|---------------------------------------------------------------------------------------------------------------------------------------------------------------------------------------------------------------------------------------------------------------------------------------------------------------------------------------------------|
| BMPR1B | bone morphogenetic protein receptor, type IB                                            | The ligands of this receptor are BMPs, which are members of the TGF-beta superfamily. BMPs are involved in endochondral bone formation and embryogenesis.                                                                                                                                                                                         |
| CDNF   | cerebral dopamine neurotrophic factor                                                   |                                                                                                                                                                                                                                                                                                                                                   |
| CHRN2  | cholinergic receptor, nicotinic, beta 2 (neuronal)                                      | The protein encoded by this gene belongs to a superfamily of ligand-gated ion channels which allow the flow of sodium and potassium across the plasma membrane in response to ligands such as acetylcholine and nicotine.                                                                                                                         |
| DCC    | deleted in colorectal carcinoma                                                         |                                                                                                                                                                                                                                                                                                                                                   |
| DCLK1  | doublecortin-like kinase 1                                                              | DCAMKL1 is a microtubule-associated protein that phosphorylates itself and myelin basic protein (MBP; MIM 159430).                                                                                                                                                                                                                                |
| DLX1   | distal-less homeobox 1                                                                  | This protein may function as a transcriptional regulator of signals from multiple TGF- $\beta$ superfamily members. It may play a role in the control of craniofacial patterning and the differentiation and survival of inhibitory neurons in the forebrain.                                                                                     |
| ERBB4  | v-erb-a erythroblastic leukemia viral oncogene homolog 4 (avian)                        | This gene encodes a protein which binds to and is activated by neuregulins and other factors and induces a variety of cellular responses including mitogenesis and differentiation.                                                                                                                                                               |
| ESR1   | estrogen receptor 1                                                                     | This gene encodes an estrogen receptor which are essential for sexual development and reproductive function, but also play a role in other tissues such as bone.                                                                                                                                                                                  |
| FGF2   | fibroblast growth factor 2 (basic)                                                      | The CUG-initiated isoforms of this gene are localized in the nucleus and are responsible for the intracrine effect, whereas, the AUG-initiated form is mostly cytosolic and is responsible for the paracrine and autocrine effects of this FGF.                                                                                                   |
| FGF13  | fibroblast growth factor 13                                                             | This gene is a possible candidate gene for familial cases of the BFLS, and for other syndromal and nonspecific forms of X-linked mental retardation, due to its chromosomal location.                                                                                                                                                             |
| GCG    | glucagon                                                                                | Glucagon, is a pancreatic hormone that counteracts the glucose-lowering action of insulin by stimulating glycogenolysis and gluconeogenesis.                                                                                                                                                                                                      |
| GDNF   | glial cell derived neurotrophic factor                                                  | The recombinant form of this protein was shown to promote the survival and differentiation of dopaminergic neurons in culture, and was able to prevent apoptosis of motor neurons induced by axotomy.                                                                                                                                             |
| GNAO1  | guanine nucleotide binding protein (G protein), alpha activating activity polypeptide O |                                                                                                                                                                                                                                                                                                                                                   |
| HES1   | hairy and enhancer of split 1, (Drosophila)                                             | It is a transcriptional repressor of genes that require a bHLH protein for their transcription. The protein has a particular type of basic domain that contains a helix interrupting protein that binds to the N-box rather than the canonical E-box.                                                                                             |
| HGF    | hepatocyte growth factor (hepapoietin A; scatter factor)                                | Hepatocyte growth factor regulates cell growth, cell motility, and morphogenesis by activating a tyrosine kinase signaling cascade after binding to the proto-oncogenic c-Met receptor. Its ability to stimulate mitogenesis, cell motility, and matrix invasion gives it a central role in angiogenesis, tumorigenesis, and tissue regeneration. |
| HIPK2  | homeodomain interacting protein kinase 2                                                | HIPK2 is a conserved serine/threonine nuclear kinase that interacts with homeodomain transcription factors.                                                                                                                                                                                                                                       |

|         |                                                |                                                                                                                                                                                                                                                                                                                                                                                                                       |
|---------|------------------------------------------------|-----------------------------------------------------------------------------------------------------------------------------------------------------------------------------------------------------------------------------------------------------------------------------------------------------------------------------------------------------------------------------------------------------------------------|
| IGF1    | insulin-like growth factor 1 (somatomedin C)   | The protein encoded by this gene is similar to insulin in function and structure and is a member of a family of proteins involved in mediating growth and development.                                                                                                                                                                                                                                                |
| JAG2    | jagged 2                                       | Members of the Notch gene family encode transmembrane receptors that are critical for various cell fate decisions. The protein encoded by this gene is one of several ligands that activate Notch and related receptors.                                                                                                                                                                                              |
| KCNIP3  | Kv channel interacting protein 3, calsenilin   | This gene encodes a member of the family of voltage-gated potassium (Kv) channel-interacting proteins. They are integral subunit components of native Kv4 channel complexes that may regulate A-type currents, and hence neuronal excitability, in response to changes in intracellular calcium. The encoded protein also functions as a calcium-regulated transcriptional repressor, and interacts with presenilins. |
| KIF5C   | kinesin family member 5C                       |                                                                                                                                                                                                                                                                                                                                                                                                                       |
| LEF1    | lymphoid enhancer-binding factor 1             | LEF1 is a nuclear protein that is expressed in pre-B and T cells. It binds to a functionally important site in the T-cell receptor-alpha (TCRA; MIM 186880) enhancer and confers maximal enhancer activity.                                                                                                                                                                                                           |
| LHX8    | LIM homeobox 8                                 | Members of the LIM homeobox gene family, such as LHX8, encode transcription regulators that share common structural features. Members of the LIM homeobox gene family are required for the patterning or the specification and differentiation of different cell types during embryonic development.                                                                                                                  |
| MAPT    | microtubule-associated protein tau             | MAPT transcripts are differentially expressed in the nervous system, depending on stage of neuronal maturation and neuron type.                                                                                                                                                                                                                                                                                       |
| MUSK    | muscle, skeletal, receptor tyrosine kinase     | This kinase activity is regulated by the binding of a cognate ligand to the extracellular portion of the receptor. DeChiara et al. (1996) [PubMed 8653786] noted that the RTKs, known to be expressed in cell type-specific fashions, play a role critical for the growth and differentiation of those cell types.                                                                                                    |
| NEFL    | neurofilament, light polypeptide               | Neurofilaments are type IV intermediate filament heteropolymers composed of light, medium, and heavy chains. Neurofilaments comprise the axoskeleton and they functionally maintain the neuronal caliber. They may also play a role in intracellular transport to axons and dendrites. This gene encodes the light chain neurofilament protein.                                                                       |
| NEUROD2 | neurogenic differentiation 2                   | Expression of this gene can induce transcription from neuron-specific promoters, such as the GAP-43 promoter, which contain a specific DNA sequence known as an E-box. The product of this gene is thought to play a role in the determination and maintenance of neuronal cell fates.                                                                                                                                |
| NHLH2   | nescient helix loop helix 2                    |                                                                                                                                                                                                                                                                                                                                                                                                                       |
| NKX2-1  | NK2 homeobox 1                                 |                                                                                                                                                                                                                                                                                                                                                                                                                       |
| NOG     | noggin                                         | This protein may have a principal role in creating morphogenic gradients, and in numerous developmental processes, such as neural tube fusion and joint formation.                                                                                                                                                                                                                                                    |
| NRP2    | neuropilin 2                                   | The encoded transmembrane protein binds to SEMA3C protein and SEMA3F protein, and interacts with vascular endothelial growth factor (VEGF). This protein may play a role in cardiovascular development, axon guidance, and tumorigenesis.                                                                                                                                                                             |
| NRTN    | neurturin                                      | Neurturin is a member of the TGF-beta subfamily, TRN. This gene signals through RET and a GPI-linked coreceptor, and promotes survival of neuronal populations.                                                                                                                                                                                                                                                       |
| NTRK2   | neurotrophic tyrosine kinase, receptor, type 2 | This kinase is a membrane-bound receptor that, upon neurotrophin binding, phosphorylates itself and members of the MAPK pathway. Signalling through this kinase leads to cell differentiation.                                                                                                                                                                                                                        |
| NTRK3   | neurotrophic tyrosine kinase, receptor, type 3 | This kinase is a membrane-bound receptor that, upon neurotrophin binding, phosphorylates itself and members of the MAPK pathway. Signalling through this kinase leads to cell differentiation and may play a role in the development of proprioceptive neurons that sense body position.                                                                                                                              |

|        |                                                             |                                                                                                                                                                                                                                                                                                            |
|--------|-------------------------------------------------------------|------------------------------------------------------------------------------------------------------------------------------------------------------------------------------------------------------------------------------------------------------------------------------------------------------------|
| PARK2  | Parkinson disease (autosomal recessive, juvenile) 2, parkin | The encoded protein is a component of a multiprotein E3 ubiquitin ligase complex that mediates the targeting of substrate proteins for proteasomal degradation.                                                                                                                                            |
| POU4F1 | POU class 4 homeobox 1                                      | POU4F1 is a class IV POU domain-containing transcription factor highly expressed in the developing sensory nervous system and in cells of the B- and T-lymphocytic lineages.                                                                                                                               |
| POU4F2 | POU class 4 homeobox 2                                      | POU4F2 is found in human retina exclusively within a subpopulation of ganglion cells where it may play a role in determining or maintaining the identities of a small subset of visual system neurons.                                                                                                     |
| RBL1   | retinoblastoma-like 1 (p107)                                | It is thought that, given the homology to the known tumor suppressor RB1, the protein encoded by this gene may also be a tumor suppressor.                                                                                                                                                                 |
| SIM1   | single-minded homolog 1 (Drosophila)                        | SIM1 transcript was detected only in fetal kidney out of various adult and fetal tissues tested, and it is a candidate for involvement in certain dysmorphic features (particularly the facial and skull characteristics), abnormalities of brain development, and/or mental retardation of Down syndrome. |
| TH     | tyrosine hydroxylase                                        | The protein encoded by this gene is involved in the conversion of tyrosine to dopamine. It is the rate-limiting enzyme in the synthesis of catecholamines, hence plays a key role in the physiology of adrenergic neurons.                                                                                 |

Nervous System  
Development and  
Function: Quantity:  
Quantity of Trigeminal  
Ganglion Neurons (9.23E-  
03)

|        |                                        |                                                                                                                                                                                                       |
|--------|----------------------------------------|-------------------------------------------------------------------------------------------------------------------------------------------------------------------------------------------------------|
| BCL2   | B-cell CLL/lymphoma 2                  | This gene encodes an integral outer mitochondrial membrane protein that blocks the apoptotic death of some cells such as lymphocytes.                                                                 |
| GDNF   | glial cell derived neurotrophic factor | The recombinant form of this protein was shown to promote the survival and differentiation of dopaminergic neurons in culture, and was able to prevent apoptosis of motor neurons induced by axotomy. |
| NOG    | noggin                                 | This protein may have a principal role in creating morphogenic gradients, and in numerous developmental processes, such as neural tube fusion and joint formation.                                    |
| POU4F1 | POU class 4 homeobox 1                 | POU4F1 is a class IV POU domain-containing transcription factor highly expressed in the developing sensory nervous system and in cells of the B- and T-lymphocytic lineages.                          |

Nervous System  
Development and  
Function: Migration:  
Migration of Schwann  
Cells (1.40E-03)

|       |                                                                                              |                                                                                                                                                                                                                                 |
|-------|----------------------------------------------------------------------------------------------|---------------------------------------------------------------------------------------------------------------------------------------------------------------------------------------------------------------------------------|
| CSPG4 | chondroitin sulfate proteoglycan 4                                                           | A human melanoma-associated chondroitin sulfate proteoglycan plays a role in stabilizing cell-substratum interactions during early events of melanoma cell spreading on endothelial basement membranes.                         |
| FN1   | fibronectin 1                                                                                | Fibronectin is involved in cell adhesion and migration processes including embryogenesis, wound healing, blood coagulation, host defense, and metastasis.                                                                       |
| GDNF  | glial cell derived neurotrophic factor                                                       | The recombinant form of this protein was shown to promote the survival and differentiation of dopaminergic neurons in culture, and was able to prevent apoptosis of motor neurons induced by axotomy.                           |
| ITGB1 | integrin, beta 1 (fibronectin receptor, beta polypeptide, antigen CD29 includes MDF2, MSK12) | Integrin family members are membrane receptors involved in cell adhesion and recognition in a variety of processes including embryogenesis, hemostasis, tissue repair, immune response and metastatic diffusion of tumor cells. |

|       |                                 |                                                                                                                                                                                                                                                                      |
|-------|---------------------------------|----------------------------------------------------------------------------------------------------------------------------------------------------------------------------------------------------------------------------------------------------------------------|
| LAMA2 | laminin, alpha 2                | Laminin, an extracellular protein, is a major component of the basement membrane. It is thought to mediate the attachment, migration, and organization of cells into tissues during embryonic development by interacting with other extracellular matrix components. |
| NCAM1 | neural cell adhesion molecule 1 |                                                                                                                                                                                                                                                                      |
| NF1   | neurofibromin 1                 | This gene product appears to function as a negative regulator of the ras signal transduction pathway.                                                                                                                                                                |
| NRG1  | neuregulin 1                    | This protein is a signaling protein that mediates cell-cell interactions and plays critical roles in the growth and development of multiple organ systems.                                                                                                           |

---

#### Nervous System

Development and Function: Migration: Migration of Neurons (1.11E-02)

|       |                                                                     |                                                                                                                                                                                                                                                                         |
|-------|---------------------------------------------------------------------|-------------------------------------------------------------------------------------------------------------------------------------------------------------------------------------------------------------------------------------------------------------------------|
| ARX   | aristaless related homeobox                                         | This gene is a homeobox-containing gene expressed during development, and is thought to be involved in CNS development.                                                                                                                                                 |
| ASCL1 | achaete-scute complex homolog 1 (Drosophila)                        | The protein activates transcription by binding to the E box. This protein plays a role in the neuronal commitment and differentiation and in the generation of olfactory and autonomic neurons.                                                                         |
| CCKAR | cholecystokinin A receptor                                          | This receptor is a major physiologic mediator of pancreatic enzyme secretion and smooth muscle contraction of the gallbladder and stomach. In the central and peripheral nervous system this receptor regulates satiety and the release of beta-endorphin and dopamine. |
| CHL1  | cell adhesion molecule with homology to L1CAM (close homolog of L1) | The protein encoded by this gene is a neural recognition molecule that may be involved in signal transduction pathways.                                                                                                                                                 |
| DCC   | deleted in colorectal carcinoma                                     |                                                                                                                                                                                                                                                                         |
| DCLK1 | doublecortin-like kinase 1                                          | DCAMKL1 is a microtubule-associated protein that phosphorylates itself and myelin basic protein (MBP; MIM 159430).                                                                                                                                                      |
| DLX1  | distal-less homeobox 1                                              | This protein may function as a transcriptional regulator of signals from multiple TGF- $\beta$ superfamily members. It may play a role in the control of craniofacial patterning and the differentiation and survival of inhibitory neurons in the forebrain.           |
| EBF1  | early B-cell factor 1                                               |                                                                                                                                                                                                                                                                         |
| EBF2  | early B-cell factor 2                                               | EBF2 belongs to the conserved Olf/EBF family (see MIM 164343) of helix-loop-helix transcription factors.                                                                                                                                                                |
| EDNRB | endothelin receptor type B                                          | The protein encoded by this gene is a G protein-coupled receptor which activates a phosphatidylinositol-calcium second messenger system.                                                                                                                                |
| FGF2  | fibroblast growth factor 2 (basic)                                  | The CUG-initiated isoforms of this gene are localized in the nucleus and are responsible for the intracrine effect, whereas, the AUG-initiated form is mostly cytosolic and is responsible for the paracrine and autocrine effects of this FGF.                         |
| FN1   | fibronectin 1                                                       | Fibronectin is involved in cell adhesion and migration processes including embryogenesis, wound healing, blood coagulation, host defense, and metastasis.                                                                                                               |
| GAD1  | glutamate decarboxylase 1 (brain, 67kDa)                            | The enzyme encoded is responsible for catalyzing the production of gamma-aminobutyric acid from L-glutamic acid.                                                                                                                                                        |
| GDNF  | glial cell derived neurotrophic factor                              | The recombinant form of this protein was shown to promote the survival and differentiation of dopaminergic neurons in culture, and was able to prevent apoptosis of motor neurons induced by axotomy.                                                                   |

|        |                                                                                              |                                                                                                                                                                                                                                                                                                                                                   |
|--------|----------------------------------------------------------------------------------------------|---------------------------------------------------------------------------------------------------------------------------------------------------------------------------------------------------------------------------------------------------------------------------------------------------------------------------------------------------|
| GLI3   | GLI family zinc finger 3                                                                     | The protein encoded by this gene localizes in the cytoplasm, activates patched Drosophila homolog (PTCH) gene expression and plays a role during embryogenesis.                                                                                                                                                                                   |
| HGF    | hepatocyte growth factor (hepapoietin A; scatter factor)                                     | Hepatocyte growth factor regulates cell growth, cell motility, and morphogenesis by activating a tyrosine kinase signaling cascade after binding to the proto-oncogenic c-Met receptor. Its ability to stimulate mitogenesis, cell motility, and matrix invasion gives it a central role in angiogenesis, tumorigenesis, and tissue regeneration. |
| HOXB2  | homeobox B2                                                                                  | The encoded protein functions as a sequence-specific transcription factor that is involved in development.                                                                                                                                                                                                                                        |
| ITGB1  | integrin, beta 1 (fibronectin receptor, beta polypeptide, antigen CD29 includes MDF2, MSK12) | Integrin family members are membrane receptors involved in cell adhesion and recognition in a variety of processes including embryogenesis, hemostasis, tissue repair, immune response and metastatic diffusion of tumor cells.                                                                                                                   |
| LAMA2  | laminin, alpha 2                                                                             | Laminin, an extracellular protein, is a major component of the basement membrane. It is thought to mediate the attachment, migration, and organization of cells into tissues during embryonic development by interacting with other extracellular matrix components.                                                                              |
| MAPT   | microtubule-associated protein tau                                                           | MAPT transcripts are differentially expressed in the nervous system, depending on stage of neuronal maturation and neuron type.                                                                                                                                                                                                                   |
| MET    | met proto-oncogene (hepatocyte growth factor receptor)                                       | The proto-oncogene MET product is the hepatocyte growth factor receptor and encodes tyrosine-kinase activity.                                                                                                                                                                                                                                     |
| MNX1   | motor neuron and pancreas homeobox 1                                                         |                                                                                                                                                                                                                                                                                                                                                   |
| NAV1   | neuron navigator 1                                                                           | This gene is similar to unc-53, a Caenorhabditis elegans gene involved in axon guidance. The exact function of this gene is not known.                                                                                                                                                                                                            |
| NFIX   | nuclear factor I/X (CCAAT-binding transcription factor)                                      |                                                                                                                                                                                                                                                                                                                                                   |
| NKX2-1 | NK2 homeobox 1                                                                               |                                                                                                                                                                                                                                                                                                                                                   |
| NR2F2  | nuclear receptor subfamily 2, group F, member 2                                              |                                                                                                                                                                                                                                                                                                                                                   |
| PEX13  | peroxisomal biogenesis factor 13                                                             | This gene encodes a peroxisomal membrane protein that binds the type 1 peroxisomal targeting signal receptor via a SH3 domain located in the cytoplasm.                                                                                                                                                                                           |
| POU3F2 | POU class 3 homeobox 2                                                                       | Class III POU genes are expressed predominantly in the central nervous system (CNS). It is likely that CNS-specific transcription factors such as these play an important role in mammalian neurogenesis.                                                                                                                                         |
| POU4F1 | POU class 4 homeobox 1                                                                       | POU4F1 is a class IV POU domain-containing transcription factor highly expressed in the developing sensory nervous system and in cells of the B- and T-lymphocytic lineages.                                                                                                                                                                      |
| PRKG1  | protein kinase, cGMP-dependent, type I                                                       |                                                                                                                                                                                                                                                                                                                                                   |
| PTEN   | phosphatase and tensin homolog                                                               | This protein preferentially dephosphorylates phosphoinositide substrates. It negatively regulates intracellular levels of phosphatidylinositol-3,4,5-trisphosphate in cells and functions as a tumor suppressor by negatively regulating AKT/PKB signaling pathway.                                                                               |

|        |                                                                               |                                                                                                                                                                                                                                                                                                                                        |
|--------|-------------------------------------------------------------------------------|----------------------------------------------------------------------------------------------------------------------------------------------------------------------------------------------------------------------------------------------------------------------------------------------------------------------------------------|
| PTK2   | PTK2 protein tyrosine kinase 2                                                | Activation of this gene may be an important early step in cell growth and intracellular signal transduction pathways triggered in response to certain neural peptides or to cell interactions with the extracellular matrix.                                                                                                           |
| PTN    | pleiotrophin                                                                  |                                                                                                                                                                                                                                                                                                                                        |
| PXMP3  | peroxisomal membrane protein 3, 35kDa                                         | This integral peroxisomal membrane protein is required for peroxisome biogenesis, and is thought to be involved in peroxisomal matrix protein import.                                                                                                                                                                                  |
| RGS3   | regulator of G-protein signaling 3                                            | This protein is a GTP-ase activating protein which inhibits G-protein mediated signal transduction..                                                                                                                                                                                                                                   |
| SLC1A2 | solute carrier family 1 (glial high affinity glutamate transporter), member 2 | The membrane-bound protein is the principal transporter that clears the excitatory neurotransmitter glutamate from the extracellular space at synapses in the central nervous system. Glutamate clearance is necessary for proper synaptic activation and to prevent neuronal damage from excessive activation of glutamate receptors. |
| SOX1   | SRY (sex determining region Y)-box 1                                          | This protein is involved in the regulation of embryonic development and in the determination of the cell fate, and may be essential for lens development.                                                                                                                                                                              |

Nervous System  
Development and  
Function: Outgrowth:  
Outgrowth of Neurites  
(1.82E-03)

|         |                                                                     |                                                                                                                                                                                                                                                                                                                      |
|---------|---------------------------------------------------------------------|----------------------------------------------------------------------------------------------------------------------------------------------------------------------------------------------------------------------------------------------------------------------------------------------------------------------|
| ALS2    | amyotrophic lateral sclerosis 2 (juvenile)                          | The protein functions as a guanine nucleotide exchange factor for the small GTPase RAB5.                                                                                                                                                                                                                             |
| AR      | androgen receptor                                                   | This protein functions as a steroid-hormone activated transcription factor.                                                                                                                                                                                                                                          |
| ARHGAP5 | Rho GTPase activating protein 5                                     | This protein negatively regulates RHO GTPases, a family which may mediate cytoskeleton changes by stimulating the hydrolysis of bound GTP.                                                                                                                                                                           |
| BCL2    | B-cell CLL/lymphoma 2                                               | This gene encodes an integral outer mitochondrial membrane protein that blocks the apoptotic death of some cells such as lymphocytes.                                                                                                                                                                                |
| CD47    | CD47 molecule                                                       | This protein, involved in the increase in intracellular calcium concentration that occurs upon cell adhesion to extracellular matrix, is also a receptor for the C-terminal cell binding domain of thrombospondin, and plays a role in membrane transport and signal transduction. It has broad tissue distribution. |
| CDC2    | cell division cycle 2, G1 to S and G2 to M                          | This protein is a catalytic subunit of the highly conserved protein kinase complex known as M-phase promoting factor (MPF), which is essential for G1/S and G2/M phase transitions of eukaryotic cell cycle.                                                                                                         |
| CDK2    | cyclin-dependent kinase 2                                           | This protein is a catalytic subunit of the cyclin-dependent protein kinase complex, whose activity is restricted to the G1-S phase, and essential for cell cycle G1/S phase transition.                                                                                                                              |
| CHL1    | cell adhesion molecule with homology to L1CAM (close homolog of L1) | The protein encoded by this gene is a neural recognition molecule that may be involved in signal transduction pathways.                                                                                                                                                                                              |
| CNPY2   | canopy 2 homolog (zebrafish)                                        |                                                                                                                                                                                                                                                                                                                      |
| CNR1    | cannabinoid receptor 1 (brain)                                      | This gene encodes one of two cannabinoid receptors, which have been found to be involved in the cannabinoid-induced CNS effects (including alterations in mood and cognition) experienced by users of marijuana.                                                                                                     |
| DCC     | deleted in colorectal carcinoma                                     |                                                                                                                                                                                                                                                                                                                      |

|        |                                                                            |                                                                                                                                                                                                                                                                                                                                                                     |
|--------|----------------------------------------------------------------------------|---------------------------------------------------------------------------------------------------------------------------------------------------------------------------------------------------------------------------------------------------------------------------------------------------------------------------------------------------------------------|
| DNER   | delta/notch-like EGF repeat containing                                     |                                                                                                                                                                                                                                                                                                                                                                     |
| DOCK1  | dedicator of cytokinesis 1                                                 | This gene product binds to the SH3 domain of CRK protein. It may regulate cell surface extension and may have a role in the cell surface extension of an engulfing cell around a dying cell during apoptosis.                                                                                                                                                       |
| DOK5   | docking protein 5                                                          | This protein interacts with phosphorylated receptor tyrosine kinases to mediate neurite outgrowth and activation of the MAP kinase pathway.                                                                                                                                                                                                                         |
| E2F1   | E2F transcription factor 1                                                 | The protein encoded by this gene is a member of the E2F family of transcription factors which plays a crucial role in the control of cell cycle and action of tumor suppressor proteins and is also a target of the transforming proteins of small DNA tumor viruses. It can mediate both cell proliferation and p53-dependent/independent apoptosis.               |
| EFNB3  | ephrin-B3                                                                  | EFNB3, a member of the ephrin gene family, is important in brain development as well as in its maintenance. It may play a pivotal role in forebrain function. The EPH and EPH-related receptors comprise the largest subfamily of receptor protein-tyrosine kinases and have been implicated in mediating developmental events, particularly in the nervous system. |
| ELAVL4 | ELAV (embryonic lethal, abnormal vision, Drosophila)-like 4 (Hu antigen D) |                                                                                                                                                                                                                                                                                                                                                                     |
| ELK1   | ELK1, member of ETS oncogene family                                        | This protein is a nuclear target for the ras-raf-MAPK signaling cascade.                                                                                                                                                                                                                                                                                            |
| EPN1   | epsin 1                                                                    | EPN1 is an endocytic accessory protein that interacts with EPS15 (MIM 600051), the alpha subunit of the clathrin adaptor AP2 (AP2A1; MIM 601026), and clathrin (see MIM 118960), as well as with other accessory proteins for the endocytosis of clathrin-coated vesicles.                                                                                          |
| ERBB4  | v-erb-a erythroblastic leukemia viral oncogene homolog 4 (avian)           | This gene encodes a protein which binds to and is activated by neuregulins and other factors and induces a variety of cellular responses including mitogenesis and differentiation.                                                                                                                                                                                 |
| FGF1   | fibroblast growth factor 1 (acidic)                                        | This protein functions as a modifier of endothelial cell migration and proliferation, as well as an angiogenic factor. It acts as a mitogen for a variety of mesoderm- and neuroectoderm-derived cells in vitro, thus is thought to be involved in organogenesis.                                                                                                   |
| FGF2   | fibroblast growth factor 2 (basic)                                         | The CUG-initiated isoforms of this gene are localized in the nucleus and are responsible for the intracrine effect, whereas, the AUG-initiated form is mostly cytosolic and is responsible for the paracrine and autocrine effects of this FGF.                                                                                                                     |
| FGF4   | fibroblast growth factor 4                                                 | This gene was identified by its oncogenic transforming activity. Studies on the mouse homolog suggested a function in bone morphogenesis and limb development through the sonic hedgehog (SHH) signaling pathway.                                                                                                                                                   |
| FGF5   | fibroblast growth factor 5                                                 | This gene was identified as an oncogene, which confers transforming potential when transfected into mammalian cells.                                                                                                                                                                                                                                                |
| FGF7   | fibroblast growth factor 7 (keratinocyte growth factor)                    | This protein is an epithelial cell-specific growth factor, whose mitogenic activity is exhibited in keratinocytes but not in fibroblasts and endothelial cells. It may also be implicated roles in morphogenesis of epithelium, reepithelialization of wounds, hair development and early lung organogenesis.                                                       |
| FGF18  | fibroblast growth factor 18                                                | This protein may be a pleiotropic growth factor that stimulates proliferation in many tissues, notably the liver and small intestine. Knockout studies in mice implied the its role in regulating proliferation and differentiation of midline cerebellar structures.                                                                                               |



|       |                                                                                              |                                                                                                                                                                                                                                                                                                                                                   |
|-------|----------------------------------------------------------------------------------------------|---------------------------------------------------------------------------------------------------------------------------------------------------------------------------------------------------------------------------------------------------------------------------------------------------------------------------------------------------|
| FN1   | fibronectin 1                                                                                | Fibronectin is involved in cell adhesion and migration processes including embryogenesis, wound healing, blood coagulation, host defense, and metastasis.                                                                                                                                                                                         |
| GAB1  | GRB2-associated binding protein 1                                                            | The protein encoded by this gene is an important mediator of branching tubulogenesis and plays a central role in cellular growth response, transformation and apoptosis.                                                                                                                                                                          |
| GDNF  | glial cell derived neurotrophic factor                                                       | The recombinant form of this protein was shown to promote the survival and differentiation of dopaminergic neurons in culture, and was able to prevent apoptosis of motor neurons induced by axotomy.                                                                                                                                             |
| GNAO1 | guanine nucleotide binding protein (G protein), alpha activating activity polypeptide O      |                                                                                                                                                                                                                                                                                                                                                   |
| GNAS  | GNAS complex locus                                                                           | This protein is associated with the classical signal transduction pathway linking receptor-ligand interactions with the activation of adenylyl cyclase and a variety of cellular responses.                                                                                                                                                       |
| GPR6  | G protein-coupled receptor 6                                                                 |                                                                                                                                                                                                                                                                                                                                                   |
| GPR12 | G protein-coupled receptor 12                                                                |                                                                                                                                                                                                                                                                                                                                                   |
| HGF   | hepatocyte growth factor (hepatopoietin A; scatter factor)                                   | Hepatocyte growth factor regulates cell growth, cell motility, and morphogenesis by activating a tyrosine kinase signaling cascade after binding to the proto-oncogenic c-Met receptor. Its ability to stimulate mitogenesis, cell motility, and matrix invasion gives it a central role in angiogenesis, tumorigenesis, and tissue regeneration. |
| IGF1  | insulin-like growth factor 1 (somatomedin C)                                                 | The protein encoded by this gene is similar to insulin in function and structure and is a member of a family of proteins involved in mediating growth and development.                                                                                                                                                                            |
| ITGB1 | integrin, beta 1 (fibronectin receptor, beta polypeptide, antigen CD29 includes MDF2, MSK12) | Integrin family members are membrane receptors involved in cell adhesion and recognition in a variety of processes including embryogenesis, hemostasis, tissue repair, immune response and metastatic diffusion of tumor cells.                                                                                                                   |
| ITGB3 | integrin, beta 3 (platelet glycoprotein IIIa, antigen CD61)                                  | Integrins are known to participate in cell adhesion as well as cell-surface mediated signalling.                                                                                                                                                                                                                                                  |
| KIT   | v-kit Hardy-Zuckerman 4 feline sarcoma viral oncogene homolog                                | This gene encodes the human homolog of the proto-oncogene c-kit. This protein is a type 3 transmembrane receptor for MGF (mast cell growth factor, also known as stem cell factor).                                                                                                                                                               |
| KRAS  | v-Ki-ras2 Kirsten rat sarcoma viral oncogene homolog                                         | This gene, a Kirsten ras oncogene, encodes a protein that is a member of the small GTPase superfamily. The transforming protein that results is implicated in various malignancies, including lung adenocarcinoma, mucinous adenoma, ductal carcinoma of the pancreas and colorectal carcinoma.                                                   |
| LAMA2 | laminin, alpha 2                                                                             | Laminin, an extracellular protein, is a major component of the basement membrane. It is thought to mediate the attachment, migration, and organization of cells into tissues during embryonic development by interacting with other extracellular matrix components.                                                                              |
| LAMA3 | laminin, alpha 3                                                                             | The protein encoded by this gene is the alpha-3 subunit of laminin 5, which is thought to be involved in cell adhesion, signal transduction and differentiation of keratinocytes.                                                                                                                                                                 |

|                             |                                                                          |                                                                                                                                                                                                                                                                                          |
|-----------------------------|--------------------------------------------------------------------------|------------------------------------------------------------------------------------------------------------------------------------------------------------------------------------------------------------------------------------------------------------------------------------------|
| MAPK11                      | mitogen-activated protein kinase 11                                      | This kinase can be activated by proinflammatory cytokines and environmental stress.                                                                                                                                                                                                      |
| MAPT                        | microtubule-associated protein tau                                       | MAPT transcripts are differentially expressed in the nervous system, depending on stage of neuronal maturation and neuron type.                                                                                                                                                          |
| MET                         | met proto-oncogene (hepatocyte growth factor receptor)                   | The proto-oncogene MET product is the hepatocyte growth factor receptor and encodes tyrosine-kinase activity.                                                                                                                                                                            |
| NCAM1                       | neural cell adhesion molecule 1                                          |                                                                                                                                                                                                                                                                                          |
| NF1                         | neurofibromin 1                                                          | This gene product appears to function as a negative regulator of the ras signal transduction pathway.                                                                                                                                                                                    |
| NRTN                        | neurturin                                                                | Neurturin is a member of the TGF-beta subfamily, TRN. This gene signals through RET and a GPI-linked coreceptor, and promotes survival of neuronal populations.                                                                                                                          |
| NTRK2                       | neurotrophic tyrosine kinase, receptor, type 2                           | This kinase is a membrane-bound receptor that, upon neurotrophin binding, phosphorylates itself and members of the MAPK pathway. Signalling through this kinase leads to cell differentiation.                                                                                           |
| NTRK3                       | neurotrophic tyrosine kinase, receptor, type 3                           | This kinase is a membrane-bound receptor that, upon neurotrophin binding, phosphorylates itself and members of the MAPK pathway. Signalling through this kinase leads to cell differentiation and may play a role in the development of proprioceptive neurons that sense body position. |
| PAK7                        | p21 protein (Cdc42/Rac)-activated kinase 7                               | This kinase is predominantly expressed in brain. It is capable of promoting neurite outgrowth, and thus may play a role in neurite development. This kinase is associated with microtubule networks and induces microtubule stabilization.                                               |
| PLA2G10<br>PLXNA3<br>PLXNA4 | phospholipase A2, group X<br>plexin A3<br>plexin A4                      |                                                                                                                                                                                                                                                                                          |
| POLR3E                      | polymerase (RNA) III (DNA directed) polypeptide E (80kD)                 |                                                                                                                                                                                                                                                                                          |
| POU3F2                      | POU class 3 homeobox 2                                                   | Class III POU genes are expressed predominantly in the central nervous system (CNS). It is likely that CNS-specific transcription factors such as these play an important role in mammalian neurogenesis.                                                                                |
| POU4F1                      | POU class 4 homeobox 1                                                   | POU4F1 is a class IV POU domain-containing transcription factor highly expressed in the developing sensory nervous system and in cells of the B- and T-lymphocytic lineages.                                                                                                             |
| POU4F2                      | POU class 4 homeobox 2                                                   | POU4F2 is found in human retina exclusively within a subpopulation of ganglion cells where it may play a role in determining or maintaining the identities of a small subset of visual system neurons.                                                                                   |
| PPP2R2C                     | protein phosphatase 2 (formerly 2A), regulatory subunit B, gamma isoform | Protein phosphatase 2 is one of the four major Ser/Thr phosphatases, and it is implicated in the negative control of cell growth and division                                                                                                                                            |
| PTEN                        | phosphatase and tensin homolog                                           | This protein preferentially dephosphorylates phosphoinositide substrates. It negatively regulates intracellular levels of phosphatidylinositol-3,4,5-trisphosphate in cells and functions as a tumor suppressor by negatively regulating AKT/PKB signaling pathway.                      |
| PTN                         | pleiotrophin                                                             |                                                                                                                                                                                                                                                                                          |
| RAP1GAP                     | RAP1 GTPase activating protein                                           |                                                                                                                                                                                                                                                                                          |

|          |                                                                    |                                                                                                                                                                                                                          |
|----------|--------------------------------------------------------------------|--------------------------------------------------------------------------------------------------------------------------------------------------------------------------------------------------------------------------|
| RHOQ     | ras homolog gene family, member Q                                  | TC10 is a member of the RAS superfamily of small GTP-binding proteins (see HRAS, MIM 190020) involved in insulin-stimulated glucose uptake.                                                                              |
| RIT2     | Ras-like without CAAX 2                                            | RIN belongs to the RAS (HRAS; MIM 190020) superfamily of small GTPases.                                                                                                                                                  |
| TNFRSF19 | tumor necrosis factor receptor superfamily, member 19              | This receptor is highly expressed during embryonic development. This receptor is capable of inducing apoptosis by a caspase-independent mechanism, and it is thought to play an essential role in embryonic development. |
| TNK2     | tyrosine kinase, non-receptor, 2                                   | This protein may be involved in a regulatory mechanism that sustains the GTP-bound active form of Cdc42Hs and which is directly linked to a tyrosine phosphorylation signal transduction pathway.                        |
| TPM3     | tropomyosin 3                                                      | This gene encodes a member of the tropomyosin family of actin-binding proteins involved in the contractile system of striated and smooth muscles and the cytoskeleton of non-muscle cells.                               |
| TRIO     | triple functional domain (PTPRF interacting)                       |                                                                                                                                                                                                                          |
| TRPC5    | transient receptor potential cation channel, subfamily C, member 5 |                                                                                                                                                                                                                          |

---

#### Nervous System

##### Development and

Function: Myelination: Myelination (2.22E-03) *including* Myelination of Nerves (4.51E-03), Myelination of Normal Cells (1.65E-02)

|          |                                                                                              |                                                                                                                                                                                                                                                           |
|----------|----------------------------------------------------------------------------------------------|-----------------------------------------------------------------------------------------------------------------------------------------------------------------------------------------------------------------------------------------------------------|
| B4GALNT1 | beta-1,4-N-acetyl-galactosaminyl transferase 1                                               | GalNAc-T is the enzyme involved in the biosynthesis of G(M2) and G(D2) glycosphingolipids. GalNAc-T catalyzes the transfer of GalNAc into G(M3) and G(D3) by a beta-1,4 linkage, resulting in the synthesis of G(M2) and G(D2), respectively.             |
| BACE1    | beta-site APP-cleaving enzyme 1                                                              | The encoded protein, a member of the peptidase A1 protein family, is a type I integral membrane glycoprotein and aspartic protease that is found mainly in the Golgi.                                                                                     |
| CLDN5    | claudin 5                                                                                    | Claudins, are a part of tight junctions which serve as a physical barrier to prevent solutes and water from passing freely through the paracellular space between epithelial or endothelial cell sheets.                                                  |
| CTF1     | cardiotrophin 1                                                                              | The protein encoded by this gene is a secreted cytokine that induces cardiac myocyte hypertrophy in vitro. It has been shown to bind and activate the ILST/gp130 receptor.                                                                                |
| FGF2     | fibroblast growth factor 2 (basic)                                                           | The CUG-initiated isoforms of this gene are localized in the nucleus and are responsible for the intracrine effect, whereas, the AUG-initiated form is mostly cytosolic and is responsible for the paracrine and autocrine effects of this FGF.           |
| GDNF     | glial cell derived neurotrophic factor                                                       | The recombinant form of this protein was shown to promote the survival and differentiation of dopaminergic neurons in culture, and was able to prevent apoptosis of motor neurons induced by axotomy.                                                     |
| HEXA     | hexosaminidase A (alpha polypeptide)                                                         | Hexosaminidase A is the alpha subunit of the lysosomal enzyme beta-hexosaminidase that, together with the cofactor GM2 activator protein, catalyzes the degradation of the ganglioside GM2, and other molecules containing terminal N-acetyl hexosamines. |
| ITGB1    | integrin, beta 1 (fibronectin receptor, beta polypeptide, antigen CD29 includes MDF2, MSK12) | Integrin family members are membrane receptors involved in cell adhesion and recognition in a variety of processes including embryogenesis, hemostasis, tissue repair, immune response and metastatic diffusion of tumor cells.                           |

|        |                                                                                                    |                                                                                                                                                                                                                                                                                                                                                             |
|--------|----------------------------------------------------------------------------------------------------|-------------------------------------------------------------------------------------------------------------------------------------------------------------------------------------------------------------------------------------------------------------------------------------------------------------------------------------------------------------|
| KCNJ10 | potassium inwardly-rectifying channel, subfamily J, member 10                                      | This protein may form a heterodimer with another potassium channel protein and may be responsible for the potassium buffering action of glial cells in the brain.                                                                                                                                                                                           |
| LAMA2  | laminin, alpha 2                                                                                   | Laminin, an extracellular protein, is a major component of the basement membrane. It is thought to mediate the attachment, migration, and organization of cells into tissues during embryonic development by interacting with other extracellular matrix components.                                                                                        |
| LAMA4  | laminin, alpha 4                                                                                   | Laminins, a family of extracellular matrix glycoproteins, are the major noncollagenous constituent of basement membranes. They have been implicated in a wide variety of biological processes including cell adhesion, differentiation, migration, signaling, neurite outgrowth and metastasis. This gene encodes the alpha chain isoform laminin, alpha 4. |
| LAMA5  | laminin, alpha 5                                                                                   | The protein encoded by this gene belongs to the alpha subfamily of laminin chains and is a major component of basement membranes.                                                                                                                                                                                                                           |
| MAL    | mal, T-cell differentiation protein                                                                | The protein has been localized to the endoplasmic reticulum of T-cells and is a candidate linker protein in T-cell signal transduction, and in compact myelin of cells in the nervous system and has been implicated in myelin biogenesis and/or function.                                                                                                  |
| MPDZ   | multiple PDZ domain protein                                                                        |                                                                                                                                                                                                                                                                                                                                                             |
| MYO5A  | myosin VA (heavy chain 12, myoxin)                                                                 | Myosin V is a class of actin-based motor proteins involved in cytoplasmic vesicle transport and anchorage, spindle-pole alignment and mRNA translocation. The protein encoded by this gene is abundant in melanocytes and nerve cells.                                                                                                                      |
| NRG1   | neuregulin 1                                                                                       | This protein is a signaling protein that mediates cell-cell interactions and plays critical roles in the growth and development of multiple organ systems.                                                                                                                                                                                                  |
| NTRK2  | neurotrophic tyrosine kinase, receptor, type 2                                                     | This kinase is a membrane-bound receptor that, upon neurotrophin binding, phosphorylates itself and members of the MAPK pathway. Signalling through this kinase leads to cell differentiation.                                                                                                                                                              |
| NTRK3  | neurotrophic tyrosine kinase, receptor, type 3                                                     | This kinase is a membrane-bound receptor that, upon neurotrophin binding, phosphorylates itself and members of the MAPK pathway. Signalling through this kinase leads to cell differentiation and may play a role in the development of proprioceptive neurons that sense body position.                                                                    |
| POU3F1 | POU class 3 homeobox 1                                                                             |                                                                                                                                                                                                                                                                                                                                                             |
| THRB   | thyroid hormone receptor, beta (erythroblastic leukemia viral (v-erb-a) oncogene homolog 2, avian) | The protein encoded by this gene is a nuclear hormone receptor for triiodothyronine. It is one of the several receptors for thyroid hormone, and has been shown to mediate the biological activities of thyroid hormone.                                                                                                                                    |
| UGT8   | UDP glycosyltransferase 8                                                                          | The key enzymatic step in the biosynthesis of galactocerebrosides consists of the transfer of galactose to ceramide catalyzed by UDP-galactose ceramide galactosyltransferase (CGT, EC 2.4.1.45).                                                                                                                                                           |

Nervous System  
Development and  
Function: Survival:  
Survival of Trigeminal  
Ganglion Neurons (2.65E-  
03)

|      |                                        |                                                                                                                                                                                                       |
|------|----------------------------------------|-------------------------------------------------------------------------------------------------------------------------------------------------------------------------------------------------------|
| BCL2 | B-cell CLL/lymphoma 2                  | This gene encodes an integral outer mitochondrial membrane protein that blocks the apoptotic death of some cells such as lymphocytes.                                                                 |
| GDNF | glial cell derived neurotrophic factor | The recombinant form of this protein was shown to promote the survival and differentiation of dopaminergic neurons in culture, and was able to prevent apoptosis of motor neurons induced by axotomy. |

|        |                                                                            |                                                                                                                                                                                                        |
|--------|----------------------------------------------------------------------------|--------------------------------------------------------------------------------------------------------------------------------------------------------------------------------------------------------|
| NRTN   | neurturin                                                                  | Neurturin is a member of the TGF-beta subfamily, TRN. This gene signals through RET and a GPI-linked coreceptor, and promotes survival of neuronal populations.                                        |
| POU4F1 | POU class 4 homeobox 1                                                     | POU4F1 is a class IV POU domain-containing transcription factor highly expressed in the developing sensory nervous system and in cells of the B- and T-lymphocytic lineages.                           |
| POU4F2 | POU class 4 homeobox 2                                                     | POU4F2 is found in human retina exclusively within a subpopulation of ganglion cells where it may play a role in determining or maintaining the identities of a small subset of visual system neurons. |
| SLC6A8 | solute carrier family 6 (neurotransmitter transporter, creatine), member 8 | The protein encoded by this gene is a plasma membrane protein whose function is to transport creatine into and out of cells.                                                                           |

Nervous System  
Development and  
Function: Survival:  
Survival of Spinal Cord  
Cells (5.00E-03)

|        |                                              |                                                                                                                                                                                                                         |
|--------|----------------------------------------------|-------------------------------------------------------------------------------------------------------------------------------------------------------------------------------------------------------------------------|
| CTF1   | cardiotrophin 1                              | The protein encoded by this gene is a secreted cytokine that induces cardiac myocyte hypertrophy in vitro. It has been shown to bind and activate the ILST/gp130 receptor.                                              |
| GDNF   | glial cell derived neurotrophic factor       | The recombinant form of this protein was shown to promote the survival and differentiation of dopaminergic neurons in culture, and was able to prevent apoptosis of motor neurons induced by axotomy.                   |
| IGF1   | insulin-like growth factor 1 (somatomedin C) | The protein encoded by this gene is similar to insulin in function and structure and is a member of a family of proteins involved in mediating growth and development.                                                  |
| IL11   | interleukin 11                               | This cytokine is shown to stimulate the T-cell-dependent development of immunoglobulin-producing B cells. It is also found to support the proliferation of hematopoietic stem cells and megakaryocyte progenitor cells. |
| POU4F1 | POU class 4 homeobox 1                       | POU4F1 is a class IV POU domain-containing transcription factor highly expressed in the developing sensory nervous system and in cells of the B- and T-lymphocytic lineages.                                            |
| PTN    | pleiotrophin                                 |                                                                                                                                                                                                                         |

Nervous System  
Development and  
Function: Survival:  
Survival of Neurons  
(8.94E-03)

|        |                                            |                                                                                                                                                                                                              |
|--------|--------------------------------------------|--------------------------------------------------------------------------------------------------------------------------------------------------------------------------------------------------------------|
| AMIGO2 | adhesion molecule with Ig-like domain 2    |                                                                                                                                                                                                              |
| BCL2   | B-cell CLL/lymphoma 2                      | This gene encodes an integral outer mitochondrial membrane protein that blocks the apoptotic death of some cells such as lymphocytes.                                                                        |
| CDC2   | cell division cycle 2, G1 to S and G2 to M | This protein is a catalytic subunit of the highly conserved protein kinase complex known as M-phase promoting factor (MPF), which is essential for G1/S and G2/M phase transitions of eukaryotic cell cycle. |
| CTF1   | cardiotrophin 1                            | The protein encoded by this gene is a secreted cytokine that induces cardiac myocyte hypertrophy in vitro. It has been shown to bind and activate the ILST/gp130 receptor.                                   |
| DCC    | deleted in colorectal carcinoma            |                                                                                                                                                                                                              |

|        |                                                                |                                                                                                                                                                                                                                                                                                                                                       |
|--------|----------------------------------------------------------------|-------------------------------------------------------------------------------------------------------------------------------------------------------------------------------------------------------------------------------------------------------------------------------------------------------------------------------------------------------|
| E2F1   | E2F transcription factor 1                                     | The protein encoded by this gene is a member of the E2F family of transcription factors which plays a crucial role in the control of cell cycle and action of tumor suppressor proteins and is also a target of the transforming proteins of small DNA tumor viruses. It can mediate both cell proliferation and p53-dependent/independent apoptosis. |
| EFNA3  | ephrin-A3                                                      | The ephrins and EPH-related receptors comprise the largest subfamily of receptor protein-tyrosine kinases and have been implicated in mediating developmental events, especially in the nervous system and in erythropoiesis.                                                                                                                         |
| FGF1   | fibroblast growth factor 1 (acidic)                            | This protein functions as a modifier of endothelial cell migration and proliferation, as well as an angiogenic factor. It acts as a mitogen for a variety of mesoderm- and neuroectoderm-derived cells in vitro, thus is thought to be involved in organogenesis.                                                                                     |
| FGF2   | fibroblast growth factor 2 (basic)                             | The CUG-initiated isoforms of this gene are localized in the nucleus and are responsible for the intracrine effect, whereas, the AUG-initiated form is mostly cytosolic and is responsible for the paracrine and autocrine effects of this FGF.                                                                                                       |
| FGF5   | fibroblast growth factor 5                                     | This gene was identified as an oncogene, which confers transforming potential when transfected into mammalian cells.                                                                                                                                                                                                                                  |
| GAD2   | glutamate decarboxylase 2 (pancreatic islets and brain, 65kDa) | This gene encodes one of several forms of glutamic acid decarboxylase, identified as a major autoantigen in insulin-dependent diabetes.                                                                                                                                                                                                               |
| GDNF   | glial cell derived neurotrophic factor                         | The recombinant form of this protein was shown to promote the survival and differentiation of dopaminergic neurons in culture, and was able to prevent apoptosis of motor neurons induced by axotomy.                                                                                                                                                 |
| GPR44  | G protein-coupled receptor 44                                  | These proteins mediate signals to the interior of the cell via activation of heterotrimeric G proteins that in turn activate various effector proteins, ultimately resulting in a physiologic response.                                                                                                                                               |
| HGF    | hepatocyte growth factor (hepapoietin A; scatter factor)       | Hepatocyte growth factor regulates cell growth, cell motility, and morphogenesis by activating a tyrosine kinase signaling cascade after binding to the proto-oncogenic c-Met receptor. Its ability to stimulate mitogenesis, cell motility, and matrix invasion gives it a central role in angiogenesis, tumorigenesis, and tissue regeneration.     |
| IGF1   | insulin-like growth factor 1 (somatomedin C)                   | The protein encoded by this gene is similar to insulin in function and structure and is a member of a family of proteins involved in mediating growth and development.                                                                                                                                                                                |
| IL3    | interleukin 3 (colony-stimulating factor, multiple)            | This protein is a potent growth promoting cytokine, especially with hematopoietic cell types. It is involved in cell growth, differentiation and apoptosis, and also possesses neurotrophic activity.                                                                                                                                                 |
| IL11   | interleukin 11                                                 | This cytokine is shown to stimulate the T-cell-dependent development of immunoglobulin-producing B cells. It is also found to support the proliferation of hematopoietic stem cells and megakaryocyte progenitor cells.                                                                                                                               |
| LINGO1 | leucine rich repeat and Ig domain containing 1                 |                                                                                                                                                                                                                                                                                                                                                       |
| MAPT   | microtubule-associated protein tau                             | MAPT transcripts are differentially expressed in the nervous system, depending on stage of neuronal maturation and neuron type.                                                                                                                                                                                                                       |
| MET    | met proto-oncogene (hepatocyte growth factor receptor)         | The proto-oncogene MET product is the hepatocyte growth factor receptor and encodes tyrosine-kinase activity.                                                                                                                                                                                                                                         |

|        |                                                                               |                                                                                                                                                                                                                                                                                                                                                                                        |
|--------|-------------------------------------------------------------------------------|----------------------------------------------------------------------------------------------------------------------------------------------------------------------------------------------------------------------------------------------------------------------------------------------------------------------------------------------------------------------------------------|
| MUSK   | muscle, skeletal, receptor tyrosine kinase                                    | This kinase activity is regulated by the binding of a cognate ligand to the extracellular portion of the receptor. DeChiara et al. (1996) [PubMed 8653786] noted that the RTKs, known to be expressed in cell type-specific fashions, play a role critical for the growth and differentiation of those cell types.                                                                     |
| MYCN   | v-myc myelocytomatosis viral related oncogene, neuroblastoma derived (avian)  | This gene is a member of the MYC family and encodes a protein with a basic helix-loop-helix (bHLH) domain. This protein is located in the nucleus and must dimerize with another bHLH protein in order to bind DNA. Amplification of this gene is associated with a variety of tumors, most notably neuroblastomas.                                                                    |
| NEFL   | neurofilament, light polypeptide                                              | Neurofilaments are type IV intermediate filament heteropolymers composed of light, medium, and heavy chains. Neurofilaments comprise the axoskeleton and they functionally maintain the neuronal caliber. They may also play a role in intracellular transport to axons and dendrites. This gene encodes the light chain neurofilament protein.                                        |
| NF1    | neurofibromin 1                                                               | This gene product appears to function as a negative regulator of the ras signal transduction pathway.                                                                                                                                                                                                                                                                                  |
| NRG1   | neuregulin 1                                                                  | This protein is a signaling protein that mediates cell-cell interactions and plays critical roles in the growth and development of multiple organ systems.                                                                                                                                                                                                                             |
| NRTN   | neurturin                                                                     | Neurturin is a member of the TGF-beta subfamily, TRN. This gene signals through RET and a GPI-linked coreceptor, and promotes survival of neuronal populations.                                                                                                                                                                                                                        |
| NTRK2  | neurotrophic tyrosine kinase, receptor, type 2                                | This kinase is a membrane-bound receptor that, upon neurotrophin binding, phosphorylates itself and members of the MAPK pathway. Signalling through this kinase leads to cell differentiation.                                                                                                                                                                                         |
| NTRK3  | neurotrophic tyrosine kinase, receptor, type 3                                | This kinase is a membrane-bound receptor that, upon neurotrophin binding, phosphorylates itself and members of the MAPK pathway. Signalling through this kinase leads to cell differentiation and may play a role in the development of proprioceptive neurons that sense body position.                                                                                               |
| PEG3   | paternally expressed 3                                                        |                                                                                                                                                                                                                                                                                                                                                                                        |
| POU4F1 | POU class 4 homeobox 1                                                        | POU4F1 is a class IV POU domain-containing transcription factor highly expressed in the developing sensory nervous system and in cells of the B- and T-lymphocytic lineages.                                                                                                                                                                                                           |
| POU4F2 | POU class 4 homeobox 2                                                        | POU4F2 is found in human retina exclusively within a subpopulation of ganglion cells where it may play a role in determining or maintaining the identities of a small subset of visual system neurons.                                                                                                                                                                                 |
| PRKCG  | protein kinase C, gamma                                                       | This kinase is expressed solely in the brain and spinal cord and its localization is restricted to neurons. It has been demonstrated that several neuronal functions, including long term potentiation (LTP) and long term depression (LTD), specifically require this kinase. Knockout studies in mice also suggest that this kinase may be involved in neuropathic pain development. |
| PTN    | pleiotrophin                                                                  |                                                                                                                                                                                                                                                                                                                                                                                        |
| SLC1A2 | solute carrier family 1 (glial high affinity glutamate transporter), member 2 | The membrane-bound protein is the principal transporter that clears the excitatory neurotransmitter glutamate from the extracellular space at synapses in the central nervous system. Glutamate clearance is necessary for proper synaptic activation and to prevent neuronal damage from excessive activation of glutamate receptors.                                                 |
| SLC6A8 | solute carrier family 6 (neurotransmitter transporter, creatine), member 8    | The protein encoded by this gene is a plasma membrane protein whose function is to transport creatine into and out of cells.                                                                                                                                                                                                                                                           |
| UNC5B  | unc-5 homolog B (C. elegans)                                                  | UNC5B belongs to a family of netrin-1 (MIM 601614) receptors thought to mediate the chemorepulsive effect of netrin-1 on specific axons.                                                                                                                                                                                                                                               |

|                                                                                                                      |        |                                                                            |                                                                                                                                                                                                                         |
|----------------------------------------------------------------------------------------------------------------------|--------|----------------------------------------------------------------------------|-------------------------------------------------------------------------------------------------------------------------------------------------------------------------------------------------------------------------|
|                                                                                                                      | XIAP   | X-linked inhibitor of apoptosis                                            | This protein inhibits apoptosis induced by menadione, a potent inducer of free radicals, and ICE. It also inhibits at least two members of the caspase family of cell-death proteases.                                  |
| Nervous System<br>Development and<br>Function: Survival:<br>Survival of Dorsal Root<br>Ganglion Cells (9.23E-<br>03) | CTF1   | cardiotrophin 1                                                            | The protein encoded by this gene is a secreted cytokine that induces cardiac myocyte hypertrophy in vitro. It has been shown to bind and activate the ILST/gp130 receptor.                                              |
|                                                                                                                      | GDNF   | glial cell derived neurotrophic factor                                     | The recombinant form of this protein was shown to promote the survival and differentiation of dopaminergic neurons in culture, and was able to prevent apoptosis of motor neurons induced by axotomy.                   |
|                                                                                                                      | IL11   | interleukin 11                                                             | This cytokine is shown to stimulate the T-cell-dependent development of immunoglobulin-producing B cells. It is also found to support the proliferation of hematopoietic stem cells and megakaryocyte progenitor cells. |
|                                                                                                                      | POU4F1 | POU class 4 homeobox 1                                                     | POU4F1 is a class IV POU domain-containing transcription factor highly expressed in the developing sensory nervous system and in cells of the B- and T-lymphocytic lineages.                                            |
| Nervous System<br>Development and<br>Function: Survival:<br>Survival of Ganglion<br>Cells (1.24E-02)                 | BCL2   | B-cell CLL/lymphoma 2                                                      | This gene encodes an integral outer mitochondrial membrane protein that blocks the apoptotic death of some cells such as lymphocytes.                                                                                   |
|                                                                                                                      | CTF1   | cardiotrophin 1                                                            | The protein encoded by this gene is a secreted cytokine that induces cardiac myocyte hypertrophy in vitro. It has been shown to bind and activate the ILST/gp130 receptor.                                              |
|                                                                                                                      | GDNF   | glial cell derived neurotrophic factor                                     | The recombinant form of this protein was shown to promote the survival and differentiation of dopaminergic neurons in culture, and was able to prevent apoptosis of motor neurons induced by axotomy.                   |
|                                                                                                                      | IL11   | interleukin 11                                                             | This cytokine is shown to stimulate the T-cell-dependent development of immunoglobulin-producing B cells. It is also found to support the proliferation of hematopoietic stem cells and megakaryocyte progenitor cells. |
|                                                                                                                      | NRTN   | neurturin                                                                  | Neurturin is a member of the TGF-beta subfamily, TRN. This gene signals through RET and a GPI-linked coreceptor, and promotes survival of neuronal populations.                                                         |
|                                                                                                                      | POU4F1 | POU class 4 homeobox 1                                                     | POU4F1 is a class IV POU domain-containing transcription factor highly expressed in the developing sensory nervous system and in cells of the B- and T-lymphocytic lineages.                                            |
|                                                                                                                      | POU4F2 | POU class 4 homeobox 2                                                     | POU4F2 is found in human retina exclusively within a subpopulation of ganglion cells where it may play a role in determining or maintaining the identities of a small subset of visual system neurons.                  |
|                                                                                                                      | SLC6A8 | solute carrier family 6 (neurotransmitter transporter, creatine), member 8 | The protein encoded by this gene is a plasma membrane protein whose function is to transport creatine into and out of cells.                                                                                            |



Nervous System  
Development and  
Function: Size: Size of  
Nervous Tissue (3.56E-  
03)

|       |                                                 |                                                                                                                                                                        |
|-------|-------------------------------------------------|------------------------------------------------------------------------------------------------------------------------------------------------------------------------|
| EBF1  | early B-cell factor 1                           |                                                                                                                                                                        |
| FZD3  | frizzled homolog 3 (Drosophila)                 | The function of this protein is unknown, although it may play a role in mammalian hair follicle development.                                                           |
| IGF1  | insulin-like growth factor 1 (somatomedin C)    | The protein encoded by this gene is similar to insulin in function and structure and is a member of a family of proteins involved in mediating growth and development. |
| NR2E1 | nuclear receptor subfamily 2, group E, member 1 |                                                                                                                                                                        |

Nervous System  
Development and  
Function: Proliferation:  
Proliferation of Neurons  
(4.85E-03) *including*  
Proliferation of Neuronal  
Progenitor Cells (4.85E-  
03)

|       |                                                |                                                                                                                                                                                                                                                                                                                                                                                                                                          |
|-------|------------------------------------------------|------------------------------------------------------------------------------------------------------------------------------------------------------------------------------------------------------------------------------------------------------------------------------------------------------------------------------------------------------------------------------------------------------------------------------------------|
| ACSL6 | acyl-CoA synthetase long-chain family member 6 |                                                                                                                                                                                                                                                                                                                                                                                                                                          |
| ACSL1 | acyl-CoA synthetase long-chain family member 1 | The protein converts free long-chain fatty acids into fatty acyl-CoA esters, and thereby play a key role in lipid biosynthesis and fatty acid degradation.                                                                                                                                                                                                                                                                               |
| ATM   | ataxia telangiectasia mutated                  | This protein functions as a regulator of a wide variety of downstream proteins, including tumor suppressor proteins p53 and BRCA1, checkpoint kinase CHK2, checkpoint proteins RAD17 and RAD9, and DNA repair protein NBS1. This protein and the closely related kinase ATR are thought to be master controllers of cell cycle checkpoint signaling pathways that are required for cell response to DNA damage and for genome stability. |
| CD24  | CD24 molecule                                  | This gene encodes a sialoglycoprotein that is expressed on mature granulocytes and in many B cells.                                                                                                                                                                                                                                                                                                                                      |
| CDON  | Cdon homolog (mouse)                           | CDON and BOC (MIM 608708) are cell surface receptors of the immunoglobulin (Ig)/fibronectin type III (FNIII; see MIM 135600) repeat family involved in myogenic differentiation. CDON and BOC are coexpressed during development.                                                                                                                                                                                                        |
| CNR1  | cannabinoid receptor 1 (brain)                 | This gene encodes one of two cannabinoid receptors, which have been found to be involved in the cannabinoid-induced CNS effects (including alterations in mood and cognition) experienced by users of marijuana.                                                                                                                                                                                                                         |
| E2F1  | E2F transcription factor 1                     | The protein encoded by this gene is a member of the E2F family of transcription factors which plays a crucial role in the control of cell cycle and action of tumor suppressor proteins and is also a target of the transforming proteins of small DNA tumor viruses. It can mediate both cell proliferation and p53-dependent/independent apoptosis.                                                                                    |
| FGF2  | fibroblast growth factor 2 (basic)             | The CUG-initiated isoforms of this gene are localized in the nucleus and are responsible for the intracrine effect, whereas, the AUG-initiated form is mostly cytosolic and is responsible for the paracrine and autocrine effects of this FGF.                                                                                                                                                                                          |

|       |                                                                                                 |                                                                                                                                                                                                                                                                                                                     |
|-------|-------------------------------------------------------------------------------------------------|---------------------------------------------------------------------------------------------------------------------------------------------------------------------------------------------------------------------------------------------------------------------------------------------------------------------|
| GDNF  | glial cell derived neurotrophic factor                                                          | The recombinant form of this protein was shown to promote the survival and differentiation of dopaminergic neurons in culture, and was able to prevent apoptosis of motor neurons induced by axotomy.                                                                                                               |
| HHIP  | hedgehog interacting protein                                                                    | This protein similar to the mouse hedgehog-interacting protein, which is involved in many fundamental processes in embryonic development, including anteroposterior patterns of limbs and regulation of left-right asymmetry.                                                                                       |
| ID4   | inhibitor of DNA binding 4, dominant negative helix-loop-helix protein                          | Consequently, Id proteins inhibit binding to DNA and transcriptional transactivation by heterodimerization with bHLH proteins.                                                                                                                                                                                      |
| IGF1  | insulin-like growth factor 1 (somatomedin C)                                                    | The protein encoded by this gene is similar to insulin in function and structure and is a member of a family of proteins involved in mediating growth and development.                                                                                                                                              |
| MAPT  | microtubule-associated protein tau                                                              | MAPT transcripts are differentially expressed in the nervous system, depending on stage of neuronal maturation and neuron type.                                                                                                                                                                                     |
| MYCN  | v-myc myelocytomatosis viral related oncogene, neuroblastoma derived (avian)                    | This gene is a member of the MYC family and encodes a protein with a basic helix-loop-helix (bHLH) domain. This protein is located in the nucleus and must dimerize with another bHLH protein in order to bind DNA. Amplification of this gene is associated with a variety of tumors, most notably neuroblastomas. |
| NCAM1 | neural cell adhesion molecule 1                                                                 |                                                                                                                                                                                                                                                                                                                     |
| NF1   | neurofibromin 1                                                                                 | This gene product appears to function as a negative regulator of the ras signal transduction pathway.                                                                                                                                                                                                               |
| OTP   | orthopedia homeobox                                                                             | This protein may function during brain development.                                                                                                                                                                                                                                                                 |
| PDGFB | platelet-derived growth factor beta polypeptide (simian sarcoma viral (v-sis) oncogene homolog) | The protein encoded by this gene is a member of the platelet-derived growth factor family. The four members of this family are mitogenic factors for cells of mesenchymal origin and are characterized by a motif of eight cysteines.                                                                               |
| SMO   | smoothened homolog (Drosophila)                                                                 |                                                                                                                                                                                                                                                                                                                     |
| SOX2  | SRY (sex determining region Y)-box 2                                                            | This protein is required for stem-cell maintenance in the central nervous system, and also regulates gene expression in the stomach.                                                                                                                                                                                |
| ZIC1  | Zic family member 1 (odd-paired homolog, Drosophila)                                            | This gene encodes a transcription factor that can bind and transactivate the apolipoprotein E gene.                                                                                                                                                                                                                 |

---

Nervous System  
Development and  
Function:

Neuritogenesis:  
Neuritogenesis of  
Eukaryotic Cells (5.32E-  
03) *including*  
Neuritogenesis of  
Neurons (1.65E-02)

|         |                                                            |                                                                                                                                                                                                        |
|---------|------------------------------------------------------------|--------------------------------------------------------------------------------------------------------------------------------------------------------------------------------------------------------|
| ACE     | angiotensin I converting enzyme (peptidyl-dipeptidase A) 1 | This gene encodes an enzyme involved in catalyzing the conversion of angiotensin I into a physiologically active peptide angiotensin II. This enzyme plays a key role in the renin-angiotensin system. |
| ARHGAP5 | Rho GTPase activating protein 5                            | This protein negatively regulates RHO GTPases, a family which may mediate cytoskeleton changes by stimulating the hydrolysis of bound GTP.                                                             |

|                                                                                                                                               |         |                                                                          |                                                                                                                                                                                                                                                                                                                                                                     |
|-----------------------------------------------------------------------------------------------------------------------------------------------|---------|--------------------------------------------------------------------------|---------------------------------------------------------------------------------------------------------------------------------------------------------------------------------------------------------------------------------------------------------------------------------------------------------------------------------------------------------------------|
|                                                                                                                                               | BCL2    | B-cell CLL/lymphoma 2                                                    | This gene encodes an integral outer mitochondrial membrane protein that blocks the apoptotic death of some cells such as lymphocytes.                                                                                                                                                                                                                               |
|                                                                                                                                               | FGF2    | fibroblast growth factor 2 (basic)                                       | The CUG-initiated isoforms of this gene are localized in the nucleus and are responsible for the intracrine effect, whereas, the AUG-initiated form is mostly cytosolic and is responsible for the paracrine and autocrine effects of this FGF.                                                                                                                     |
|                                                                                                                                               | FGFR2   | fibroblast growth factor receptor 2                                      | The extracellular portion of this protein interacts with fibroblast growth factors, setting in motion a cascade of downstream signals, ultimately influencing mitogenesis and differentiation.                                                                                                                                                                      |
|                                                                                                                                               | GDNF    | glial cell derived neurotrophic factor                                   | The recombinant form of this protein was shown to promote the survival and differentiation of dopaminergic neurons in culture, and was able to prevent apoptosis of motor neurons induced by axotomy.                                                                                                                                                               |
|                                                                                                                                               | NCAM1   | neural cell adhesion molecule 1                                          |                                                                                                                                                                                                                                                                                                                                                                     |
|                                                                                                                                               | NRTN    | neurturin                                                                | Neurturin is a member of the TGF-beta subfamily, TRN. This gene signals through RET and a GPI-linked coreceptor, and promotes survival of neuronal populations.                                                                                                                                                                                                     |
|                                                                                                                                               | PPP2R2C | protein phosphatase 2 (formerly 2A), regulatory subunit B, gamma isoform | Protein phosphatase 2 is one of the four major Ser/Thr phosphatases, and it is implicated in the negative control of cell growth and division                                                                                                                                                                                                                       |
|                                                                                                                                               | PTN     | pleiotrophin                                                             |                                                                                                                                                                                                                                                                                                                                                                     |
| Nervous System Development and Function: Density: Density of Synapse (9.23E-03)                                                               | EFNB3   | ephrin-B3                                                                | EFNB3, a member of the ephrin gene family, is important in brain development as well as in its maintenance. It may play a pivotal role in forebrain function. The EPH and EPH-related receptors comprise the largest subfamily of receptor protein-tyrosine kinases and have been implicated in mediating developmental events, particularly in the nervous system. |
|                                                                                                                                               | GPM6A   | glycoprotein M6A                                                         |                                                                                                                                                                                                                                                                                                                                                                     |
|                                                                                                                                               | NTRK2   | neurotrophic tyrosine kinase, receptor, type 2                           | This kinase is a membrane-bound receptor that, upon neurotrophin binding, phosphorylates itself and members of the MAPK pathway. Signalling through this kinase leads to cell differentiation.                                                                                                                                                                      |
|                                                                                                                                               | NTRK3   | neurotrophic tyrosine kinase, receptor, type 3                           | This kinase is a membrane-bound receptor that, upon neurotrophin binding, phosphorylates itself and members of the MAPK pathway. Signalling through this kinase leads to cell differentiation and may play a role in the development of proprioceptive neurons that sense body position.                                                                            |
| Nervous System Development and Function: Neuroprotection: Neuroprotection of Cells (1.60E-02) including Neuroprotection of Neurons (1.65E-02) | CHRNA7  | cholinergic receptor, nicotinic, alpha 7                                 | The protein encoded by this gene forms a homo-oligomeric channel, displays marked permeability to calcium ions and is a major component of brain nicotinic receptors that are blocked by, and highly sensitive to, alpha-bungarotoxin.                                                                                                                              |
|                                                                                                                                               | CNR1    | cannabinoid receptor 1 (brain)                                           | This gene encodes one of two cannabinoid receptors, which have been found to be involved in the cannabinoid-induced CNS effects (including alterations in mood and cognition) experienced by users of marijuana.                                                                                                                                                    |

|                                                                                                                       |        |                                                                  |                                                                                                                                                                                                                                                                         |
|-----------------------------------------------------------------------------------------------------------------------|--------|------------------------------------------------------------------|-------------------------------------------------------------------------------------------------------------------------------------------------------------------------------------------------------------------------------------------------------------------------|
|                                                                                                                       | CRH    | corticotropin releasing hormone                                  | CRH is secreted by the paraventricular nucleus (PVN) of the hypothalamus in response to stress. In the placenta CRH is a marker that determines the length of gestation and the timing of parturition and delivery. CRH may also act as a trigger for parturition.      |
|                                                                                                                       | CRHR1  | corticotropin releasing hormone receptor 1                       | The encoded protein is essential for the activation of signal transduction pathways that regulate diverse physiological processes including stress, reproduction, immune response and obesity.                                                                          |
|                                                                                                                       | F2R    | coagulation factor II (thrombin) receptor                        | Coagulation factor II receptor is a 7-transmembrane receptor involved in the regulation of thrombotic response.                                                                                                                                                         |
|                                                                                                                       | GDNF   | glial cell derived neurotrophic factor                           | The recombinant form of this protein was shown to promote the survival and differentiation of dopaminergic neurons in culture, and was able to prevent apoptosis of motor neurons induced by axotomy.                                                                   |
|                                                                                                                       | IGF1   | insulin-like growth factor 1 (somatomedin C)                     | The protein encoded by this gene is similar to insulin in function and structure and is a member of a family of proteins involved in mediating growth and development.                                                                                                  |
| <hr/>                                                                                                                 |        |                                                                  |                                                                                                                                                                                                                                                                         |
| Nervous System<br>Development and<br>Function: Activation:<br>Activation of Nervous<br>Cell Lines (1.70E-02)          | ANGPT1 | angiopoietin 1                                                   | This protein plays a role in mediating reciprocal interactions between the endothelium and surrounding matrix and mesenchyme. It also contributes to blood vessel maturation and stability, and may be involved in early development of the heart.                      |
|                                                                                                                       | ERBB4  | v-erb-a erythroblastic leukemia viral oncogene homolog 4 (avian) | This gene encodes a protein which binds to and is activated by neuregulins and other factors and induces a variety of cellular responses including mitogenesis and differentiation.                                                                                     |
|                                                                                                                       | NRG1   | neuregulin 1                                                     | This protein is a signaling protein that mediates cell-cell interactions and plays critical roles in the growth and development of multiple organ systems.                                                                                                              |
| <hr/>                                                                                                                 |        |                                                                  |                                                                                                                                                                                                                                                                         |
| Digestive System<br>Development: Feeding:<br>Feeding (1.23E-05)<br><i>including</i> Feeding of<br>Organism (2.02E-05) | CCKAR  | cholecystokinin A receptor                                       | This receptor is a major physiologic mediator of pancreatic enzyme secretion and smooth muscle contraction of the gallbladder and stomach. In the central and peripheral nervous system this receptor regulates satiety and the release of beta-endorphin and dopamine. |
|                                                                                                                       | CNR1   | cannabinoid receptor 1 (brain)                                   | This gene encodes one of two cannabinoid receptors, which have been found to be involved in the cannabinoid-induced CNS effects (including alterations in mood and cognition) experienced by users of marijuana.                                                        |
|                                                                                                                       | CRH    | corticotropin releasing hormone                                  | CRH is secreted by the paraventricular nucleus (PVN) of the hypothalamus in response to stress. In the placenta CRH is a marker that determines the length of gestation and the timing of parturition and delivery. CRH may also act as a trigger for parturition.      |
|                                                                                                                       | CRHR1  | corticotropin releasing hormone receptor 1                       | The encoded protein is essential for the activation of signal transduction pathways that regulate diverse physiological processes including stress, reproduction, immune response and obesity.                                                                          |
|                                                                                                                       | DMBX1  | diencephalon/mesencephalon homeobox 1                            | The encoded protein acts as a transcription factor and may play a role in brain and sensory organ development.                                                                                                                                                          |
|                                                                                                                       | GALP   | galanin-like peptide                                             | The encoded protein binds galanin receptors 1, 2 and 3 with the highest affinity for galanin receptor 3 and has been implicated in biological processes involving the central nervous system including hypothalamic regulation of metabolism and reproduction.          |
|                                                                                                                       | GALR3  | galanin receptor 3                                               | The neuropeptide galanin modulates a variety of physiologic processes including cognition/memory, sensory/pain processing, hormone secretion, and feeding behavior.                                                                                                     |

|        |                                                         |                                                                                                                                                                                                                                                                                                                              |
|--------|---------------------------------------------------------|------------------------------------------------------------------------------------------------------------------------------------------------------------------------------------------------------------------------------------------------------------------------------------------------------------------------------|
| GCG    | glucagon                                                | Glucagon, is a pancreatic hormone that counteracts the glucose-lowering action of insulin by stimulating glycogenolysis and gluconeogenesis.                                                                                                                                                                                 |
| GHSR   | growth hormone secretagogue receptor                    | The encoded protein may play a role in energy homeostasis and regulation of body weight.                                                                                                                                                                                                                                     |
| GLP1R  | glucagon-like peptide 1 receptor                        |                                                                                                                                                                                                                                                                                                                              |
| GRIN2B | glutamate receptor, ionotropic, N-methyl D-aspartate 2B | This NMDA receptor channel has been shown to be involved in long-term potentiation, an activity-dependent increase in the efficiency of synaptic transmission thought to underlie certain kinds of memory and learning.                                                                                                      |
| HCRTR2 | hypocretin (orexin) receptor 2                          | The protein encoded by this gene is involved in the regulation of feeding behavior. The encoded protein binds the hypothalamic neuropeptides orexin A and orexin B.                                                                                                                                                          |
| HRH3   | histamine receptor H3                                   | This gene encodes one of the histamine receptors (H3) which can regulate neurotransmitter release. This receptor can also increase voltage-dependent calcium current in smooth muscles and innervates the blood vessels and the heart in cardiovascular system.                                                              |
| HTR2C  | 5-hydroxytryptamine (serotonin) receptor 2C             | Serotonin (5-hydroxytryptamine, 5-HT), a neurotransmitter, elicits a wide array of physiological effects by binding to several receptor subtypes, including the 5-HT <sub>2</sub> family of seven-transmembrane-spanning, G-protein-coupled receptors, which activate phospholipase C and D signaling pathways.              |
| IL1RN  | interleukin 1 receptor antagonist                       | This protein inhibits the activities of interleukin 1, alpha (IL1A) and interleukin 1, beta (IL1B), and modulates a variety of interleukin 1 related immune and inflammatory responses.                                                                                                                                      |
| JAK1   | Janus kinase 1                                          | JAK1 is involved in the interferon-alpha/beta and -gamma signal transduction pathways. These kinases couple cytokine ligand binding to tyrosine phosphorylation of various known signaling proteins and of a unique family of transcription factors termed the signal transducers and activators of transcription, or STATs. |
| JPH1   | junctional protein 1                                    | The protein encoded by this gene is a component of junctional complexes and is composed of a C-terminal hydrophobic segment spanning the endoplasmic/sarcoplasmic reticulum membrane and a remaining cytoplasmic domain that shows specific affinity for the plasma membrane.                                                |
| LALBA  | lactalbumin, alpha-                                     | This gene encodes alpha-lactalbumin, a principal protein of milk.                                                                                                                                                                                                                                                            |
| LEPR   | leptin receptor                                         | Leptin (LEP; MIM 164160), an adipocyte-specific hormone that regulates adipose-tissue mass through hypothalamic effects on satiety and energy expenditure, acts through the leptin receptor (LEPR).                                                                                                                          |
| MCHR1  | melanin-concentrating hormone receptor 1                | This protein binds melanin-concentrating hormone. The encoded protein can inhibit cAMP accumulation and stimulate intracellular calcium flux, and is probably involved in the neuronal regulation of food consumption.                                                                                                       |
| NKX2-1 | NK2 homeobox 1                                          |                                                                                                                                                                                                                                                                                                                              |
| NPY1R  | neuropeptide Y receptor Y1                              | Neuropeptide Y exhibits a diverse range of important physiologic activities, including effects on psychomotor activity, food intake, regulation of central endocrine secretion, and potent vasoactive effects on the cardiovascular system.                                                                                  |
| NPY2R  | neuropeptide Y receptor Y2                              |                                                                                                                                                                                                                                                                                                                              |
| NTRK2  | neurotrophic tyrosine kinase, receptor, type 2          | This kinase is a membrane-bound receptor that, upon neurotrophin binding, phosphorylates itself and members of the MAPK pathway. Signalling through this kinase leads to cell differentiation.                                                                                                                               |
| OPRK1  | opioid receptor, kappa 1                                |                                                                                                                                                                                                                                                                                                                              |
| PEX13  | peroxisomal biogenesis factor 13                        | This gene encodes a peroxisomal membrane protein that binds the type 1 peroxisomal targeting signal receptor via a SH3 domain located in the cytoplasm.                                                                                                                                                                      |

|         |                                                          |                                                                                                                                                                                                                                                                                                                                               |
|---------|----------------------------------------------------------|-----------------------------------------------------------------------------------------------------------------------------------------------------------------------------------------------------------------------------------------------------------------------------------------------------------------------------------------------|
| POU4F1  | POU class 4 homeobox 1                                   | POU4F1 is a class IV POU domain-containing transcription factor highly expressed in the developing sensory nervous system and in cells of the B- and T-lymphocytic lineages.                                                                                                                                                                  |
| PRLH    | prolactin releasing hormone                              |                                                                                                                                                                                                                                                                                                                                               |
| PTGER3  | prostaglandin E receptor 3 (subtype EP3)                 | The functions of this protein include digestion, nervous system, kidney reabsorption, and uterine contraction activities. This receptor may also mediate adrenocorticotrophic hormone response as well as fever generation in response to exogenous and endogenous stimuli.                                                                   |
| PTK2    | PTK2 protein tyrosine kinase 2                           | Activation of this gene may be an important early step in cell growth and intracellular signal transduction pathways triggered in response to certain neural peptides or to cell interactions with the extracellular matrix.                                                                                                                  |
| PYY     | peptide YY                                               |                                                                                                                                                                                                                                                                                                                                               |
| SLC18A2 | solute carrier family 18 (vesicular monoamine), member 2 | The vesicular monoamine transporter acts to accumulate cytosolic monoamines into synaptic vesicles, using the proton gradient maintained across the synaptic vesicular membrane. Its proper function is essential to the correct activity of the monoaminergic systems that have been implicated in several human neuropsychiatric disorders. |
| TH      | tyrosine hydroxylase                                     | The protein encoded by this gene is involved in the conversion of tyrosine to dopamine. It is the rate-limiting enzyme in the synthesis of catecholamines, hence plays a key role in the physiology of adrenergic neurons.                                                                                                                    |
| TRH     | thyrotropin-releasing hormone                            |                                                                                                                                                                                                                                                                                                                                               |

Digestive System  
Development:  
Development:  
Development of Tooth  
(1.31E-02)

|       |                                       |                                                                                                                                                                                                                                                               |
|-------|---------------------------------------|---------------------------------------------------------------------------------------------------------------------------------------------------------------------------------------------------------------------------------------------------------------|
| BMP7  | bone morphogenetic protein 7          | Based on its expression early in embryogenesis, the BMP encoded by this gene has a proposed role in early development and possible bone inductive activity.                                                                                                   |
| DLX1  | distal-less homeobox 1                | This protein may function as a transcriptional regulator of signals from multiple TGF- $\beta$ superfamily members. It may play a role in the control of craniofacial patterning and the differentiation and survival of inhibitory neurons in the forebrain. |
| DMP1  | dentin matrix acidic phosphoprotein 1 | This protein, which is critical for proper mineralization of bone and dentin, is present in diverse cells of bone and tooth tissues.                                                                                                                          |
| EDA   | ectodysplasin A                       | The encoded protein, which belongs to the tumor necrosis factor family, acts as a homotrimer and may be involved in cell-cell signaling during the development of ectodermal organs.                                                                          |
| FGF4  | fibroblast growth factor 4            | This gene was identified by its oncogenic transforming activity. Studies on the mouse homolog suggested a function in bone morphogenesis and limb development through the sonic hedgehog (SHH) signaling pathway.                                             |
| GLI3  | GLI family zinc finger 3              | The protein encoded by this gene localizes in the cytoplasm, activates patched Drosophila homolog (PTCH) gene expression and plays a role during embryogenesis.                                                                                               |
| JAG2  | jagged 2                              | Members of the Notch gene family encode transmembrane receptors that are critical for various cell fate decisions. The protein encoded by this gene is one of several ligands that activate Notch and related receptors.                                      |
| LAMA5 | laminin, alpha 5                      | The protein encoded by this gene belongs to the alpha subfamily of laminin chains and is a major component of basement membranes.                                                                                                                             |

|         |                                     |                                                                                                                                                                                                                                                                                                                             |
|---------|-------------------------------------|-----------------------------------------------------------------------------------------------------------------------------------------------------------------------------------------------------------------------------------------------------------------------------------------------------------------------------|
| LEF1    | lymphoid enhancer-binding factor 1  | LEF1 is a nuclear protein that is expressed in pre-B and T cells. It binds to a functionally important site in the T-cell receptor-alpha (TCRA; MIM 186880) enhancer and confers maximal enhancer activity.                                                                                                                 |
| LHX8    | LIM homeobox 8                      | Members of the LIM homeobox gene family, such as LHX8, encode transcription regulators that share common structural features. Members of the LIM homeobox gene family are required for the patterning or the specification and differentiation of different cell types during embryonic development.                        |
| MYO5A   | myosin VA (heavy chain 12, myoxin)  | Myosin V is a class of actin-based motor proteins involved in cytoplasmic vesicle transport and anchorage, spindle-pole alignment and mRNA translocation. The protein encoded by this gene is abundant in melanocytes and nerve cells.                                                                                      |
| RUNX2   | runt-related transcription factor 2 | This protein is essential for osteoblastic differentiation and skeletal morphogenesis and acts as a scaffold for nucleic acids and regulatory factors involved in skeletal gene expression.                                                                                                                                 |
| SMO     | smoothened homolog (Drosophila)     |                                                                                                                                                                                                                                                                                                                             |
| SOSTDC1 | sclerostin domain containing 1      | This protein functions as a bone morphogenetic protein (BMP) antagonist, prohibiting them from binding their receptors, so regulating BMP signaling during cellular proliferation, differentiation, and programmed cell death.                                                                                              |
| TP63    | tumor protein p63                   | This protein plays a role in the development and maintenance of stratified epithelial tissues. p63 <sup>-/-</sup> mice have several developmental defects which include the lack of limbs and other tissues, such as teeth and mammary glands, which develop as a result of interactions between mesenchyme and epithelium. |
