# Supplementary material
Source: PubMed Central journal article supplement (PMC2853178)
Supplement: NIHMS192028-supplement-Suppl_Tab_02.pdf [file NIHMS192028-supplement-Suppl_Tab_02.pdf]

**Category:**  
**Function:**  
**Annotation (p**  
**value)**

| Gene     | Name                                               | Description                                                                                                                                                                                                                        |
|----------|----------------------------------------------------|------------------------------------------------------------------------------------------------------------------------------------------------------------------------------------------------------------------------------------|
| AES      | amino-terminal enhancer of split                   | This protein is similar in sequence to a protein involved in neurogenesis during embryonic development.                                                                                                                            |
| AFG3L2   | AFG3 ATPase family gene 3-like 2 (yeast)           | This gene encodes a protein localized in mitochondria and closely related to paraplegin, which is responsible for an autosomal recessive form of hereditary spastic paraplegia.                                                    |
| AHCTF1   | AT hook containing transcription factor 1          |                                                                                                                                                                                                                                    |
| AKAP13   | A kinase (PRKA) anchor protein 13                  | This protein family is a group of structurally diverse proteins, which have the common function of binding to the regulatory subunit of protein kinase A (PKA) and confining the holoenzyme to discrete locations within the cell. |
| ALKBH3   | alkB, alkylation repair homolog 3 (E. coli)        | The Escherichia coli AlkB protein protects against the cytotoxicity of methylating agents by repair of the specific DNA lesions generated in single-stranded DNA.                                                                  |
| AP1G2    | adaptor-related protein complex 1, gamma 2 subunit | This protein along with the complex is thought to function at some trafficking step in the complex pathways between the trans-Golgi network and the cell surface.                                                                  |
| AQR      | aquarius homolog (mouse)                           |                                                                                                                                                                                                                                    |
| ARID1A   | AT rich interactive domain 1A (SWI-like)           | This gene encodes a member of the SWI/SNF family, whose members have helicase and ATPase activities and are thought to regulate transcription of certain genes by altering the chromatin structure around those genes.             |
| C19ORF50 | chromosome 19 open reading frame 50                |                                                                                                                                                                                                                                    |
| CCAR1    | cell division cycle and apoptosis regulator 1      |                                                                                                                                                                                                                                    |
| CD44     | CD44 molecule (Indian blood group)                 | This protein participates in a wide variety of cellular functions including lymphocyte activation, recirculation and homing, hematopoiesis, and tumor metastasis.                                                                  |
| CD164    | CD164 molecule, sialomucin                         | Sialomucins play 2 key but opposing roles as cytoprotective or antiadhesive agents, and as adhesion receptors. CD164 is a type I integral transmembrane sialomucin that functions as an adhesion receptor.                         |
| CEP68    | centrosomal protein 68kDa                          |                                                                                                                                                                                                                                    |
| COL5A1   | collagen, type V, alpha 1                          | Type V collagen appears to regulate the assembly of heterotypic fibers composed of both type I and type V collagen.                                                                                                                |
| CYBB     | cytochrome b-245, beta polypeptide                 | Cytochrome b (-245) has been proposed as a primary component of the microbicidal oxidase system of phagocytes.                                                                                                                     |

|         |                                                                                                    |                                                                                                                                                                                                                                                                                                                              |
|---------|----------------------------------------------------------------------------------------------------|------------------------------------------------------------------------------------------------------------------------------------------------------------------------------------------------------------------------------------------------------------------------------------------------------------------------------|
| DAG1    | dystroglycan 1 (dystrophin-associated glycoprotein 1)                                              | Dystroglycan is a laminin binding component of the dystrophin-glycoprotein complex which provides a linkage between the subsarcolemmal cytoskeleton and the extracellular matrix.                                                                                                                                            |
| DAZAP2  | DAZ associated protein 2                                                                           | This protein may function in various processes including spermatogenesis, cell signaling and transcription regulation, formation of stress granules during translation arrest, RNA splicing, and pathogenesis of multiple myeloma.                                                                                           |
| DCP2    | DCP2 decapping enzyme homolog (S. cerevisiae)                                                      | DCP2 is a key component of an mRNA-decapping complex required for removal of the 5-prime cap from mRNA prior to its degradation from the 5-prime end.                                                                                                                                                                        |
| DDX23   | DEAD (Asp-Glu-Ala-Asp) box polypeptide 23                                                          | This protein is implicated in a number of cellular processes involving alteration of RNA secondary structure, such as translation initiation, nuclear and mitochondrial splicing, and ribosome and spliceosome assembly, and is believed to be involved in embryogenesis, spermatogenesis, and cellular growth and division. |
| DNM2    | dynammin 2                                                                                         | Dynamins have been implicated in cell processes such as endocytosis and cell motility, and in alterations of the membrane that accompany certain activities such as bone resorption by osteoclasts.                                                                                                                          |
| EGFR    | epidermal growth factor receptor (erythroblastic leukemia viral (v-erb-b) oncogene homolog, avian) | Binding of this receptor to a ligand induces dimerization and tyrosine autophosphorylation and leads to cell proliferation.                                                                                                                                                                                                  |
| EP300   | E1A binding protein p300                                                                           | This protein functions as histone acetyltransferase that regulates transcription via chromatin remodeling and is important in the processes of cell proliferation and differentiation.                                                                                                                                       |
| ERCC5   | excision repair cross-complementing rodent repair deficiency, complementation group 5              | Excision repair cross-complementing rodent repair deficiency, complementation group 5 (xeroderma pigmentosum, complementation group G) is involved in excision repair of UV-induced DNA damage.                                                                                                                              |
| FAM172A | family with sequence similarity 172, member A                                                      |                                                                                                                                                                                                                                                                                                                              |
| FOXJ2   | forkhead box J2                                                                                    |                                                                                                                                                                                                                                                                                                                              |
| FXR1    | fragile X mental retardation, autosomal homolog 1                                                  | These proteins shuttle between the nucleus and cytoplasm and associate with polyribosomes, predominantly with the 60S ribosomal subunit.                                                                                                                                                                                     |
| GTF2H2  | general transcription factor IIH, polypeptide 2, 44kDa                                             | This gene encodes the 44 kDa subunit of RNA polymerase II transcription initiation factor IIH which is involved in basal transcription and nucleotide excision repair.                                                                                                                                                       |
| HDAC1   | histone deacetylase 1                                                                              | Histone acetylation and deacetylation, catalyzed by multisubunit complexes, play a key role in the regulation of eukaryotic gene expression and in cell growth and apoptosis.                                                                                                                                                |
| HMGB1   | high-mobility group box 1                                                                          |                                                                                                                                                                                                                                                                                                                              |
| HNRNPH1 | heterogeneous nuclear ribonucleoprotein H1 (H)                                                     | These proteins are associated with pre-mRNAs in the nucleus and appear to influence pre-mRNA processing and other aspects of mRNA metabolism and transport.                                                                                                                                                                  |
| HNRPDL  | heterogeneous nuclear ribonucleoprotein D-like                                                     | These proteins are associated with pre-mRNAs in the nucleus and appear to influence pre-mRNA processing and other aspects of mRNA metabolism and transport.                                                                                                                                                                  |

---

Embryonic  
Development:  
Infectious  
Disorder:  
Infectious  
Disorder of  
Embryonic Cell  
Lines (3.86E-13)

|          |                                                       |                                                                                                                                                                                                                                    |
|----------|-------------------------------------------------------|------------------------------------------------------------------------------------------------------------------------------------------------------------------------------------------------------------------------------------|
| AES      | amino-terminal enhancer of split                      | This protein is similar in sequence to a protein involved in neurogenesis during embryonic development.                                                                                                                            |
| AFG3L2   | AFG3 ATPase family gene 3-like 2 (yeast)              | This gene encodes a protein localized in mitochondria and closely related to paraplegin, which is responsible for an autosomal recessive form of hereditary spastic paraplegia.                                                    |
| AHCTF1   | AT hook containing transcription factor 1             |                                                                                                                                                                                                                                    |
| AKAP13   | A kinase (PRKA) anchor protein 13                     | This protein family is a group of structurally diverse proteins, which have the common function of binding to the regulatory subunit of protein kinase A (PKA) and confining the holoenzyme to discrete locations within the cell. |
| ALKBH3   | alkB, alkylation repair homolog 3 (E. coli)           | The Escherichia coli AlkB protein protects against the cytotoxicity of methylating agents by repair of the specific DNA lesions generated in single-stranded DNA.                                                                  |
| AP1G2    | adaptor-related protein complex 1, gamma 2 subunit    | This protein along with the complex is thought to function at some trafficking step in the complex pathways between the trans-Golgi network and the cell surface.                                                                  |
| AQR      | aquarius homolog (mouse)                              |                                                                                                                                                                                                                                    |
| ARID1A   | AT rich interactive domain 1A (SWI-like)              | This protein is thought to regulate transcription of certain genes by altering the chromatin structure around those genes.                                                                                                         |
| C19ORF50 | chromosome 19 open reading frame 50                   |                                                                                                                                                                                                                                    |
| CCAR1    | cell division cycle and apoptosis regulator 1         |                                                                                                                                                                                                                                    |
| CD164    | CD164 molecule, sialomucin                            | Sialomucins play 2 key but opposing roles as cytoprotective or antiadhesive agents, and as adhesion receptors. CD164 is a type I integral transmembrane sialomucin that functions as an adhesion receptor.                         |
| CEP68    | centrosomal protein 68kDa                             |                                                                                                                                                                                                                                    |
| COL5A1   | collagen, type V, alpha 1                             | Type V collagen appears to regulate the assembly of heterotypic fibers composed of both type I and type V collagen.                                                                                                                |
| CYBB     | cytochrome b-245, beta polypeptide                    | Cytochrome b (-245) has been proposed as a primary component of the microbicidal oxidase system of phagocytes.                                                                                                                     |
| DAG1     | dystroglycan 1 (dystrophin-associated glycoprotein 1) | Dystroglycan is a laminin binding component of the dystrophin-glycoprotein complex which provides a linkage between the subsarcolemmal cytoskeleton and the extracellular matrix.                                                  |
| DAZAP2   | DAZ associated protein 2                              | This protein may function in various processes including spermatogenesis, cell signaling and transcription regulation, formation of stress granules during translation arrest, RNA splicing, and pathogenesis of multiple myeloma. |

|         |                                                                                       |                                                                                                                                                                                                                                                                                                                              |
|---------|---------------------------------------------------------------------------------------|------------------------------------------------------------------------------------------------------------------------------------------------------------------------------------------------------------------------------------------------------------------------------------------------------------------------------|
| DCP2    | DCP2 decapping enzyme homolog ( <i>S. cerevisiae</i> )                                | DCP2 is a key component of an mRNA-decapping complex required for removal of the 5-prime cap from mRNA prior to its degradation from the 5-prime end .                                                                                                                                                                       |
| DDX23   | DEAD (Asp-Glu-Ala-Asp) box polypeptide 23                                             | This protein is implicated in a number of cellular processes involving alteration of RNA secondary structure, such as translation initiation, nuclear and mitochondrial splicing, and ribosome and spliceosome assembly, and is believed to be involved in embryogenesis, spermatogenesis, and cellular growth and division. |
| DNM2    | dynammin 2                                                                            | Dynamins have been implicated in cell processes such as endocytosis and cell motility, and in alterations of the membrane that accompany certain activities such as bone resorption by osteoclasts.                                                                                                                          |
| EP300   | E1A binding protein p300                                                              | This protein functions as histone acetyltransferase that regulates transcription via chromatin remodeling and is important in the processes of cell proliferation and differentiation.                                                                                                                                       |
| ERCC5   | excision repair cross-complementing rodent repair deficiency, complementation group 5 | Excision repair cross-complementing rodent repair deficiency, complementation group 5 (xeroderma pigmentosum, complementation group G) is involved in excision repair of UV-induced DNA damage.                                                                                                                              |
| FAM172A | family with sequence similarity 172, member A                                         |                                                                                                                                                                                                                                                                                                                              |
| FOXJ2   | forkhead box J2                                                                       |                                                                                                                                                                                                                                                                                                                              |
| FXR1    | fragile X mental retardation, autosomal homolog 1                                     | These proteins shuttle between the nucleus and cytoplasm and associate with polyribosomes, predominantly with the 60S ribosomal subunit.                                                                                                                                                                                     |
| GTF2H2  | general transcription factor IIH, polypeptide 2, 44kDa                                | This gene encodes the 44 kDa subunit of RNA polymerase II transcription initiation factor IIH which is involved in basal transcription and nucleotide excision repair.                                                                                                                                                       |
| HDAC1   | histone deacetylase 1                                                                 | Histone acetylation and deacetylation, catalyzed by multisubunit complexes, play a key role in the regulation of eukaryotic gene expression and in cell growth and apoptosis.                                                                                                                                                |
| HMGB1   | high-mobility group box 1                                                             |                                                                                                                                                                                                                                                                                                                              |
| HNRNPH1 | heterogeneous nuclear ribonucleoprotein H1 (H)                                        | These proteins are associated with pre-mRNAs in the nucleus and appear to influence pre-mRNA processing and other aspects of mRNA metabolism and transport.                                                                                                                                                                  |
| HNRPDL  | heterogeneous nuclear ribonucleoprotein D-like                                        | These proteins are associated with pre-mRNAs in the nucleus and appear to influence pre-mRNA processing and other aspects of mRNA metabolism and transport.                                                                                                                                                                  |
| KARS    | lysyl-tRNA synthetase                                                                 | Aminoacyl-tRNA synthetases are a class of enzymes that charge tRNAs with their cognate amino acids.                                                                                                                                                                                                                          |

Embryonic  
Development:  
Vascularization:  
Vascularization  
of  
Extraembryonic  
Tissue (5.06E-  
04)

|      |                                                |                                                                                                                                             |
|------|------------------------------------------------|---------------------------------------------------------------------------------------------------------------------------------------------|
| ARNT | aryl hydrocarbon receptor nuclear translocator | This protein forms a complex with the ligand-bound Ah receptor, and is required for receptor function.                                      |
| BRAF | v-raf murine sarcoma viral oncogene homolog B1 | This protein plays a role in regulating the MAP kinase/ERKs signaling pathway, which affects cell division, differentiation, and secretion. |

|         |                                                                                  |                                                                                                                                                                                                                                                                                      |
|---------|----------------------------------------------------------------------------------|--------------------------------------------------------------------------------------------------------------------------------------------------------------------------------------------------------------------------------------------------------------------------------------|
| CEACAM1 | carcinoembryonic antigen-related cell adhesion molecule 1 (biliary glycoprotein) | Multiple cellular activities have been attributed to this protein, including roles in the differentiation and arrangement of tissue three-dimensional structure, angiogenesis, apoptosis, tumor suppression, metastasis, and the modulation of innate and adaptive immune responses. |
| ICAM1   | intercellular adhesion molecule 1                                                | This gene encodes a cell surface glycoprotein which is typically expressed on endothelial cells and cells of the immune system.                                                                                                                                                      |
| ITGB8   | integrin, beta 8                                                                 | Integrin complexes mediate cell-cell and cell-extracellular matrix interactions and this complex plays a role in human airway epithelial proliferation.                                                                                                                              |
| MAP3K3  | mitogen-activated protein kinase kinase kinase 3                                 | This protein directly regulates the stress-activated protein kinase (SAPK) and extracellular signal-regulated protein kinase (ERK) pathways by activating SEK and MEK1/2 respectively.                                                                                               |
| NRP2    | neuropilin 2                                                                     | The encoded transmembrane protein binds to SEMA3C protein and SEMA3F protein, and interacts with vascular endothelial growth factor (VEGF). This protein may play a role in cardiovascular development, axon guidance, and tumorigenesis.                                            |

Embryonic  
Development:  
Cell Death: Cell  
Death of  
Embryonic Cell  
Lines (9.34E-04)

|       |                                                     |                                                                                                                                                                                                                                         |
|-------|-----------------------------------------------------|-----------------------------------------------------------------------------------------------------------------------------------------------------------------------------------------------------------------------------------------|
| AKT1  | v-akt murine thymoma viral oncogene homolog 1       | In the developing nervous system AKT is a critical mediator of growth factor-induced neuronal survival. Survival factors can suppress apoptosis.                                                                                        |
| BAG4  | BCL2-associated athanogene 4                        | This protein regulates downstream cell death signaling. The regulatory role of this protein in cell death was demonstrated in epithelial cells which undergo apoptosis while integrin mediated matrix contacts are lost.                |
| BAX   | BCL2-associated X protein                           | This protein forms a heterodimer with BCL2, and functions as an apoptotic activator.                                                                                                                                                    |
| BID   | BH3 interacting domain death agonist                | This gene encodes a death agonist that heterodimerizes with either agonist BAX or antagonist BCL2.                                                                                                                                      |
| CASP2 | caspase 2, apoptosis-related cysteine peptidase     | Sequential activation of caspases plays a central role in the execution-phase of cell apoptosis.                                                                                                                                        |
| CASP7 | caspase 7, apoptosis-related cysteine peptidase     | Sequential activation of caspases plays a central role in the execution-phase of cell apoptosis.                                                                                                                                        |
| CD44  | CD44 molecule (Indian blood group)                  | This protein participates in a wide variety of cellular functions including lymphocyte activation, recirculation and homing, hematopoiesis, and tumor metastasis.                                                                       |
| CDC42 | cell division cycle 42 (GTP binding protein, 25kDa) | This protein regulates signaling pathways that control diverse cellular functions including cell morphology, migration, endocytosis and cell cycle progression.                                                                         |
| CFLAR | CASP8 and FADD-like apoptosis regulator             |                                                                                                                                                                                                                                         |
| DAXX  | death-domain associated protein                     | In the nucleus, this protein functions as a potent transcription repressor that binds to sumoylated transcription factors, and may function to regulate apoptosis.                                                                      |
| DCTN2 | dynactin 2 (p50)                                    | This protein is involved in a diverse array of cellular functions, including ER-to-Golgi transport, the centripetal movement of lysosomes and endosomes, spindle formation, chromosome movement, nuclear positioning, and axonogenesis. |

|          |                                                                      |                                                                                                                                                                                                                                                                                                                                              |
|----------|----------------------------------------------------------------------|----------------------------------------------------------------------------------------------------------------------------------------------------------------------------------------------------------------------------------------------------------------------------------------------------------------------------------------------|
| ECOP     | EGFR-coamplified and overexpressed protein                           |                                                                                                                                                                                                                                                                                                                                              |
| FADD     | Fas (TNFRSF6)-associated via death domain                            | The protein encoded by this gene is an adaptor molecule that interacts with various cell surface receptors and mediates cell apoptotic signals.                                                                                                                                                                                              |
| FAS      | Fas (TNF receptor superfamily, member 6)                             | This protein has been shown to play a central role in the physiological regulation of programmed cell death, and has been implicated in the pathogenesis of various malignancies and diseases of the immune system. This receptor is found to be involved in transducing the proliferating signals in normal diploid fibroblast and T cells. |
| IFNAR1   | interferon (alpha, beta and omega) receptor 1                        | Binding and activation of this receptor stimulates Janus protein kinases, it also functions as an antiviral factor.                                                                                                                                                                                                                          |
| IRF1     | interferon regulatory factor 1                                       | IRF1 is a transcription activator of genes induced by interferons alpha, beta, and gamma. It also plays roles in regulating apoptosis and tumor-suppression.                                                                                                                                                                                 |
| LYN      | v-yes-1 Yamaguchi sarcoma viral related oncogene homolog             |                                                                                                                                                                                                                                                                                                                                              |
| MAP3K5   | mitogen-activated protein kinase kinase kinase 5                     | Mitogen-activated protein kinase (MAPK) signaling cascades include MAPK or extracellular signal-regulated kinase (ERK), MAPK kinase (MKK or MEK), and MAPK kinase kinase (MAPKKK or MEKK). MAPKK kinase/MEKK phosphorylates and activates its downstream protein kinase, MAPK kinase/MEK, which in turn activates MAPK.                      |
| MCL1     | myeloid cell leukemia sequence 1 (BCL2-related)                      | The longer gene product (isoform 1) enhances cell survival by inhibiting apoptosis while the alternatively spliced shorter gene product (isoform 2) promotes apoptosis and is death-inducing.                                                                                                                                                |
| NFKB1    | nuclear factor of kappa light polypeptide gene enhancer in B-cells 1 | NFKB is a transcription regulator that is activated by various intra- and extra-cellular stimuli such as cytokines, oxidant-free radicals, ultraviolet irradiation, and bacterial or viral products.                                                                                                                                         |
| PAK2     | p21 protein (Cdc42/Rac)-activated kinase 2                           | This protein is activated by proteolytic cleavage during caspase-mediated apoptosis, and may play a role in regulating the apoptotic events in the dying cell.                                                                                                                                                                               |
| PEA15    | phosphoprotein enriched in astrocytes 15                             | PEA15 is a death effector domain (DED)-containing protein predominantly expressed in the central nervous system, particularly in astrocytes.                                                                                                                                                                                                 |
| PIAS1    | protein inhibitor of activated STAT, 1                               | This protein functions in testis as a nuclear receptor transcriptional coregulator and may have a role in AR initiation and maintenance of spermatogenesis.                                                                                                                                                                                  |
| PPP1R15A | protein phosphatase 1, regulatory (inhibitor) subunit 15A            | This gene is a member of a group of genes whose transcript levels are increased following stressful growth arrest conditions and treatment with DNA-damaging agents.                                                                                                                                                                         |
| PRKAA1   | protein kinase, AMP-activated, alpha 1 catalytic subunit             | This protein protects cells from stresses that cause ATP depletion by switching off ATP-consuming biosynthetic pathways.                                                                                                                                                                                                                     |
| PRMT2    | protein arginine methyltransferase 2                                 |                                                                                                                                                                                                                                                                                                                                              |
| RASSF1   | Ras association (RalGDS/AF-6) domain family member 1                 | This protein was shown to inhibit the accumulation of cyclin D1, and thus induce cell cycle arrest.                                                                                                                                                                                                                                          |

|       |                                                         |                                                                                                                                                                                                                                     |
|-------|---------------------------------------------------------|-------------------------------------------------------------------------------------------------------------------------------------------------------------------------------------------------------------------------------------|
| RIPK1 | receptor (TNFRSF)-interacting serine-threonine kinase 1 |                                                                                                                                                                                                                                     |
| SPP1  | secreted phosphoprotein 1                               |                                                                                                                                                                                                                                     |
| STK4  | serine/threonine kinase 4                               | The particular phosphorylation catalyzed by this protein has been correlated with apoptosis, and it's possible that this protein induces the chromatin condensation observed in this process.                                       |
| TFRC  | transferrin receptor (p90, CD71)                        |                                                                                                                                                                                                                                     |
| TLR1  | toll-like receptor 1                                    | Toll-like receptors recognize pathogen-associated molecular patterns (PAMPs) that are expressed on infectious agents, and mediate the production of cytokines necessary for the development of effective immunity.                  |
| TLR2  | toll-like receptor 2                                    | This protein encoded by this gene is a member of the Toll-like receptor (TLR) family which plays a fundamental role in pathogen recognition and activation of innate immunity. It mediates host response to Gram-positive bacteria. |

Embryonic Development: Apoptosis: Apoptosis of Embryonic Cell Lines (1.17E-03)

|       |                                                 |                                                                                                                                                                                                                                                                                                                                              |
|-------|-------------------------------------------------|----------------------------------------------------------------------------------------------------------------------------------------------------------------------------------------------------------------------------------------------------------------------------------------------------------------------------------------------|
| AKT1  | v-akt murine thymoma viral oncogene homolog 1   | In the developing nervous system AKT is a critical mediator of growth factor-induced neuronal survival. Survival factors can suppress apoptosis.                                                                                                                                                                                             |
| BAX   | BCL2-associated X protein                       | This protein forms a heterodimer with BCL2, and functions as an apoptotic activator.                                                                                                                                                                                                                                                         |
| BID   | BH3 interacting domain death agonist            | This gene encodes a death agonist that heterodimerizes with either agonist BAX or antagonist BCL2.                                                                                                                                                                                                                                           |
| CASP2 | caspase 2, apoptosis-related cysteine peptidase | Sequential activation of caspases plays a central role in the execution-phase of cell apoptosis.                                                                                                                                                                                                                                             |
| CD44  | CD44 molecule (Indian blood group)              | This protein participates in a wide variety of cellular functions including lymphocyte activation, recirculation and homing, hematopoiesis, and tumor metastasis.                                                                                                                                                                            |
| CFLAR | CASP8 and FADD-like apoptosis regulator         |                                                                                                                                                                                                                                                                                                                                              |
| DAXX  | death-domain associated protein                 | In the nucleus, this protein functions as a potent transcription repressor that binds to sumoylated transcription factors, and may function to regulate apoptosis.                                                                                                                                                                           |
| ECOP  | EGFR-coamplified and overexpressed protein      |                                                                                                                                                                                                                                                                                                                                              |
| FADD  | Fas (TNFRSF6)-associated via death domain       | The protein encoded by this gene is an adaptor molecule that interacts with various cell surface receptors and mediates cell apoptotic signals.                                                                                                                                                                                              |
| FAS   | Fas (TNF receptor superfamily, member 6)        | This protein has been shown to play a central role in the physiological regulation of programmed cell death, and has been implicated in the pathogenesis of various malignancies and diseases of the immune system. This receptor is found to be involved in transducing the proliferating signals in normal diploid fibroblast and T cells. |
| IRF1  | interferon regulatory factor 1                  | IRF1 is a transcription activator of genes induced by interferons alpha, beta, and gamma. It also plays roles in regulating apoptosis and tumor-suppression.                                                                                                                                                                                 |

|          |                                                           |                                                                                                                                                                                                                                                                                                                         |
|----------|-----------------------------------------------------------|-------------------------------------------------------------------------------------------------------------------------------------------------------------------------------------------------------------------------------------------------------------------------------------------------------------------------|
| LYN      | v-src-1 Yamaguchi sarcoma viral related oncogene homolog  |                                                                                                                                                                                                                                                                                                                         |
| MAP3K5   | mitogen-activated protein kinase kinase kinase 5          | Mitogen-activated protein kinase (MAPK) signaling cascades include MAPK or extracellular signal-regulated kinase (ERK), MAPK kinase (MKK or MEK), and MAPK kinase kinase (MAPKKK or MEKK). MAPKK kinase/MEKK phosphorylates and activates its downstream protein kinase, MAPK kinase/MEK, which in turn activates MAPK. |
| MCL1     | myeloid cell leukemia sequence 1 (BCL2-related)           | The longer gene product (isoform 1) enhances cell survival by inhibiting apoptosis while the alternatively spliced shorter gene product (isoform 2) promotes apoptosis and is death-inducing.                                                                                                                           |
| PAK2     | p21 protein (Cdc42/Rac)-activated kinase 2                | This protein is activated by proteolytic cleavage during caspase-mediated apoptosis, and may play a role in regulating the apoptotic events in the dying cell.                                                                                                                                                          |
| PEA15    | phosphoprotein enriched in astrocytes 15                  | PEA15 is a death effector domain (DED)-containing protein predominantly expressed in the central nervous system, particularly in astrocytes.                                                                                                                                                                            |
| PIAS1    | protein inhibitor of activated STAT, 1                    | This protein functions in testis as a nuclear receptor transcriptional coregulator and may have a role in AR initiation and maintenance of spermatogenesis.                                                                                                                                                             |
| PPP1R15A | protein phosphatase 1, regulatory (inhibitor) subunit 15A | This gene is a member of a group of genes whose transcript levels are increased following stressful growth arrest conditions and treatment with DNA-damaging agents.                                                                                                                                                    |
| PRKAA1   | protein kinase, AMP-activated, alpha 1 catalytic subunit  | This protein protects cells from stresses that cause ATP depletion by switching off ATP-consuming biosynthetic pathways.                                                                                                                                                                                                |
| PRMT2    | protein arginine methyltransferase 2                      |                                                                                                                                                                                                                                                                                                                         |
| RIPK1    | receptor (TNFRSF)-interacting serine-threonine kinase 1   |                                                                                                                                                                                                                                                                                                                         |
| SPP1     | secreted phosphoprotein 1                                 |                                                                                                                                                                                                                                                                                                                         |
| STK4     | serine/threonine kinase 4                                 | The particular phosphorylation catalyzed by this protein has been correlated with apoptosis, and it's possible that this protein induces the chromatin condensation observed in this process.                                                                                                                           |
| TFRC     | transferrin receptor (p90, CD71)                          |                                                                                                                                                                                                                                                                                                                         |
| TLR1     | toll-like receptor 1                                      | Toll-like receptors recognize pathogen-associated molecular patterns (PAMPs) that are expressed on infectious agents, and mediate the production of cytokines necessary for the development of effective immunity.                                                                                                      |
| TLR2     | toll-like receptor 2                                      | This protein encoded by this gene is a member of the Toll-like receptor (TLR) family which plays a fundamental role in pathogen recognition and activation of innate immunity. It mediates host response to Gram-positive bacteria.                                                                                     |
| TP53     | tumor protein p53                                         | This gene encodes tumor protein p53, which responds to diverse cellular stresses to regulate target genes that induce cell cycle arrest, apoptosis, senescence, DNA repair, or changes in metabolism.                                                                                                                   |
| TP53INP1 | tumor protein p53 inducible nuclear protein 1             |                                                                                                                                                                                                                                                                                                                         |
| TXNDC1   | thioredoxin-related transmembrane protein 1               | TXNDC1 is a thioredoxin (TXN; see MIM 187700)-related protein with disulfide reductase activity.                                                                                                                                                                                                                        |

|                                                                                                          |               |                                                                                                                                 |                                                                                                                                                                                                                                         |
|----------------------------------------------------------------------------------------------------------|---------------|---------------------------------------------------------------------------------------------------------------------------------|-----------------------------------------------------------------------------------------------------------------------------------------------------------------------------------------------------------------------------------------|
|                                                                                                          | UXT           | ubiquitously-expressed transcript                                                                                               | This gene plays a role in facilitating receptor-induced transcriptional activation. It is also likely to be involved in tumorigenesis as it is abundantly expressed in tumor tissues.                                                   |
| Hematological System Development and Function and Hematopoiesis: Hematopoiesis: Hematopoiesis (1.30E-07) | ADAM17        | ADAM metallopeptidase domain 17                                                                                                 | This protein functions as a tumor necrosis factor-alpha converting enzyme; binds mitotic arrest deficient 2 protein, and also plays a prominent role in the activation of the Notch signaling pathway.                                  |
|                                                                                                          | ADAR          | adenosine deaminase, RNA-specific                                                                                               | This gene encodes the enzyme responsible for RNA editing by site-specific deamination of adenosines.                                                                                                                                    |
|                                                                                                          | AKT1          | v-akt murine thymoma viral oncogene homolog 1                                                                                   | In the developing nervous system AKT is a critical mediator of growth factor-induced neuronal survival. Survival factors can suppress apoptosis.                                                                                        |
|                                                                                                          | AKT2          | v-akt murine thymoma viral oncogene homolog 2                                                                                   | This gene is a putative oncogene encoding a subfamily of serine/threonine kinases containing SH2-like (Src homology 2-like) domains. The encoded protein is a general protein kinase capable of phosphorylating several known proteins. |
|                                                                                                          | AP3B1         | adaptor-related protein complex 3, beta 1 subunit                                                                               | This gene encodes a protein that may play a role in organelle biogenesis associated with melanosomes, platelet dense granules, and lysosomes.                                                                                           |
|                                                                                                          | AP3D1         | adaptor-related protein complex 3, delta 1 subunit                                                                              | The AP3D1 subunit is implicated in intracellular biogenesis and trafficking of pigment granules and platelet dense granules and neurotransmitter vesicles.                                                                              |
|                                                                                                          | APAF1         | apoptotic peptidase activating factor 1                                                                                         | This gene encodes a cytoplasmic protein that initiates apoptosis.                                                                                                                                                                       |
|                                                                                                          | B2M           | beta-2-microglobulin                                                                                                            | Beta-2-microglobulin is a serum protein found in association with the major histocompatibility complex (MHC) class I heavy chain on the surface of nearly all nucleated cells.                                                          |
|                                                                                                          | BAX           | BCL2-associated X protein                                                                                                       | This protein forms a heterodimer with BCL2, and functions as an apoptotic activator.                                                                                                                                                    |
|                                                                                                          | BSG           | basigin (Ok blood group)                                                                                                        | This protein is a plasma membrane protein that is important in spermatogenesis, embryo implantation, neural network formation, and tumor progression.                                                                                   |
|                                                                                                          | CCL3          | chemokine (C-C motif) ligand 3                                                                                                  | Macrophage inflammatory protein-1 is a so-called monokine that is involved in the acute inflammatory state in the recruitment and activation of polymorphonuclear leukocytes.                                                           |
|                                                                                                          | CCL4          | chemokine (C-C motif) ligand 4                                                                                                  |                                                                                                                                                                                                                                         |
|                                                                                                          | CCND1         | cyclin D1                                                                                                                       | This cyclin is required for cell cycle G1/S transition. It interacts with tumor suppressor protein Rb and the expression of this gene is regulated positively by Rb.                                                                    |
|                                                                                                          | CD44          | CD44 molecule (Indian blood group)                                                                                              | This protein participates in a wide variety of cellular functions including lymphocyte activation, recirculation and homing, hematopoiesis, and tumor metastasis.                                                                       |
|                                                                                                          | CD69          | CD69 molecule                                                                                                                   | Expression of this protein is induced upon activation of T lymphocytes, and may play a role in proliferation. It may act to transmit signals in natural killer cells and platelets.                                                     |
| CD81                                                                                                     | CD81 molecule | This protein appears to promote muscle cell fusion and support myotube maintenance, and may be involved in signal transduction. |                                                                                                                                                                                                                                         |

|         |                                                                                                    |                                                                                                                                                                                                                                                                                                                                              |
|---------|----------------------------------------------------------------------------------------------------|----------------------------------------------------------------------------------------------------------------------------------------------------------------------------------------------------------------------------------------------------------------------------------------------------------------------------------------------|
| CD83    | CD83 molecule                                                                                      |                                                                                                                                                                                                                                                                                                                                              |
| CDC2L5  | cell division cycle 2-like 5 (cholinesterase-related cell division controller)                     | The proteins of this family are well known for their essential roles as master switches in cell cycle control. They may also be involved in neurocytoskeleton dynamics. The exact function of this protein has not yet been determined.                                                                                                      |
| CDKN2A  | cyclin-dependent kinase inhibitor 2A (melanoma, p16, inhibits CDK4)                                | This ARF product functions as a stabilizer of the tumor suppressor protein p53 as it can interact with, and sequester, MDM1, a protein responsible for the degradation of p53. It has a common functionality in cell cycle G1 control.                                                                                                       |
| CEBPD   | CCAAT/enhancer binding protein (C/EBP), delta                                                      | This protein is important in the regulation of genes involved in immune and inflammatory responses, and may be involved in the regulation of genes associated with activation and/or differentiation of macrophages.                                                                                                                         |
| CHD4    | chromodomain helicase DNA binding protein 4                                                        | This protein is the main component of the nucleosome remodeling and deacetylase complex and plays an important role in epigenetic transcriptional repression.                                                                                                                                                                                |
| CREB1   | cAMP responsive element binding protein 1                                                          | This protein induces transcription of genes in response to hormonal stimulation of the cAMP pathway.                                                                                                                                                                                                                                         |
| CTBP1   | C-terminal binding protein 1                                                                       | This proteins can interact with a polycomb group protein complex which participates in regulation of gene expression during development.                                                                                                                                                                                                     |
| CXCR4   | chemokine (C-X-C motif) receptor 4                                                                 | This protein acts with the CD4 protein to support HIV entry into cells and is also highly expressed in breast cancer cells.                                                                                                                                                                                                                  |
| DCLRE1C | DNA cross-link repair 1C (PSO2 homolog, <i>S. cerevisiae</i> )                                     | This nuclear protein is involved in V(D)J recombination and DNA repair.                                                                                                                                                                                                                                                                      |
| DICER1  | dicer 1, ribonuclease type III                                                                     | This ribonuclease is required by the RNA interference and small temporal RNA pathways to produce the active small RNA component that represses gene expression.                                                                                                                                                                              |
| EGFR    | epidermal growth factor receptor (erythroblastic leukemia viral (v-erb-b) oncogene homolog, avian) | Binding of this receptor to a ligand induces dimerization and tyrosine autophosphorylation and leads to cell proliferation.                                                                                                                                                                                                                  |
| EGR1    | early growth response 1                                                                            | This protein is a transcriptional regulator required for differentiation and mitogenesis.                                                                                                                                                                                                                                                    |
| ETV6    | ets variant 6                                                                                      | This gene encodes an ETS family transcription factor that it is required for hematopoiesis and maintenance of the developing vascular network.                                                                                                                                                                                               |
| FADD    | Fas (TNFRSF6)-associated via death domain                                                          | The protein encoded by this gene is an adaptor molecule that interacts with various cell surface receptors and mediates cell apoptotic signals.                                                                                                                                                                                              |
| FAS     | Fas (TNF receptor superfamily, member 6)                                                           | This protein has been shown to play a central role in the physiological regulation of programmed cell death, and has been implicated in the pathogenesis of various malignancies and diseases of the immune system. This receptor is found to be involved in transducing the proliferating signals in normal diploid fibroblast and T cells. |
| FCGR2A  | Fc fragment of IgG, low affinity IIa, receptor (CD32)                                              | This protein is a cell surface receptor found on phagocytic cells such as macrophages and neutrophils, and is involved in the process of phagocytosis and clearing of immune complexes.                                                                                                                                                      |
| FOS     | v-fos FBJ murine osteosarcoma viral oncogene homolog                                               | The FOS proteins have been implicated as regulators of cell proliferation, differentiation, transformation, and apoptotic cell death.                                                                                                                                                                                                        |

|          |                                                                  |                                                                                                                                                                                                                                                               |
|----------|------------------------------------------------------------------|---------------------------------------------------------------------------------------------------------------------------------------------------------------------------------------------------------------------------------------------------------------|
| FUS      | fusion (involved in t(12;16) in malignant liposarcoma)           |                                                                                                                                                                                                                                                               |
| GRB2     | growth factor receptor-bound protein 2                           | The protein may be involved in the signal transduction pathway.                                                                                                                                                                                               |
| HDAC5    | histone deacetylase 5                                            | This protein possesses histone deacetylase activity and represses transcription when tethered to a promoter.                                                                                                                                                  |
| HDAC7    | histone deacetylase 7                                            | This gene is orthologous to mouse HDAC7 gene whose protein promotes repression mediated via the transcriptional corepressor SMRT.                                                                                                                             |
| HSP90AA1 | heat shock protein 90kDa alpha (cytosolic), class A member 1     | HSP90 proteins are molecular chaperones that have key roles in signal transduction, protein folding, protein degradation, and morphologic evolution.                                                                                                          |
| HSP90B1  | heat shock protein 90kDa beta (Grp94), member 1                  | HSP90 proteins play roles in folding newly synthesized proteins or stabilizing and refolding denatured proteins after stress.                                                                                                                                 |
| HSPD1    | heat shock 60kDa protein 1 (chaperonin)                          | This protein may function as a signaling molecule in the innate immune system. It is essential for the folding and assembly of newly imported proteins in the mitochondria.                                                                                   |
| ICAM1    | intercellular adhesion molecule 1                                | This gene encodes a cell surface glycoprotein which is typically expressed on endothelial cells and cells of the immune system.                                                                                                                               |
| ICOSLG   | inducible T-cell co-stimulator ligand                            |                                                                                                                                                                                                                                                               |
| IFNAR1   | interferon (alpha, beta and omega) receptor 1                    | Binding and activation of this receptor stimulates Janus protein kinases, it also functions as an antiviral factor.                                                                                                                                           |
| IFNGR1   | interferon gamma receptor 1                                      | This gene encodes the ligand-binding chain (alpha) of the gamma interferon receptor.                                                                                                                                                                          |
| IGF2     | insulin-like growth factor 2 (somatomedin A)                     | This gene encodes a member of the insulin family of polypeptide growth factors that is involved in development and growth.                                                                                                                                    |
| IGF2R    | insulin-like growth factor 2 receptor                            | This receptor functions in the intracellular trafficking of lysosomal enzymes, the activation of transforming growth factor beta, and the degradation of IGF2.                                                                                                |
| IL2RG    | interleukin 2 receptor, gamma (severe combined immunodeficiency) | The interleukin 2 (IL2) receptor gamma chain (IL2RG), an important signalling component of many interleukin receptors (IL2,IL4,IL7,IL9, and IL15).                                                                                                            |
| IL4R     | interleukin 4 receptor                                           | This protein can bind interleukin 4 to promote differentiation of Th2 cells, can be produced by an alternate splice variant or by proteolysis of the membrane-bound protein, and can inhibit IL4-mediated cell proliferation and IL5 upregulation by T-cells. |
| IL6R     | interleukin 6 receptor                                           | Interleukin 6 (IL6) is a potent pleiotropic cytokine that regulates cell growth and differentiation and plays an important role in immune response.                                                                                                           |
| IL7R     | interleukin 7 receptor                                           | This protein has been shown to play a critical role in the V(D)J recombination during lymphocyte development, and to control the accessibility of the TCR gamma locus by STAT5 and histone acetylation.                                                       |
| IRF1     | interferon regulatory factor 1                                   | IRF1 is a transcription activator of genes induced by interferons alpha, beta, and gamma. It also plays roles in regulating apoptosis and tumor-suppression.                                                                                                  |
| IRF2     | interferon regulatory factor 2                                   | IRF2 competitively inhibits the IRF1-mediated transcriptional activation of interferons alpha and beta, and presumably other genes that employ IRF1 for transcription activation. However, IRF2 also functions as a transcriptional activator of histone H4.  |

|        |                                                                            |                                                                                                                                                                                                                                                                                                                              |
|--------|----------------------------------------------------------------------------|------------------------------------------------------------------------------------------------------------------------------------------------------------------------------------------------------------------------------------------------------------------------------------------------------------------------------|
| ITGB2  | integrin, beta 2 (complement component 3 receptor 3 and 4 subunit)         | Integrins are known to participate in cell adhesion as well as cell-surface mediated signalling.                                                                                                                                                                                                                             |
| JAK1   | Janus kinase 1                                                             | JAK1 is involved in the interferon-alpha/beta and -gamma signal transduction pathways. These kinases couple cytokine ligand binding to tyrosine phosphorylation of various known signaling proteins and of a unique family of transcription factors termed the signal transducers and activators of transcription, or STATs. |
| JMJD6  | jumonji domain containing 6                                                | JmjC domain-containing proteins are predicted to function as protein hydroxylases or histone demethylases.                                                                                                                                                                                                                   |
| JUN    | jun oncogene                                                               | This protein interacts directly with specific target DNA sequences to regulate gene expression.                                                                                                                                                                                                                              |
| LAMP1  | lysosomal-associated membrane protein 1                                    | This glycoprotein provides selectins with carbohydrate ligands, and may play a role in tumor cell metastasis.                                                                                                                                                                                                                |
| LCN2   | lipocalin 2                                                                |                                                                                                                                                                                                                                                                                                                              |
| LYN    | v-yes-1 Yamaguchi sarcoma viral related oncogene homolog                   |                                                                                                                                                                                                                                                                                                                              |
| MAFB   | v-maf musculoaponeurotic fibrosarcoma oncogene homolog B (avian)           | This protein plays an important role in the regulation of lineage-specific hematopoiesis. It represses ETS1-mediated transcription of erythroid-specific genes in myeloid cells.                                                                                                                                             |
| MAP3K7 | mitogen-activated protein kinase kinase kinase 7                           | This kinase mediates the signaling transduction induced by TGF beta and morphogenetic protein (BMP), and controls a variety of cell functions including transcription regulation and apoptosis. This kinase can play a role in the cell response to environmental stresses.                                                  |
| MAPK14 | mitogen-activated protein kinase 14                                        | This kinase may be involved in stress related transcription and cell cycle regulation, as well as in genotoxic stress response.                                                                                                                                                                                              |
| MCL1   | myeloid cell leukemia sequence 1 (BCL2-related)                            | The longer gene product (isoform 1) enhances cell survival by inhibiting apoptosis while the alternatively spliced shorter gene product (isoform 2) promotes apoptosis and is death-inducing.                                                                                                                                |
| MDM2   | Mdm2 p53 binding protein homolog (mouse)                                   | This protein is a nuclear phosphoprotein that binds and inhibits transactivation by tumor protein p53, as part of an autoregulatory negative feedback loop. It also affects the cell cycle, apoptosis, and tumorigenesis through interactions with other proteins, including retinoblastoma 1 and ribosomal protein L5.      |
| MDM4   | Mdm4 p53 binding protein homolog (mouse)                                   | This protein plays a role in apoptosis.                                                                                                                                                                                                                                                                                      |
| MED1   | mediator complex subunit 1                                                 | The protein encoded by this gene is a subunit of the CRSP (cofactor required for SP1 activation) complex, which, along with TFIID, is required for efficient activation by SP1. It also regulates p53-dependent apoptosis and it is essential for adipogenesis.                                                              |
| MEIS1  | Meis homeobox 1                                                            | Homeobox genes, of which the most well-characterized category is represented by the HOX genes, play a crucial role in normal development. In addition, several homeoproteins are involved in neoplasia.                                                                                                                      |
| MLL    | myeloid/lymphoid or mixed-lineage leukemia (trithorax homolog, Drosophila) | The MLL gene encodes a DNA-binding protein that methylates histone H3 (see MIM 601128) lys4 (H3K4) and positively regulates expression of target genes, including multiple HOX genes (see MIM 142980).                                                                                                                       |

|        |                                                                                                 |                                                                                                                                                                                                                                                                           |
|--------|-------------------------------------------------------------------------------------------------|---------------------------------------------------------------------------------------------------------------------------------------------------------------------------------------------------------------------------------------------------------------------------|
| MLLT1  | myeloid/lymphoid or mixed-lineage leukemia (trithorax homolog, Drosophila); translocated to, 1  |                                                                                                                                                                                                                                                                           |
| MLLT10 | myeloid/lymphoid or mixed-lineage leukemia (trithorax homolog, Drosophila); translocated to, 10 |                                                                                                                                                                                                                                                                           |
| NBN    | nibrin                                                                                          | This gene product is thought to be involved in DNA double-strand break repair and DNA damage-induced checkpoint activation.                                                                                                                                               |
| NCAPH2 | non-SMC condensin II complex, subunit H2                                                        | Condensin complexes I and II play essential roles in mitotic chromosome assembly and segregation.                                                                                                                                                                         |
| NCOA6  | nuclear receptor coactivator 6                                                                  | This protein is a transcriptional coactivator that can interact with nuclear hormone receptors to enhance their transcriptional activator functions. It is involved in the hormone-dependent coactivation of several receptors. It may also act as a general coactivator. |
| NFKB1  | nuclear factor of kappa light polypeptide gene enhancer in B-cells 1                            | NFKB is a transcription regulator that is activated by various intra- and extra-cellular stimuli such as cytokines, oxidant-free radicals, ultraviolet irradiation, and bacterial or viral products.                                                                      |
| NFKB2  | nuclear factor of kappa light polypeptide gene enhancer in B-cells 2 (p49/p100)                 | NFKB has been detected in numerous cell types that express cytokines, chemokines, growth factors, cell adhesion molecules, and some acute phase proteins in health and in various disease states. NFKB is activated by a wide variety of stimuli.                         |
| NFYA   | nuclear transcription factor Y, alpha                                                           | This protein is one subunit of a trimeric complex, forming a highly conserved transcription factor that binds to CCAAT motifs in the promoter regions in a variety of genes.                                                                                              |
| NOTCH3 | Notch homolog 3 (Drosophila)                                                                    | Notch interaction with its cell-bound ligands (delta, serrate) establishes an intercellular signalling pathway that plays a key role in neural development.                                                                                                               |
| NP     | nucleoside phosphorylase                                                                        | This protein is an enzyme which reversibly catalyzes the phosphorolysis of purine nucleosides.                                                                                                                                                                            |
| PDPK1  | 3-phosphoinositide dependent protein kinase-1                                                   |                                                                                                                                                                                                                                                                           |
| PICALM | phosphatidylinositol binding clathrin assembly protein                                          |                                                                                                                                                                                                                                                                           |
| PIK3R1 | phosphoinositide-3-kinase, regulatory subunit 1 (alpha)                                         | Phosphatidylinositol 3-kinase plays an important role in the metabolic actions of insulin.                                                                                                                                                                                |
| PLSCR1 | phospholipid scramblase 1                                                                       |                                                                                                                                                                                                                                                                           |
| PML    | promyelocytic leukemia                                                                          | This phosphoprotein localizes to nuclear bodies where it functions as a transcription factor and tumor suppressor. Its expression is cell-cycle related and it regulates the p53 response to oncogenic signals.                                                           |
| PRKCQ  | protein kinase C, theta                                                                         | This protein is one of the PKC family members important for T-cell activation, and may link the T cell receptor (TCR) signaling complex to the activation of the transcription factors.                                                                                   |

|         |                                                                                                   |                                                                                                                                                                                                                                                                    |
|---------|---------------------------------------------------------------------------------------------------|--------------------------------------------------------------------------------------------------------------------------------------------------------------------------------------------------------------------------------------------------------------------|
| PRNP    | prion protein                                                                                     | This protein is a membrane glycosylphosphatidylinositol-anchored glycoprotein that tends to aggregate into rod-like structures.                                                                                                                                    |
| PTPN2   | protein tyrosine phosphatase, non-receptor type 2                                                 | This protein regulates a variety of cellular processes including cell growth, differentiation, mitotic cycle, and oncogenic transformation.                                                                                                                        |
| PTPN6   | protein tyrosine phosphatase, non-receptor type 6                                                 | This protein is expressed primarily in hematopoietic cells, and functions as an important regulator of multiple signaling pathways in hematopoietic cells. It dephosphorylates a wide spectrum of phospho-proteins involved in hematopoietic cell signaling.       |
| PTPN11  | protein tyrosine phosphatase, non-receptor type 11                                                | This PTP is widely expressed in most tissues and plays a regulatory role in various cell signaling events that are important for a diversity of cell functions, such as mitogenic activation, metabolic control, transcription regulation, and cell migration.     |
| RALBP1  | ralA binding protein 1                                                                            |                                                                                                                                                                                                                                                                    |
| RBM15   | RNA binding motif protein 15                                                                      | Members of the SPEN (Split-end) family of proteins, including RBM15, have repressor function in several signaling pathways and may bind to RNA through interaction with spliceosome components.                                                                    |
| RHOH    | ras homolog gene family, member H                                                                 | This protein is transcribed only in hemopoietic cells.                                                                                                                                                                                                             |
| RIPK2   | receptor-interacting serine-threonine kinase 2                                                    | This protein is a component of signaling complexes in both the innate and adaptive immune pathways, and is a potent activator of NF-kappaB and inducer of apoptosis in response to various stimuli.                                                                |
| RUNX1   | runt-related transcription factor 1                                                               | This protein is thought to be involved in the development of normal hematopoiesis.                                                                                                                                                                                 |
| SART1   | squamous cell carcinoma antigen recognized by T cells                                             | This gene encodes two proteins, the SART1(800) protein expressed in the nucleus of the majority of proliferating cells, and the SART1(259) protein expressed in the cytosol of epithelial cancers, both thought to be involved in the regulation of proliferation. |
| SHC1    | SHC (Src homology 2 domain containing) transforming protein 1                                     |                                                                                                                                                                                                                                                                    |
| SMARCA5 | SWI/SNF related, matrix associated, actin dependent regulator of chromatin, subfamily a, member 5 | This protein is a component of the chromatin remodeling and spacing factor RSF, a facilitator of the transcription of class II genes by RNA polymerase II.                                                                                                         |
| SOD1    | superoxide dismutase 1, soluble                                                                   | This protein binds copper and zinc ions and is one of two isozymes responsible for destroying free superoxide radicals in the body.                                                                                                                                |
| SOX4    | SRY (sex determining region Y)-box 4                                                              | This protein may function in the apoptosis pathway leading to cell death as well as to tumorigenesis and may mediate downstream effects of PTH and PTHrP in bone development.                                                                                      |
| SP3     | Sp3 transcription factor                                                                          | This protein contains a zinc finger DNA-binding domain and several transactivation domains, and has been reported to function as a bifunctional transcription factor that either stimulates or represses the transcription of numerous genes.                      |
| SRF     | serum response factor (c-fos serum response element-binding transcription factor)                 | This protein stimulates both cell proliferation and differentiation. It participates in cell cycle regulation, apoptosis, cell growth, and cell differentiation.                                                                                                   |

|        |                                                                                                        |                                                                                                                                                                                                                                                                                                                                                    |
|--------|--------------------------------------------------------------------------------------------------------|----------------------------------------------------------------------------------------------------------------------------------------------------------------------------------------------------------------------------------------------------------------------------------------------------------------------------------------------------|
| STAT1  | signal transducer and activator of transcription 1, 91kDa                                              | This protein mediates the expression of a variety of genes, which is thought to be important for cell viability in response to different cell stimuli and pathogens.                                                                                                                                                                               |
| STAT3  | signal transducer and activator of transcription 3 (acute-phase response factor)                       | This protein mediates the expression of a variety of genes in response to cell stimuli, and thus plays a key role in many cellular processes such as cell growth and apoptosis.                                                                                                                                                                    |
| STAT6  | signal transducer and activator of transcription 6, interleukin-4 induced                              | This protein plays a central role in exerting IL4 mediated biological responses. It is found to induce the expression of BCL2L1/BCL-X(L), which is responsible for the anti-apoptotic activity of IL4. It also plays a role in differentiation of T helper 2 (Th2) cells, expression of cell surface markers, and class switch of immunoglobulins. |
| STAT5B | signal transducer and activator of transcription 5B                                                    | This protein mediates the signal transduction triggered by various cell ligands, such as IL2, IL4, CSF1, and different growth hormones. It is involved in TCR signaling, apoptosis, adult mammary gland development, and sexual dimorphism of liver gene expression.                                                                               |
| SYK    | spleen tyrosine kinase                                                                                 |                                                                                                                                                                                                                                                                                                                                                    |
| TAPBP  | TAP binding protein (tapasin)                                                                          | This glycoprotein which mediates interaction between newly assembled major histocompatibility complex (MHC) class I molecules and the transporter associated with antigen processing (TAP), which is required for the transport of antigenic peptides across the endoplasmic reticulum membrane.                                                   |
| TGFBR2 | transforming growth factor, beta receptor II (70/80kDa)                                                | This receptor regulates the transcription of a subset of genes related to cell proliferation.                                                                                                                                                                                                                                                      |
| THBS1  | thrombospondin 1                                                                                       | This protein is an adhesive glycoprotein that mediates cell-to-cell and cell-to-matrix interactions. It plays roles in platelet aggregation, angiogenesis, and tumorigenesis.                                                                                                                                                                      |
| THOC5  | THO complex 5                                                                                          |                                                                                                                                                                                                                                                                                                                                                    |
| TP53   | tumor protein p53                                                                                      | This gene encodes tumor protein p53, which responds to diverse cellular stresses to regulate target genes that induce cell cycle arrest, apoptosis, senescence, DNA repair, or changes in metabolism.                                                                                                                                              |
| TSC2   | tuberous sclerosis 2                                                                                   | This protein is a tumor suppressor and is able to stimulate specific GTPases.                                                                                                                                                                                                                                                                      |
| TTC7A  | tetratricopeptide repeat domain 7A                                                                     | TPR domain-containing proteins, such as TTC7A, have diverse functions in cell cycle control, protein transport, phosphate turnover, and protein trafficking or secretion, and they can act as chaperones or scaffolding proteins.                                                                                                                  |
| TWSG1  | twisted gastrulation homolog 1 (Drosophila)                                                            |                                                                                                                                                                                                                                                                                                                                                    |
| UBE2N  | ubiquitin-conjugating enzyme E2N (UBC13 homolog, yeast)                                                | The modification of proteins with ubiquitin is an important cellular mechanism for targeting abnormal or short-lived proteins for degradation.                                                                                                                                                                                                     |
| VAV3   | vav 3 guanine nucleotide exchange factor                                                               | This protein associates maximally with the nucleotide-free states of these GTPases.                                                                                                                                                                                                                                                                |
| XRCC5  | X-ray repair complementing defective repair in Chinese hamster cells 5 (double-strand-break rejoining) | This gene functionally complements Chinese hamster xrs-6, a mutant defective in DNA double-strand break repair and in ability to undergo V(D)J recombination.                                                                                                                                                                                      |

---

Hematological System Development and Function: Hematological Process: Hematological Process (2.41E-06)

|         |                                                         |                                                                                                                                                                                                                                         |
|---------|---------------------------------------------------------|-----------------------------------------------------------------------------------------------------------------------------------------------------------------------------------------------------------------------------------------|
| ADAM17  | ADAM metallopeptidase domain 17                         | This protein functions as a tumor necrosis factor-alpha converting enzyme; binds mitotic arrest deficient 2 protein, and also plays a prominent role in the activation of the Notch signaling pathway.                                  |
| ADAR    | adenosine deaminase, RNA-specific                       | This gene encodes the enzyme responsible for RNA editing by site-specific deamination of adenosines.                                                                                                                                    |
| AKT1    | v-akt murine thymoma viral oncogene homolog 1           | In the developing nervous system AKT is a critical mediator of growth factor-induced neuronal survival. Survival factors can suppress apoptosis.                                                                                        |
| AKT2    | v-akt murine thymoma viral oncogene homolog 2           | This gene is a putative oncogene encoding a subfamily of serine/threonine kinases containing SH2-like (Src homology 2-like) domains. The encoded protein is a general protein kinase capable of phosphorylating several known proteins. |
| ANXA7   | annexin A7                                              | Structural analysis of the protein suggests that Annexin VII is a membrane binding protein with diverse properties, including voltage-sensitive calcium channel activity, ion selectivity and membrane fusion.                          |
| AP3B1   | adaptor-related protein complex 3, beta 1 subunit       | This gene encodes a protein that may play a role in organelle biogenesis associated with melanosomes, platelet dense granules, and lysosomes.                                                                                           |
| AP3D1   | adaptor-related protein complex 3, delta 1 subunit      | The AP3D1 subunit is implicated in intracellular biogenesis and trafficking of pigment granules and platelet dense granules and neurotransmitter vesicles.                                                                              |
| APAF1   | apoptotic peptidase activating factor 1                 | This gene encodes a cytoplasmic protein that initiates apoptosis.                                                                                                                                                                       |
| B2M     | beta-2-microglobulin                                    | Beta-2-microglobulin is a serum protein found in association with the major histocompatibility complex (MHC) class I heavy chain on the surface of nearly all nucleated cells.                                                          |
| BAX     | BCL2-associated X protein                               | This protein forms a heterodimer with BCL2, and functions as an apoptotic activator.                                                                                                                                                    |
| BLOC1S3 | biogenesis of lysosomal organelles complex-1, subunit 3 | This complex is necessary for the biogenesis of specialized organelles of the endosomal-lysosomal system, including platelet dense granules and melanosomes.                                                                            |
| BSG     | basigin (Ok blood group)                                | This protein is a plasma membrane protein that is important in spermatogenesis, embryo implantation, neural network formation, and tumor progression.                                                                                   |
| CCL3    | chemokine (C-C motif) ligand 3                          | Macrophage inflammatory protein-1 is a so-called monokine that is involved in the acute inflammatory state in the recruitment and activation of polymorphonuclear leukocytes.                                                           |
| CCL4    | chemokine (C-C motif) ligand 4                          |                                                                                                                                                                                                                                         |
| CCND1   | cyclin D1                                               | This cyclin is required for cell cycle G1/S transition. It interacts with tumor suppressor protein Rb and the expression of this gene is regulated positively by Rb.                                                                    |
| CD44    | CD44 molecule (Indian blood group)                      | This protein participates in a wide variety of cellular functions including lymphocyte activation, recirculation and homing, hematopoiesis, and tumor metastasis.                                                                       |

|         |                                                                                                    |                                                                                                                                                                                                                                                                                                                                              |
|---------|----------------------------------------------------------------------------------------------------|----------------------------------------------------------------------------------------------------------------------------------------------------------------------------------------------------------------------------------------------------------------------------------------------------------------------------------------------|
| CD69    | CD69 molecule                                                                                      | Expression of this protein is induced upon activation of T lymphocytes, and may play a role in proliferation. It may act to transmit signals in natural killer cells and platelets.                                                                                                                                                          |
| CD81    | CD81 molecule                                                                                      | This protein appears to promote muscle cell fusion and support myotube maintenance, and may be involved in signal transduction.                                                                                                                                                                                                              |
| CD83    | CD83 molecule                                                                                      |                                                                                                                                                                                                                                                                                                                                              |
| CDC2L5  | cell division cycle 2-like 5 (cholinesterase-related cell division controller)                     | The proteins of this family are well known for their essential roles as master switches in cell cycle control. They may also be involved in neurocytoskeleton dynamics. The exact function of this protein has not yet been determined.                                                                                                      |
| CDKN2A  | cyclin-dependent kinase inhibitor 2A (melanoma, p16, inhibits CDK4)                                | This ARF product functions as a stabilizer of the tumor suppressor protein p53 as it can interact with, and sequester, MDM1, a protein responsible for the degradation of p53. It has a common functionality in cell cycle G1 control.                                                                                                       |
| CEBPD   | CCAAT/enhancer binding protein (C/EBP), delta                                                      | This protein is important in the regulation of genes involved in immune and inflammatory responses, and may be involved in the regulation of genes associated with activation and/or differentiation of macrophages.                                                                                                                         |
| CHD4    | chromodomain helicase DNA binding protein 4                                                        | This protein is the main component of the nucleosome remodeling and deacetylase complex and plays an important role in epigenetic transcriptional repression.                                                                                                                                                                                |
| CREB1   | cAMP responsive element binding protein 1                                                          | This protein induces transcription of genes in response to hormonal stimulation of the cAMP pathway.                                                                                                                                                                                                                                         |
| CTBP1   | C-terminal binding protein 1                                                                       | This proteins can interact with a polycomb group protein complex which participates in regulation of gene expression during development.                                                                                                                                                                                                     |
| CXCR4   | chemokine (C-X-C motif) receptor 4                                                                 | This protein acts with the CD4 protein to support HIV entry into cells and is also highly expressed in breast cancer cells.                                                                                                                                                                                                                  |
| DCLRE1C | DNA cross-link repair 1C (PSO2 homolog, S. cerevisiae)                                             | This nuclear protein is involved in V(D)J recombination and DNA repair.                                                                                                                                                                                                                                                                      |
| DICER1  | dicer 1, ribonuclease type III                                                                     | This ribonuclease is required by the RNA interference and small temporal RNA pathways to produce the active small RNA component that represses gene expression.                                                                                                                                                                              |
| DUSP1   | dual specificity phosphatase 1                                                                     | DUSP1 may play an important role in the human cellular response to environmental stress as well as in the negative regulation of cellular proliferation.                                                                                                                                                                                     |
| EDN1    | endothelin 1                                                                                       |                                                                                                                                                                                                                                                                                                                                              |
| EGFR    | epidermal growth factor receptor (erythroblastic leukemia viral (v-erb-b) oncogene homolog, avian) | Binding of this receptor to a ligand induces dimerization and tyrosine autophosphorylation and leads to cell proliferation.                                                                                                                                                                                                                  |
| EGR1    | early growth response 1                                                                            | This protein is a transcriptional regulator required for differentiation and mitogenesis.                                                                                                                                                                                                                                                    |
| ETV6    | ets variant 6                                                                                      | This gene encodes an ETS family transcription factor that it is required for hematopoiesis and maintenance of the developing vascular network.                                                                                                                                                                                               |
| FADD    | Fas (TNFRSF6)-associated via death domain                                                          | The protein encoded by this gene is an adaptor molecule that interacts with various cell surface receptors and mediates cell apoptotic signals.                                                                                                                                                                                              |
| FAS     | Fas (TNF receptor superfamily, member 6)                                                           | This protein has been shown to play a central role in the physiological regulation of programmed cell death, and has been implicated in the pathogenesis of various malignancies and diseases of the immune system. This receptor is found to be involved in transducing the proliferating signals in normal diploid fibroblast and T cells. |

|          |                                                               |                                                                                                                                                                                         |
|----------|---------------------------------------------------------------|-----------------------------------------------------------------------------------------------------------------------------------------------------------------------------------------|
| FCGR2A   | Fc fragment of IgG, low affinity IIa, receptor (CD32)         | This protein is a cell surface receptor found on phagocytic cells such as macrophages and neutrophils, and is involved in the process of phagocytosis and clearing of immune complexes. |
| FOS      | v-fos FBJ murine osteosarcoma viral oncogene homolog          | The FOS proteins have been implicated as regulators of cell proliferation, differentiation, transformation, and apoptotic cell death.                                                   |
| FUS      | fusion (involved in t(12;16) in malignant liposarcoma)        |                                                                                                                                                                                         |
| GGCX     | gamma-glutamyl carboxylase                                    | This protein is involved in coagulation and is essential for hemostasis.                                                                                                                |
| GNAQ     | guanine nucleotide binding protein (G protein), q polypeptide | G-alpha-q is the alpha subunit of one of the heterotrimeric GTP-binding proteins that mediates stimulation of phospholipase C-beta (MIM 600230).                                        |
| GRB2     | growth factor receptor-bound protein 2                        | The protein may be involved in the signal transduction pathway.                                                                                                                         |
| HDAC5    | histone deacetylase 5                                         | This protein possesses histone deacetylase activity and represses transcription when tethered to a promoter.                                                                            |
| HDAC7    | histone deacetylase 7                                         | This gene is orthologous to mouse HDAC7 gene whose protein promotes repression mediated via the transcriptional corepressor SMRT.                                                       |
| HSP90AA1 | heat shock protein 90kDa alpha (cytosolic), class A member 1  | HSP90 proteins are molecular chaperones that have key roles in signal transduction, protein folding, protein degradation, and morphologic evolution.                                    |
| HSP90B1  | heat shock protein 90kDa beta (Grp94), member 1               | HSP90 proteins play roles in folding newly synthesized proteins or stabilizing and refolding denatured proteins after stress.                                                           |
| HSPD1    | heat shock 60kDa protein 1 (chaperonin)                       | This protein may function as a signaling molecule in the innate immune system. It is essential for the folding and assembly of newly imported proteins in the mitochondria.             |
| ICAM1    | intercellular adhesion molecule 1                             | This gene encodes a cell surface glycoprotein which is typically expressed on endothelial cells and cells of the immune system.                                                         |
| ICOSLG   | inducible T-cell co-stimulator ligand                         |                                                                                                                                                                                         |
| IFNAR1   | interferon (alpha, beta and omega) receptor 1                 | Binding and activation of this receptor stimulates Janus protein kinases, it also functions as an antiviral factor.                                                                     |
| IFNGR1   | interferon gamma receptor 1                                   | This gene encodes the ligand-binding chain (alpha) of the gamma interferon receptor.                                                                                                    |
| IGF2     | insulin-like growth factor 2 (somatomedin A)                  | This gene encodes a member of the insulin family of polypeptide growth factors that is involved in development and growth.                                                              |
| IGF2R    | insulin-like growth factor 2 receptor                         | This receptor functions in the intracellular trafficking of lysosomal enzymes, the activation of transforming growth factor beta, and the degradation of IGF2.                          |
| IL8      | interleukin 8                                                 | This chemokine, one of the major mediators of the inflammatory response, functions as a chemoattractant, and is also a potent angiogenic factor.                                        |

|        |                                                                    |                                                                                                                                                                                                                                                                                                                              |
|--------|--------------------------------------------------------------------|------------------------------------------------------------------------------------------------------------------------------------------------------------------------------------------------------------------------------------------------------------------------------------------------------------------------------|
| IL2RG  | interleukin 2 receptor, gamma (severe combined immunodeficiency)   | The interleukin 2 (IL2) receptor gamma chain (IL2RG), an important signalling component of many interleukin receptors (IL2,IL4,IL7,IL9, and IL15).                                                                                                                                                                           |
| IL4R   | interleukin 4 receptor                                             | This protein can bind interleukin 4 to promote differentiation of Th2 cells, can be produced by an alternate splice variant or by proteolysis of the membrane-bound protein, and can inhibit IL4-mediated cell proliferation and IL5 upregulation by T-cells.                                                                |
| IL6R   | interleukin 6 receptor                                             | Interleukin 6 (IL6) is a potent pleiotropic cytokine that regulates cell growth and differentiation and plays an important role in immune response.                                                                                                                                                                          |
| IL7R   | interleukin 7 receptor                                             | This protein has been shown to play a critical role in the V(D)J recombination during lymphocyte development, and to control the accessibility of the TCR gamma locus by STAT5 and histone acetylation.                                                                                                                      |
| IRF1   | interferon regulatory factor 1                                     | IRF1 is a transcription activator of genes induced by interferons alpha, beta, and gamma. It also plays roles in regulating apoptosis and tumor-suppressioin.                                                                                                                                                                |
| IRF2   | interferon regulatory factor 2                                     | IRF2 competitively inhibits the IRF1-mediated transcriptional activation of interferons alpha and beta, and presumably other genes that employ IRF1 for transcription activation. However, IRF2 also functions as a transcriptional activator of histone H4.                                                                 |
| ITGA2  | integrin, alpha 2 (CD49B, alpha 2 subunit of VLA-2 receptor)       | Integrin alpha chain family members are found on a wide variety of cell types including, T cells, fibroblasts and platelets. Integrins are involved in cell adhesion and also participate in cell-surface mediated signalling.                                                                                               |
| ITGB2  | integrin, beta 2 (complement component 3 receptor 3 and 4 subunit) | Integrins are known to participate in cell adhesion as well as cell-surface mediated signalling.                                                                                                                                                                                                                             |
| JAK1   | Janus kinase 1                                                     | JAK1 is involved in the interferon-alpha/beta and -gamma signal transduction pathways. These kinases couple cytokine ligand binding to tyrosine phosphorylation of various known signaling proteins and of a unique family of transcription factors termed the signal transducers and activators of transcription, or STATs. |
| JMJD6  | jumonji domain containing 6                                        | JmjC domain-containing proteins are predicted to function as protein hydroxylases or histone demethylases.                                                                                                                                                                                                                   |
| JUN    | jun oncogene                                                       | This protein interacts directly with specific target DNA sequences to regulate gene expression.                                                                                                                                                                                                                              |
| LAMP1  | lysosomal-associated membrane protein 1                            | This glycoprotein provides selectins with carbohydrate ligands, and may play a role in tumor cell metastasis.                                                                                                                                                                                                                |
| LCN2   | lipocalin 2                                                        |                                                                                                                                                                                                                                                                                                                              |
| LYN    | v-yes-1 Yamaguchi sarcoma viral related oncogene homolog           |                                                                                                                                                                                                                                                                                                                              |
| MAFB   | v-maf musculoaponeurotic fibrosarcoma oncogene homolog B (avian)   | This protein plays an important role in the regulation of lineage-specific hematopoiesis. It represses ETS1-mediated transcription of erythroid-specific genes in myeloid cells.                                                                                                                                             |
| MAP2K7 | mitogen-activated protein kinase kinase 7                          | This kinase is involved in the signal transduction mediating the cell responses to proinflammatory cytokines, and environmental stresses.                                                                                                                                                                                    |
| MAP3K7 | mitogen-activated protein kinase kinase kinase 7                   | This kinase mediates the signaling transduction induced by TGF beta and morphogenetic protein (BMP), and controls a variety of cell functions including transcription regulation and apoptosis.This kinase can play a role in the cell response to environmental stresses.                                                   |

|        |                                                                                                 |                                                                                                                                                                                                                                                                                                                         |
|--------|-------------------------------------------------------------------------------------------------|-------------------------------------------------------------------------------------------------------------------------------------------------------------------------------------------------------------------------------------------------------------------------------------------------------------------------|
| MAPK14 | mitogen-activated protein kinase 14                                                             | This kinase may be involved in stress related transcription and cell cycle regulation, as well as in genotoxic stress response.                                                                                                                                                                                         |
| MCL1   | myeloid cell leukemia sequence 1 (BCL2-related)                                                 | The longer gene product (isoform 1) enhances cell survival by inhibiting apoptosis while the alternatively spliced shorter gene product (isoform 2) promotes apoptosis and is death-inducing.                                                                                                                           |
| MDM2   | Mdm2 p53 binding protein homolog (mouse)                                                        | This protein is a nuclear phosphoprotein that binds and inhibits transactivation by tumor protein p53, as part of an autoregulatory negative feedback loop. It also affects the cell cycle, apoptosis, and tumorigenesis through interactions with other proteins, including retinoblastoma 1 and ribosomal protein L5. |
| MDM4   | Mdm4 p53 binding protein homolog (mouse)                                                        | This protein plays a role in apoptosis.                                                                                                                                                                                                                                                                                 |
| MED1   | mediator complex subunit 1                                                                      | The protein encoded by this gene is a subunit of the CRSP (cofactor required for SP1 activation) complex, which, along with TFIID, is required for efficient activation by SP1. It also regulates p53-dependent apoptosis and it is essential for adipogenesis.                                                         |
| MEIS1  | Meis homeobox 1                                                                                 | Homeobox genes, of which the most well-characterized category is represented by the HOX genes, play a crucial role in normal development. In addition, several homeoproteins are involved in neoplasia.                                                                                                                 |
| MLL    | myeloid/lymphoid or mixed-lineage leukemia (trithorax homolog, Drosophila)                      | The MLL gene encodes a DNA-binding protein that methylates histone H3 (see MIM 601128) lys4 (H3K4) and positively regulates expression of target genes, including multiple HOX genes (see MIM 142980).                                                                                                                  |
| MLLT1  | myeloid/lymphoid or mixed-lineage leukemia (trithorax homolog, Drosophila); translocated to, 1  |                                                                                                                                                                                                                                                                                                                         |
| MLLT10 | myeloid/lymphoid or mixed-lineage leukemia (trithorax homolog, Drosophila); translocated to, 10 |                                                                                                                                                                                                                                                                                                                         |
| NBN    | nibrin                                                                                          | This gene product is thought to be involved in DNA double-strand break repair and DNA damage-induced checkpoint activation.                                                                                                                                                                                             |
| NCAPH2 | non-SMC condensin II complex, subunit H2                                                        | Condensin complexes I and II play essential roles in mitotic chromosome assembly and segregation.                                                                                                                                                                                                                       |
| NCOA6  | nuclear receptor coactivator 6                                                                  | This protein is a transcriptional coactivator that can interact with nuclear hormone receptors to enhance their transcriptional activator functions. It is involved in the hormone-dependent coactivation of several receptors. It may also act as a general coactivator.                                               |
| NFKB1  | nuclear factor of kappa light polypeptide gene enhancer in B-cells 1                            | NFKB is a transcription regulator that is activated by various intra- and extra-cellular stimuli such as cytokines, oxidant-free radicals, ultraviolet irradiation, and bacterial or viral products.                                                                                                                    |
| NFKB2  | nuclear factor of kappa light polypeptide gene enhancer in B-cells 2 (p49/p100)                 | NFKB has been detected in numerous cell types that express cytokines, chemokines, growth factors, cell adhesion molecules, and some acute phase proteins in health and in various disease states. NFKB is activated by a wide variety of stimuli.                                                                       |
| NFYA   | nuclear transcription factor Y, alpha                                                           | This protein is one subunit of a trimeric complex, forming a highly conserved transcription factor that binds to CCAAT motifs in the promoter regions in a variety of genes.                                                                                                                                            |

|        |                                                         |                                                                                                                                                                                                                                                                                                       |
|--------|---------------------------------------------------------|-------------------------------------------------------------------------------------------------------------------------------------------------------------------------------------------------------------------------------------------------------------------------------------------------------|
| NOTCH3 | Notch homolog 3 (Drosophila)                            | Notch interaction with its cell-bound ligands (delta, serrate) establishes an intercellular signalling pathway that plays a key role in neural development.                                                                                                                                           |
| NP     | nucleoside phosphorylase                                | This protein is an enzyme which reversibly catalyzes the phosphorolysis of purine nucleosides.                                                                                                                                                                                                        |
| PABPC4 | poly(A) binding protein, cytoplasmic 4 (inducible form) | PABPC4 might be necessary for regulation of stability of labile mRNA species in activated T cells, and may also be involved in the regulation of protein translation in platelets and megakaryocytes or may participate in the binding or stabilization of polyadenylates in platelet dense granules. |
| PDPK1  | 3-phosphoinositide dependent protein kinase-1           |                                                                                                                                                                                                                                                                                                       |
| PICALM | phosphatidylinositol binding clathrin assembly protein  |                                                                                                                                                                                                                                                                                                       |
| PIK3R1 | phosphoinositide-3-kinase, regulatory subunit 1 (alpha) | Phosphatidylinositol 3-kinase plays an important role in the metabolic actions of insulin.                                                                                                                                                                                                            |
| PLSCR1 | phospholipid scramblase 1                               |                                                                                                                                                                                                                                                                                                       |
| PML    | promyelocytic leukemia                                  | This phosphoprotein localizes to nuclear bodies where it functions as a transcription factor and tumor suppressor. Its expression is cell-cycle related and it regulates the p53 response to oncogenic signals.                                                                                       |
| PRKCQ  | protein kinase C, theta                                 | This protein is one of the PKC family members important for T-cell activation, and may link the T cell receptor (TCR) signaling complex to the activation of the transcription factors.                                                                                                               |
| PRNP   | prion protein                                           | This protein is a membrane glycosylphosphatidylinositol-anchored glycoprotein that tends to aggregate into rod-like structures.                                                                                                                                                                       |
| PSEN1  | presenilin 1                                            | Presenilins may regulate APP processing through their effects on gamma-secretase. Also, it is thought that they help cleave the Notch receptor, such that they either directly regulate gamma-secretase activity or themselves are protease enzymes.                                                  |
| PTPN2  | protein tyrosine phosphatase, non-receptor type 2       | This protein regulates a variety of cellular processes including cell growth, differentiation, mitotic cycle, and oncogenic transformation.                                                                                                                                                           |
| PTPN6  | protein tyrosine phosphatase, non-receptor type 6       | This protein is expressed primarily in hematopoietic cells, and functions as an important regulator of multiple signaling pathways in hematopoietic cells. It dephosphorylates a wide spectrum of phospho-proteins involved in hematopoietic cell signaling.                                          |
| PTPN11 | protein tyrosine phosphatase, non-receptor type 11      | This PTP is widely expressed in most tissues and plays a regulatory role in various cell signaling events that are important for a diversity of cell functions, such as mitogenic activation, metabolic control, transcription regulation, and cell migration.                                        |
| RAB27A | RAB27A, member RAS oncogene family                      | This protein may be involved in protein transport and small GTPase mediated signal transduction.                                                                                                                                                                                                      |
| RALBP1 | ralA binding protein 1                                  |                                                                                                                                                                                                                                                                                                       |
| RBM15  | RNA binding motif protein 15                            | Members of the SPEN (Split-end) family of proteins, including RBM15, have repressor function in several signaling pathways and may bind to RNA through interaction with spliceosome components.                                                                                                       |
| RHOH   | ras homolog gene family, member H                       | This protein is transcribed only in hemopoietic cells.                                                                                                                                                                                                                                                |

|         |                                                                                                   |                                                                                                                                                                                                                                                                                                                                                    |
|---------|---------------------------------------------------------------------------------------------------|----------------------------------------------------------------------------------------------------------------------------------------------------------------------------------------------------------------------------------------------------------------------------------------------------------------------------------------------------|
| RIPK2   | receptor-interacting serine-threonine kinase 2                                                    | This protein is a component of signaling complexes in both the innate and adaptive immune pathways, and is a potent activator of NF-kappaB and inducer of apoptosis in response to various stimuli.                                                                                                                                                |
| RUNX1   | runt-related transcription factor 1                                                               | This protein is thought to be involved in the development of normal hematopoiesis.                                                                                                                                                                                                                                                                 |
| SART1   | squamous cell carcinoma antigen recognized by T cells                                             | This gene encodes two proteins, the SART1(800) protein expressed in the nucleus of the majority of proliferating cells, and the SART1(259) protein expressed in the cytosol of epithelial cancers, both thought to be involved in the regulation of proliferation.                                                                                 |
| SHC1    | SHC (Src homology 2 domain containing) transforming protein 1                                     |                                                                                                                                                                                                                                                                                                                                                    |
| SMARCA5 | SWI/SNF related, matrix associated, actin dependent regulator of chromatin, subfamily a, member 5 | This protein is a component of the chromatin remodeling and spacing factor RSF, a facilitator of the transcription of class II genes by RNA polymerase II.                                                                                                                                                                                         |
| SOD1    | superoxide dismutase 1, soluble                                                                   | This protein binds copper and zinc ions and is one of two isozymes responsible for destroying free superoxide radicals in the body.                                                                                                                                                                                                                |
| SOX4    | SRY (sex determining region Y)-box 4                                                              | This protein may function in the apoptosis pathway leading to cell death as well as to tumorigenesis and may mediate downstream effects of PTH and PTHrP in bone development.                                                                                                                                                                      |
| SP3     | Sp3 transcription factor                                                                          | This protein contains a zinc finger DNA-binding domain and several transactivation domains, and has been reported to function as a bifunctional transcription factor that either stimulates or represses the transcription of numerous genes.                                                                                                      |
| SRF     | serum response factor (c-fos serum response element-binding transcription factor)                 | This protein stimulates both cell proliferation and differentiation. It participates in cell cycle regulation, apoptosis, cell growth, and cell differentiation.                                                                                                                                                                                   |
| STAT1   | signal transducer and activator of transcription 1, 91kDa                                         | This protein mediates the expression of a variety of genes, which is thought to be important for cell viability in response to different cell stimuli and pathogens.                                                                                                                                                                               |
| STAT3   | signal transducer and activator of transcription 3 (acute-phase response factor)                  | This protein mediates the expression of a variety of genes in response to cell stimuli, and thus plays a key role in many cellular processes such as cell growth and apoptosis.                                                                                                                                                                    |
| STAT6   | signal transducer and activator of transcription 6, interleukin-4 induced                         | This protein plays a central role in exerting IL4 mediated biological responses. It is found to induce the expression of BCL2L1/BCL-X(L), which is responsible for the anti-apoptotic activity of IL4. It also plays a role in differentiation of T helper 2 (Th2) cells, expression of cell surface markers, and class switch of immunoglobulins. |
| STAT5B  | signal transducer and activator of transcription 5B                                               | This protein mediates the signal transduction triggered by various cell ligands, such as IL2, IL4, CSF1, and different growth hormones. It is involved in TCR signaling, apoptosis, adult mammary gland development, and sexual dimorphism of liver gene expression.                                                                               |
| SYK     | spleen tyrosine kinase                                                                            |                                                                                                                                                                                                                                                                                                                                                    |

|        |                                                                                                        |                                                                                                                                                                                                                                                                                                  |
|--------|--------------------------------------------------------------------------------------------------------|--------------------------------------------------------------------------------------------------------------------------------------------------------------------------------------------------------------------------------------------------------------------------------------------------|
| TAPBP  | TAP binding protein (tapasin)                                                                          | This glycoprotein which mediates interaction between newly assembled major histocompatibility complex (MHC) class I molecules and the transporter associated with antigen processing (TAP), which is required for the transport of antigenic peptides across the endoplasmic reticulum membrane. |
| TGFBR2 | transforming growth factor, beta receptor II (70/80kDa)                                                | This receptor regulates the transcription of a subset of genes related to cell proliferation.                                                                                                                                                                                                    |
| THBD   | thrombomodulin                                                                                         | The binding of this protein to thrombin results in the activation of protein C, which degrades clotting factors Va and VIIIa and reduces the amount of thrombin generated.                                                                                                                       |
| THBS1  | thrombospondin 1                                                                                       | This protein is an adhesive glycoprotein that mediates cell-to-cell and cell-to-matrix interactions. It plays roles in platelet aggregation, angiogenesis, and tumorigenesis.                                                                                                                    |
| THOC5  | THO complex 5                                                                                          |                                                                                                                                                                                                                                                                                                  |
| TP53   | tumor protein p53                                                                                      | This gene encodes tumor protein p53, which responds to diverse cellular stresses to regulate target genes that induce cell cycle arrest, apoptosis, senescence, DNA repair, or changes in metabolism.                                                                                            |
| TSC2   | tuberous sclerosis 2                                                                                   | This protein is a tumor suppressor and is able to stimulate specific GTPases.                                                                                                                                                                                                                    |
| TTC7A  | tetratricopeptide repeat domain 7A                                                                     | TPR domain-containing proteins, such as TTC7A, have diverse functions in cell cycle control, protein transport, phosphate turnover, and protein trafficking or secretion, and they can act as chaperones or scaffolding proteins.                                                                |
| TWSG1  | twisted gastrulation homolog 1 (Drosophila)                                                            |                                                                                                                                                                                                                                                                                                  |
| UBE2N  | ubiquitin-conjugating enzyme E2N (UBC13 homolog, yeast)                                                | The modification of proteins with ubiquitin is an important cellular mechanism for targeting abnormal or short-lived proteins for degradation.                                                                                                                                                   |
| VAV3   | vav 3 guanine nucleotide exchange factor                                                               | This protein associates maximally with the nucleotide-free states of these GTPases.                                                                                                                                                                                                              |
| XRCC5  | X-ray repair complementing defective repair in Chinese hamster cells 5 (double-strand-break rejoining) | This gene functionally complements Chinese hamster xrs-6, a mutant defective in DNA double-strand break repair and in ability to undergo V(D)J recombination.                                                                                                                                    |

Hematological System  
Development and Function:  
Quantity of Lymphocytes (5.41E-06),  
Quantity of B Lymphocytes (8.92E-04),  
Quantity of T Lymphocytes (2.17E-03)

AFF1

AF4/FMR2 family, member 1

|        |                                                                     |                                                                                                                                                                                                                                              |
|--------|---------------------------------------------------------------------|----------------------------------------------------------------------------------------------------------------------------------------------------------------------------------------------------------------------------------------------|
| AHR    | aryl hydrocarbon receptor                                           | This protein regulates biological responses to planar aromatic hydrocarbons and xenobiotic-metabolizing enzymes such as cytochrome P450.                                                                                                     |
| AKT1   | v-akt murine thymoma viral oncogene homolog 1                       | In the developing nervous system AKT is a critical mediator of growth factor-induced neuronal survival. Survival factors can suppress apoptosis.                                                                                             |
| B2M    | beta-2-microglobulin                                                | Beta-2-microglobulin is a serum protein found in association with the major histocompatibility complex (MHC) class I heavy chain on the surface of nearly all nucleated cells.                                                               |
| C5AR1  | complement component 5a receptor 1                                  |                                                                                                                                                                                                                                              |
| CARM1  | coactivator-associated arginine methyltransferase 1                 | CARM1 is involved in the process of protein arginine methylation which has been implicated in signal transduction, metabolism of nascent pre-RNA, and transcriptional activation.                                                            |
| CD69   | CD69 molecule                                                       | Expression of this protein is induced upon activation of T lymphocytes, and may play a role in proliferation. It may act to transmit signals in natural killer cells and platelets.                                                          |
| CD81   | CD81 molecule                                                       | This protein appears to promote muscle cell fusion and support myotube maintenance, and may be involved in signal transduction.                                                                                                              |
| CD83   | CD83 molecule                                                       |                                                                                                                                                                                                                                              |
| CDKN1A | cyclin-dependent kinase inhibitor 1A (p21, Cip1)                    | This protein functions as a regulator of cell cycle progression at G1. It also plays a regulatory role in S phase DNA replication and DNA damage repair, and may be instrumental in the execution of apoptosis following caspase activation. |
| CDKN2A | cyclin-dependent kinase inhibitor 2A (melanoma, p16, inhibits CDK4) | This ARF product functions as a stabilizer of the tumor suppressor protein p53 as it can interact with, and sequester, MDM1, a protein responsible for the degradation of p53. It has a common functionality in cell cycle G1 control.       |
| CEBPB  | CCAAT/enhancer binding protein (C/EBP), beta                        | This protein is important in the regulation of genes involved in immune and inflammatory responses. It can also bind the promoter and upstream element and stimulate the expression of the collagen type I gene.                             |
| CFLAR  | CASP8 and FADD-like apoptosis regulator                             |                                                                                                                                                                                                                                              |
| CHUK   | conserved helix-loop-helix ubiquitous kinase                        | This protein phosphorylates sites that trigger the degradation of the inhibitor via the ubiquitination pathway, thereby activating the transcription factor.                                                                                 |
| CREB1  | cAMP responsive element binding protein 1                           | This protein induces transcription of genes in response to hormonal stimulation of the cAMP pathway.                                                                                                                                         |
| CREBBP | CREB binding protein                                                | This protein binds to cAMP-response element binding protein (CREB), and plays critical roles in embryonic development, growth control, and homeostasis by coupling chromatin remodeling to transcription factor recognition.                 |
| CTSS   | cathepsin S                                                         | This protein may participate in the degradation of antigenic proteins to peptides for presentation on MHC class II molecules. It can also function as an elastase over a broad pH range in alveolar macrophages.                             |
| CXCR4  | chemokine (C-X-C motif) receptor 4                                  | This protein acts with the CD4 protein to support HIV entry into cells and is also highly expressed in breast cancer cells.                                                                                                                  |
| CYLD   | cylindromatosis (turban tumor syndrome)                             | This protein functions as a deubiquitinating enzyme.                                                                                                                                                                                         |
| CYTIP  | cytohesin 1 interacting protein                                     | This protein modulates the activation of ARF genes by CYTH1. It interacts with CYTH1 and SNX27 proteins and may act to sequester CYTH1 protein in the cytoplasm.                                                                             |

|         |                                                                                                                |                                                                                                                                                                                                                                                                                                                                              |
|---------|----------------------------------------------------------------------------------------------------------------|----------------------------------------------------------------------------------------------------------------------------------------------------------------------------------------------------------------------------------------------------------------------------------------------------------------------------------------------|
| DDR1    | discoidin domain receptor tyrosine kinase 1                                                                    | The protein encoded by this gene is a RTK that is widely expressed in normal and transformed epithelial cells and is activated by various types of collagen.                                                                                                                                                                                 |
| DICER1  | dicer 1, ribonuclease type III                                                                                 | This ribonuclease is required by the RNA interference and small temporal RNA pathways to produce the active small RNA component that represses gene expression.                                                                                                                                                                              |
| EGR1    | early growth response 1                                                                                        | This protein is a transcriptional regulator required for differentiation and mitogenesis.                                                                                                                                                                                                                                                    |
| ERBB2   | v-erb-b2 erythroblastic leukemia viral oncogene homolog 2, neuro/glioblastoma derived oncogene homolog (avian) | This protein binds to other ligand-bound EGF receptor family members to form a heterodimer, stabilizing ligand binding and enhancing kinase-mediated activation of downstream signalling pathways, such as those involving mitogen-activated protein kinase and phosphatidylinositol-3 kinase.                                               |
| ETV6    | ets variant 6                                                                                                  | This gene encodes an ETS family transcription factor that it is required for hematopoiesis and maintenance of the developing vascular network.                                                                                                                                                                                               |
| FADD    | Fas (TNFRSF6)-associated via death domain                                                                      | The protein encoded by this gene is an adaptor molecule that interacts with various cell surface receptors and mediates cell apoptotic signals.                                                                                                                                                                                              |
| FAS     | Fas (TNF receptor superfamily, member 6)                                                                       | This protein has been shown to play a central role in the physiological regulation of programmed cell death, and has been implicated in the pathogenesis of various malignancies and diseases of the immune system. This receptor is found to be involved in transducing the proliferating signals in normal diploid fibroblast and T cells. |
| FCGR2A  | Fc fragment of IgG, low affinity IIa, receptor (CD32)                                                          | This protein is a cell surface receptor found on phagocytic cells such as macrophages and neutrophils, and is involved in the process of phagocytosis and clearing of immune complexes.                                                                                                                                                      |
| GCNT1   | glucosaminyl (N-acetyl) transferase 1, core 2 (beta-1,6-N-acetylglucosaminyltransferase)                       | This protein is essential to the formation of Gal beta 1-3(GlcNAc beta 1-6)GalNAc structures and the core 2 O-glycan branch.                                                                                                                                                                                                                 |
| GSTP1   | glutathione S-transferase pi 1                                                                                 | This GST family member functions in xenobiotic metabolism and play a role in susceptibility to cancer, and other diseases.                                                                                                                                                                                                                   |
| HEXB    | hexosaminidase B (beta polypeptide)                                                                            | Hexosaminidase B catalyzes the degradation of the ganglioside GM2, and other molecules containing terminal N-acetyl hexosamines.                                                                                                                                                                                                             |
| HSP90B1 | heat shock protein 90kDa beta (Grp94), member 1                                                                | HSP90 proteins play roles in folding newly synthesized proteins or stabilizing and refolding denatured proteins after stress.                                                                                                                                                                                                                |
| ICAM1   | intercellular adhesion molecule 1                                                                              | This gene encodes a cell surface glycoprotein which is typically expressed on endothelial cells and cells of the immune system.                                                                                                                                                                                                              |
| ICOSLG  | inducible T-cell co-stimulator ligand                                                                          |                                                                                                                                                                                                                                                                                                                                              |
| IFNAR1  | interferon (alpha, beta and omega) receptor 1                                                                  | Binding and activation of this receptor stimulates Janus protein kinases, it also functions as an antiviral factor.                                                                                                                                                                                                                          |
| IFNGR1  | interferon gamma receptor 1                                                                                    | This gene encodes the ligand-binding chain (alpha) of the gamma interferon receptor.                                                                                                                                                                                                                                                         |

|        |                                                                      |                                                                                                                                                                                                                                                                                                                         |
|--------|----------------------------------------------------------------------|-------------------------------------------------------------------------------------------------------------------------------------------------------------------------------------------------------------------------------------------------------------------------------------------------------------------------|
| IGF2   | insulin-like growth factor 2 (somatomedin A)                         | This gene encodes a member of the insulin family of polypeptide growth factors that is involved in development and growth.                                                                                                                                                                                              |
| IGF2R  | insulin-like growth factor 2 receptor                                | This receptor functions in the intracellular trafficking of lysosomal enzymes, the activation of transforming growth factor beta, and the degradation of IGF2.                                                                                                                                                          |
| IL2RG  | interleukin 2 receptor, gamma (severe combined immunodeficiency)     | The interleukin 2 (IL2) receptor gamma chain (IL2RG), an important signalling component of many interleukin receptors (IL2,IL4,IL7,IL9, and IL15).                                                                                                                                                                      |
| IL7R   | interleukin 7 receptor                                               | This protein has been shown to play a critical role in the V(D)J recombination during lymphocyte development, and to control the accessibility of the TCR gamma locus by STAT5 and histone acetylation.                                                                                                                 |
| IRF1   | interferon regulatory factor 1                                       | IRF1 is a transcription activator of genes induced by interferons alpha, beta, and gamma. It also plays roles in regulating apoptosis and tumor-suppressoion.                                                                                                                                                           |
| ISG15  | ISG15 ubiquitin-like modifier                                        | G1P2 is a ubiquitin-like protein that becomes conjugated to many cellular proteins upon activation by interferon-alpha (IFNA; MIM 147660) and -beta (IFNB; MIM 147640).                                                                                                                                                 |
| ITGAM  | integrin, alpha M (complement component 3 receptor 3 subunit)        | The alpha M beta 2 integrin is important in the adherence of neutrophils and monocytes to stimulated endothelium, and also in the phagocytosis of complement coated particles.                                                                                                                                          |
| ITGB2  | integrin, beta 2 (complement component 3 receptor 3 and 4 subunit)   | Integrins are known to participate in cell adhesion as well as cell-surface mediated signalling.                                                                                                                                                                                                                        |
| KLF4   | Kruppel-like factor 4 (gut)                                          |                                                                                                                                                                                                                                                                                                                         |
| LDLR   | low density lipoprotein receptor                                     | Low density lipoprotein (LDL) is taken into the cell ending up in lysosomes where it is degraded and the cholesterol is made available for repression of microsomal enzyme HMG CoA reductase, the rate-limiting step in cholesterol synthesis.                                                                          |
| LGALS8 | lectin, galactoside-binding, soluble, 8                              | This gene is widely expressed in tumoral tissues and seems to be involved in integrin-like cell interactions.                                                                                                                                                                                                           |
| LSP1   | lymphocyte-specific protein 1                                        | The protein may regulate neutrophil motility, adhesion to fibrinogen matrix proteins, and transendothelial migration.                                                                                                                                                                                                   |
| LYN    | v-yes-1 Yamaguchi sarcoma viral related oncogene homolog             |                                                                                                                                                                                                                                                                                                                         |
| MAP3K7 | mitogen-activated protein kinase kinase kinase 7                     | This kinase mediates the signaling transduction induced by TGF beta and morphogenetic protein (BMP), and controls a variety of cell functions including transcription regulation and apoptosis.This kinase can play a role in the cell response to environmental stresses.                                              |
| MDM2   | Mdm2 p53 binding protein homolog (mouse)                             | This protein is a nuclear phosphoprotein that binds and inhibits transactivation by tumor protein p53, as part of an autoregulatory negative feedback loop. It also affects the cell cycle, apoptosis, and tumorigenesis through interactions with other proteins, including retinoblastoma 1 and ribosomal protein L5. |
| MPZ    | myelin protein zero                                                  | This gene encodes a major structural protein of peripheral myelin.                                                                                                                                                                                                                                                      |
| NFKB1  | nuclear factor of kappa light polypeptide gene enhancer in B-cells 1 | NFKB is a transcription regulator that is activated by various intra- and extra-cellular stimuli such as cytokines, oxidant-free radicals, ultraviolet irradiation, and bacterial or viral products.                                                                                                                    |

|         |                                                                                                                  |                                                                                                                                                                                                                                                              |
|---------|------------------------------------------------------------------------------------------------------------------|--------------------------------------------------------------------------------------------------------------------------------------------------------------------------------------------------------------------------------------------------------------|
| NFKB2   | nuclear factor of kappa light polypeptide gene enhancer in B-cells 2 (p49/p100)                                  | NFKB has been detected in numerous cell types that express cytokines, chemokines, growth factors, cell adhesion molecules, and some acute phase proteins in health and in various disease states. NFKB is activated by a wide variety of stimuli.            |
| NP      | nucleoside phosphorylase                                                                                         | This protein is an enzyme which reversibly catalyzes the phosphorolysis of purine nucleosides.                                                                                                                                                               |
| NR4A1   | nuclear receptor subfamily 4, group A, member 1                                                                  | This protein acts as a nuclear transcription factor. Translocation of the protein from the nucleus to mitochondria induces apoptosis.                                                                                                                        |
| PIK3AP1 | phosphoinositide-3-kinase adaptor protein 1                                                                      |                                                                                                                                                                                                                                                              |
| PIK3R1  | phosphoinositide-3-kinase, regulatory subunit 1 (alpha)                                                          | Phosphatidylinositol 3-kinase plays an important role in the metabolic actions of insulin.                                                                                                                                                                   |
| PRNP    | prion protein                                                                                                    | This protein is a membrane glycosylphosphatidylinositol-anchored glycoprotein that tends to aggregate into rod-like structures.                                                                                                                              |
| PTPN2   | protein tyrosine phosphatase, non-receptor type 2                                                                | This protein regulates a variety of cellular processes including cell growth, differentiation, mitotic cycle, and oncogenic transformation.                                                                                                                  |
| PTPN6   | protein tyrosine phosphatase, non-receptor type 6                                                                | This protein is expressed primarily in hematopoietic cells, and functions as an important regulator of multiple signaling pathways in hematopoietic cells. It dephosphorylates a wide spectrum of phospho-proteins involved in hematopoietic cell signaling. |
| RBL2    | retinoblastoma-like 2 (p130)                                                                                     |                                                                                                                                                                                                                                                              |
| RBM15   | RNA binding motif protein 15                                                                                     | Members of the SPEN (Split-end) family of proteins, including RBM15, have repressor function in several signaling pathways and may bind to RNA through interaction with spliceosome components.                                                              |
| RHOH    | ras homolog gene family, member H                                                                                | This protein is transcribed only in hemopoietic cells.                                                                                                                                                                                                       |
| RUNX1   | runt-related transcription factor 1                                                                              | This protein is thought to be involved in the development of normal hematopoiesis.                                                                                                                                                                           |
| SEMA4D  | sema domain, immunoglobulin domain (Ig), transmembrane domain (TM) and short cytoplasmic domain, (semaphorin) 4D |                                                                                                                                                                                                                                                              |
| SRF     | serum response factor (c-fos serum response element-binding transcription factor)                                | This protein stimulates both cell proliferation and differentiation. It participates in cell cycle regulation, apoptosis, cell growth, and cell differentiation.                                                                                             |
| STAM2   | signal transducing adaptor molecule (SH3 domain and ITAM motif) 2                                                | This protein is thought to exhibit compensatory effects on the signaling pathway downstream of JAK kinases upon cytokine stimulation.                                                                                                                        |

|        |                                                                                  |                                                                                                                                                                                                                                                                      |
|--------|----------------------------------------------------------------------------------|----------------------------------------------------------------------------------------------------------------------------------------------------------------------------------------------------------------------------------------------------------------------|
| STAT1  | signal transducer and activator of transcription 1, 91kDa                        | This protein mediates the expression of a variety of genes, which is thought to be important for cell viability in response to different cell stimuli and pathogens.                                                                                                 |
| STAT3  | signal transducer and activator of transcription 3 (acute-phase response factor) | This protein mediates the expression of a variety of genes in response to cell stimuli, and thus plays a key role in many cellular processes such as cell growth and apoptosis.                                                                                      |
| STAT5B | signal transducer and activator of transcription 5B                              | This protein mediates the signal transduction triggered by various cell ligands, such as IL2, IL4, CSF1, and different growth hormones. It is involved in TCR signaling, apoptosis, adult mammary gland development, and sexual dimorphism of liver gene expression. |
| STK17B | serine/threonine kinase 17b                                                      |                                                                                                                                                                                                                                                                      |
| TAP1   | transporter 1, ATP-binding cassette, sub-family B (MDR/TAP)                      | This protein is involved in the pumping of degraded cytosolic peptides across the endoplasmic reticulum into the membrane-bound compartment where class I molecules assemble.                                                                                        |
| TGFBR2 | transforming growth factor, beta receptor II (70/80kDa)                          | This receptor regulates the transcription of a subset of genes related to cell proliferation.                                                                                                                                                                        |
| TLR2   | toll-like receptor 2                                                             | This protein encoded by this gene is a member of the Toll-like receptor (TLR) family which plays a fundamental role in pathogen recognition and activation of innate immunity. It mediates host response to Gram-positive bacteria.                                  |
| TP53   | tumor protein p53                                                                | This gene encodes tumor protein p53, which responds to diverse cellular stresses to regulate target genes that induce cell cycle arrest, apoptosis, senescence, DNA repair, or changes in metabolism.                                                                |
| TXNIP  | thioredoxin interacting protein                                                  |                                                                                                                                                                                                                                                                      |

Hematological System Development and Function: Quantity of Blood Cells (1.90E-05)

|      |                                                                         |                                                                                                                                                                                |
|------|-------------------------------------------------------------------------|--------------------------------------------------------------------------------------------------------------------------------------------------------------------------------|
| AFF1 | AF4/FMR2 family, member 1                                               |                                                                                                                                                                                |
| AHR  | aryl hydrocarbon receptor                                               | This protein regulates biological responses to planar aromatic hydrocarbons and xenobiotic-metabolizing enzymes such as cytochrome P450.                                       |
| AKT1 | v-akt murine thymoma viral oncogene homolog 1                           | In the developing nervous system AKT is a critical mediator of growth factor-induced neuronal survival. Survival factors can suppress apoptosis.                               |
| ATF4 | activating transcription factor 4 (tax-responsive enhancer element B67) | This transcription factor was isolated and characterized as the cAMP-response element binding protein 2 (CREB-2).                                                              |
| B2M  | beta-2-microglobulin                                                    | Beta-2-microglobulin is a serum protein found in association with the major histocompatibility complex (MHC) class I heavy chain on the surface of nearly all nucleated cells. |

|        |                                                                     |                                                                                                                                                                                                                                              |
|--------|---------------------------------------------------------------------|----------------------------------------------------------------------------------------------------------------------------------------------------------------------------------------------------------------------------------------------|
| BAK1   | BCL2-antagonist/killer 1                                            | This protein functions to induce apoptosis, by accelerating the opening of the mitochondrial voltage-dependent anion channel, leading to a loss in membrane potential and the release of cytochrome c.                                       |
| BAX    | BCL2-associated X protein                                           | This protein forms a heterodimer with BCL2, and functions as an apoptotic activator.                                                                                                                                                         |
| C5AR1  | complement component 5a receptor 1                                  |                                                                                                                                                                                                                                              |
| CAPNS1 | calpain, small subunit 1                                            | This gene encodes a small subunit common to both calpain I and II and is associated with myotonic dystrophy.                                                                                                                                 |
| CARM1  | coactivator-associated arginine methyltransferase 1                 | CARM1 is involved in the process of protein arginine methylation which has been implicated in signal transduction, metabolism of nascent pre-RNA, and transcriptional activation.                                                            |
| CCL3   | chemokine (C-C motif) ligand 3                                      | Macrophage inflammatory protein-1 is a so-called monokine that is involved in the acute inflammatory state in the recruitment and activation of polymorphonuclear leukocytes.                                                                |
| CD69   | CD69 molecule                                                       | Expression of this protein is induced upon activation of T lymphocytes, and may play a role in proliferation. It may act to transmit signals in natural killer cells and platelets.                                                          |
| CD81   | CD81 molecule                                                       | This protein appears to promote muscle cell fusion and support myotube maintenance, and may be involved in signal transduction.                                                                                                              |
| CD83   | CD83 molecule                                                       |                                                                                                                                                                                                                                              |
| CDKN1A | cyclin-dependent kinase inhibitor 1A (p21, Cip1)                    | This protein functions as a regulator of cell cycle progression at G1. It also plays a regulatory role in S phase DNA replication and DNA damage repair, and may be instrumental in the execution of apoptosis following caspase activation. |
| CDKN2A | cyclin-dependent kinase inhibitor 2A (melanoma, p16, inhibits CDK4) | This ARF product functions as a stabilizer of the tumor suppressor protein p53 as it can interact with, and sequester, MDM1, a protein responsible for the degradation of p53. It has a common functionality in cell cycle G1 control.       |
| CEBPB  | CCAAT/enhancer binding protein (C/EBP), beta                        | This protein is important in the regulation of genes involved in immune and inflammatory responses. It can also bind the promoter and upstream element and stimulate the expression of the collagen type I gene.                             |
| CFLAR  | CASP8 and FADD-like apoptosis regulator                             |                                                                                                                                                                                                                                              |
| CHUK   | conserved helix-loop-helix ubiquitous kinase                        | This protein phosphorylates sites that trigger the degradation of the inhibitor via the ubiquitination pathway, thereby activating the transcription factor.                                                                                 |
| CREB1  | cAMP responsive element binding protein 1                           | This protein induces transcription of genes in response to hormonal stimulation of the cAMP pathway.                                                                                                                                         |
| CREBBP | CREB binding protein                                                | This protein binds to cAMP-response element binding protein (CREB), and plays critical roles in embryonic development, growth control, and homeostasis by coupling chromatin remodeling to transcription factor recognition.                 |
| CTSS   | cathepsin S                                                         | This protein may participate in the degradation of antigenic proteins to peptides for presentation on MHC class II molecules. It can also function as an elastase over a broad pH range in alveolar macrophages.                             |
| CXCR4  | chemokine (C-X-C motif) receptor 4                                  | This protein acts with the CD4 protein to support HIV entry into cells and is also highly expressed in breast cancer cells.                                                                                                                  |
| CYLD   | cyliindromatosis (turban tumor syndrome)                            | This protein functions as a deubiquitinating enzyme.                                                                                                                                                                                         |
| CYTIP  | cytohesin 1 interacting protein                                     | This protein modulates the activation of ARF genes by CYTH1. It interacts with CYTH1 and SNX27 proteins and may act to sequester CYTH1 protein in the cytoplasm.                                                                             |

|         |                                                                                                                |                                                                                                                                                                                                                                                                                                                                              |
|---------|----------------------------------------------------------------------------------------------------------------|----------------------------------------------------------------------------------------------------------------------------------------------------------------------------------------------------------------------------------------------------------------------------------------------------------------------------------------------|
| DDR1    | discoidin domain receptor tyrosine kinase 1                                                                    | The protein encoded by this gene is a RTK that is widely expressed in normal and transformed epithelial cells and is activated by various types of collagen.                                                                                                                                                                                 |
| DICER1  | dicer 1, ribonuclease type III                                                                                 | This ribonuclease is required by the RNA interference and small temporal RNA pathways to produce the active small RNA component that represses gene expression.                                                                                                                                                                              |
| EGR1    | early growth response 1                                                                                        | This protein is a transcriptional regulator required for differentiation and mitogenesis.                                                                                                                                                                                                                                                    |
| EIF2AK1 | eukaryotic translation initiation factor 2-alpha kinase 1                                                      | The protein encoded by this gene acts at the level of translation initiation to downregulate protein synthesis in response to stress.                                                                                                                                                                                                        |
| ERBB2   | v-erb-b2 erythroblastic leukemia viral oncogene homolog 2, neuro/glioblastoma derived oncogene homolog (avian) | This protein binds to other ligand-bound EGF receptor family members to form a heterodimer, stabilizing ligand binding and enhancing kinase-mediated activation of downstream signalling pathways, such as those involving mitogen-activated protein kinase and phosphatidylinositol-3 kinase.                                               |
| ETV6    | ets variant 6                                                                                                  | This gene encodes an ETS family transcription factor that it is required for hematopoiesis and maintenance of the developing vascular network.                                                                                                                                                                                               |
| FADD    | Fas (TNFRSF6)-associated via death domain                                                                      | The protein encoded by this gene is an adaptor molecule that interacts with various cell surface receptors and mediates cell apoptotic signals.                                                                                                                                                                                              |
| FAS     | Fas (TNF receptor superfamily, member 6)                                                                       | This protein has been shown to play a central role in the physiological regulation of programmed cell death, and has been implicated in the pathogenesis of various malignancies and diseases of the immune system. This receptor is found to be involved in transducing the proliferating signals in normal diploid fibroblast and T cells. |
| FCGR2A  | Fc fragment of IgG, low affinity IIa, receptor (CD32)                                                          | This protein is a cell surface receptor found on phagocytic cells such as macrophages and neutrophils, and is involved in the process of phagocytosis and clearing of immune complexes.                                                                                                                                                      |
| GCNT1   | glucosaminyl (N-acetyl) transferase 1, core 2 (beta-1,6-N-acetylglucosaminyltransferase)                       | This protein is essential to the formation of Gal beta 1-3(GlcNAc beta 1-6)GalNAc structures and the core 2 O-glycan branch.                                                                                                                                                                                                                 |
| GSTP1   | glutathione S-transferase pi 1                                                                                 | This GST family member functions in xenobiotic metabolism and play a role in susceptibility to cancer, and other diseases.                                                                                                                                                                                                                   |
| HEXB    | hexosaminidase B (beta polypeptide)                                                                            | Hexosaminidase B catalyzes the degradation of the ganglioside GM2, and other molecules containing terminal N-acetyl hexosamines.                                                                                                                                                                                                             |
| HSP90B1 | heat shock protein 90kDa beta (Grp94), member 1                                                                | HSP90 proteins play roles in folding newly synthesized proteins or stabilizing and refolding denatured proteins after stress.                                                                                                                                                                                                                |
| ICAM1   | intercellular adhesion molecule 1                                                                              | This gene encodes a cell surface glycoprotein which is typically expressed on endothelial cells and cells of the immune system.                                                                                                                                                                                                              |
| ICOSLG  | inducible T-cell co-stimulator ligand                                                                          |                                                                                                                                                                                                                                                                                                                                              |
| IFNAR1  | interferon (alpha, beta and omega) receptor 1                                                                  | Binding and activation of this receptor stimulates Janus protein kinases, it also functions as an antiviral factor.                                                                                                                                                                                                                          |

|        |                                                                    |                                                                                                                                                                                                                                                               |
|--------|--------------------------------------------------------------------|---------------------------------------------------------------------------------------------------------------------------------------------------------------------------------------------------------------------------------------------------------------|
| IFNGR1 | interferon gamma receptor 1                                        | This gene encodes the ligand-binding chain (alpha) of the gamma interferon receptor.                                                                                                                                                                          |
| IGF2   | insulin-like growth factor 2 (somatomedin A)                       | This gene encodes a member of the insulin family of polypeptide growth factors that is involved in development and growth.                                                                                                                                    |
| IGF2R  | insulin-like growth factor 2 receptor                              | This receptor functions in the intracellular trafficking of lysosomal enzymes, the activation of transforming growth factor beta, and the degradation of IGF2.                                                                                                |
| IL8    | interleukin 8                                                      | This chemokine, one of the major mediators of the inflammatory response, functions as a chemoattractant, and is also a potent angiogenic factor.                                                                                                              |
| IL2RG  | interleukin 2 receptor, gamma (severe combined immunodeficiency)   | The interleukin 2 (IL2) receptor gamma chain (IL2RG), an important signalling component of many interleukin receptors (IL2,IL4,IL7,IL9, and IL15).                                                                                                            |
| IL4R   | interleukin 4 receptor                                             | This protein can bind interleukin 4 to promote differentiation of Th2 cells, can be produced by an alternate splice variant or by proteolysis of the membrane-bound protein, and can inhibit IL4-mediated cell proliferation and IL5 upregulation by T-cells. |
| IL7R   | interleukin 7 receptor                                             | This protein has been shown to play a critical role in the V(D)J recombination during lymphocyte development, and to control the accessibility of the TCR gamma locus by STAT5 and histone acetylation.                                                       |
| IRF1   | interferon regulatory factor 1                                     | IRF1 is a transcription activator of genes induced by interferons alpha, beta, and gamma. It also plays roles in regulating apoptosis and tumor-suppression.                                                                                                  |
| IRF2   | interferon regulatory factor 2                                     | IRF2 competitively inhibits the IRF1-mediated transcriptional activation of interferons alpha and beta, and presumably other genes that employ IRF1 for transcription activation. However, IRF2 also functions as a transcriptional activator of histone H4.  |
| ISG15  | ISG15 ubiquitin-like modifier                                      | G1P2 is a ubiquitin-like protein that becomes conjugated to many cellular proteins upon activation by interferon-alpha (IFNA; MIM 147660) and -beta (IFNB; MIM 147640).                                                                                       |
| ITGAM  | integrin, alpha M (complement component 3 receptor 3 subunit)      | The alpha M beta 2 integrin is important in the adherence of neutrophils and monocytes to stimulated endothelium, and also in the phagocytosis of complement coated particles.                                                                                |
| ITGB2  | integrin, beta 2 (complement component 3 receptor 3 and 4 subunit) | Integrins are known to participate in cell adhesion as well as cell-surface mediated signalling.                                                                                                                                                              |
| KLF4   | Kruppel-like factor 4 (gut)                                        |                                                                                                                                                                                                                                                               |
| LDLR   | low density lipoprotein receptor                                   | Low density lipoprotein (LDL) is taken into the cell ending up in lysosomes where it is degraded and the cholesterol is made available for repression of microsomal enzyme HMG CoA reductase, the rate-limiting step in cholesterol synthesis.                |
| LGALS3 | lectin, galactoside-binding, soluble, 3                            |                                                                                                                                                                                                                                                               |
| LGALS8 | lectin, galactoside-binding, soluble, 8                            | This gene is widely expressed in tumoral tissues and seems to be involved in integrin-like cell interactions.                                                                                                                                                 |
| LSP1   | lymphocyte-specific protein 1                                      | The protein may regulate neutrophil motility, adhesion to fibrinogen matrix proteins, and transendothelial migration.                                                                                                                                         |
| LYN    | v-yes-1 Yamaguchi sarcoma viral related oncogene homolog           |                                                                                                                                                                                                                                                               |

|          |                                                                                      |                                                                                                                                                                                                                                                                                                                         |
|----------|--------------------------------------------------------------------------------------|-------------------------------------------------------------------------------------------------------------------------------------------------------------------------------------------------------------------------------------------------------------------------------------------------------------------------|
| LYST     | lysosomal trafficking regulator                                                      | This protein regulates intracellular protein trafficking to and from the lysosome.                                                                                                                                                                                                                                      |
| MAP3K7   | mitogen-activated protein kinase kinase kinase 7                                     | This kinase mediates the signaling transduction induced by TGF beta and morphogenetic protein (BMP), and controls a variety of cell functions including transcription regulation and apoptosis. This kinase can play a role in the cell response to environmental stresses.                                             |
| MAPK14   | mitogen-activated protein kinase 14                                                  | This kinase may be involved in stress related transcription and cell cycle regulation, as well as in genotoxic stress response.                                                                                                                                                                                         |
| MAPKAPK2 | mitogen-activated protein kinase-activated protein kinase 2                          | This kinase is known to be involved in many cellular processes including stress and inflammatory responses, nuclear export, gene expression regulation and cell proliferation.                                                                                                                                          |
| MDM2     | Mdm2 p53 binding protein homolog (mouse)                                             | This protein is a nuclear phosphoprotein that binds and inhibits transactivation by tumor protein p53, as part of an autoregulatory negative feedback loop. It also affects the cell cycle, apoptosis, and tumorigenesis through interactions with other proteins, including retinoblastoma 1 and ribosomal protein L5. |
| MED1     | mediator complex subunit 1                                                           | The protein encoded by this gene is a subunit of the CRSP (cofactor required for SP1 activation) complex, which, along with TFIID, is required for efficient activation by SP1. It also regulates p53-dependent apoptosis and it is essential for adipogenesis.                                                         |
| MEIS1    | Meis homeobox 1                                                                      | Homeobox genes, of which the most well-characterized category is represented by the HOX genes, play a crucial role in normal development. In addition, several homeoproteins are involved in neoplasia.                                                                                                                 |
| MPZ      | myelin protein zero                                                                  | This gene encodes a major structural protein of peripheral myelin.                                                                                                                                                                                                                                                      |
| NFKB1    | nuclear factor of kappa light polypeptide gene enhancer in B-cells 1                 | NFKB is a transcription regulator that is activated by various intra- and extra-cellular stimuli such as cytokines, oxidant-free radicals, ultraviolet irradiation, and bacterial or viral products.                                                                                                                    |
| NFKB2    | nuclear factor of kappa light polypeptide gene enhancer in B-cells 2 (p49/p100)      | NFKB has been detected in numerous cell types that express cytokines, chemokines, growth factors, cell adhesion molecules, and some acute phase proteins in health and in various disease states. NFKB is activated by a wide variety of stimuli.                                                                       |
| NP       | nucleoside phosphorylase                                                             | This protein is an enzyme which reversibly catalyzes the phosphorolysis of purine nucleosides.                                                                                                                                                                                                                          |
| NPM1     | nucleophosmin (nucleolar phosphoprotein B23, numatrin)                               | NPM1 is implicated in multiple functions, including ribosomal protein assembly and transport, control of centrosome duplication, and regulation of the tumor suppressor ARF (MIM 600160).                                                                                                                               |
| NR4A1    | nuclear receptor subfamily 4, group A, member 1                                      | This protein acts as a nuclear transcription factor. Translocation of the protein from the nucleus to mitochondria induces apoptosis.                                                                                                                                                                                   |
| PDE4B    | phosphodiesterase 4B, cAMP-specific (phosphodiesterase E4 dunce homolog, Drosophila) | This protein specifically hydrolyzes cAMP.                                                                                                                                                                                                                                                                              |
| PIK3AP1  | phosphoinositide-3-kinase adaptor protein 1                                          |                                                                                                                                                                                                                                                                                                                         |

|          |                                                                                                                  |                                                                                                                                                                                                                                                                                      |
|----------|------------------------------------------------------------------------------------------------------------------|--------------------------------------------------------------------------------------------------------------------------------------------------------------------------------------------------------------------------------------------------------------------------------------|
| PIK3R1   | phosphoinositide-3-kinase, regulatory subunit 1 (alpha)                                                          | Phosphatidylinositol 3-kinase plays an important role in the metabolic actions of insulin.                                                                                                                                                                                           |
| PLSCR1   | phospholipid scramblase 1                                                                                        |                                                                                                                                                                                                                                                                                      |
| PML      | promyelocytic leukemia                                                                                           | This phosphoprotein localizes to nuclear bodies where it functions as a transcription factor and tumor suppressor. Its expression is cell-cycle related and it regulates the p53 response to oncogenic signals.                                                                      |
| POU2F1   | POU class 2 homeobox 1                                                                                           |                                                                                                                                                                                                                                                                                      |
| PRKCE    | protein kinase C, epsilon                                                                                        | This kinase is involved in neuron channel activation, apoptosis, cardioprotection from ischemia, heat shock response, and insulin exocytosis. It may also be important for LPS-mediated signaling in activated macrophages and may play a role in controlling anxiety-like behavior. |
| PRNP     | prion protein                                                                                                    | This protein is a membrane glycosylphosphatidylinositol-anchored glycoprotein that tends to aggregate into rod-like structures.                                                                                                                                                      |
| PTPN2    | protein tyrosine phosphatase, non-receptor type 2                                                                | This protein regulates a variety of cellular processes including cell growth, differentiation, mitotic cycle, and oncogenic transformation.                                                                                                                                          |
| PTPN6    | protein tyrosine phosphatase, non-receptor type 6                                                                | This protein is expressed primarily in hematopoietic cells, and functions as an important regulator of multiple signaling pathways in hematopoietic cells. It dephosphorylates a wide spectrum of phospho-proteins involved in hematopoietic cell signaling.                         |
| RBL2     | retinoblastoma-like 2 (p130)                                                                                     |                                                                                                                                                                                                                                                                                      |
| RBM15    | RNA binding motif protein 15                                                                                     | Members of the SPEN (Split-end) family of proteins, including RBM15, have repressor function in several signaling pathways and may bind to RNA through interaction with spliceosome components.                                                                                      |
| RHOH     | ras homolog gene family, member H                                                                                | This protein is transcribed only in hemopoietic cells.                                                                                                                                                                                                                               |
| RUNX1    | runt-related transcription factor 1                                                                              | This protein is thought to be involved in the development of normal hematopoiesis.                                                                                                                                                                                                   |
| SEMA4D   | sema domain, immunoglobulin domain (Ig), transmembrane domain (TM) and short cytoplasmic domain, (semaphorin) 4D |                                                                                                                                                                                                                                                                                      |
| SERPINA1 | serpin peptidase inhibitor, clade A (alpha-1 antiproteinase, antitrypsin), member 1                              | This protein is a serine protease inhibitor whose targets include elastase, plasmin, thrombin, trypsin, chymotrypsin, and plasminogen activator.                                                                                                                                     |
| SHC1     | SHC (Src homology 2 domain containing) transforming protein 1                                                    |                                                                                                                                                                                                                                                                                      |
| SOD1     | superoxide dismutase 1, soluble                                                                                  | This protein binds copper and zinc ions and is one of two isozymes responsible for destroying free superoxide radicals in the body.                                                                                                                                                  |

|        |                                                                                   |                                                                                                                                                                                                                                                                                                                                                    |
|--------|-----------------------------------------------------------------------------------|----------------------------------------------------------------------------------------------------------------------------------------------------------------------------------------------------------------------------------------------------------------------------------------------------------------------------------------------------|
| SPP1   | secreted phosphoprotein 1                                                         |                                                                                                                                                                                                                                                                                                                                                    |
| SPRED2 | sprouty-related, EVH1 domain containing 2                                         | SPRED2 is a member of the Sprouty (see SPRY1; MIM 602465)/SPRED family of proteins that regulate growth factor-induced activation of the MAP kinase cascade (see MAPK1; MIM 176948).                                                                                                                                                               |
| SRF    | serum response factor (c-fos serum response element-binding transcription factor) | This protein stimulates both cell proliferation and differentiation. It participates in cell cycle regulation, apoptosis, cell growth, and cell differentiation.                                                                                                                                                                                   |
| STAM2  | signal transducing adaptor molecule (SH3 domain and ITAM motif) 2                 | This protein is thought to exhibit compensatory effects on the signaling pathway downstream of JAK kinases upon cytokine stimulation.                                                                                                                                                                                                              |
| STAT1  | signal transducer and activator of transcription 1, 91kDa                         | This protein mediates the expression of a variety of genes, which is thought to be important for cell viability in response to different cell stimuli and pathogens.                                                                                                                                                                               |
| STAT3  | signal transducer and activator of transcription 3 (acute-phase response factor)  | This protein mediates the expression of a variety of genes in response to cell stimuli, and thus plays a key role in many cellular processes such as cell growth and apoptosis.                                                                                                                                                                    |
| STAT6  | signal transducer and activator of transcription 6, interleukin-4 induced         | This protein plays a central role in exerting IL4 mediated biological responses. It is found to induce the expression of BCL2L1/BCL-X(L), which is responsible for the anti-apoptotic activity of IL4. It also plays a role in differentiation of T helper 2 (Th2) cells, expression of cell surface markers, and class switch of immunoglobulins. |
| STAT5B | signal transducer and activator of transcription 5B                               | This protein mediates the signal transduction triggered by various cell ligands, such as IL2, IL4, CSF1, and different growth hormones. It is involved in TCR signaling, apoptosis, adult mammary gland development, and sexual dimorphism of liver gene expression.                                                                               |
| STK17B | serine/threonine kinase 17b                                                       |                                                                                                                                                                                                                                                                                                                                                    |
| STRA13 | stimulated by retinoic acid 13 homolog (mouse)                                    |                                                                                                                                                                                                                                                                                                                                                    |
| TAP1   | transporter 1, ATP-binding cassette, sub-family B (MDR/TAP)                       | This protein is involved in the pumping of degraded cytosolic peptides across the endoplasmic reticulum into the membrane-bound compartment where class I molecules assemble.                                                                                                                                                                      |
| TGFBR2 | transforming growth factor, beta receptor II (70/80kDa)                           | This receptor regulates the transcription of a subset of genes related to cell proliferation.                                                                                                                                                                                                                                                      |
| THBS1  | thrombospondin 1                                                                  | This protein is an adhesive glycoprotein that mediates cell-to-cell and cell-to-matrix interactions. It plays roles in platelet aggregation, angiogenesis, and tumorigenesis.                                                                                                                                                                      |
| TLR2   | toll-like receptor 2                                                              | This protein encoded by this gene is a member of the Toll-like receptor (TLR) family which plays a fundamental role in pathogen recognition and activation of innate immunity. It mediates host response to Gram-positive bacteria.                                                                                                                |
| TP53   | tumor protein p53                                                                 | This gene encodes tumor protein p53, which responds to diverse cellular stresses to regulate target genes that induce cell cycle arrest, apoptosis, senescence, DNA repair, or changes in metabolism.                                                                                                                                              |
| TXNIP  | thioredoxin interacting protein                                                   |                                                                                                                                                                                                                                                                                                                                                    |

---

Hematological System Development and Function: Quantity: Quantity of Leukocytes (1.86E-04), Quantity of Mononuclear Leukocytes (1.00E-05)

|        |                                                                     |                                                                                                                                                                                                                                              |
|--------|---------------------------------------------------------------------|----------------------------------------------------------------------------------------------------------------------------------------------------------------------------------------------------------------------------------------------|
| AFF1   | AF4/FMR2 family, member 1                                           |                                                                                                                                                                                                                                              |
| AHR    | aryl hydrocarbon receptor                                           | This protein regulates biological responses to planar aromatic hydrocarbons and xenobiotic-metabolizing enzymes such as cytochrome P450.                                                                                                     |
| AKT1   | v-akt murine thymoma viral oncogene homolog 1                       | In the developing nervous system AKT is a critical mediator of growth factor-induced neuronal survival. Survival factors can suppress apoptosis.                                                                                             |
| B2M    | beta-2-microglobulin                                                | Beta-2-microglobulin is a serum protein found in association with the major histocompatibility complex (MHC) class I heavy chain on the surface of nearly all nucleated cells.                                                               |
| C5AR1  | complement component 5a receptor 1                                  |                                                                                                                                                                                                                                              |
| CARM1  | coactivator-associated arginine methyltransferase 1                 | CARM1 is involved in the process of protein arginine methylation which has been implicated in signal transduction, metabolism of nascent pre-RNA, and transcriptional activation.                                                            |
| CCL3   | chemokine (C-C motif) ligand 3                                      | Macrophage inflammatory protein-1 is a so-called monokine that is involved in the acute inflammatory state in the recruitment and activation of polymorphonuclear leukocytes.                                                                |
| CD69   | CD69 molecule                                                       | Expression of this protein is induced upon activation of T lymphocytes, and may play a role in proliferation. It may act to transmit signals in natural killer cells and platelets.                                                          |
| CD81   | CD81 molecule                                                       | This protein appears to promote muscle cell fusion and support myotube maintenance, and may be involved in signal transduction.                                                                                                              |
| CD83   | CD83 molecule                                                       |                                                                                                                                                                                                                                              |
| CDKN1A | cyclin-dependent kinase inhibitor 1A (p21, Cip1)                    | This protein functions as a regulator of cell cycle progression at G1. It also plays a regulatory role in S phase DNA replication and DNA damage repair, and may be instrumental in the execution of apoptosis following caspase activation. |
| CDKN2A | cyclin-dependent kinase inhibitor 2A (melanoma, p16, inhibits CDK4) | This ARF product functions as a stabilizer of the tumor suppressor protein p53 as it can interact with, and sequester, MDM1, a protein responsible for the degradation of p53. It has a common functionality in cell cycle G1 control.       |
| CEBPB  | CCAAT/enhancer binding protein (C/EBP), beta                        | This protein is important in the regulation of genes involved in immune and inflammatory responses. It can also bind the promoter and upstream element and stimulate the expression of the collagen type I gene.                             |
| CFLAR  | CASP8 and FADD-like apoptosis regulator                             |                                                                                                                                                                                                                                              |
| CHUK   | conserved helix-loop-helix ubiquitous kinase                        | This protein phosphorylates sites that trigger the degradation of the inhibitor via the ubiquitination pathway, thereby activating the transcription factor.                                                                                 |

|        |                                                                                                                |                                                                                                                                                                                                                                                                                                                                              |
|--------|----------------------------------------------------------------------------------------------------------------|----------------------------------------------------------------------------------------------------------------------------------------------------------------------------------------------------------------------------------------------------------------------------------------------------------------------------------------------|
| CREB1  | cAMP responsive element binding protein 1                                                                      | This protein induces transcription of genes in response to hormonal stimulation of the cAMP pathway.                                                                                                                                                                                                                                         |
| CREBBP | CREB binding protein                                                                                           | This protein binds to cAMP-response element binding protein (CREB), and plays critical roles in embryonic development, growth control, and homeostasis by coupling chromatin remodeling to transcription factor recognition.                                                                                                                 |
| CTSS   | cathepsin S                                                                                                    | This protein may participate in the degradation of antigenic proteins to peptides for presentation on MHC class II molecules. It can also function as an elastase over a broad pH range in alveolar macrophages.                                                                                                                             |
| CXCR4  | chemokine (C-X-C motif) receptor 4                                                                             | This protein acts with the CD4 protein to support HIV entry into cells and is also highly expressed in breast cancer cells.                                                                                                                                                                                                                  |
| CYLD   | cyldromatosis (turban tumor syndrome)                                                                          | This protein functions as a deubiquitinating enzyme.                                                                                                                                                                                                                                                                                         |
| CYTIP  | cytohesin 1 interacting protein                                                                                | This protein modulates the activation of ARF genes by CYTH1. It interacts with CYTH1 and SNX27 proteins and may act to sequester CYTH1 protein in the cytoplasm.                                                                                                                                                                             |
| DDR1   | discoidin domain receptor tyrosine kinase 1                                                                    | The protein encoded by this gene is a RTK that is widely expressed in normal and transformed epithelial cells and is activated by various types of collagen.                                                                                                                                                                                 |
| DICER1 | dicer 1, ribonuclease type III                                                                                 | This ribonuclease is required by the RNA interference and small temporal RNA pathways to produce the active small RNA component that represses gene expression.                                                                                                                                                                              |
| EGR1   | early growth response 1                                                                                        | This protein is a transcriptional regulator required for differentiation and mitogenesis.                                                                                                                                                                                                                                                    |
| ERBB2  | v-erb-b2 erythroblastic leukemia viral oncogene homolog 2, neuro/glioblastoma derived oncogene homolog (avian) | This protein binds to other ligand-bound EGF receptor family members to form a heterodimer, stabilizing ligand binding and enhancing kinase-mediated activation of downstream signalling pathways, such as those involving mitogen-activated protein kinase and phosphatidylinositol-3 kinase.                                               |
| ETV6   | ets variant 6                                                                                                  | This gene encodes an ETS family transcription factor that it is required for hematopoiesis and maintenance of the developing vascular network.                                                                                                                                                                                               |
| FADD   | Fas (TNFRSF6)-associated via death domain                                                                      | The protein encoded by this gene is an adaptor molecule that interacts with various cell surface receptors and mediates cell apoptotic signals.                                                                                                                                                                                              |
| FAS    | Fas (TNF receptor superfamily, member 6)                                                                       | This protein has been shown to play a central role in the physiological regulation of programmed cell death, and has been implicated in the pathogenesis of various malignancies and diseases of the immune system. This receptor is found to be involved in transducing the proliferating signals in normal diploid fibroblast and T cells. |
| FCGR2A | Fc fragment of IgG, low affinity IIa, receptor (CD32)                                                          | This protein is a cell surface receptor found on phagocytic cells such as macrophages and neutrophils, and is involved in the process of phagocytosis and clearing of immune complexes.                                                                                                                                                      |
| GCNT1  | glucosaminyl (N-acetyl) transferase 1, core 2 (beta-1,6-N-acetylglucosaminyltransferase)                       | This protein is essential to the formation of Gal beta 1-3(GlcNAc beta 1-6)GalNAc structures and the core 2 O-glycan branch.                                                                                                                                                                                                                 |
| GSTP1  | glutathione S-transferase pi 1                                                                                 | This GST family member functions in xenobiotic metabolism and play a role in susceptibility to cancer, and other diseases.                                                                                                                                                                                                                   |

|         |                                                                    |                                                                                                                                                                                                                                                              |
|---------|--------------------------------------------------------------------|--------------------------------------------------------------------------------------------------------------------------------------------------------------------------------------------------------------------------------------------------------------|
| HEXB    | hexosaminidase B (beta polypeptide)                                | Hexosaminidase B catalyzes the degradation of the ganglioside GM2, and other molecules containing terminal N-acetyl hexosamines.                                                                                                                             |
| HSP90B1 | heat shock protein 90kDa beta (Grp94), member 1                    | HSP90 proteins play roles in folding newly synthesized proteins or stabilizing and refolding denatured proteins after stress.                                                                                                                                |
| ICAM1   | intercellular adhesion molecule 1                                  | This gene encodes a cell surface glycoprotein which is typically expressed on endothelial cells and cells of the immune system.                                                                                                                              |
| ICOSLG  | inducible T-cell co-stimulator ligand                              |                                                                                                                                                                                                                                                              |
| IFNAR1  | interferon (alpha, beta and omega) receptor 1                      | Binding and activation of this receptor stimulates Janus protein kinases, it also functions as an antiviral factor.                                                                                                                                          |
| IFNGR1  | interferon gamma receptor 1                                        | This gene encodes the ligand-binding chain (alpha) of the gamma interferon receptor.                                                                                                                                                                         |
| IGF2    | insulin-like growth factor 2 (somatomedin A)                       | This gene encodes a member of the insulin family of polypeptide growth factors that is involved in development and growth.                                                                                                                                   |
| IGF2R   | insulin-like growth factor 2 receptor                              | This receptor functions in the intracellular trafficking of lysosomal enzymes, the activation of transforming growth factor beta, and the degradation of IGF2.                                                                                               |
| IL8     | interleukin 8                                                      | This chemokine, one of the major mediators of the inflammatory response, functions as a chemoattractant, and is also a potent angiogenic factor.                                                                                                             |
| IL2RG   | interleukin 2 receptor, gamma (severe combined immunodeficiency)   | The interleukin 2 (IL2) receptor gamma chain (IL2RG), an important signalling component of many interleukin receptors (IL2,IL4,IL7,IL9, and IL15).                                                                                                           |
| IL7R    | interleukin 7 receptor                                             | This protein has been shown to play a critical role in the V(D)J recombination during lymphocyte development, and to control the accessibility of the TCR gamma locus by STAT5 and histone acetylation.                                                      |
| IRF1    | interferon regulatory factor 1                                     | IRF1 is a transcription activator of genes induced by interferons alpha, beta, and gamma. It also plays roles in regulating apoptosis and tumor-suppression.                                                                                                 |
| IRF2    | interferon regulatory factor 2                                     | IRF2 competitively inhibits the IRF1-mediated transcriptional activation of interferons alpha and beta, and presumably other genes that employ IRF1 for transcription activation. However, IRF2 also functions as a transcriptional activator of histone H4. |
| ISG15   | ISG15 ubiquitin-like modifier                                      | G1P2 is a ubiquitin-like protein that becomes conjugated to many cellular proteins upon activation by interferon-alpha (IFNA; MIM 147660) and -beta (IFNB; MIM 147640).                                                                                      |
| ITGAM   | integrin, alpha M (complement component 3 receptor 3 subunit)      | The alpha M beta 2 integrin is important in the adherence of neutrophils and monocytes to stimulated endothelium, and also in the phagocytosis of complement coated particles.                                                                               |
| ITGB2   | integrin, beta 2 (complement component 3 receptor 3 and 4 subunit) | Integrins are known to participate in cell adhesion as well as cell-surface mediated signalling.                                                                                                                                                             |
| KLF4    | Kruppel-like factor 4 (gut)                                        |                                                                                                                                                                                                                                                              |
| LDLR    | low density lipoprotein receptor                                   | Low density lipoprotein (LDL) is taken into the cell ending up in lysosomes where it is degraded and the cholesterol is made available for repression of microsomal enzyme HMG CoA reductase, the rate-limiting step in cholesterol synthesis.               |
| LGALS3  | lectin, galactoside-binding, soluble, 3                            |                                                                                                                                                                                                                                                              |

|          |                                                                                      |                                                                                                                                                                                                                                                                                                                         |
|----------|--------------------------------------------------------------------------------------|-------------------------------------------------------------------------------------------------------------------------------------------------------------------------------------------------------------------------------------------------------------------------------------------------------------------------|
| LGALS8   | lectin, galactoside-binding, soluble, 8                                              | This gene is widely expressed in tumoral tissues and seems to be involved in integrin-like cell interactions.                                                                                                                                                                                                           |
| LSP1     | lymphocyte-specific protein 1                                                        | The protein may regulate neutrophil motility, adhesion to fibrinogen matrix proteins, and transendothelial migration.                                                                                                                                                                                                   |
| LYN      | v-yes-1 Yamaguchi sarcoma viral related oncogene homolog                             |                                                                                                                                                                                                                                                                                                                         |
| LYST     | lysosomal trafficking regulator                                                      | This protein regulates intracellular protein trafficking to and from the lysosome.                                                                                                                                                                                                                                      |
| MAP3K7   | mitogen-activated protein kinase kinase kinase 7                                     | This kinase mediates the signaling transduction induced by TGF beta and morphogenetic protein (BMP), and controls a variety of cell functions including transcription regulation and apoptosis. This kinase can play a role in the cell response to environmental stresses.                                             |
| MAPKAPK2 | mitogen-activated protein kinase-activated protein kinase 2                          | This kinase is known to be involved in many cellular processes including stress and inflammatory responses, nuclear export, gene expression regulation and cell proliferation.                                                                                                                                          |
| MDM2     | Mdm2 p53 binding protein homolog (mouse)                                             | This protein is a nuclear phosphoprotein that binds and inhibits transactivation by tumor protein p53, as part of an autoregulatory negative feedback loop. It also affects the cell cycle, apoptosis, and tumorigenesis through interactions with other proteins, including retinoblastoma 1 and ribosomal protein L5. |
| MEIS1    | Meis homeobox 1                                                                      | Homeobox genes, of which the most well-characterized category is represented by the HOX genes, play a crucial role in normal development. In addition, several homeoproteins are involved in neoplasia.                                                                                                                 |
| MPZ      | myelin protein zero                                                                  | This gene encodes a major structural protein of peripheral myelin.                                                                                                                                                                                                                                                      |
| NFKB1    | nuclear factor of kappa light polypeptide gene enhancer in B-cells 1                 | NFKB is a transcription regulator that is activated by various intra- and extra-cellular stimuli such as cytokines, oxidant-free radicals, ultraviolet irradiation, and bacterial or viral products.                                                                                                                    |
| NFKB2    | nuclear factor of kappa light polypeptide gene enhancer in B-cells 2 (p49/p100)      | NFKB has been detected in numerous cell types that express cytokines, chemokines, growth factors, cell adhesion molecules, and some acute phase proteins in health and in various disease states. NFKB is activated by a wide variety of stimuli.                                                                       |
| NP       | nucleoside phosphorylase                                                             | This protein is an enzyme which reversibly catalyzes the phosphorolysis of purine nucleosides.                                                                                                                                                                                                                          |
| NPM1     | nucleophosmin (nucleolar phosphoprotein B23, numatrin)                               | NPM1 is implicated in multiple functions, including ribosomal protein assembly and transport, control of centrosome duplication, and regulation of the tumor suppressor ARF (MIM 600160).                                                                                                                               |
| NR4A1    | nuclear receptor subfamily 4, group A, member 1                                      | This protein acts as a nuclear transcription factor. Translocation of the protein from the nucleus to mitochondria induces apoptosis.                                                                                                                                                                                   |
| PDE4B    | phosphodiesterase 4B, cAMP-specific (phosphodiesterase E4 dunce homolog, Drosophila) | This protein specifically hydrolyzes cAMP.                                                                                                                                                                                                                                                                              |
| PIK3AP1  | phosphoinositide-3-kinase adaptor protein 1                                          |                                                                                                                                                                                                                                                                                                                         |

|          |                                                                                                                  |                                                                                                                                                                                                                                                                                      |
|----------|------------------------------------------------------------------------------------------------------------------|--------------------------------------------------------------------------------------------------------------------------------------------------------------------------------------------------------------------------------------------------------------------------------------|
| PIK3R1   | phosphoinositide-3-kinase, regulatory subunit 1 (alpha)                                                          | Phosphatidylinositol 3-kinase plays an important role in the metabolic actions of insulin.                                                                                                                                                                                           |
| PLSCR1   | phospholipid scramblase 1                                                                                        |                                                                                                                                                                                                                                                                                      |
| PML      | promyelocytic leukemia                                                                                           | This phosphoprotein localizes to nuclear bodies where it functions as a transcription factor and tumor suppressor. Its expression is cell-cycle related and it regulates the p53 response to oncogenic signals.                                                                      |
| PRKCE    | protein kinase C, epsilon                                                                                        | This kinase is involved in neuron channel activation, apoptosis, cardioprotection from ischemia, heat shock response, and insulin exocytosis. It may also be important for LPS-mediated signaling in activated macrophages and may play a role in controlling anxiety-like behavior. |
| PRNP     | prion protein                                                                                                    | This protein is a membrane glycosylphosphatidylinositol-anchored glycoprotein that tends to aggregate into rod-like structures.                                                                                                                                                      |
| PTPN2    | protein tyrosine phosphatase, non-receptor type 2                                                                | This protein regulates a variety of cellular processes including cell growth, differentiation, mitotic cycle, and oncogenic transformation.                                                                                                                                          |
| PTPN6    | protein tyrosine phosphatase, non-receptor type 6                                                                | This protein is expressed primarily in hematopoietic cells, and functions as an important regulator of multiple signaling pathways in hematopoietic cells. It dephosphorylates a wide spectrum of phospho-proteins involved in hematopoietic cell signaling.                         |
| RBL2     | retinoblastoma-like 2 (p130)                                                                                     |                                                                                                                                                                                                                                                                                      |
| RBM15    | RNA binding motif protein 15                                                                                     | Members of the SPEN (Split-end) family of proteins, including RBM15, have repressor function in several signaling pathways and may bind to RNA through interaction with spliceosome components.                                                                                      |
| RHOH     | ras homolog gene family, member H                                                                                | This protein is transcribed only in hemopoietic cells.                                                                                                                                                                                                                               |
| RUNX1    | runt-related transcription factor 1                                                                              | This protein is thought to be involved in the development of normal hematopoiesis.                                                                                                                                                                                                   |
| SEMA4D   | sema domain, immunoglobulin domain (Ig), transmembrane domain (TM) and short cytoplasmic domain, (semaphorin) 4D |                                                                                                                                                                                                                                                                                      |
| SERPINA1 | serpin peptidase inhibitor, clade A (alpha-1 antiproteinase, antitrypsin), member 1                              | This protein is a serine protease inhibitor whose targets include elastase, plasmin, thrombin, trypsin, chymotrypsin, and plasminogen activator.                                                                                                                                     |
| SHC1     | SHC (Src homology 2 domain containing) transforming protein 1                                                    |                                                                                                                                                                                                                                                                                      |
| SOD1     | superoxide dismutase 1, soluble                                                                                  | This protein binds copper and zinc ions and is one of two isozymes responsible for destroying free superoxide radicals in the body.                                                                                                                                                  |

|        |                                                                                   |                                                                                                                                                                                                                                                                                                                                                    |
|--------|-----------------------------------------------------------------------------------|----------------------------------------------------------------------------------------------------------------------------------------------------------------------------------------------------------------------------------------------------------------------------------------------------------------------------------------------------|
| SRF    | serum response factor (c-fos serum response element-binding transcription factor) | This protein stimulates both cell proliferation and differentiation. It participates in cell cycle regulation, apoptosis, cell growth, and cell differentiation.                                                                                                                                                                                   |
| STAM2  | signal transducing adaptor molecule (SH3 domain and ITAM motif) 2                 | This protein is thought to exhibit compensatory effects on the signaling pathway downstream of JAK kinases upon cytokine stimulation.                                                                                                                                                                                                              |
| STAT1  | signal transducer and activator of transcription 1, 91kDa                         | This protein mediates the expression of a variety of genes, which is thought to be important for cell viability in response to different cell stimuli and pathogens.                                                                                                                                                                               |
| STAT3  | signal transducer and activator of transcription 3 (acute-phase response factor)  | This protein mediates the expression of a variety of genes in response to cell stimuli, and thus plays a key role in many cellular processes such as cell growth and apoptosis.                                                                                                                                                                    |
| STAT6  | signal transducer and activator of transcription 6, interleukin-4 induced         | This protein plays a central role in exerting IL4 mediated biological responses. It is found to induce the expression of BCL2L1/BCL-X(L), which is responsible for the anti-apoptotic activity of IL4. It also plays a role in differentiation of T helper 2 (Th2) cells, expression of cell surface markers, and class switch of immunoglobulins. |
| STAT5B | signal transducer and activator of transcription 5B                               | This protein mediates the signal transduction triggered by various cell ligands, such as IL2, IL4, CSF1, and different growth hormones. It is involved in TCR signaling, apoptosis, adult mammary gland development, and sexual dimorphism of liver gene expression.                                                                               |
| STK17B | serine/threonine kinase 17b                                                       |                                                                                                                                                                                                                                                                                                                                                    |
| TAP1   | transporter 1, ATP-binding cassette, sub-family B (MDR/TAP)                       | This protein is involved in the pumping of degraded cytosolic peptides across the endoplasmic reticulum into the membrane-bound compartment where class I molecules assemble.                                                                                                                                                                      |
| TGFBR2 | transforming growth factor, beta receptor II (70/80kDa)                           | This receptor regulates the transcription of a subset of genes related to cell proliferation.                                                                                                                                                                                                                                                      |
| TLR2   | toll-like receptor 2                                                              | This protein encoded by this gene is a member of the Toll-like receptor (TLR) family which plays a fundamental role in pathogen recognition and activation of innate immunity. It mediates host response to Gram-positive bacteria.                                                                                                                |
| TP53   | tumor protein p53                                                                 | This gene encodes tumor protein p53, which responds to diverse cellular stresses to regulate target genes that induce cell cycle arrest, apoptosis, senescence, DNA repair, or changes in metabolism.                                                                                                                                              |
| TXNIP  | thioredoxin interacting protein                                                   |                                                                                                                                                                                                                                                                                                                                                    |

Hematological System  
Development and Function:  
Differentiation:  
Differentiation of Blood Cells  
(1.00E-05)

ADD1

adducin 1 (alpha)

Adducin binds with high affinity to Ca(2+)/calmodulin and is a substrate for protein kinases A and C.

|         |                                                                                                    |                                                                                                                                                                                                                                         |
|---------|----------------------------------------------------------------------------------------------------|-----------------------------------------------------------------------------------------------------------------------------------------------------------------------------------------------------------------------------------------|
| AKT1    | v-akt murine thymoma viral oncogene homolog 1                                                      | In the developing nervous system AKT is a critical mediator of growth factor-induced neuronal survival. Survival factors can suppress apoptosis.                                                                                        |
| AKT2    | v-akt murine thymoma viral oncogene homolog 2                                                      | This gene is a putative oncogene encoding a subfamily of serine/threonine kinases containing SH2-like (Src homology 2-like) domains. The encoded protein is a general protein kinase capable of phosphorylating several known proteins. |
| ALAS2   | aminolevulinic acid, delta-synthase 2                                                              | This protein catalyzes the first step in the heme biosynthetic pathway.                                                                                                                                                                 |
| AP3B1   | adaptor-related protein complex 3, beta 1 subunit                                                  | This gene encodes a protein that may play a role in organelle biogenesis associated with melanosomes, platelet dense granules, and lysosomes.                                                                                           |
| AP3D1   | adaptor-related protein complex 3, delta 1 subunit                                                 | The AP3D1 subunit is implicated in intracellular biogenesis and trafficking of pigment granules and platelet dense granules and neurotransmitter vesicles.                                                                              |
| APAF1   | apoptotic peptidase activating factor 1                                                            | This gene encodes a cytoplasmic protein that initiates apoptosis.                                                                                                                                                                       |
| BSG     | basigin (Ok blood group)                                                                           | This protein is a plasma membrane protein that is important in spermatogenesis, embryo implantation, neural network formation, and tumor progression.                                                                                   |
| CCL3    | chemokine (C-C motif) ligand 3                                                                     | Macrophage inflammatory protein-1 is a so-called monokine that is involved in the acute inflammatory state in the recruitment and activation of polymorphonuclear leukocytes.                                                           |
| CD300A  | CD300a molecule                                                                                    | The CMRF35 antigen (CMRF35A; MIM 606786), which was identified by reactivity with a monoclonal antibody, is present on monocytes, neutrophils, and some T and B lymphocytes.                                                            |
| CDC42   | cell division cycle 42 (GTP binding protein, 25kDa)                                                | This protein regulates signaling pathways that control diverse cellular functions including cell morphology, migration, endocytosis and cell cycle progression.                                                                         |
| CDKN2A  | cyclin-dependent kinase inhibitor 2A (melanoma, p16, inhibits CDK4)                                | This ARF product functions as a stabilizer of the tumor suppressor protein p53 as it can interact with, and sequester, MDM1, a protein responsible for the degradation of p53. It has a common functionality in cell cycle G1 control.  |
| CDKN2B  | cyclin-dependent kinase inhibitor 2B (p15, inhibits CDK4)                                          | This cyclin-dependent kinase functions as a cell growth regulator that controls cell cycle G1 progression.                                                                                                                              |
| CEBPD   | CCAAT/enhancer binding protein (C/EBP), delta                                                      | This protein is important in the regulation of genes involved in immune and inflammatory responses, and may be involved in the regulation of genes associated with activation and/or differentiation of macrophages.                    |
| CTBP1   | C-terminal binding protein 1                                                                       | This proteins can interact with a polycomb group protein complex which participates in regulation of gene expression during development.                                                                                                |
| DCLRE1C | DNA cross-link repair 1C (PSO2 homolog, S. cerevisiae)                                             | This nuclear protein is involved in V(D)J recombination and DNA repair.                                                                                                                                                                 |
| DICER1  | dicer 1, ribonuclease type III                                                                     | This ribonuclease is required by the RNA interference and small temporal RNA pathways to produce the active small RNA component that represses gene expression.                                                                         |
| EGFR    | epidermal growth factor receptor (erythroblastic leukemia viral (v-erb-b) oncogene homolog, avian) | Binding of this receptor to a ligand induces dimerization and tyrosine autophosphorylation and leads to cell proliferation.                                                                                                             |
| EGR1    | early growth response 1                                                                            | This protein is a transcriptional regulator required for differentiation and mitogenesis.                                                                                                                                               |

|          |                                                                  |                                                                                                                                                                                                                                                                                                                                              |
|----------|------------------------------------------------------------------|----------------------------------------------------------------------------------------------------------------------------------------------------------------------------------------------------------------------------------------------------------------------------------------------------------------------------------------------|
| ETV6     | ets variant 6                                                    | This gene encodes an ETS family transcription factor that it is required for hematopoiesis and maintenance of the developing vascular network.                                                                                                                                                                                               |
| FADD     | Fas (TNFRSF6)-associated via death domain                        | The protein encoded by this gene is an adaptor molecule that interacts with various cell surface receptors and mediates cell apoptotic signals.                                                                                                                                                                                              |
| FAS      | Fas (TNF receptor superfamily, member 6)                         | This protein has been shown to play a central role in the physiological regulation of programmed cell death, and has been implicated in the pathogenesis of various malignancies and diseases of the immune system. This receptor is found to be involved in transducing the proliferating signals in normal diploid fibroblast and T cells. |
| FOS      | v-fos FBJ murine osteosarcoma viral oncogene homolog             | The FOS proteins have been implicated as regulators of cell proliferation, differentiation, transformation, and apoptotic cell death.                                                                                                                                                                                                        |
| GRB2     | growth factor receptor-bound protein 2                           | The protein may be involved in the signal transduction pathway.                                                                                                                                                                                                                                                                              |
| HDAC5    | histone deacetylase 5                                            | This protein possesses histone deacetylase activity and represses transcription when tethered to a promoter.                                                                                                                                                                                                                                 |
| HDAC7    | histone deacetylase 7                                            | This gene is orthologous to mouse HDAC7 gene whose protein promotes repression mediated via the transcriptional corepressor SMRT.                                                                                                                                                                                                            |
| HRH1     | histamine receptor H1                                            | This protein mediates the contraction of smooth muscles, the increase in capillary permeability due to contraction of terminal venules, the release of catecholamine from adrenal medulla, and neurotransmission in the central nervous system.                                                                                              |
| HSP90AA1 | heat shock protein 90kDa alpha (cytosolic), class A member 1     | HSP90 proteins are molecular chaperones that have key roles in signal transduction, protein folding, protein degradation, and morphologic evolution.                                                                                                                                                                                         |
| HSP90B1  | heat shock protein 90kDa beta (Grp94), member 1                  | HSP90 proteins play roles in folding newly synthesized proteins or stabilizing and refolding denatured proteins after stress.                                                                                                                                                                                                                |
| HSPD1    | heat shock 60kDa protein 1 (chaperonin)                          | This protein may function as a signaling molecule in the innate immune system. It is essential for the folding and assembly of newly imported proteins in the mitochondria.                                                                                                                                                                  |
| ICAM1    | intercellular adhesion molecule 1                                | This gene encodes a cell surface glycoprotein which is typically expressed on endothelial cells and cells of the immune system.                                                                                                                                                                                                              |
| ICOSLG   | inducible T-cell co-stimulator ligand                            |                                                                                                                                                                                                                                                                                                                                              |
| IFI16    | interferon, gamma-inducible protein 16                           | This protein is involved in DNA binding, transcriptional regulation, and protein-protein interactions. It modulates p53 function, and inhibits cell growth in the Ras/Raf signaling pathway.                                                                                                                                                 |
| IGF2     | insulin-like growth factor 2 (somatomedin A)                     | This gene encodes a member of the insulin family of polypeptide growth factors that is involved in development and growth.                                                                                                                                                                                                                   |
| IGF2R    | insulin-like growth factor 2 receptor                            | This receptor functions in the intracellular trafficking of lysosomal enzymes, the activation of transforming growth factor beta, and the degradation of IGF2.                                                                                                                                                                               |
| IL8      | interleukin 8                                                    | This chemokine, one of the major mediators of the inflammatory response, functions as a chemoattractant, and is also a potent angiogenic factor.                                                                                                                                                                                             |
| IL2RG    | interleukin 2 receptor, gamma (severe combined immunodeficiency) | The interleukin 2 (IL2) receptor gamma chain (IL2RG), an important signalling component of many interleukin receptors (IL2,IL4,IL7,IL9, and IL15).                                                                                                                                                                                           |

|        |                                                                            |                                                                                                                                                                                                                                                                 |
|--------|----------------------------------------------------------------------------|-----------------------------------------------------------------------------------------------------------------------------------------------------------------------------------------------------------------------------------------------------------------|
| IL4R   | interleukin 4 receptor                                                     | This protein can bind interleukin 4 to promote differentiation of Th2 cells, can be produced by an alternate splice variant or by proteolysis of the membrane-bound protein, and can inhibit IL4-mediated cell proliferation and IL5 upregulation by T-cells.   |
| IL7R   | interleukin 7 receptor                                                     | This protein has been shown to play a critical role in the V(D)J recombination during lymphocyte development, and to control the accessibility of the TCR gamma locus by STAT5 and histone acetylation.                                                         |
| IRF1   | interferon regulatory factor 1                                             | IRF1 is a transcription activator of genes induced by interferons alpha, beta, and gamma. It also plays roles in regulating apoptosis and tumor-suppression.                                                                                                    |
| IRF2   | interferon regulatory factor 2                                             | IRF2 competitively inhibits the IRF1-mediated transcriptional activation of interferons alpha and beta, and presumably other genes that employ IRF1 for transcription activation. However, IRF2 also functions as a transcriptional activator of histone H4.    |
| ITGAM  | integrin, alpha M (complement component 3 receptor 3 subunit)              | The alpha M beta 2 integrin is important in the adherence of neutrophils and monocytes to stimulated endothelium, and also in the phagocytosis of complement coated particles.                                                                                  |
| ITGB2  | integrin, beta 2 (complement component 3 receptor 3 and 4 subunit)         | Integrins are known to participate in cell adhesion as well as cell-surface mediated signalling.                                                                                                                                                                |
| JMJD6  | jumonji domain containing 6                                                | JmjC domain-containing proteins are predicted to function as protein hydroxylases or histone demethylases.                                                                                                                                                      |
| JUN    | jun oncogene                                                               | This protein interacts directly with specific target DNA sequences to regulate gene expression.                                                                                                                                                                 |
| LAMP1  | lysosomal-associated membrane protein 1                                    | This glycoprotein provides selectins with carbohydrate ligands, and may play a role in tumor cell metastasis.                                                                                                                                                   |
| LCN2   | lipocalin 2                                                                |                                                                                                                                                                                                                                                                 |
| LYN    | v-src-1 Yamaguchi sarcoma viral related oncogene homolog                   |                                                                                                                                                                                                                                                                 |
| MAFB   | v-maf musculoaponeurotic fibrosarcoma oncogene homolog B (avian)           | This protein plays an important role in the regulation of lineage-specific hematopoiesis. It represses ETS1-mediated transcription of erythroid-specific genes in myeloid cells.                                                                                |
| MAPK14 | mitogen-activated protein kinase 14                                        | This kinase may be involved in stress related transcription and cell cycle regulation, as well as in genotoxic stress response.                                                                                                                                 |
| MAX    | MYC associated factor X                                                    | The homodimers and heterodimers this protein forms compete for a common DNA target site (the E box) and rearrangement among these dimer forms provides a complex system of transcriptional regulation.                                                          |
| MED1   | mediator complex subunit 1                                                 | The protein encoded by this gene is a subunit of the CRSP (cofactor required for SP1 activation) complex, which, along with TFIID, is required for efficient activation by SP1. It also regulates p53-dependent apoptosis and it is essential for adipogenesis. |
| MEIS1  | Meis homeobox 1                                                            | Homeobox genes, of which the most well-characterized category is represented by the HOX genes, play a crucial role in normal development. In addition, several homeoproteins are involved in neoplasia.                                                         |
| MLL    | myeloid/lymphoid or mixed-lineage leukemia (trithorax homolog, Drosophila) | The MLL gene encodes a DNA-binding protein that methylates histone H3 (see MIM 601128) lys4 (H3K4) and positively regulates expression of target genes, including multiple HOX genes (see MIM 142980).                                                          |

|        |                                                                                                 |                                                                                                                                                                                                                                                                           |
|--------|-------------------------------------------------------------------------------------------------|---------------------------------------------------------------------------------------------------------------------------------------------------------------------------------------------------------------------------------------------------------------------------|
| MLLT1  | myeloid/lymphoid or mixed-lineage leukemia (trithorax homolog, Drosophila); translocated to, 1  |                                                                                                                                                                                                                                                                           |
| MLLT10 | myeloid/lymphoid or mixed-lineage leukemia (trithorax homolog, Drosophila); translocated to, 10 |                                                                                                                                                                                                                                                                           |
| NCAPH2 | non-SMC condensin II complex, subunit H2                                                        | Condensin complexes I and II play essential roles in mitotic chromosome assembly and segregation.                                                                                                                                                                         |
| NCOA6  | nuclear receptor coactivator 6                                                                  | This protein is a transcriptional coactivator that can interact with nuclear hormone receptors to enhance their transcriptional activator functions. It is involved in the hormone-dependent coactivation of several receptors. It may also act as a general coactivator. |
| NFKB1  | nuclear factor of kappa light polypeptide gene enhancer in B-cells 1                            | NFKB is a transcription regulator that is activated by various intra- and extra-cellular stimuli such as cytokines, oxidant-free radicals, ultraviolet irradiation, and bacterial or viral products.                                                                      |
| NFKB2  | nuclear factor of kappa light polypeptide gene enhancer in B-cells 2 (p49/p100)                 | NFKB has been detected in numerous cell types that express cytokines, chemokines, growth factors, cell adhesion molecules, and some acute phase proteins in health and in various disease states. NFKB is activated by a wide variety of stimuli.                         |
| NFYA   | nuclear transcription factor Y, alpha                                                           | This protein is one subunit of a trimeric complex, forming a highly conserved transcription factor that binds to CCAAT motifs in the promoter regions in a variety of genes.                                                                                              |
| NP     | nucleoside phosphorylase                                                                        | This protein is an enzyme which reversibly catalyzes the phosphorolysis of purine nucleosides.                                                                                                                                                                            |
| PDPK1  | 3-phosphoinositide dependent protein kinase-1                                                   |                                                                                                                                                                                                                                                                           |
| PICALM | phosphatidylinositol binding clathrin assembly protein                                          |                                                                                                                                                                                                                                                                           |
| PIK3R1 | phosphoinositide-3-kinase, regulatory subunit 1 (alpha)                                         | Phosphatidylinositol 3-kinase plays an important role in the metabolic actions of insulin.                                                                                                                                                                                |
| PLSCR1 | phospholipid scramblase 1                                                                       |                                                                                                                                                                                                                                                                           |
| PML    | promyelocytic leukemia                                                                          | This phosphoprotein localizes to nuclear bodies where it functions as a transcription factor and tumor suppressor. Its expression is cell-cycle related and it regulates the p53 response to oncogenic signals.                                                           |
| PRKCC  | protein kinase C, theta                                                                         | This protein is one of the PKC family members important for T-cell activation, and may link the T cell receptor (TCR) signaling complex to the activation of the transcription factors.                                                                                   |
| PTPN6  | protein tyrosine phosphatase, non-receptor type 6                                               | This protein is expressed primarily in hematopoietic cells, and functions as an important regulator of multiple signaling pathways in hematopoietic cells. It dephosphorylates a wide spectrum of phospho-proteins involved in hematopoietic cell signaling.              |

|        |                                                                                   |                                                                                                                                                                                                                                                                                                                                                    |
|--------|-----------------------------------------------------------------------------------|----------------------------------------------------------------------------------------------------------------------------------------------------------------------------------------------------------------------------------------------------------------------------------------------------------------------------------------------------|
| PTPN11 | protein tyrosine phosphatase, non-receptor type 11                                | This PTP is widely expressed in most tissues and plays a regulatory role in various cell signaling events that are important for a diversity of cell functions, such as mitogenic activation, metabolic control, transcription regulation, and cell migration.                                                                                     |
| RBM15  | RNA binding motif protein 15                                                      | Members of the SPEN (Split-end) family of proteins, including RBM15, have repressor function in several signaling pathways and may bind to RNA through interaction with spliceosome components.                                                                                                                                                    |
| RHOH   | ras homolog gene family, member H                                                 | This protein is transcribed only in hemopoietic cells.                                                                                                                                                                                                                                                                                             |
| RIPK2  | receptor-interacting serine-threonine kinase 2                                    | This protein is a component of signaling complexes in both the innate and adaptive immune pathways, and is a potent activator of NF-kappaB and inducer of apoptosis in response to various stimuli.                                                                                                                                                |
| RUNX1  | runt-related transcription factor 1                                               | This protein is thought to be involved in the development of normal hematopoiesis.                                                                                                                                                                                                                                                                 |
| SART1  | squamous cell carcinoma antigen recognized by T cells                             | This gene encodes two proteins, the SART1(800) protein expressed in the nucleus of the majority of proliferating cells, and the SART1(259) protein expressed in the cytosol of epithelial cancers, both thought to be involved in the regulation of proliferation.                                                                                 |
| SFXN1  | sideroflexin 1                                                                    |                                                                                                                                                                                                                                                                                                                                                    |
| SHC1   | SHC (Src homology 2 domain containing) transforming protein 1                     |                                                                                                                                                                                                                                                                                                                                                    |
| SOX4   | SRY (sex determining region Y)-box 4                                              | This protein may function in the apoptosis pathway leading to cell death as well as to tumorigenesis and may mediate downstream effects of PTH and PTHrP in bone development.                                                                                                                                                                      |
| SP3    | Sp3 transcription factor                                                          | This protein contains a zinc finger DNA-binding domain and several transactivation domains, and has been reported to function as a bifunctional transcription factor that either stimulates or represses the transcription of numerous genes.                                                                                                      |
| SPRED2 | sprouty-related, EVH1 domain containing 2                                         | SPRED2 is a member of the Sprouty (see SPRY1; MIM 602465)/SPRED family of proteins that regulate growth factor-induced activation of the MAP kinase cascade (see MAPK1; MIM 176948).                                                                                                                                                               |
| SRF    | serum response factor (c-fos serum response element-binding transcription factor) | This protein stimulates both cell proliferation and differentiation. It participates in cell cycle regulation, apoptosis, cell growth, and cell differentiation.                                                                                                                                                                                   |
| STAT1  | signal transducer and activator of transcription 1, 91kDa                         | This protein mediates the expression of a variety of genes, which is thought to be important for cell viability in response to different cell stimuli and pathogens.                                                                                                                                                                               |
| STAT3  | signal transducer and activator of transcription 3 (acute-phase response factor)  | This protein mediates the expression of a variety of genes in response to cell stimuli, and thus plays a key role in many cellular processes such as cell growth and apoptosis.                                                                                                                                                                    |
| STAT6  | signal transducer and activator of transcription 6, interleukin-4 induced         | This protein plays a central role in exerting IL4 mediated biological responses. It is found to induce the expression of BCL2L1/BCL-X(L), which is responsible for the anti-apoptotic activity of IL4. It also plays a role in differentiation of T helper 2 (Th2) cells, expression of cell surface markers, and class switch of immunoglobulins. |
| STAT5B | signal transducer and activator of transcription 5B                               | This protein mediates the signal transduction triggered by various cell ligands, such as IL2, IL4, CSF1, and different growth hormones. It is involved in TCR signaling, apoptosis, adult mammary gland development, and sexual dimorphism of liver gene expression.                                                                               |

|        |                                                                                                        |                                                                                                                                                                                                                          |
|--------|--------------------------------------------------------------------------------------------------------|--------------------------------------------------------------------------------------------------------------------------------------------------------------------------------------------------------------------------|
| SYK    | spleen tyrosine kinase                                                                                 |                                                                                                                                                                                                                          |
| TGFBR2 | transforming growth factor, beta receptor II (70/80kDa)                                                | This receptor regulates the transcription of a subset of genes related to cell proliferation.                                                                                                                            |
| THOC5  | THO complex 5                                                                                          |                                                                                                                                                                                                                          |
| TP53   | tumor protein p53                                                                                      | This gene encodes tumor protein p53, which responds to diverse cellular stresses to regulate target genes that induce cell cycle arrest, apoptosis, senescence, DNA repair, or changes in metabolism.                    |
| TSC2   | tuberous sclerosis 2                                                                                   | This protein is a tumor suppressor and is able to stimulate specific GTPases.                                                                                                                                            |
| TWSG1  | twisted gastrulation homolog 1 (Drosophila)                                                            |                                                                                                                                                                                                                          |
| UBE2I  | ubiquitin-conjugating enzyme E2I (UBC9 homolog, yeast)                                                 | The modification of proteins with ubiquitin is an important cellular mechanism for targeting abnormal or short-lived proteins for degradation. This gene encodes a member of the E2 ubiquitin-conjugating enzyme family. |
| WASF2  | WAS protein family, member 2                                                                           | This multiprotein complex serves to transduce signals that involve changes in cell shape, motility or function.                                                                                                          |
| XRCC5  | X-ray repair complementing defective repair in Chinese hamster cells 5 (double-strand-break rejoining) | This gene functionally complements Chinese hamster xrs-6, a mutant defective in DNA double-strand break repair and in ability to undergo V(D)J recombination.                                                            |

Hematological System Development and Function, Hematopoiesis: Differentiation: Differentiation of Leukocytes (1.10E-04)

|       |                                                    |                                                                                                                                                                                                                                         |
|-------|----------------------------------------------------|-----------------------------------------------------------------------------------------------------------------------------------------------------------------------------------------------------------------------------------------|
| AKT1  | v-akt murine thymoma viral oncogene homolog 1      | In the developing nervous system AKT is a critical mediator of growth factor-induced neuronal survival. Survival factors can suppress apoptosis.                                                                                        |
| AKT2  | v-akt murine thymoma viral oncogene homolog 2      | This gene is a putative oncogene encoding a subfamily of serine/threonine kinases containing SH2-like (Src homology 2-like) domains. The encoded protein is a general protein kinase capable of phosphorylating several known proteins. |
| AP3B1 | adaptor-related protein complex 3, beta 1 subunit  | This gene encodes a protein that may play a role in organelle biogenesis associated with melanosomes, platelet dense granules, and lysosomes.                                                                                           |
| AP3D1 | adaptor-related protein complex 3, delta 1 subunit | The AP3D1 subunit is implicated in intracellular biogenesis and trafficking of pigment granules and platelet dense granules and neurotransmitter vesicles.                                                                              |
| APAF1 | apoptotic peptidase activating factor 1            | This gene encodes a cytoplasmic protein that initiates apoptosis.                                                                                                                                                                       |
| BSG   | basigin (Ok blood group)                           | This protein is a plasma membrane protein that is important in spermatogenesis, embryo implantation, neural network formation, and tumor progression.                                                                                   |
| CCL3  | chemokine (C-C motif) ligand 3                     | Macrophage inflammatory protein-1 is a so-called monokine that is involved in the acute inflammatory state in the recruitment and activation of polymorphonuclear leukocytes.                                                           |

|          |                                                                     |                                                                                                                                                                                                                                                                                                                                              |
|----------|---------------------------------------------------------------------|----------------------------------------------------------------------------------------------------------------------------------------------------------------------------------------------------------------------------------------------------------------------------------------------------------------------------------------------|
| CD300A   | CD300a molecule                                                     | The CMRF35 antigen (CMRF35A; MIM 606786), which was identified by reactivity with a monoclonal antibody, is present on monocytes, neutrophils, and some T and B lymphocytes.                                                                                                                                                                 |
| CDC42    | cell division cycle 42 (GTP binding protein, 25kDa)                 | This protein regulates signaling pathways that control diverse cellular functions including cell morphology, migration, endocytosis and cell cycle progression.                                                                                                                                                                              |
| CDKN2A   | cyclin-dependent kinase inhibitor 2A (melanoma, p16, inhibits CDK4) | This ARF product functions as a stabilizer of the tumor suppressor protein p53 as it can interact with, and sequester, MDM1, a protein responsible for the degradation of p53. It has a common functionality in cell cycle G1 control.                                                                                                       |
| CEBPD    | CCAAT/enhancer binding protein (C/EBP), delta                       | This protein is important in the regulation of genes involved in immune and inflammatory responses, and may be involved in the regulation of genes associated with activation and/or differentiation of macrophages.                                                                                                                         |
| CTBP1    | C-terminal binding protein 1                                        | This proteins can interact with a polycomb group protein complex which participates in regulation of gene expression during development.                                                                                                                                                                                                     |
| DCLRE1C  | DNA cross-link repair 1C (PSO2 homolog, S. cerevisiae)              | This nuclear protein is involved in V(D)J recombination and DNA repair.                                                                                                                                                                                                                                                                      |
| DICER1   | dicer 1, ribonuclease type III                                      | This ribonuclease is required by the RNA interference and small temporal RNA pathways to produce the active small RNA component that represses gene expression.                                                                                                                                                                              |
| EGR1     | early growth response 1                                             | This protein is a transcriptional regulator required for differentiation and mitogenesis.                                                                                                                                                                                                                                                    |
| FAS      | Fas (TNF receptor superfamily, member 6)                            | This protein has been shown to play a central role in the physiological regulation of programmed cell death, and has been implicated in the pathogenesis of various malignancies and diseases of the immune system. This receptor is found to be involved in transducing the proliferating signals in normal diploid fibroblast and T cells. |
| FOS      | v-fos FBJ murine osteosarcoma viral oncogene homolog                | The FOS proteins have been implicated as regulators of cell proliferation, differentiation, transformation, and apoptotic cell death.                                                                                                                                                                                                        |
| GRB2     | growth factor receptor-bound protein 2                              | The protein may be involved in the signal transduction pathway.                                                                                                                                                                                                                                                                              |
| HDAC5    | histone deacetylase 5                                               | This protein possesses histone deacetylase activity and represses transcription when tethered to a promoter.                                                                                                                                                                                                                                 |
| HDAC7    | histone deacetylase 7                                               | This gene is orthologous to mouse HDAC7 gene whose protein promotes repression mediated via the transcriptional corepressor SMRT.                                                                                                                                                                                                            |
| HRH1     | histamine receptor H1                                               | This protein mediates the contraction of smooth muscles, the increase in capillary permeability due to contraction of terminal venules, the release of catecholamine from adrenal medulla, and neurotransmission in the central nervous system.                                                                                              |
| HSP90AA1 | heat shock protein 90kDa alpha (cytosolic), class A member 1        | HSP90 proteins are molecular chaperones that have key roles in signal transduction, protein folding, protein degradation, and morphologic evolution.                                                                                                                                                                                         |
| HSP90B1  | heat shock protein 90kDa beta (Grp94), member 1                     | HSP90 proteins play roles in folding newly synthesized proteins or stabilizing and refolding denatured proteins after stress.                                                                                                                                                                                                                |
| HSPD1    | heat shock 60kDa protein 1 (chaperonin)                             | This protein may function as a signaling molecule in the innate immune system. It is essential for the folding and assembly of newly imported proteins in the mitochondria.                                                                                                                                                                  |
| ICAM1    | intercellular adhesion molecule 1                                   | This gene encodes a cell surface glycoprotein which is typically expressed on endothelial cells and cells of the immune system.                                                                                                                                                                                                              |
| ICOSLG   | inducible T-cell co-stimulator ligand                               |                                                                                                                                                                                                                                                                                                                                              |

|        |                                                                            |                                                                                                                                                                                                                                                               |
|--------|----------------------------------------------------------------------------|---------------------------------------------------------------------------------------------------------------------------------------------------------------------------------------------------------------------------------------------------------------|
| IFI16  | interferon, gamma-inducible protein 16                                     | This protein is involved in DNA binding, transcriptional regulation, and protein-protein interactions. It modulates p53 function, and inhibits cell growth in the Ras/Raf signaling pathway.                                                                  |
| IGF2   | insulin-like growth factor 2 (somatomedin A)                               | This gene encodes a member of the insulin family of polypeptide growth factors that is involved in development and growth.                                                                                                                                    |
| IGF2R  | insulin-like growth factor 2 receptor                                      | This receptor functions in the intracellular trafficking of lysosomal enzymes, the activation of transforming growth factor beta, and the degradation of IGF2.                                                                                                |
| IL8    | interleukin 8                                                              | This chemokine, one of the major mediators of the inflammatory response, functions as a chemoattractant, and is also a potent angiogenic factor.                                                                                                              |
| IL2RG  | interleukin 2 receptor, gamma (severe combined immunodeficiency)           | The interleukin 2 (IL2) receptor gamma chain (IL2RG), an important signalling component of many interleukin receptors (IL2,IL4,IL7,IL9, and IL15).                                                                                                            |
| IL4R   | interleukin 4 receptor                                                     | This protein can bind interleukin 4 to promote differentiation of Th2 cells, can be produced by an alternate splice variant or by proteolysis of the membrane-bound protein, and can inhibit IL4-mediated cell proliferation and IL5 upregulation by T-cells. |
| IL7R   | interleukin 7 receptor                                                     | This protein has been shown to play a critical role in the V(D)J recombination during lymphocyte development, and to control the accessibility of the TCR gamma locus by STAT5 and histone acetylation.                                                       |
| IRF1   | interferon regulatory factor 1                                             | IRF1 is a transcription activator of genes induced by interferons alpha, beta, and gamma. It also plays roles in regulating apoptosis and tumor-suppression.                                                                                                  |
| IRF2   | interferon regulatory factor 2                                             | IRF2 competitively inhibits the IRF1-mediated transcriptional activation of interferons alpha and beta, and presumably other genes that employ IRF1 for transcription activation. However, IRF2 also functions as a transcriptional activator of histone H4.  |
| ITGAM  | integrin, alpha M (complement component 3 receptor 3 subunit)              | The alpha M beta 2 integrin is important in the adherence of neutrophils and monocytes to stimulated endothelium, and also in the phagocytosis of complement coated particles.                                                                                |
| ITGB2  | integrin, beta 2 (complement component 3 receptor 3 and 4 subunit)         | Integrins are known to participate in cell adhesion as well as cell-surface mediated signalling.                                                                                                                                                              |
| JMJD6  | jumonji domain containing 6                                                | JmjC domain-containing proteins are predicted to function as protein hydroxylases or histone demethylases.                                                                                                                                                    |
| JUN    | jun oncogene                                                               | This protein interacts directly with specific target DNA sequences to regulate gene expression.                                                                                                                                                               |
| LAMP1  | lysosomal-associated membrane protein 1                                    | This glycoprotein provides selectins with carbohydrate ligands, and may play a role in tumor cell metastasis.                                                                                                                                                 |
| LYN    | v-src-1 Yamaguchi sarcoma viral related oncogene homolog                   |                                                                                                                                                                                                                                                               |
| MAPK14 | mitogen-activated protein kinase 14                                        | This kinase may be involved in stress related transcription and cell cycle regulation, as well as in genotoxic stress response.                                                                                                                               |
| MEIS1  | Meis homeobox 1                                                            | Homeobox genes, of which the most well-characterized category is represented by the HOX genes, play a crucial role in normal development. In addition, several homeoproteins are involved in neoplasia.                                                       |
| MLL    | myeloid/lymphoid or mixed-lineage leukemia (trithorax homolog, Drosophila) | The MLL gene encodes a DNA-binding protein that methylates histone H3 (see MIM 601128) lys4 (H3K4) and positively regulates expression of target genes, including multiple HOX genes (see MIM 142980).                                                        |

|        |                                                                                                 |                                                                                                                                                                                                                                                                           |
|--------|-------------------------------------------------------------------------------------------------|---------------------------------------------------------------------------------------------------------------------------------------------------------------------------------------------------------------------------------------------------------------------------|
| MLLT1  | myeloid/lymphoid or mixed-lineage leukemia (trithorax homolog, Drosophila); translocated to, 1  |                                                                                                                                                                                                                                                                           |
| MLLT10 | myeloid/lymphoid or mixed-lineage leukemia (trithorax homolog, Drosophila); translocated to, 10 |                                                                                                                                                                                                                                                                           |
| NCAPH2 | non-SMC condensin II complex, subunit H2                                                        | Condensin complexes I and II play essential roles in mitotic chromosome assembly and segregation.                                                                                                                                                                         |
| NCOA6  | nuclear receptor coactivator 6                                                                  | This protein is a transcriptional coactivator that can interact with nuclear hormone receptors to enhance their transcriptional activator functions. It is involved in the hormone-dependent coactivation of several receptors. It may also act as a general coactivator. |
| NFKB1  | nuclear factor of kappa light polypeptide gene enhancer in B-cells 1                            | NFKB is a transcription regulator that is activated by various intra- and extra-cellular stimuli such as cytokines, oxidant-free radicals, ultraviolet irradiation, and bacterial or viral products.                                                                      |
| NFKB2  | nuclear factor of kappa light polypeptide gene enhancer in B-cells 2 (p49/p100)                 | NFKB has been detected in numerous cell types that express cytokines, chemokines, growth factors, cell adhesion molecules, and some acute phase proteins in health and in various disease states. NFKB is activated by a wide variety of stimuli.                         |
| NFYA   | nuclear transcription factor Y, alpha                                                           | This protein is one subunit of a trimeric complex, forming a highly conserved transcription factor that binds to CCAAT motifs in the promoter regions in a variety of genes.                                                                                              |
| NP     | nucleoside phosphorylase                                                                        | This protein is an enzyme which reversibly catalyzes the phosphorolysis of purine nucleosides.                                                                                                                                                                            |
| PDPK1  | 3-phosphoinositide dependent protein kinase-1                                                   |                                                                                                                                                                                                                                                                           |
| PICALM | phosphatidylinositol binding clathrin assembly protein                                          |                                                                                                                                                                                                                                                                           |
| PIK3R1 | phosphoinositide-3-kinase, regulatory subunit 1 (alpha)                                         | Phosphatidylinositol 3-kinase plays an important role in the metabolic actions of insulin.                                                                                                                                                                                |
| PLSCR1 | phospholipid scramblase 1                                                                       |                                                                                                                                                                                                                                                                           |
| PML    | promyelocytic leukemia                                                                          | This phosphoprotein localizes to nuclear bodies where it functions as a transcription factor and tumor suppressor. Its expression is cell-cycle related and it regulates the p53 response to oncogenic signals.                                                           |
| PRKCK  | protein kinase C, theta                                                                         | This protein is one of the PKC family members important for T-cell activation, and may link the T cell receptor (TCR) signaling complex to the activation of the transcription factors.                                                                                   |
| PTPN6  | protein tyrosine phosphatase, non-receptor type 6                                               | This protein is expressed primarily in hematopoietic cells, and functions as an important regulator of multiple signaling pathways in hematopoietic cells. It dephosphorylates a wide spectrum of phospho-proteins involved in hematopoietic cell signaling.              |

|        |                                                                                   |                                                                                                                                                                                                                                                                                                                                                    |
|--------|-----------------------------------------------------------------------------------|----------------------------------------------------------------------------------------------------------------------------------------------------------------------------------------------------------------------------------------------------------------------------------------------------------------------------------------------------|
| RBM15  | RNA binding motif protein 15                                                      | Members of the SPEN (Split-end) family of proteins, including RBM15, have repressor function in several signaling pathways and may bind to RNA through interaction with spliceosome components.                                                                                                                                                    |
| RHOH   | ras homolog gene family, member H                                                 | This protein is transcribed only in hemopoietic cells.                                                                                                                                                                                                                                                                                             |
| RIPK2  | receptor-interacting serine-threonine kinase 2                                    | This protein is a component of signaling complexes in both the innate and adaptive immune pathways, and is a potent activator of NF-kappaB and inducer of apoptosis in response to various stimuli.                                                                                                                                                |
| RUNX1  | runt-related transcription factor 1                                               | This protein is thought to be involved in the development of normal hematopoiesis.                                                                                                                                                                                                                                                                 |
| SART1  | squamous cell carcinoma antigen recognized by T cells                             | This gene encodes two proteins, the SART1(800) protein expressed in the nucleus of the majority of proliferating cells, and the SART1(259) protein expressed in the cytosol of epithelial cancers, both thought to be involved in the regulation of proliferation.                                                                                 |
| SHC1   | SHC (Src homology 2 domain containing) transforming protein 1                     |                                                                                                                                                                                                                                                                                                                                                    |
| SOX4   | SRY (sex determining region Y)-box 4                                              | This protein may function in the apoptosis pathway leading to cell death as well as to tumorigenesis and may mediate downstream effects of PTH and PTHrP in bone development.                                                                                                                                                                      |
| SP3    | Sp3 transcription factor                                                          | This protein contains a zinc finger DNA-binding domain and several transactivation domains, and has been reported to function as a bifunctional transcription factor that either stimulates or represses the transcription of numerous genes.                                                                                                      |
| SRF    | serum response factor (c-fos serum response element-binding transcription factor) | This protein stimulates both cell proliferation and differentiation. It participates in cell cycle regulation, apoptosis, cell growth, and cell differentiation.                                                                                                                                                                                   |
| STAT1  | signal transducer and activator of transcription 1, 91kDa                         | This protein mediates the expression of a variety of genes, which is thought to be important for cell viability in response to different cell stimuli and pathogens.                                                                                                                                                                               |
| STAT3  | signal transducer and activator of transcription 3 (acute-phase response factor)  | This protein mediates the expression of a variety of genes in response to cell stimuli, and thus plays a key role in many cellular processes such as cell growth and apoptosis.                                                                                                                                                                    |
| STAT6  | signal transducer and activator of transcription 6, interleukin-4 induced         | This protein plays a central role in exerting IL4 mediated biological responses. It is found to induce the expression of BCL2L1/BCL-X(L), which is responsible for the anti-apoptotic activity of IL4. It also plays a role in differentiation of T helper 2 (Th2) cells, expression of cell surface markers, and class switch of immunoglobulins. |
| STAT5B | signal transducer and activator of transcription 5B                               | This protein mediates the signal transduction triggered by various cell ligands, such as IL2, IL4, CSF1, and different growth hormones. It is involved in TCR signaling, apoptosis, adult mammary gland development, and sexual dimorphism of liver gene expression.                                                                               |
| SYK    | spleen tyrosine kinase                                                            |                                                                                                                                                                                                                                                                                                                                                    |
| TGFBR2 | transforming growth factor, beta receptor II (70/80kDa)                           | This receptor regulates the transcription of a subset of genes related to cell proliferation.                                                                                                                                                                                                                                                      |
| THOC5  | THO complex 5                                                                     |                                                                                                                                                                                                                                                                                                                                                    |

|       |                                                                                                        |                                                                                                                                                                                                       |
|-------|--------------------------------------------------------------------------------------------------------|-------------------------------------------------------------------------------------------------------------------------------------------------------------------------------------------------------|
| TP53  | tumor protein p53                                                                                      | This gene encodes tumor protein p53, which responds to diverse cellular stresses to regulate target genes that induce cell cycle arrest, apoptosis, senescence, DNA repair, or changes in metabolism. |
| TSC2  | tuberous sclerosis 2                                                                                   | This protein is a tumor suppressor and is able to stimulate specific GTPases.                                                                                                                         |
| TWSG1 | twisted gastrulation homolog 1 (Drosophila)                                                            |                                                                                                                                                                                                       |
| XRCC5 | X-ray repair complementing defective repair in Chinese hamster cells 5 (double-strand-break rejoining) | This gene functionally complements Chinese hamster xrs-6, a mutant defective in DNA double-strand break repair and in ability to undergo V(D)J recombination.                                         |

Hematological System Development and Function, Hematopoiesis: Differentiation of Lymphocytes (7.32E-04), Differentiation of T Lymphocytes (1.24E-04)

|         |                                                                     |                                                                                                                                                                                                                                        |
|---------|---------------------------------------------------------------------|----------------------------------------------------------------------------------------------------------------------------------------------------------------------------------------------------------------------------------------|
| AKT1    | v-akt murine thymoma viral oncogene homolog 1                       | In the developing nervous system AKT is a critical mediator of growth factor-induced neuronal survival. Survival factors can suppress apoptosis.                                                                                       |
| AP3B1   | adaptor-related protein complex 3, beta 1 subunit                   | This gene encodes a protein that may play a role in organelle biogenesis associated with melanosomes, platelet dense granules, and lysosomes.                                                                                          |
| AP3D1   | adaptor-related protein complex 3, delta 1 subunit                  | The AP3D1 subunit is implicated in intracellular biogenesis and trafficking of pigment granules and platelet dense granules and neurotransmitter vesicles.                                                                             |
| APAF1   | apoptotic peptidase activating factor 1                             | This gene encodes a cytoplasmic protein that initiates apoptosis.                                                                                                                                                                      |
| BSG     | basigin (Ok blood group)                                            | This protein is a plasma membrane protein that is important in spermatogenesis, embryo implantation, neural network formation, and tumor progression.                                                                                  |
| CCL3    | chemokine (C-C motif) ligand 3                                      | Macrophage inflammatory protein-1 is a so-called monokine that is involved in the acute inflammatory state in the recruitment and activation of polymorphonuclear leukocytes.                                                          |
| CDKN2A  | cyclin-dependent kinase inhibitor 2A (melanoma, p16, inhibits CDK4) | This ARF product functions as a stabilizer of the tumor suppressor protein p53 as it can interact with, and sequester, MDM1, a protein responsible for the degradation of p53. It has a common functionality in cell cycle G1 control. |
| DCLRE1C | DNA cross-link repair 1C (PSO2 homolog, S. cerevisiae)              | This nuclear protein is involved in V(D)J recombination and DNA repair.                                                                                                                                                                |
| DICER1  | dicer 1, ribonuclease type III                                      | This ribonuclease is required by the RNA interference and small temporal RNA pathways to produce the active small RNA component that represses gene expression.                                                                        |
| EGR1    | early growth response 1                                             | This protein is a transcriptional regulator required for differentiation and mitogenesis.                                                                                                                                              |

|          |                                                                    |                                                                                                                                                                                                                                                                                                                                              |
|----------|--------------------------------------------------------------------|----------------------------------------------------------------------------------------------------------------------------------------------------------------------------------------------------------------------------------------------------------------------------------------------------------------------------------------------|
| FAS      | Fas (TNF receptor superfamily, member 6)                           | This protein has been shown to play a central role in the physiological regulation of programmed cell death, and has been implicated in the pathogenesis of various malignancies and diseases of the immune system. This receptor is found to be involved in transducing the proliferating signals in normal diploid fibroblast and T cells. |
| FOS      | v-fos FBJ murine osteosarcoma viral oncogene homolog               | The FOS proteins have been implicated as regulators of cell proliferation, differentiation, transformation, and apoptotic cell death.                                                                                                                                                                                                        |
| GRB2     | growth factor receptor-bound protein 2                             | The protein may be involved in the signal transduction pathway.                                                                                                                                                                                                                                                                              |
| HDAC5    | histone deacetylase 5                                              | This protein possesses histone deacetylase activity and represses transcription when tethered to a promoter.                                                                                                                                                                                                                                 |
| HDAC7    | histone deacetylase 7                                              | This gene is orthologous to mouse HDAC7 gene whose protein promotes repression mediated via the transcriptional corepressor SMRT.                                                                                                                                                                                                            |
| HSP90AA1 | heat shock protein 90kDa alpha (cytosolic), class A member 1       | HSP90 proteins are molecular chaperones that have key roles in signal transduction, protein folding, protein degradation, and morphologic evolution.                                                                                                                                                                                         |
| HSP90B1  | heat shock protein 90kDa beta (Grp94), member 1                    | HSP90 proteins play roles in folding newly synthesized proteins or stabilizing and refolding denatured proteins after stress.                                                                                                                                                                                                                |
| HSPD1    | heat shock 60kDa protein 1 (chaperonin)                            | This protein may function as a signaling molecule in the innate immune system. It is essential for the folding and assembly of newly imported proteins in the mitochondria.                                                                                                                                                                  |
| ICAM1    | intercellular adhesion molecule 1                                  | This gene encodes a cell surface glycoprotein which is typically expressed on endothelial cells and cells of the immune system.                                                                                                                                                                                                              |
| ICOSLG   | inducible T-cell co-stimulator ligand                              |                                                                                                                                                                                                                                                                                                                                              |
| IGF2     | insulin-like growth factor 2 (somatomedin A)                       | This gene encodes a member of the insulin family of polypeptide growth factors that is involved in development and growth.                                                                                                                                                                                                                   |
| IGF2R    | insulin-like growth factor 2 receptor                              | This receptor functions in the intracellular trafficking of lysosomal enzymes, the activation of transforming growth factor beta, and the degradation of IGF2.                                                                                                                                                                               |
| IL2RG    | interleukin 2 receptor, gamma (severe combined immunodeficiency)   | The interleukin 2 (IL2) receptor gamma chain (IL2RG), an important signalling component of many interleukin receptors (IL2,IL4,IL7,IL9, and IL15).                                                                                                                                                                                           |
| IL4R     | interleukin 4 receptor                                             | This protein can bind interleukin 4 to promote differentiation of Th2 cells, can be produced by an alternate splice variant or by proteolysis of the membrane-bound protein, and can inhibit IL4-mediated cell proliferation and IL5 upregulation by T-cells.                                                                                |
| IL7R     | interleukin 7 receptor                                             | This protein has been shown to play a critical role in the V(D)J recombination during lymphocyte development, and to control the accessibility of the TCR gamma locus by STAT5 and histone acetylation.                                                                                                                                      |
| IRF1     | interferon regulatory factor 1                                     | IRF1 is a transcription activator of genes induced by interferons alpha, beta, and gamma. It also plays roles in regulating apoptosis and tumor-suppression.                                                                                                                                                                                 |
| IRF2     | interferon regulatory factor 2                                     | IRF2 competitively inhibits the IRF1-mediated transcriptional activation of interferons alpha and beta, and presumably other genes that employ IRF1 for transcription activation. However, IRF2 also functions as a transcriptional activator of histone H4.                                                                                 |
| ITGB2    | integrin, beta 2 (complement component 3 receptor 3 and 4 subunit) | Integrins are known to participate in cell adhesion as well as cell-surface mediated signalling.                                                                                                                                                                                                                                             |

|        |                                                                                                 |                                                                                                                                                                                                                                                                    |
|--------|-------------------------------------------------------------------------------------------------|--------------------------------------------------------------------------------------------------------------------------------------------------------------------------------------------------------------------------------------------------------------------|
| JMJD6  | jumonji domain containing 6                                                                     | JmjC domain-containing proteins are predicted to function as protein hydroxylases or histone demethylases.                                                                                                                                                         |
| LAMP1  | lysosomal-associated membrane protein 1                                                         | This glycoprotein provides selectins with carbohydrate ligands, and may play a role in tumor cell metastasis.                                                                                                                                                      |
| MAPK14 | mitogen-activated protein kinase 14                                                             | This kinase may be involved in stress related transcription and cell cycle regulation, as well as in genotoxic stress response.                                                                                                                                    |
| MLLT10 | myeloid/lymphoid or mixed-lineage leukemia (trithorax homolog, Drosophila); translocated to, 10 |                                                                                                                                                                                                                                                                    |
| NCAPH2 | non-SMC condensin II complex, subunit H2                                                        | Condensin complexes I and II play essential roles in mitotic chromosome assembly and segregation.                                                                                                                                                                  |
| NFKB1  | nuclear factor of kappa light polypeptide gene enhancer in B-cells 1                            | NFKB is a transcription regulator that is activated by various intra- and extra-cellular stimuli such as cytokines, oxidant-free radicals, ultraviolet irradiation, and bacterial or viral products.                                                               |
| NP     | nucleoside phosphorylase                                                                        | This protein is an enzyme which reversibly catalyzes the phosphorolysis of purine nucleosides.                                                                                                                                                                     |
| PDPK1  | 3-phosphoinositide dependent protein kinase-1                                                   |                                                                                                                                                                                                                                                                    |
| PICALM | phosphatidylinositol binding clathrin assembly protein                                          |                                                                                                                                                                                                                                                                    |
| PIK3R1 | phosphoinositide-3-kinase, regulatory subunit 1 (alpha)                                         | Phosphatidylinositol 3-kinase plays an important role in the metabolic actions of insulin.                                                                                                                                                                         |
| PRKCQ  | protein kinase C, theta                                                                         | This protein is one of the PKC family members important for T-cell activation, and may link the T cell receptor (TCR) signaling complex to the activation of the transcription factors.                                                                            |
| PTPN6  | protein tyrosine phosphatase, non-receptor type 6                                               | This protein is expressed primarily in hematopoietic cells, and functions as an important regulator of multiple signaling pathways in hematopoietic cells. It dephosphorylates a wide spectrum of phospho-proteins involved in hematopoietic cell signaling.       |
| RBM15  | RNA binding motif protein 15                                                                    | Members of the SPEN (Split-end) family of proteins, including RBM15, have repressor function in several signaling pathways and may bind to RNA through interaction with spliceosome components.                                                                    |
| RHOH   | ras homolog gene family, member H                                                               | This protein is transcribed only in hemopoietic cells.                                                                                                                                                                                                             |
| RIPK2  | receptor-interacting serine-threonine kinase 2                                                  | This protein is a component of signaling complexes in both the innate and adaptive immune pathways, and is a potent activator of NF-kappaB and inducer of apoptosis in response to various stimuli.                                                                |
| RUNX1  | runt-related transcription factor 1                                                             | This protein is thought to be involved in the development of normal hematopoiesis.                                                                                                                                                                                 |
| SART1  | squamous cell carcinoma antigen recognized by T cells                                           | This gene encodes two proteins, the SART1(800) protein expressed in the nucleus of the majority of proliferating cells, and the SART1(259) protein expressed in the cytosol of epithelial cancers, both thought to be involved in the regulation of proliferation. |

|        |                                                                                                        |                                                                                                                                                                                                                                                                                                                                                    |
|--------|--------------------------------------------------------------------------------------------------------|----------------------------------------------------------------------------------------------------------------------------------------------------------------------------------------------------------------------------------------------------------------------------------------------------------------------------------------------------|
| SOX4   | SRY (sex determining region Y)-box 4                                                                   | This protein may function in the apoptosis pathway leading to cell death as well as to tumorigenesis and may mediate downstream effects of PTH and PTHrP in bone development.                                                                                                                                                                      |
| SP3    | Sp3 transcription factor                                                                               | This protein contains a zinc finger DNA-binding domain and several transactivation domains, and has been reported to function as a bifunctional transcription factor that either stimulates or represses the transcription of numerous genes.                                                                                                      |
| STAT1  | signal transducer and activator of transcription 1, 91kDa                                              | This protein mediates the expression of a variety of genes, which is thought to be important for cell viability in response to different cell stimuli and pathogens.                                                                                                                                                                               |
| STAT6  | signal transducer and activator of transcription 6, interleukin-4 induced                              | This protein plays a central role in exerting IL4 mediated biological responses. It is found to induce the expression of BCL2L1/BCL-X(L), which is responsible for the anti-apoptotic activity of IL4. It also plays a role in differentiation of T helper 2 (Th2) cells, expression of cell surface markers, and class switch of immunoglobulins. |
| STAT5B | signal transducer and activator of transcription 5B                                                    | This protein mediates the signal transduction triggered by various cell ligands, such as IL2, IL4, CSF1, and different growth hormones. It is involved in TCR signaling, apoptosis, adult mammary gland development, and sexual dimorphism of liver gene expression.                                                                               |
| SYK    | spleen tyrosine kinase                                                                                 |                                                                                                                                                                                                                                                                                                                                                    |
| TGFBR2 | transforming growth factor, beta receptor II (70/80kDa)                                                | This receptor regulates the transcription of a subset of genes related to cell proliferation.                                                                                                                                                                                                                                                      |
| TP53   | tumor protein p53                                                                                      | This gene encodes tumor protein p53, which responds to diverse cellular stresses to regulate target genes that induce cell cycle arrest, apoptosis, senescence, DNA repair, or changes in metabolism.                                                                                                                                              |
| TWSG1  | twisted gastrulation homolog 1 (Drosophila)                                                            |                                                                                                                                                                                                                                                                                                                                                    |
| XRCC5  | X-ray repair complementing defective repair in Chinese hamster cells 5 (double-strand-break rejoining) | This gene functionally complements Chinese hamster xrs-6, a mutant defective in DNA double-strand break repair and in ability to undergo V(D)J recombination.                                                                                                                                                                                      |

Hematological System Development and Function: Development: Development of Blood Cells (2.01E-04)

|        |                                               |                                                                                                                                                                                                                                         |
|--------|-----------------------------------------------|-----------------------------------------------------------------------------------------------------------------------------------------------------------------------------------------------------------------------------------------|
| ADAM17 | ADAM metalloproteinase domain 17              | This protein functions as a tumor necrosis factor-alpha converting enzyme; binds mitotic arrest deficient 2 protein, and also plays a prominent role in the activation of the Notch signaling pathway.                                  |
| ADAR   | adenosine deaminase, RNA-specific             | This gene encodes the enzyme responsible for RNA editing by site-specific deamination of adenosines.                                                                                                                                    |
| AKT1   | v-akt murine thymoma viral oncogene homolog 1 | In the developing nervous system AKT is a critical mediator of growth factor-induced neuronal survival. Survival factors can suppress apoptosis.                                                                                        |
| AKT2   | v-akt murine thymoma viral oncogene homolog 2 | This gene is a putative oncogene encoding a subfamily of serine/threonine kinases containing SH2-like (Src homology 2-like) domains. The encoded protein is a general protein kinase capable of phosphorylating several known proteins. |

|        |                                                                                                    |                                                                                                                                                                                                                                         |
|--------|----------------------------------------------------------------------------------------------------|-----------------------------------------------------------------------------------------------------------------------------------------------------------------------------------------------------------------------------------------|
| B2M    | beta-2-microglobulin                                                                               | Beta-2-microglobulin is a serum protein found in association with the major histocompatibility complex (MHC) class I heavy chain on the surface of nearly all nucleated cells.                                                          |
| BAX    | BCL2-associated X protein                                                                          | This protein forms a heterodimer with BCL2, and functions as an apoptotic activator.                                                                                                                                                    |
| CCND1  | cyclin D1                                                                                          | This cyclin is required for cell cycle G1/S transition. It interacts with tumor suppressor protein Rb and the expression of this gene is regulated positively by Rb.                                                                    |
| CD69   | CD69 molecule                                                                                      | Expression of this protein is induced upon activation of T lymphocytes, and may play a role in proliferation. It may act to transmit signals in natural killer cells and platelets.                                                     |
| CD81   | CD81 molecule                                                                                      | This protein appears to promote muscle cell fusion and support myotube maintenance, and may be involved in signal transduction.                                                                                                         |
| CD83   | CD83 molecule                                                                                      |                                                                                                                                                                                                                                         |
| CDC2L5 | cell division cycle 2-like 5 (cholinesterase-related cell division controller)                     | The proteins of this family are well known for their essential roles as master switches in cell cycle control. They may also be involved in neurocytoskeleton dynamics. The exact function of this protein has not yet been determined. |
| CHD4   | chromodomain helicase DNA binding protein 4                                                        | This protein is the main component of the nucleosome remodeling and deacetylase complex and plays an important role in epigenetic transcriptional repression.                                                                           |
| CREB1  | cAMP responsive element binding protein 1                                                          | This protein induces transcription of genes in response to hormonal stimulation of the cAMP pathway.                                                                                                                                    |
| CXCR4  | chemokine (C-X-C motif) receptor 4                                                                 | This protein acts with the CD4 protein to support HIV entry into cells and is also highly expressed in breast cancer cells.                                                                                                             |
| DICER1 | dicer 1, ribonuclease type III                                                                     | This ribonuclease is required by the RNA interference and small temporal RNA pathways to produce the active small RNA component that represses gene expression.                                                                         |
| EGFR   | epidermal growth factor receptor (erythroblastic leukemia viral (v-erb-b) oncogene homolog, avian) | Binding of this receptor to a ligand induces dimerization and tyrosine autophosphorylation and leads to cell proliferation.                                                                                                             |
| EGR1   | early growth response 1                                                                            | This protein is a transcriptional regulator required for differentiation and mitogenesis.                                                                                                                                               |
| FADD   | Fas (TNFRSF6)-associated via death domain                                                          | The protein encoded by this gene is an adaptor molecule that interacts with various cell surface receptors and mediates cell apoptotic signals.                                                                                         |
| FCGR2A | Fc fragment of IgG, low affinity IIa, receptor (CD32)                                              | This protein is a cell surface receptor found on phagocytic cells such as macrophages and neutrophils, and is involved in the process of phagocytosis and clearing of immune complexes.                                                 |
| FOS    | v-fos FBJ murine osteosarcoma viral oncogene homolog                                               | The FOS proteins have been implicated as regulators of cell proliferation, differentiation, transformation, and apoptotic cell death.                                                                                                   |
| FUS    | fusion (involved in t(12;16) in malignant liposarcoma)                                             |                                                                                                                                                                                                                                         |
| ICAM1  | intercellular adhesion molecule 1                                                                  | This gene encodes a cell surface glycoprotein which is typically expressed on endothelial cells and cells of the immune system.                                                                                                         |

|        |                                                                      |                                                                                                                                                                                                                                                                                                                              |
|--------|----------------------------------------------------------------------|------------------------------------------------------------------------------------------------------------------------------------------------------------------------------------------------------------------------------------------------------------------------------------------------------------------------------|
| ICOSLG | inducible T-cell co-stimulator ligand                                |                                                                                                                                                                                                                                                                                                                              |
| IFNGR1 | interferon gamma receptor 1                                          | This gene encodes the ligand-binding chain (alpha) of the gamma interferon receptor.                                                                                                                                                                                                                                         |
| IL2RG  | interleukin 2 receptor, gamma (severe combined immunodeficiency)     | The interleukin 2 (IL2) receptor gamma chain (IL2RG), an important signalling component of many interleukin receptors (IL2,IL4,IL7,IL9, and IL15).                                                                                                                                                                           |
| IL4R   | interleukin 4 receptor                                               | This protein can bind interleukin 4 to promote differentiation of Th2 cells, can be produced by an alternate splice variant or by proteolysis of the membrane-bound protein, and can inhibit IL4-mediated cell proliferation and IL5 upregulation by T-cells.                                                                |
| IL6R   | interleukin 6 receptor                                               | Interleukin 6 (IL6) is a potent pleiotropic cytokine that regulates cell growth and differentiation and plays an important role in immune response.                                                                                                                                                                          |
| IL7R   | interleukin 7 receptor                                               | This protein has been shown to play a critical role in the V(D)J recombination during lymphocyte development, and to control the accessibility of the TCR gamma locus by STAT5 and histone acetylation.                                                                                                                      |
| IRF1   | interferon regulatory factor 1                                       | IRF1 is a transcription activator of genes induced by interferons alpha, beta, and gamma. It also plays roles in regulating apoptosis and tumor-suppressoion.                                                                                                                                                                |
| IRF2   | interferon regulatory factor 2                                       | IRF2 competitively inhibits the IRF1-mediated transcriptional activation of interferons alpha and beta, and presumably other genes that employ IRF1 for transcription activation. However, IRF2 also functions as a transcriptional activator of histone H4.                                                                 |
| ITGB2  | integrin, beta 2 (complement component 3 receptor 3 and 4 subunit)   | Integrins are known to participate in cell adhesion as well as cell-surface mediated signalling.                                                                                                                                                                                                                             |
| JAK1   | Janus kinase 1                                                       | JAK1 is involved in the interferon-alpha/beta and -gamma signal transduction pathways. These kinases couple cytokine ligand binding to tyrosine phosphorylation of various known signaling proteins and of a unique family of transcription factors termed the signal transducers and activators of transcription, or STATs. |
| JMJD6  | jumonji domain containing 6                                          | JmjC domain-containing proteins are predicted to function as protein hydroxylases or histone demethylases.                                                                                                                                                                                                                   |
| LYN    | v-src-1 Yamaguchi sarcoma viral related oncogene homolog             |                                                                                                                                                                                                                                                                                                                              |
| MAFB   | v-maf musculoaponeurotic fibrosarcoma oncogene homolog B (avian)     | This protein plays an important role in the regulation of lineage-specific hematopoiesis. It represses ETS1-mediated transcription of erythroid-specific genes in myeloid cells.                                                                                                                                             |
| MAP3K7 | mitogen-activated protein kinase kinase kinase 7                     | This kinase mediates the signaling transduction induced by TGF beta and morphogenetic protein (BMP), and controls a variety of cell functions including transcription regulation and apoptosis.This kinase can play a role in the cell response to environmental stresses.                                                   |
| NBN    | nibrin                                                               | This gene product is thought to be involved in DNA double-strand break repair and DNA damage-induced checkpoint activation.                                                                                                                                                                                                  |
| NFKB1  | nuclear factor of kappa light polypeptide gene enhancer in B-cells 1 | NFKB is a transcription regulator that is activated by various intra- and extra-cellular stimuli such as cytokines, oxidant-free radicals, ultraviolet irradiation, and bacterial or viral products.                                                                                                                         |

|         |                                                                                                   |                                                                                                                                                                                                                                                                                                                                                    |
|---------|---------------------------------------------------------------------------------------------------|----------------------------------------------------------------------------------------------------------------------------------------------------------------------------------------------------------------------------------------------------------------------------------------------------------------------------------------------------|
| NFKB2   | nuclear factor of kappa light polypeptide gene enhancer in B-cells 2 (p49/p100)                   | NFKB has been detected in numerous cell types that express cytokines, chemokines, growth factors, cell adhesion molecules, and some acute phase proteins in health and in various disease states. NFKB is activated by a wide variety of stimuli.                                                                                                  |
| NFYA    | nuclear transcription factor Y, alpha                                                             | This protein is one subunit of a trimeric complex, forming a highly conserved transcription factor that binds to CCAAT motifs in the promoter regions in a variety of genes.                                                                                                                                                                       |
| NOTCH3  | Notch homolog 3 (Drosophila)                                                                      | Notch interaction with its cell-bound ligands (delta, serrate) establishes an intercellular signalling pathway that plays a key role in neural development.                                                                                                                                                                                        |
| PIK3R1  | phosphoinositide-3-kinase, regulatory subunit 1 (alpha)                                           | Phosphatidylinositol 3-kinase plays an important role in the metabolic actions of insulin.                                                                                                                                                                                                                                                         |
| PRKCQ   | protein kinase C, theta                                                                           | This protein is one of the PKC family members important for T-cell activation, and may link the T cell receptor (TCR) signaling complex to the activation of the transcription factors.                                                                                                                                                            |
| PRNP    | prion protein                                                                                     | This protein is a membrane glycosylphosphatidylinositol-anchored glycoprotein that tends to aggregate into rod-like structures.                                                                                                                                                                                                                    |
| PTPN2   | protein tyrosine phosphatase, non-receptor type 2                                                 | This protein regulates a variety of cellular processes including cell growth, differentiation, mitotic cycle, and oncogenic transformation.                                                                                                                                                                                                        |
| RALBP1  | ralA binding protein 1                                                                            |                                                                                                                                                                                                                                                                                                                                                    |
| RUNX1   | runt-related transcription factor 1                                                               | This protein is thought to be involved in the development of normal hematopoiesis.                                                                                                                                                                                                                                                                 |
| SMARCA5 | SWI/SNF related, matrix associated, actin dependent regulator of chromatin, subfamily a, member 5 | This protein is a component of the chromatin remodeling and spacing factor RSF, a facilitator of the transcription of class II genes by RNA polymerase II.                                                                                                                                                                                         |
| SOD1    | superoxide dismutase 1, soluble                                                                   | This protein binds copper and zinc ions and is one of two isozymes responsible for destroying free superoxide radicals in the body.                                                                                                                                                                                                                |
| SRF     | serum response factor (c-fos serum response element-binding transcription factor)                 | This protein stimulates both cell proliferation and differentiation. It participates in cell cycle regulation, apoptosis, cell growth, and cell differentiation.                                                                                                                                                                                   |
| STAT1   | signal transducer and activator of transcription 1, 91kDa                                         | This protein mediates the expression of a variety of genes, which is thought to be important for cell viability in response to different cell stimuli and pathogens.                                                                                                                                                                               |
| STAT3   | signal transducer and activator of transcription 3 (acute-phase response factor)                  | This protein mediates the expression of a variety of genes in response to cell stimuli, and thus plays a key role in many cellular processes such as cell growth and apoptosis.                                                                                                                                                                    |
| STAT6   | signal transducer and activator of transcription 6, interleukin-4 induced                         | This protein plays a central role in exerting IL4 mediated biological responses. It is found to induce the expression of BCL2L1/BCL-X(L), which is responsible for the anti-apoptotic activity of IL4. It also plays a role in differentiation of T helper 2 (Th2) cells, expression of cell surface markers, and class switch of immunoglobulins. |

|        |                                                                                                        |                                                                                                                                                                                                                                                                                                  |
|--------|--------------------------------------------------------------------------------------------------------|--------------------------------------------------------------------------------------------------------------------------------------------------------------------------------------------------------------------------------------------------------------------------------------------------|
| SYK    | spleen tyrosine kinase                                                                                 |                                                                                                                                                                                                                                                                                                  |
| TAPBP  | TAP binding protein (tapasin)                                                                          | This glycoprotein which mediates interaction between newly assembled major histocompatibility complex (MHC) class I molecules and the transporter associated with antigen processing (TAP), which is required for the transport of antigenic peptides across the endoplasmic reticulum membrane. |
| TGFBR2 | transforming growth factor, beta receptor II (70/80kDa)                                                | This receptor regulates the transcription of a subset of genes related to cell proliferation.                                                                                                                                                                                                    |
| THBS1  | thrombospondin 1                                                                                       | This protein is an adhesive glycoprotein that mediates cell-to-cell and cell-to-matrix interactions. It plays roles in platelet aggregation, angiogenesis, and tumorigenesis.                                                                                                                    |
| TP53   | tumor protein p53                                                                                      | This gene encodes tumor protein p53, which responds to diverse cellular stresses to regulate target genes that induce cell cycle arrest, apoptosis, senescence, DNA repair, or changes in metabolism.                                                                                            |
| UBE2N  | ubiquitin-conjugating enzyme E2N (UBC13 homolog, yeast)                                                | The modification of proteins with ubiquitin is an important cellular mechanism for targeting abnormal or short-lived proteins for degradation.                                                                                                                                                   |
| VAV3   | vav 3 guanine nucleotide exchange factor                                                               | This protein associates maximally with the nucleotide-free states of these GTPases.                                                                                                                                                                                                              |
| XRCC5  | X-ray repair complementing defective repair in Chinese hamster cells 5 (double-strand-break rejoining) | This gene functionally complements Chinese hamster xrs-6, a mutant defective in DNA double-strand break repair and in ability to undergo V(D)J recombination.                                                                                                                                    |

Hematological System Development and Function, Hematopoiesis: Development: Development of Leukocytes (6.32E-04)

|        |                                               |                                                                                                                                                                                                                                         |
|--------|-----------------------------------------------|-----------------------------------------------------------------------------------------------------------------------------------------------------------------------------------------------------------------------------------------|
| ADAM17 | ADAM metalloproteinase domain 17              | This protein functions as a tumor necrosis factor-alpha converting enzyme; binds mitotic arrest deficient 2 protein, and also plays a prominent role in the activation of the Notch signaling pathway.                                  |
| ADAR   | adenosine deaminase, RNA-specific             | This gene encodes the enzyme responsible for RNA editing by site-specific deamination of adenosines.                                                                                                                                    |
| AKT1   | v-akt murine thymoma viral oncogene homolog 1 | In the developing nervous system AKT is a critical mediator of growth factor-induced neuronal survival. Survival factors can suppress apoptosis.                                                                                        |
| AKT2   | v-akt murine thymoma viral oncogene homolog 2 | This gene is a putative oncogene encoding a subfamily of serine/threonine kinases containing SH2-like (Src homology 2-like) domains. The encoded protein is a general protein kinase capable of phosphorylating several known proteins. |
| B2M    | beta-2-microglobulin                          | Beta-2-microglobulin is a serum protein found in association with the major histocompatibility complex (MHC) class I heavy chain on the surface of nearly all nucleated cells.                                                          |
| BAX    | BCL2-associated X protein                     | This protein forms a heterodimer with BCL2, and functions as an apoptotic activator.                                                                                                                                                    |

|        |                                                                  |                                                                                                                                                                                                                                                               |
|--------|------------------------------------------------------------------|---------------------------------------------------------------------------------------------------------------------------------------------------------------------------------------------------------------------------------------------------------------|
| CCND1  | cyclin D1                                                        | This cyclin is required for cell cycle G1/S transition. It interacts with tumor suppressor protein Rb and the expression of this gene is regulated positively by Rb.                                                                                          |
| CD69   | CD69 molecule                                                    | Expression of this protein is induced upon activation of T lymphocytes, and may play a role in proliferation. It may act to transmit signals in natural killer cells and platelets.                                                                           |
| CD81   | CD81 molecule                                                    | This protein appears to promote muscle cell fusion and support myotube maintenance, and may be involved in signal transduction.                                                                                                                               |
| CD83   | CD83 molecule                                                    |                                                                                                                                                                                                                                                               |
| CHD4   | chromodomain helicase DNA binding protein 4                      | This protein is the main component of the nucleosome remodeling and deacetylase complex and plays an important role in epigenetic transcriptional repression.                                                                                                 |
| CREB1  | cAMP responsive element binding protein 1                        | This protein induces transcription of genes in response to hormonal stimulation of the cAMP pathway.                                                                                                                                                          |
| CXCR4  | chemokine (C-X-C motif) receptor 4                               | This protein acts with the CD4 protein to support HIV entry into cells and is also highly expressed in breast cancer cells.                                                                                                                                   |
| DICER1 | dicer 1, ribonuclease type III                                   | This ribonuclease is required by the RNA interference and small temporal RNA pathways to produce the active small RNA component that represses gene expression.                                                                                               |
| EGR1   | early growth response 1                                          | This protein is a transcriptional regulator required for differentiation and mitogenesis.                                                                                                                                                                     |
| FADD   | Fas (TNFRSF6)-associated via death domain                        | The protein encoded by this gene is an adaptor molecule that interacts with various cell surface receptors and mediates cell apoptotic signals.                                                                                                               |
| FCGR2A | Fc fragment of IgG, low affinity IIa, receptor (CD32)            | This protein is a cell surface receptor found on phagocytic cells such as macrophages and neutrophils, and is involved in the process of phagocytosis and clearing of immune complexes.                                                                       |
| FOS    | v-fos FBJ murine osteosarcoma viral oncogene homolog             | The FOS proteins have been implicated as regulators of cell proliferation, differentiation, transformation, and apoptotic cell death.                                                                                                                         |
| FUS    | fusion (involved in t(12;16) in malignant liposarcoma)           |                                                                                                                                                                                                                                                               |
| ICAM1  | intercellular adhesion molecule 1                                | This gene encodes a cell surface glycoprotein which is typically expressed on endothelial cells and cells of the immune system.                                                                                                                               |
| ICOSLG | inducible T-cell co-stimulator ligand                            |                                                                                                                                                                                                                                                               |
| IFNGR1 | interferon gamma receptor 1                                      | This gene encodes the ligand-binding chain (alpha) of the gamma interferon receptor.                                                                                                                                                                          |
| IL2RG  | interleukin 2 receptor, gamma (severe combined immunodeficiency) | The interleukin 2 (IL2) receptor gamma chain (IL2RG), an important signalling component of many interleukin receptors (IL2,IL4,IL7,IL9, and IL15).                                                                                                            |
| IL4R   | interleukin 4 receptor                                           | This protein can bind interleukin 4 to promote differentiation of Th2 cells, can be produced by an alternate splice variant or by proteolysis of the membrane-bound protein, and can inhibit IL4-mediated cell proliferation and IL5 upregulation by T-cells. |
| IL7R   | interleukin 7 receptor                                           | This protein has been shown to play a critical role in the V(D)J recombination during lymphocyte development, and to control the accessibility of the TCR gamma locus by STAT5 and histone acetylation.                                                       |

|        |                                                                                 |                                                                                                                                                                                                                                                                                                                              |
|--------|---------------------------------------------------------------------------------|------------------------------------------------------------------------------------------------------------------------------------------------------------------------------------------------------------------------------------------------------------------------------------------------------------------------------|
| IRF1   | interferon regulatory factor 1                                                  | IRF1 is a transcription activator of genes induced by interferons alpha, beta, and gamma. It also plays roles in regulating apoptosis and tumor-suppression.                                                                                                                                                                 |
| IRF2   | interferon regulatory factor 2                                                  | IRF2 competitively inhibits the IRF1-mediated transcriptional activation of interferons alpha and beta, and presumably other genes that employ IRF1 for transcription activation. However, IRF2 also functions as a transcriptional activator of histone H4.                                                                 |
| ITGB2  | integrin, beta 2 (complement component 3 receptor 3 and 4 subunit)              | Integrins are known to participate in cell adhesion as well as cell-surface mediated signalling.                                                                                                                                                                                                                             |
| JAK1   | Janus kinase 1                                                                  | JAK1 is involved in the interferon-alpha/beta and -gamma signal transduction pathways. These kinases couple cytokine ligand binding to tyrosine phosphorylation of various known signaling proteins and of a unique family of transcription factors termed the signal transducers and activators of transcription, or STATs. |
| LYN    | v-src-1 Yamaguchi sarcoma viral related oncogene homolog                        |                                                                                                                                                                                                                                                                                                                              |
| MAFB   | v-maf musculoaponeurotic fibrosarcoma oncogene homolog B (avian)                | This protein plays an important role in the regulation of lineage-specific hematopoiesis. It represses ETS1-mediated transcription of erythroid-specific genes in myeloid cells.                                                                                                                                             |
| MAP3K7 | mitogen-activated protein kinase kinase kinase 7                                | This kinase mediates the signaling transduction induced by TGF beta and morphogenetic protein (BMP), and controls a variety of cell functions including transcription regulation and apoptosis. This kinase can play a role in the cell response to environmental stresses.                                                  |
| NBN    | nibrin                                                                          | This gene product is thought to be involved in DNA double-strand break repair and DNA damage-induced checkpoint activation.                                                                                                                                                                                                  |
| NFKB1  | nuclear factor of kappa light polypeptide gene enhancer in B-cells 1            | NFKB is a transcription regulator that is activated by various intra- and extra-cellular stimuli such as cytokines, oxidant-free radicals, ultraviolet irradiation, and bacterial or viral products.                                                                                                                         |
| NFKB2  | nuclear factor of kappa light polypeptide gene enhancer in B-cells 2 (p49/p100) | NFKB has been detected in numerous cell types that express cytokines, chemokines, growth factors, cell adhesion molecules, and some acute phase proteins in health and in various disease states. NFKB is activated by a wide variety of stimuli.                                                                            |
| NFYA   | nuclear transcription factor Y, alpha                                           | This protein is one subunit of a trimeric complex, forming a highly conserved transcription factor that binds to CCAAT motifs in the promoter regions in a variety of genes.                                                                                                                                                 |
| NOTCH3 | Notch homolog 3 (Drosophila)                                                    | Notch interaction with its cell-bound ligands (delta, serrate) establishes an intercellular signalling pathway that plays a key role in neural development.                                                                                                                                                                  |
| PIK3R1 | phosphoinositide-3-kinase, regulatory subunit 1 (alpha)                         | Phosphatidylinositol 3-kinase plays an important role in the metabolic actions of insulin.                                                                                                                                                                                                                                   |
| PRKCQ  | protein kinase C, theta                                                         | This protein is one of the PKC family members important for T-cell activation, and may link the T cell receptor (TCR) signaling complex to the activation of the transcription factors.                                                                                                                                      |
| PRNP   | prion protein                                                                   | This protein is a membrane glycosylphosphatidylinositol-anchored glycoprotein that tends to aggregate into rod-like structures.                                                                                                                                                                                              |

|        |                                                                                                        |                                                                                                                                                                                                                                                                                                                                                    |
|--------|--------------------------------------------------------------------------------------------------------|----------------------------------------------------------------------------------------------------------------------------------------------------------------------------------------------------------------------------------------------------------------------------------------------------------------------------------------------------|
| PTPN2  | protein tyrosine phosphatase, non-receptor type 2                                                      | This protein regulates a variety of cellular processes including cell growth, differentiation, mitotic cycle, and oncogenic transformation.                                                                                                                                                                                                        |
| RALBP1 | ralA binding protein 1                                                                                 |                                                                                                                                                                                                                                                                                                                                                    |
| SRF    | serum response factor (c-fos serum response element-binding transcription factor)                      | This protein stimulates both cell proliferation and differentiation. It participates in cell cycle regulation, apoptosis, cell growth, and cell differentiation.                                                                                                                                                                                   |
| STAT1  | signal transducer and activator of transcription 1, 91kDa                                              | This protein mediates the expression of a variety of genes, which is thought to be important for cell viability in response to different cell stimuli and pathogens.                                                                                                                                                                               |
| STAT3  | signal transducer and activator of transcription 3 (acute-phase response factor)                       | This protein mediates the expression of a variety of genes in response to cell stimuli, and thus plays a key role in many cellular processes such as cell growth and apoptosis.                                                                                                                                                                    |
| STAT6  | signal transducer and activator of transcription 6, interleukin-4 induced                              | This protein plays a central role in exerting IL4 mediated biological responses. It is found to induce the expression of BCL2L1/BCL-X(L), which is responsible for the anti-apoptotic activity of IL4. It also plays a role in differentiation of T helper 2 (Th2) cells, expression of cell surface markers, and class switch of immunoglobulins. |
| SYK    | spleen tyrosine kinase                                                                                 |                                                                                                                                                                                                                                                                                                                                                    |
| TAPBP  | TAP binding protein (tapasin)                                                                          | This glycoprotein which mediates interaction between newly assembled major histocompatibility complex (MHC) class I molecules and the transporter associated with antigen processing (TAP), which is required for the transport of antigenic peptides across the endoplasmic reticulum membrane.                                                   |
| TGFBR2 | transforming growth factor, beta receptor II (70/80kDa)                                                | This receptor regulates the transcription of a subset of genes related to cell proliferation.                                                                                                                                                                                                                                                      |
| TP53   | tumor protein p53                                                                                      | This gene encodes tumor protein p53, which responds to diverse cellular stresses to regulate target genes that induce cell cycle arrest, apoptosis, senescence, DNA repair, or changes in metabolism.                                                                                                                                              |
| UBE2N  | ubiquitin-conjugating enzyme E2N (UBC13 homolog, yeast)                                                | The modification of proteins with ubiquitin is an important cellular mechanism for targeting abnormal or short-lived proteins for degradation.                                                                                                                                                                                                     |
| VAV3   | vav 3 guanine nucleotide exchange factor                                                               | This protein associates maximally with the nucleotide-free states of these GTPases.                                                                                                                                                                                                                                                                |
| XRCC5  | X-ray repair complementing defective repair in Chinese hamster cells 5 (double-strand-break rejoining) | This gene functionally complements Chinese hamster xrs-6, a mutant defective in DNA double-strand break repair and in ability to undergo V(D)J recombination.                                                                                                                                                                                      |

---

Hematological System Development and Function, Hematopoiesis: Development: Development of Lymphocytes (6.83E-04), Development of T Lymphocytes (6.83E-04)

|        |                                               |                                                                                                                                                                                                                                         |
|--------|-----------------------------------------------|-----------------------------------------------------------------------------------------------------------------------------------------------------------------------------------------------------------------------------------------|
| ADAM17 | ADAM metallopeptidase domain 17               | This protein functions as a tumor necrosis factor-alpha converting enzyme; binds mitotic arrest deficient 2 protein, and also plays a prominent role in the activation of the Notch signaling pathway.                                  |
| AKT1   | v-akt murine thymoma viral oncogene homolog 1 | In the developing nervous system AKT is a critical mediator of growth factor-induced neuronal survival. Survival factors can suppress apoptosis.                                                                                        |
| AKT2   | v-akt murine thymoma viral oncogene homolog 2 | This gene is a putative oncogene encoding a subfamily of serine/threonine kinases containing SH2-like (Src homology 2-like) domains. The encoded protein is a general protein kinase capable of phosphorylating several known proteins. |
| B2M    | beta-2-microglobulin                          | Beta-2-microglobulin is a serum protein found in association with the major histocompatibility complex (MHC) class I heavy chain on the surface of nearly all nucleated cells.                                                          |
| BAX    | BCL2-associated X protein                     | This protein forms a heterodimer with BCL2, and functions as an apoptotic activator.                                                                                                                                                    |
| CCND1  | cyclin D1                                     | This cyclin is required for cell cycle G1/S transition. It interacts with tumor suppressor protein Rb and the expression of this gene is regulated positively by Rb.                                                                    |
| CD69   | CD69 molecule                                 | Expression of this protein is induced upon activation of T lymphocytes, and may play a role in proliferation. It may act to transmit signals in natural killer cells and platelets.                                                     |
| CD83   | CD83 molecule                                 |                                                                                                                                                                                                                                         |
| CHD4   | chromodomain helicase DNA binding protein 4   | This protein is the main component of the nucleosome remodeling and deacetylase complex and plays an important role in epigenetic transcriptional repression.                                                                           |
| CREB1  | cAMP responsive element binding protein 1     | This protein induces transcription of genes in response to hormonal stimulation of the cAMP pathway.                                                                                                                                    |
| CXCR4  | chemokine (C-X-C motif) receptor 4            | This protein acts with the CD4 protein to support HIV entry into cells and is also highly expressed in breast cancer cells.                                                                                                             |
| DICER1 | dicer 1, ribonuclease type III                | This ribonuclease is required by the RNA interference and small temporal RNA pathways to produce the active small RNA component that represses gene expression.                                                                         |
| EGR1   | early growth response 1                       | This protein is a transcriptional regulator required for differentiation and mitogenesis.                                                                                                                                               |
| FADD   | Fas (TNFRSF6)-associated via death domain     | The protein encoded by this gene is an adaptor molecule that interacts with various cell surface receptors and mediates cell apoptotic signals.                                                                                         |

|        |                                                                      |                                                                                                                                                                                                                                                                                                                              |
|--------|----------------------------------------------------------------------|------------------------------------------------------------------------------------------------------------------------------------------------------------------------------------------------------------------------------------------------------------------------------------------------------------------------------|
| FCGR2A | Fc fragment of IgG, low affinity IIa, receptor (CD32)                | This protein is a cell surface receptor found on phagocytic cells such as macrophages and neutrophils, and is involved in the process of phagocytosis and clearing of immune complexes.                                                                                                                                      |
| FOS    | v-fos FBJ murine osteosarcoma viral oncogene homolog                 | The FOS proteins have been implicated as regulators of cell proliferation, differentiation, transformation, and apoptotic cell death.                                                                                                                                                                                        |
| FUS    | fusion (involved in t(12;16) in malignant liposarcoma)               |                                                                                                                                                                                                                                                                                                                              |
| ICAM1  | intercellular adhesion molecule 1                                    | This gene encodes a cell surface glycoprotein which is typically expressed on endothelial cells and cells of the immune system.                                                                                                                                                                                              |
| ICOSLG | inducible T-cell co-stimulator ligand                                |                                                                                                                                                                                                                                                                                                                              |
| IL2RG  | interleukin 2 receptor, gamma (severe combined immunodeficiency)     | The interleukin 2 (IL2) receptor gamma chain (IL2RG), an important signalling component of many interleukin receptors (IL2,IL4,IL7,IL9, and IL15).                                                                                                                                                                           |
| IL4R   | interleukin 4 receptor                                               | This protein can bind interleukin 4 to promote differentiation of Th2 cells, can be produced by an alternate splice variant or by proteolysis of the membrane-bound protein, and can inhibit IL4-mediated cell proliferation and IL5 upregulation by T-cells.                                                                |
| IL7R   | interleukin 7 receptor                                               | This protein has been shown to play a critical role in the V(D)J recombination during lymphocyte development, and to control the accessibility of the TCR gamma locus by STAT5 and histone acetylation.                                                                                                                      |
| IRF1   | interferon regulatory factor 1                                       | IRF1 is a transcription activator of genes induced by interferons alpha, beta, and gamma. It also plays roles in regulating apoptosis and tumor-suppression.                                                                                                                                                                 |
| ITGB2  | integrin, beta 2 (complement component 3 receptor 3 and 4 subunit)   | Integrins are known to participate in cell adhesion as well as cell-surface mediated signalling.                                                                                                                                                                                                                             |
| JAK1   | Janus kinase 1                                                       | JAK1 is involved in the interferon-alpha/beta and -gamma signal transduction pathways. These kinases couple cytokine ligand binding to tyrosine phosphorylation of various known signaling proteins and of a unique family of transcription factors termed the signal transducers and activators of transcription, or STATs. |
| LYN    | v-yes-1 Yamaguchi sarcoma viral related oncogene homolog             |                                                                                                                                                                                                                                                                                                                              |
| MAP3K7 | mitogen-activated protein kinase kinase kinase 7                     | This kinase mediates the signaling transduction induced by TGF beta and morphogenetic protein (BMP), and controls a variety of cell functions including transcription regulation and apoptosis. This kinase can play a role in the cell response to environmental stresses.                                                  |
| NBN    | nibrin                                                               | This gene product is thought to be involved in DNA double-strand break repair and DNA damage-induced checkpoint activation.                                                                                                                                                                                                  |
| NFKB1  | nuclear factor of kappa light polypeptide gene enhancer in B-cells 1 | NFKB is a transcription regulator that is activated by various intra- and extra-cellular stimuli such as cytokines, oxidant-free radicals, ultraviolet irradiation, and bacterial or viral products.                                                                                                                         |

|        |                                                                                   |                                                                                                                                                                                                                                                                                                                                                    |
|--------|-----------------------------------------------------------------------------------|----------------------------------------------------------------------------------------------------------------------------------------------------------------------------------------------------------------------------------------------------------------------------------------------------------------------------------------------------|
| NFKB2  | nuclear factor of kappa light polypeptide gene enhancer in B-cells 2 (p49/p100)   | NFKB has been detected in numerous cell types that express cytokines, chemokines, growth factors, cell adhesion molecules, and some acute phase proteins in health and in various disease states. NFKB is activated by a wide variety of stimuli.                                                                                                  |
| NOTCH3 | Notch homolog 3 (Drosophila)                                                      | Notch interaction with its cell-bound ligands (delta, serrate) establishes an intercellular signalling pathway that plays a key role in neural development.                                                                                                                                                                                        |
| PIK3R1 | phosphoinositide-3-kinase, regulatory subunit 1 (alpha)                           | Phosphatidylinositol 3-kinase plays an important role in the metabolic actions of insulin.                                                                                                                                                                                                                                                         |
| PRKCQ  | protein kinase C, theta                                                           | This protein is one of the PKC family members important for T-cell activation, and may link the T cell receptor (TCR) signaling complex to the activation of the transcription factors.                                                                                                                                                            |
| PRNP   | prion protein                                                                     | This protein is a membrane glycosylphosphatidylinositol-anchored glycoprotein that tends to aggregate into rod-like structures.                                                                                                                                                                                                                    |
| PTPN2  | protein tyrosine phosphatase, non-receptor type 2                                 | This protein regulates a variety of cellular processes including cell growth, differentiation, mitotic cycle, and oncogenic transformation.                                                                                                                                                                                                        |
| SRF    | serum response factor (c-fos serum response element-binding transcription factor) | This protein stimulates both cell proliferation and differentiation. It participates in cell cycle regulation, apoptosis, cell growth, and cell differentiation.                                                                                                                                                                                   |
| STAT1  | signal transducer and activator of transcription 1, 91kDa                         | This protein mediates the expression of a variety of genes, which is thought to be important for cell viability in response to different cell stimuli and pathogens.                                                                                                                                                                               |
| STAT3  | signal transducer and activator of transcription 3 (acute-phase response factor)  | This protein mediates the expression of a variety of genes in response to cell stimuli, and thus plays a key role in many cellular processes such as cell growth and apoptosis.                                                                                                                                                                    |
| STAT6  | signal transducer and activator of transcription 6, interleukin-4 induced         | This protein plays a central role in exerting IL4 mediated biological responses. It is found to induce the expression of BCL2L1/BCL-X(L), which is responsible for the anti-apoptotic activity of IL4. It also plays a role in differentiation of T helper 2 (Th2) cells, expression of cell surface markers, and class switch of immunoglobulins. |
| SYK    | spleen tyrosine kinase                                                            |                                                                                                                                                                                                                                                                                                                                                    |
| TAPBP  | TAP binding protein (tapasin)                                                     | This glycoprotein which mediates interaction between newly assembled major histocompatibility complex (MHC) class I molecules and the transporter associated with antigen processing (TAP), which is required for the transport of antigenic peptides across the endoplasmic reticulum membrane.                                                   |
| TGFBR2 | transforming growth factor, beta receptor II (70/80kDa)                           | This receptor regulates the transcription of a subset of genes related to cell proliferation.                                                                                                                                                                                                                                                      |
| TP53   | tumor protein p53                                                                 | This gene encodes tumor protein p53, which responds to diverse cellular stresses to regulate target genes that induce cell cycle arrest, apoptosis, senescence, DNA repair, or changes in metabolism.                                                                                                                                              |
| UBE2N  | ubiquitin-conjugating enzyme E2N (UBC13 homolog, yeast)                           | The modification of proteins with ubiquitin is an important cellular mechanism for targeting abnormal or short-lived proteins for degradation.                                                                                                                                                                                                     |

|       |                                                                                                        |                                                                                                                                                               |
|-------|--------------------------------------------------------------------------------------------------------|---------------------------------------------------------------------------------------------------------------------------------------------------------------|
| VAV3  | vav 3 guanine nucleotide exchange factor                                                               | This protein associates maximally with the nucleotide-free states of these GTPases.                                                                           |
| XRCC5 | X-ray repair complementing defective repair in Chinese hamster cells 5 (double-strand-break rejoining) | This gene functionally complements Chinese hamster xrs-6, a mutant defective in DNA double-strand break repair and in ability to undergo V(D)J recombination. |

Hematological System  
Development and Function:  
Proliferation:  
Proliferation of Leukocytes (7.07E-04),  
Proliferation of Mononuclear Leukocytes (6.37E-04)

|        |                                                  |                                                                                                                                                                                                                                              |
|--------|--------------------------------------------------|----------------------------------------------------------------------------------------------------------------------------------------------------------------------------------------------------------------------------------------------|
| ACPP   | acid phosphatase, prostate                       | This gene encodes an enzyme that catalyzes the conversion of orthophosphoric monoester to alcohol and orthophosphate.                                                                                                                        |
| AKAP13 | A kinase (PRKA) anchor protein 13                | This protein family is a group of structurally diverse proteins, which have the common function of binding to the regulatory subunit of protein kinase A (PKA) and confining the holoenzyme to discrete locations within the cell.           |
| AKT1   | v-akt murine thymoma viral oncogene homolog 1    | In the developing nervous system AKT is a critical mediator of growth factor-induced neuronal survival. Survival factors can suppress apoptosis.                                                                                             |
| BAX    | BCL2-associated X protein                        | This protein forms a heterodimer with BCL2, and functions as an apoptotic activator.                                                                                                                                                         |
| BRAF   | v-raf murine sarcoma viral oncogene homolog B1   | This protein plays a role in regulating the MAP kinase/ERKs signaling pathway, which affects cell division, differentiation, and secretion.                                                                                                  |
| BSG    | basigin (Ok blood group)                         | This protein is a plasma membrane protein that is important in spermatogenesis, embryo implantation, neural network formation, and tumor progression.                                                                                        |
| CCL4   | chemokine (C-C motif) ligand 4                   |                                                                                                                                                                                                                                              |
| CD44   | CD44 molecule (Indian blood group)               | This protein participates in a wide variety of cellular functions including lymphocyte activation, recirculation and homing, hematopoiesis, and tumor metastasis.                                                                            |
| CD58   | CD58 molecule                                    | This protein functions in adhesion and activation of T lymphocytes.                                                                                                                                                                          |
| CD81   | CD81 molecule                                    | This protein appears to promote muscle cell fusion and support myotube maintenance, and may be involved in signal transduction.                                                                                                              |
| CD83   | CD83 molecule                                    |                                                                                                                                                                                                                                              |
| CDKN1A | cyclin-dependent kinase inhibitor 1A (p21, Cip1) | This protein functions as a regulator of cell cycle progression at G1. It also plays a regulatory role in S phase DNA replication and DNA damage repair, and may be instrumental in the execution of apoptosis following caspase activation. |

|         |                                                                                  |                                                                                                                                                                                                                                                                                                                                              |
|---------|----------------------------------------------------------------------------------|----------------------------------------------------------------------------------------------------------------------------------------------------------------------------------------------------------------------------------------------------------------------------------------------------------------------------------------------|
| CDKN2A  | cyclin-dependent kinase inhibitor 2A (melanoma, p16, inhibits CDK4)              | This ARF product functions as a stabilizer of the tumor suppressor protein p53 as it can interact with, and sequester, MDM1, a protein responsible for the degradation of p53. It has a common functionality in cell cycle G1 control.                                                                                                       |
| CDKN2B  | cyclin-dependent kinase inhibitor 2B (p15, inhibits CDK4)                        | This cyclin-dependent kinase functions as a cell growth regulator that controls cell cycle G1 progression.                                                                                                                                                                                                                                   |
| CEACAM1 | carcinoembryonic antigen-related cell adhesion molecule 1 (biliary glycoprotein) | Multiple cellular activities have been attributed to this protein, including roles in the differentiation and arrangement of tissue three-dimensional structure, angiogenesis, apoptosis, tumor suppression, metastasis, and the modulation of innate and adaptive immune responses.                                                         |
| CEBPB   | CCAAT/enhancer binding protein (C/EBP), beta                                     | This protein is important in the regulation of genes involved in immune and inflammatory responses. It can also bind the promoter and upstream element and stimulate the expression of the collagen type I gene.                                                                                                                             |
| CFLAR   | CASP8 and FADD-like apoptosis regulator                                          |                                                                                                                                                                                                                                                                                                                                              |
| CXCR4   | chemokine (C-X-C motif) receptor 4                                               | This protein acts with the CD4 protein to support HIV entry into cells and is also highly expressed in breast cancer cells.                                                                                                                                                                                                                  |
| CYLD    | cylindromatosis (turban tumor syndrome)                                          | This protein functions as a deubiquitinating enzyme.                                                                                                                                                                                                                                                                                         |
| DICER1  | dicer 1, ribonuclease type III                                                   | This ribonuclease is required by the RNA interference and small temporal RNA pathways to produce the active small RNA component that represses gene expression.                                                                                                                                                                              |
| DLG1    | discs, large homolog 1 (Drosophila)                                              |                                                                                                                                                                                                                                                                                                                                              |
| DUSP10  | dual specificity phosphatase 10                                                  | This protein binds to and inactivates p38 and SAPK/JNK, but not MAPK/ERK. It is widely expressed in various tissues and organs, and its expression is elevated by stress stimuli.                                                                                                                                                            |
| EGR1    | early growth response 1                                                          | This protein is a transcriptional regulator required for differentiation and mitogenesis.                                                                                                                                                                                                                                                    |
| EIF2AK2 | eukaryotic translation initiation factor 2-alpha kinase 2                        |                                                                                                                                                                                                                                                                                                                                              |
| FADD    | Fas (TNFRSF6)-associated via death domain                                        | The protein encoded by this gene is an adaptor molecule that interacts with various cell surface receptors and mediates cell apoptotic signals.                                                                                                                                                                                              |
| FAS     | Fas (TNF receptor superfamily, member 6)                                         | This protein has been shown to play a central role in the physiological regulation of programmed cell death, and has been implicated in the pathogenesis of various malignancies and diseases of the immune system. This receptor is found to be involved in transducing the proliferating signals in normal diploid fibroblast and T cells. |
| FUS     | fusion (involved in t(12;16) in malignant liposarcoma)                           |                                                                                                                                                                                                                                                                                                                                              |
| GABPB2  | GA binding protein transcription factor, beta subunit 2                          |                                                                                                                                                                                                                                                                                                                                              |

|           |                                                                                          |                                                                                                                                                                                                                                                               |
|-----------|------------------------------------------------------------------------------------------|---------------------------------------------------------------------------------------------------------------------------------------------------------------------------------------------------------------------------------------------------------------|
| GCNT1     | glucosaminyl (N-acetyl) transferase 1, core 2 (beta-1,6-N-acetylglucosaminyltransferase) | This protein is essential to the formation of Gal beta 1-3(GlcNAc beta 1-6)GalNAc structures and the core 2 O-glycan branch.                                                                                                                                  |
| GSTP1     | glutathione S-transferase pi 1                                                           | This GST family member functions in xenobiotic metabolism and play a role in susceptibility to cancer, and other diseases.                                                                                                                                    |
| HLA-E     | major histocompatibility complex, class I, E                                             | HLA-E belongs to the HLA class I heavy chain paralogues. HLA-E binds a restricted subset of peptides derived from the leader peptides of other class I molecules.                                                                                             |
| HNRNPA2B1 | heterogeneous nuclear ribonucleoprotein A2/B1                                            | These proteins are associated with pre-mRNAs in the nucleus and appear to influence pre-mRNA processing and other aspects of mRNA metabolism and transport.                                                                                                   |
| HRH1      | histamine receptor H1                                                                    | This protein mediates the contraction of smooth muscles, the increase in capillary permeability due to contraction of terminal venules, the release of catecholamine from adrenal medulla, and neurotransmission in the central nervous system.               |
| HSP90B1   | heat shock protein 90kDa beta (Grp94), member 1                                          | HSP90 proteins play roles in folding newly synthesized proteins or stabilizing and refolding denatured proteins after stress.                                                                                                                                 |
| HSPD1     | heat shock 60kDa protein 1 (chaperonin)                                                  | This protein may function as a signaling molecule in the innate immune system. It is essential for the folding and assembly of newly imported proteins in the mitochondria.                                                                                   |
| ICAM1     | intercellular adhesion molecule 1                                                        | This gene encodes a cell surface glycoprotein which is typically expressed on endothelial cells and cells of the immune system.                                                                                                                               |
| ICOSLG    | inducible T-cell co-stimulator ligand                                                    |                                                                                                                                                                                                                                                               |
| IFNAR1    | interferon (alpha, beta and omega) receptor 1                                            | Binding and activation of this receptor stimulates Janus protein kinases, it also functions as an antiviral factor.                                                                                                                                           |
| IFNGR1    | interferon gamma receptor 1                                                              | This gene encodes the ligand-binding chain (alpha) of the gamma interferon receptor.                                                                                                                                                                          |
| IKZF2     | IKAROS family zinc finger 2 (Helios)                                                     | This protein is thought to function predominantly in early hematopoietic development.                                                                                                                                                                         |
| IL2RG     | interleukin 2 receptor, gamma (severe combined immunodeficiency)                         | The interleukin 2 (IL2) receptor gamma chain (IL2RG), an important signalling component of many interleukin receptors (IL2,IL4,IL7,IL9, and IL15).                                                                                                            |
| IL4R      | interleukin 4 receptor                                                                   | This protein can bind interleukin 4 to promote differentiation of Th2 cells, can be produced by an alternate splice variant or by proteolysis of the membrane-bound protein, and can inhibit IL4-mediated cell proliferation and IL5 upregulation by T-cells. |
| IL7R      | interleukin 7 receptor                                                                   | This protein has been shown to play a critical role in the V(D)J recombination during lymphocyte development, and to control the accessibility of the TCR gamma locus by STAT5 and histone acetylation.                                                       |
| IMPDH1    | IMP (inosine monophosphate) dehydrogenase 1                                              | The protein encoded by this gene acts as a homotetramer to regulate cell growth. The encoded protein is an enzyme that catalyzes the synthesis of xanthine monophosphate (XMP) from inosine-5'-monophosphate (IMP).                                           |
| ISG20     | interferon stimulated exonuclease gene 20kDa                                             |                                                                                                                                                                                                                                                               |

|         |                                                                            |                                                                                                                                                                                                                                                                                                                                |
|---------|----------------------------------------------------------------------------|--------------------------------------------------------------------------------------------------------------------------------------------------------------------------------------------------------------------------------------------------------------------------------------------------------------------------------|
| ISG15   | ISG15 ubiquitin-like modifier                                              | G1P2 is a ubiquitin-like protein that becomes conjugated to many cellular proteins upon activation by interferon-alpha (IFNA; MIM 147660) and -beta (IFNB; MIM 147640).                                                                                                                                                        |
| ITGAM   | integrin, alpha M<br>(complement component 3 receptor 3 subunit)           | The alpha M beta 2 integrin is important in the adherence of neutrophils and monocytes to stimulated endothelium, and also in the phagocytosis of complement coated particles.                                                                                                                                                 |
| ITGB2   | integrin, beta 2 (complement component 3 receptor 3 and 4 subunit)         | Integrins are known to participate in cell adhesion as well as cell-surface mediated signalling.                                                                                                                                                                                                                               |
| KLF2    | Kruppel-like factor 2 (lung)                                               |                                                                                                                                                                                                                                                                                                                                |
| KLF4    | Kruppel-like factor 4 (gut)                                                |                                                                                                                                                                                                                                                                                                                                |
| LGALS1  | lectin, galactoside-binding, soluble, 1                                    | This protein may act as an autocrine negative growth factor that regulates cell proliferation.                                                                                                                                                                                                                                 |
| LYN     | v-yes-1 Yamaguchi sarcoma viral related oncogene homolog                   |                                                                                                                                                                                                                                                                                                                                |
| MAP2K7  | mitogen-activated protein kinase kinase 7                                  | This kinase is involved in the signal transduction mediating the cell responses to proinflammatory cytokines, and environmental stresses.                                                                                                                                                                                      |
| MAP3K2  | mitogen-activated protein kinase kinase kinase 2                           | This kinase preferentially activates other kinases involved in the MAP kinase signaling pathway. It phosphorylates and activates I kappa B kinases, and so plays a role in NF-kappa B signaling pathway. It also activates protein kinase C-related kinase 2, which suggests its involvement in a regulated signaling process. |
| MAP3K7  | mitogen-activated protein kinase kinase kinase 7                           | This kinase mediates the signaling transduction induced by TGF beta and morphogenetic protein (BMP), and controls a variety of cell functions including transcription regulation and apoptosis. This kinase can play a role in the cell response to environmental stresses.                                                    |
| MDM2    | Mdm2 p53 binding protein homolog (mouse)                                   | This protein is a nuclear phosphoprotein that binds and inhibits transactivation by tumor protein p53, as part of an autoregulatory negative feedback loop. It also affects the cell cycle, apoptosis, and tumorigenesis through interactions with other proteins, including retinoblastoma 1 and ribosomal protein L5.        |
| MEIS1   | Meis homeobox 1                                                            | Homeobox genes, of which the most well-characterized category is represented by the HOX genes, play a crucial role in normal development. In addition, several homeoproteins are involved in neoplasia.                                                                                                                        |
| MLL     | myeloid/lymphoid or mixed-lineage leukemia (trithorax homolog, Drosophila) | The MLL gene encodes a DNA-binding protein that methylates histone H3 (see MIM 601128) lys4 (H3K4) and positively regulates expression of target genes, including multiple HOX genes (see MIM 142980).                                                                                                                         |
| MVP     | major vault protein                                                        | This protein mediates drug resistance, perhaps via a transport process.                                                                                                                                                                                                                                                        |
| NFKB1   | nuclear factor of kappa light polypeptide gene enhancer in B-cells 1       | NFKB is a transcription regulator that is activated by various intra- and extra-cellular stimuli such as cytokines, oxidant-free radicals, ultraviolet irradiation, and bacterial or viral products.                                                                                                                           |
| NOTCH3  | Notch homolog 3 (Drosophila)                                               | Notch interaction with its cell-bound ligands (delta, serrate) establishes an intercellular signalling pathway that plays a key role in neural development.                                                                                                                                                                    |
| NP      | nucleoside phosphorylase                                                   | This protein is an enzyme which reversibly catalyzes the phosphorolysis of purine nucleosides.                                                                                                                                                                                                                                 |
| PIK3AP1 | phosphoinositide-3-kinase adaptor protein 1                                |                                                                                                                                                                                                                                                                                                                                |

|          |                                                                                                                  |                                                                                                                                                                                                                                                                                                                                                |
|----------|------------------------------------------------------------------------------------------------------------------|------------------------------------------------------------------------------------------------------------------------------------------------------------------------------------------------------------------------------------------------------------------------------------------------------------------------------------------------|
| PIK3R1   | phosphoinositide-3-kinase, regulatory subunit 1 (alpha)                                                          | Phosphatidylinositol 3-kinase plays an important role in the metabolic actions of insulin.                                                                                                                                                                                                                                                     |
| PRKCQ    | protein kinase C, theta                                                                                          | This protein is one of the PKC family members important for T-cell activation, and may link the T cell receptor (TCR) signaling complex to the activation of the transcription factors.                                                                                                                                                        |
| PRKCZ    | protein kinase C, zeta                                                                                           | Protein kinase C (PKC) zeta is a member of the PKC family which are involved in a variety of cellular processes such as proliferation, differentiation and secretion.                                                                                                                                                                          |
| PTPN2    | protein tyrosine phosphatase, non-receptor type 2                                                                | This protein regulates a variety of cellular processes including cell growth, differentiation, mitotic cycle, and oncogenic transformation.                                                                                                                                                                                                    |
| PTPN6    | protein tyrosine phosphatase, non-receptor type 6                                                                | This protein is expressed primarily in hematopoietic cells, and functions as an important regulator of multiple signaling pathways in hematopoietic cells. It dephosphorylates a wide spectrum of phospho-proteins involved in hematopoietic cell signaling.                                                                                   |
| PTPRJ    | protein tyrosine phosphatase, receptor type, J                                                                   | This protein, present in all hematopoietic lineages, was shown to negatively regulate T cell receptor signaling possibly through interfering with the phosphorylation of Phospholipase C Gamma 1 and Linker for Activation of T Cells. It also dephosphorylates the PDGF beta receptor, and may be involved in UV-induced signal transduction. |
| PURA     | purine-rich element binding protein A                                                                            | This protein is implicated in the control of both DNA replication and transcription.                                                                                                                                                                                                                                                           |
| RBL2     | retinoblastoma-like 2 (p130)                                                                                     |                                                                                                                                                                                                                                                                                                                                                |
| RGS2     | regulator of G-protein signaling 2, 24kDa                                                                        |                                                                                                                                                                                                                                                                                                                                                |
| RIPK2    | receptor-interacting serine-threonine kinase 2                                                                   | This protein is a component of signaling complexes in both the innate and adaptive immune pathways, and is a potent activator of NF-kappaB and inducer of apoptosis in response to various stimuli.                                                                                                                                            |
| SCGB1A1  | secretoglobin, family 1A, member 1 (uteroglobin)                                                                 |                                                                                                                                                                                                                                                                                                                                                |
| SEMA4D   | sema domain, immunoglobulin domain (Ig), transmembrane domain (TM) and short cytoplasmic domain, (semaphorin) 4D |                                                                                                                                                                                                                                                                                                                                                |
| SERPINA1 | serpin peptidase inhibitor, clade A (alpha-1 antiproteinase, antitrypsin), member 1                              | This protein is a serine protease inhibitor whose targets include elastase, plasmin, thrombin, trypsin, chymotrypsin, and plasminogen activator.                                                                                                                                                                                               |
| SHC1     | SHC (Src homology 2 domain containing) transforming protein 1                                                    |                                                                                                                                                                                                                                                                                                                                                |
| SPP1     | secreted phosphoprotein 1                                                                                        |                                                                                                                                                                                                                                                                                                                                                |

|          |                                                                                  |                                                                                                                                                                                                                                                                                                                                                    |
|----------|----------------------------------------------------------------------------------|----------------------------------------------------------------------------------------------------------------------------------------------------------------------------------------------------------------------------------------------------------------------------------------------------------------------------------------------------|
| STAM2    | signal transducing adaptor molecule (SH3 domain and ITAM motif) 2                | This protein is thought to exhibit compensatory effects on the signaling pathway downstream of JAK kinases upon cytokine stimulation.                                                                                                                                                                                                              |
| STAT1    | signal transducer and activator of transcription 1, 91kDa                        | This protein mediates the expression of a variety of genes, which is thought to be important for cell viability in response to different cell stimuli and pathogens.                                                                                                                                                                               |
| STAT3    | signal transducer and activator of transcription 3 (acute-phase response factor) | This protein mediates the expression of a variety of genes in response to cell stimuli, and thus plays a key role in many cellular processes such as cell growth and apoptosis.                                                                                                                                                                    |
| STAT6    | signal transducer and activator of transcription 6, interleukin-4 induced        | This protein plays a central role in exerting IL4 mediated biological responses. It is found to induce the expression of BCL2L1/BCL-X(L), which is responsible for the anti-apoptotic activity of IL4. It also plays a role in differentiation of T helper 2 (Th2) cells, expression of cell surface markers, and class switch of immunoglobulins. |
| STAT5B   | signal transducer and activator of transcription 5B                              | This protein mediates the signal transduction triggered by various cell ligands, such as IL2, IL4, CSF1, and different growth hormones. It is involved in TCR signaling, apoptosis, adult mammary gland development, and sexual dimorphism of liver gene expression.                                                                               |
| STK17B   | serine/threonine kinase 17b                                                      |                                                                                                                                                                                                                                                                                                                                                    |
| SYK      | spleen tyrosine kinase                                                           |                                                                                                                                                                                                                                                                                                                                                    |
| TGFBR2   | transforming growth factor, beta receptor II (70/80kDa)                          | This receptor regulates the transcription of a subset of genes related to cell proliferation.                                                                                                                                                                                                                                                      |
| THBS1    | thrombospondin 1                                                                 | This protein is an adhesive glycoprotein that mediates cell-to-cell and cell-to-matrix interactions. It plays roles in platelet aggregation, angiogenesis, and tumorigenesis.                                                                                                                                                                      |
| TLR2     | toll-like receptor 2                                                             | This protein encoded by this gene is a member of the Toll-like receptor (TLR) family which plays a fundamental role in pathogen recognition and activation of innate immunity. It mediates host response to Gram-positive bacteria.                                                                                                                |
| TP53     | tumor protein p53                                                                | This gene encodes tumor protein p53, which responds to diverse cellular stresses to regulate target genes that induce cell cycle arrest, apoptosis, senescence, DNA repair, or changes in metabolism.                                                                                                                                              |
| TP53INP1 | tumor protein p53 inducible nuclear protein 1                                    |                                                                                                                                                                                                                                                                                                                                                    |
| TSC22D3  | TSC22 domain family, member 3                                                    | The protein is a leucine zipper protein, that function as a transcriptional regulator. It appears to play a key role in the anti-inflammatory and immunosuppressive effects of this steroid and chemokine.                                                                                                                                         |
| TXN      | thioredoxin                                                                      | Thioredoxin is a 12-kD oxidoreductase enzyme containing a dithiol-disulfide active site.                                                                                                                                                                                                                                                           |
| TYK2     | tyrosine kinase 2                                                                | This protein associates with cytokine receptors and promulgate cytokine signals by phosphorylating receptor subunits. It may play a role in anti-viral immunity.                                                                                                                                                                                   |
| UBE2N    | ubiquitin-conjugating enzyme E2N (UBC13 homolog, yeast)                          | The modification of proteins with ubiquitin is an important cellular mechanism for targeting abnormal or short-lived proteins for degradation.                                                                                                                                                                                                     |
| USF1     | upstream transcription factor 1                                                  | This protein can activate transcription through pyrimidine-rich initiator (Inr) elements and E-box motifs.                                                                                                                                                                                                                                         |

|         |                                                                                                        |                                                                                                                                                               |
|---------|--------------------------------------------------------------------------------------------------------|---------------------------------------------------------------------------------------------------------------------------------------------------------------|
| XRCC5   | X-ray repair complementing defective repair in Chinese hamster cells 5 (double-strand-break rejoining) | This gene functionally complements Chinese hamster xrs-6, a mutant defective in DNA double-strand break repair and in ability to undergo V(D)J recombination. |
| ZFP36L1 | zinc finger protein 36, C3H type-like 1                                                                | This putative nuclear transcription factor most likely functions in regulating the response to growth factors.                                                |

#### Hematological System

#### Development and Function:

#### Proliferation:

Proliferation of Lymphocytes (8.53E-04),  
Proliferation of T Lymphocytes (1.66E-03)

|        |                                                                     |                                                                                                                                                                                                                                              |
|--------|---------------------------------------------------------------------|----------------------------------------------------------------------------------------------------------------------------------------------------------------------------------------------------------------------------------------------|
| ACPP   | acid phosphatase, prostate                                          | This gene encodes an enzyme that catalyzes the conversion of orthophosphoric monoester to alcohol and orthophosphate.                                                                                                                        |
| AKAP13 | A kinase (PRKA) anchor protein 13                                   | This protein family is a group of structurally diverse proteins, which have the common function of binding to the regulatory subunit of protein kinase A (PKA) and confining the holoenzyme to discrete locations within the cell.           |
| AKT1   | v-akt murine thymoma viral oncogene homolog 1                       | In the developing nervous system AKT is a critical mediator of growth factor-induced neuronal survival. Survival factors can suppress apoptosis.                                                                                             |
| BAX    | BCL2-associated X protein                                           | This protein forms a heterodimer with BCL2, and functions as an apoptotic activator.                                                                                                                                                         |
| BRAF   | v-raf murine sarcoma viral oncogene homolog B1                      | This protein plays a role in regulating the MAP kinase/ERKs signaling pathway, which affects cell division, differentiation, and secretion.                                                                                                  |
| BSG    | basigin (Ok blood group)                                            | This protein is a plasma membrane protein that is important in spermatogenesis, embryo implantation, neural network formation, and tumor progression.                                                                                        |
| CCL4   | chemokine (C-C motif) ligand 4                                      |                                                                                                                                                                                                                                              |
| CD44   | CD44 molecule (Indian blood group)                                  | This protein participates in a wide variety of cellular functions including lymphocyte activation, recirculation and homing, hematopoiesis, and tumor metastasis.                                                                            |
| CD58   | CD58 molecule                                                       | This protein functions in adhesion and activation of T lymphocytes.                                                                                                                                                                          |
| CD81   | CD81 molecule                                                       | This protein appears to promote muscle cell fusion and support myotube maintenance, and may be involved in signal transduction.                                                                                                              |
| CD83   | CD83 molecule                                                       |                                                                                                                                                                                                                                              |
| CDKN1A | cyclin-dependent kinase inhibitor 1A (p21, Cip1)                    | This protein functions as a regulator of cell cycle progression at G1. It also plays a regulatory role in S phase DNA replication and DNA damage repair, and may be instrumental in the execution of apoptosis following caspase activation. |
| CDKN2A | cyclin-dependent kinase inhibitor 2A (melanoma, p16, inhibits CDK4) | This ARF product functions as a stabilizer of the tumor suppressor protein p53 as it can interact with, and sequester, MDM1, a protein responsible for the degradation of p53. It has a common functionality in cell cycle G1 control.       |

|         |                                                                                          |                                                                                                                                                                                                                                                                                                                                              |
|---------|------------------------------------------------------------------------------------------|----------------------------------------------------------------------------------------------------------------------------------------------------------------------------------------------------------------------------------------------------------------------------------------------------------------------------------------------|
| CDKN2B  | cyclin-dependent kinase inhibitor 2B (p15, inhibits CDK4)                                | This cyclin-dependent kinase functions as a cell growth regulator that controls cell cycle G1 progression.                                                                                                                                                                                                                                   |
| CEACAM1 | carcinoembryonic antigen-related cell adhesion molecule 1 (biliary glycoprotein)         | Multiple cellular activities have been attributed to this protein, including roles in the differentiation and arrangement of tissue three-dimensional structure, angiogenesis, apoptosis, tumor suppression, metastasis, and the modulation of innate and adaptive immune responses.                                                         |
| CEBPB   | CCAAT/enhancer binding protein (C/EBP), beta                                             | This protein is important in the regulation of genes involved in immune and inflammatory responses. It can also bind the promoter and upstream element and stimulate the expression of the collagen type I gene.                                                                                                                             |
| CFLAR   | CASP8 and FADD-like apoptosis regulator                                                  |                                                                                                                                                                                                                                                                                                                                              |
| CXCR4   | chemokine (C-X-C motif) receptor 4                                                       | This protein acts with the CD4 protein to support HIV entry into cells and is also highly expressed in breast cancer cells.                                                                                                                                                                                                                  |
| CYLD    | cyldromatosis (turban tumor syndrome)                                                    | This protein functions as a deubiquitinating enzyme.                                                                                                                                                                                                                                                                                         |
| DICER1  | dicer 1, ribonuclease type III                                                           | This ribonuclease is required by the RNA interference and small temporal RNA pathways to produce the active small RNA component that represses gene expression.                                                                                                                                                                              |
| DLG1    | discs, large homolog 1 (Drosophila)                                                      |                                                                                                                                                                                                                                                                                                                                              |
| DUSP10  | dual specificity phosphatase 10                                                          | This protein binds to and inactivates p38 and SAPK/JNK, but not MAPK/ERK. It is widely expressed in various tissues and organs, and its expression is elevated by stress stimuli.                                                                                                                                                            |
| EGR1    | early growth response 1                                                                  | This protein is a transcriptional regulator required for differentiation and mitogenesis.                                                                                                                                                                                                                                                    |
| EIF2AK2 | eukaryotic translation initiation factor 2-alpha kinase 2                                |                                                                                                                                                                                                                                                                                                                                              |
| FADD    | Fas (TNFRSF6)-associated via death domain                                                | The protein encoded by this gene is an adaptor molecule that interacts with various cell surface receptors and mediates cell apoptotic signals.                                                                                                                                                                                              |
| FAS     | Fas (TNF receptor superfamily, member 6)                                                 | This protein has been shown to play a central role in the physiological regulation of programmed cell death, and has been implicated in the pathogenesis of various malignancies and diseases of the immune system. This receptor is found to be involved in transducing the proliferating signals in normal diploid fibroblast and T cells. |
| FUS     | fusion (involved in t(12;16) in malignant liposarcoma)                                   |                                                                                                                                                                                                                                                                                                                                              |
| GABPB2  | GA binding protein transcription factor, beta subunit 2                                  |                                                                                                                                                                                                                                                                                                                                              |
| GCNT1   | glucosaminyl (N-acetyl) transferase 1, core 2 (beta-1,6-N-acetylglucosaminyltransferase) | This protein is essential to the formation of Gal beta 1-3(GlcNAc beta 1-6)GalNAc structures and the core 2 O-glycan branch.                                                                                                                                                                                                                 |

|           |                                                                    |                                                                                                                                                                                                                                                               |
|-----------|--------------------------------------------------------------------|---------------------------------------------------------------------------------------------------------------------------------------------------------------------------------------------------------------------------------------------------------------|
| HLA-E     | major histocompatibility complex, class I, E                       | HLA-E belongs to the HLA class I heavy chain paralogues. HLA-E binds a restricted subset of peptides derived from the leader peptides of other class I molecules.                                                                                             |
| HNRNPA2B1 | heterogeneous nuclear ribonucleoprotein A2/B1                      | These proteins are associated with pre-mRNAs in the nucleus and appear to influence pre-mRNA processing and other aspects of mRNA metabolism and transport.                                                                                                   |
| HRH1      | histamine receptor H1                                              | This protein mediates the contraction of smooth muscles, the increase in capillary permeability due to contraction of terminal venules, the release of catecholamine from adrenal medulla, and neurotransmission in the central nervous system.               |
| HSP90B1   | heat shock protein 90kDa beta (Grp94), member 1                    | HSP90 proteins play roles in folding newly synthesized proteins or stabilizing and refolding denatured proteins after stress.                                                                                                                                 |
| HSPD1     | heat shock 60kDa protein 1 (chaperonin)                            | This protein may function as a signaling molecule in the innate immune system. It is essential for the folding and assembly of newly imported proteins in the mitochondria.                                                                                   |
| ICAM1     | intercellular adhesion molecule 1                                  | This gene encodes a cell surface glycoprotein which is typically expressed on endothelial cells and cells of the immune system.                                                                                                                               |
| ICOSLG    | inducible T-cell co-stimulator ligand                              |                                                                                                                                                                                                                                                               |
| IFNAR1    | interferon (alpha, beta and omega) receptor 1                      | Binding and activation of this receptor stimulates Janus protein kinases, it also functions as an antiviral factor.                                                                                                                                           |
| IFNGR1    | interferon gamma receptor 1                                        | This gene encodes the ligand-binding chain (alpha) of the gamma interferon receptor.                                                                                                                                                                          |
| IKZF2     | IKAROS family zinc finger 2 (Helios)                               | This protein is thought to function predominantly in early hematopoietic development.                                                                                                                                                                         |
| IL2RG     | interleukin 2 receptor, gamma (severe combined immunodeficiency)   | The interleukin 2 (IL2) receptor gamma chain (IL2RG), an important signalling component of many interleukin receptors (IL2,IL4,IL7,IL9, and IL15).                                                                                                            |
| IL4R      | interleukin 4 receptor                                             | This protein can bind interleukin 4 to promote differentiation of Th2 cells, can be produced by an alternate splice variant or by proteolysis of the membrane-bound protein, and can inhibit IL4-mediated cell proliferation and IL5 upregulation by T-cells. |
| IL7R      | interleukin 7 receptor                                             | This protein has been shown to play a critical role in the V(D)J recombination during lymphocyte development, and to control the accessibility of the TCR gamma locus by STAT5 and histone acetylation.                                                       |
| IMPDH1    | IMP (inosine monophosphate) dehydrogenase 1                        | The protein encoded by this gene acts as a homotetramer to regulate cell growth. The encoded protein is an enzyme that catalyzes the synthesis of xanthine monophosphate (XMP) from inosine-5'-monophosphate (IMP).                                           |
| ISG20     | interferon stimulated exonuclease gene 20kDa                       |                                                                                                                                                                                                                                                               |
| ISG15     | ISG15 ubiquitin-like modifier                                      | G1P2 is a ubiquitin-like protein that becomes conjugated to many cellular proteins upon activation by interferon-alpha (IFNA; MIM 147660) and -beta (IFNB; MIM 147640).                                                                                       |
| ITGAM     | integrin, alpha M (complement component 3 receptor 3 subunit)      | The alpha M beta 2 integrin is important in the adherence of neutrophils and monocytes to stimulated endothelium, and also in the phagocytosis of complement coated particles.                                                                                |
| ITGB2     | integrin, beta 2 (complement component 3 receptor 3 and 4 subunit) | Integrins are known to participate in cell adhesion as well as cell-surface mediated signalling.                                                                                                                                                              |

|         |                                                                      |                                                                                                                                                                                                                                                                                                                                |
|---------|----------------------------------------------------------------------|--------------------------------------------------------------------------------------------------------------------------------------------------------------------------------------------------------------------------------------------------------------------------------------------------------------------------------|
| KLF2    | Kruppel-like factor 2 (lung)                                         |                                                                                                                                                                                                                                                                                                                                |
| KLF4    | Kruppel-like factor 4 (gut)                                          |                                                                                                                                                                                                                                                                                                                                |
| LGALS1  | lectin, galactoside-binding, soluble, 1                              | This protein may act as an autocrine negative growth factor that regulates cell proliferation.                                                                                                                                                                                                                                 |
| LYN     | v-yes-1 Yamaguchi sarcoma viral related oncogene homolog             |                                                                                                                                                                                                                                                                                                                                |
| MAP2K7  | mitogen-activated protein kinase kinase 7                            | This kinase is involved in the signal transduction mediating the cell responses to proinflammatory cytokines, and environmental stresses.                                                                                                                                                                                      |
| MAP3K2  | mitogen-activated protein kinase kinase kinase 2                     | This kinase preferentially activates other kinases involved in the MAP kinase signaling pathway. It phosphorylates and activates I kappa B kinases, and so plays a role in NF-kappa B signaling pathway. It also activates protein kinase C-related kinase 2, which suggests its involvement in a regulated signaling process. |
| MAP3K7  | mitogen-activated protein kinase kinase kinase 7                     | This kinase mediates the signaling transduction induced by TGF beta and morphogenetic protein (BMP), and controls a variety of cell functions including transcription regulation and apoptosis. This kinase can play a role in the cell response to environmental stresses.                                                    |
| MDM2    | Mdm2 p53 binding protein homolog (mouse)                             | This protein is a nuclear phosphoprotein that binds and inhibits transactivation by tumor protein p53, as part of an autoregulatory negative feedback loop. It also affects the cell cycle, apoptosis, and tumorigenesis through interactions with other proteins, including retinoblastoma 1 and ribosomal protein L5.        |
| MVP     | major vault protein                                                  | This protein mediates drug resistance, perhaps via a transport process.                                                                                                                                                                                                                                                        |
| NFKB1   | nuclear factor of kappa light polypeptide gene enhancer in B-cells 1 | NFKB is a transcription regulator that is activated by various intra- and extra-cellular stimuli such as cytokines, oxidant-free radicals, ultraviolet irradiation, and bacterial or viral products.                                                                                                                           |
| NOTCH3  | Notch homolog 3 (Drosophila)                                         | Notch interaction with its cell-bound ligands (delta, serrate) establishes an intercellular signalling pathway that plays a key role in neural development.                                                                                                                                                                    |
| NP      | nucleoside phosphorylase                                             | This protein is an enzyme which reversibly catalyzes the phosphorolysis of purine nucleosides.                                                                                                                                                                                                                                 |
| PIK3AP1 | phosphoinositide-3-kinase adaptor protein 1                          |                                                                                                                                                                                                                                                                                                                                |
| PIK3R1  | phosphoinositide-3-kinase, regulatory subunit 1 (alpha)              | Phosphatidylinositol 3-kinase plays an important role in the metabolic actions of insulin.                                                                                                                                                                                                                                     |
| PRKCQ   | protein kinase C, theta                                              | This protein is one of the PKC family members important for T-cell activation, and may link the T cell receptor (TCR) signaling complex to the activation of the transcription factors.                                                                                                                                        |
| PRKCZ   | protein kinase C, zeta                                               | Protein kinase C (PKC) zeta is a member of the PKC family which are involved in a variety of cellular processes such as proliferation, differentiation and secretion.                                                                                                                                                          |
| PTPN2   | protein tyrosine phosphatase, non-receptor type 2                    | This protein regulates a variety of cellular processes including cell growth, differentiation, mitotic cycle, and oncogenic transformation.                                                                                                                                                                                    |
| PTPN6   | protein tyrosine phosphatase, non-receptor type 6                    | This protein is expressed primarily in hematopoietic cells, and functions as an important regulator of multiple signaling pathways in hematopoietic cells. It dephosphorylates a wide spectrum of phospho-proteins involved in hematopoietic cell signaling.                                                                   |

|          |                                                                                                                  |                                                                                                                                                                                                                                                                                                                                                    |
|----------|------------------------------------------------------------------------------------------------------------------|----------------------------------------------------------------------------------------------------------------------------------------------------------------------------------------------------------------------------------------------------------------------------------------------------------------------------------------------------|
| PTPRJ    | protein tyrosine phosphatase, receptor type, J                                                                   | This protein, present in all hematopoietic lineages, was shown to negatively regulate T cell receptor signaling possibly through interfering with the phosphorylation of Phospholipase C Gamma 1 and Linker for Activation of T Cells. It also dephosphorylates the PDGF beta receptor, and may be involved in UV-induced signal transduction.     |
| RBL2     | retinoblastoma-like 2 (p130)                                                                                     |                                                                                                                                                                                                                                                                                                                                                    |
| RGS2     | regulator of G-protein signaling 2, 24kDa                                                                        |                                                                                                                                                                                                                                                                                                                                                    |
| RIPK2    | receptor-interacting serine-threonine kinase 2                                                                   | This protein is a component of signaling complexes in both the innate and adaptive immune pathways, and is a potent activator of NF-kappaB and inducer of apoptosis in response to various stimuli.                                                                                                                                                |
| SCGB1A1  | secretoglobin, family 1A, member 1 (uteroglobin)                                                                 |                                                                                                                                                                                                                                                                                                                                                    |
| SEMA4D   | sema domain, immunoglobulin domain (Ig), transmembrane domain (TM) and short cytoplasmic domain, (semaphorin) 4D |                                                                                                                                                                                                                                                                                                                                                    |
| SERPINA1 | serpin peptidase inhibitor, clade A (alpha-1 antiproteinase, antitrypsin), member 1                              | This protein is a serine protease inhibitor whose targets include elastase, plasmin, thrombin, trypsin, chymotrypsin, and plasminogen activator.                                                                                                                                                                                                   |
| SHC1     | SHC (Src homology 2 domain containing) transforming protein 1                                                    |                                                                                                                                                                                                                                                                                                                                                    |
| SPP1     | secreted phosphoprotein 1                                                                                        |                                                                                                                                                                                                                                                                                                                                                    |
| STAM2    | signal transducing adaptor molecule (SH3 domain and ITAM motif) 2                                                | This protein is thought to exhibit compensatory effects on the signaling pathway downstream of JAK kinases upon cytokine stimulation.                                                                                                                                                                                                              |
| STAT1    | signal transducer and activator of transcription 1, 91kDa                                                        | This protein mediates the expression of a variety of genes, which is thought to be important for cell viability in response to different cell stimuli and pathogens.                                                                                                                                                                               |
| STAT3    | signal transducer and activator of transcription 3 (acute-phase response factor)                                 | This protein mediates the expression of a variety of genes in response to cell stimuli, and thus plays a key role in many cellular processes such as cell growth and apoptosis.                                                                                                                                                                    |
| STAT6    | signal transducer and activator of transcription 6, interleukin-4 induced                                        | This protein plays a central role in exerting IL4 mediated biological responses. It is found to induce the expression of BCL2L1/BCL-X(L), which is responsible for the anti-apoptotic activity of IL4. It also plays a role in differentiation of T helper 2 (Th2) cells, expression of cell surface markers, and class switch of immunoglobulins. |
| STAT5B   | signal transducer and activator of transcription 5B                                                              | This protein mediates the signal transduction triggered by various cell ligands, such as IL2, IL4, CSF1, and different growth hormones. It is involved in TCR signaling, apoptosis, adult mammary gland development, and sexual dimorphism of liver gene expression.                                                                               |

|          |                                                                                                        |                                                                                                                                                                                                                                     |
|----------|--------------------------------------------------------------------------------------------------------|-------------------------------------------------------------------------------------------------------------------------------------------------------------------------------------------------------------------------------------|
| STK17B   | serine/threonine kinase 17b                                                                            |                                                                                                                                                                                                                                     |
| SYK      | spleen tyrosine kinase                                                                                 |                                                                                                                                                                                                                                     |
| TGFBR2   | transforming growth factor, beta receptor II (70/80kDa)                                                | This receptor regulates the transcription of a subset of genes related to cell proliferation.                                                                                                                                       |
| THBS1    | thrombospondin 1                                                                                       | This protein is an adhesive glycoprotein that mediates cell-to-cell and cell-to-matrix interactions. It plays roles in platelet aggregation, angiogenesis, and tumorigenesis.                                                       |
| TLR2     | toll-like receptor 2                                                                                   | This protein encoded by this gene is a member of the Toll-like receptor (TLR) family which plays a fundamental role in pathogen recognition and activation of innate immunity. It mediates host response to Gram-positive bacteria. |
| TP53     | tumor protein p53                                                                                      | This gene encodes tumor protein p53, which responds to diverse cellular stresses to regulate target genes that induce cell cycle arrest, apoptosis, senescence, DNA repair, or changes in metabolism.                               |
| TP53INP1 | tumor protein p53 inducible nuclear protein 1                                                          |                                                                                                                                                                                                                                     |
| TSC22D3  | TSC22 domain family, member 3                                                                          | The protein is a leucine zipper protein, that function as a transcriptional regulator. It appears to play a key role in the anti-inflammatory and immunosuppressive effects of this steroid and chemokine.                          |
| TXN      | thioredoxin                                                                                            | Thioredoxin is a 12-kD oxidoreductase enzyme containing a dithiol-disulfide active site.                                                                                                                                            |
| TYK2     | tyrosine kinase 2                                                                                      | This protein associates with cytokine receptors and promulgate cytokine signals by phosphorylating receptor subunits. It may play a role in anti-viral immunity.                                                                    |
| UBE2N    | ubiquitin-conjugating enzyme E2N (UBC13 homolog, yeast)                                                | The modification of proteins with ubiquitin is an important cellular mechanism for targeting abnormal or short-lived proteins for degradation.                                                                                      |
| USF1     | upstream transcription factor 1                                                                        | This protein can activate transcription through pyrimidine-rich initiator (Inr) elements and E-box motifs.                                                                                                                          |
| XRCC5    | X-ray repair complementing defective repair in Chinese hamster cells 5 (double-strand-break rejoining) | This gene functionally complements Chinese hamster xrs-6, a mutant defective in DNA double-strand break repair and in ability to undergo V(D)J recombination.                                                                       |

Hematological System Development and Function: Activation: Activation of Leukocyte Cell Lines (1.02E-03)

|        |                        |                                                                                                                                                                                                                            |
|--------|------------------------|----------------------------------------------------------------------------------------------------------------------------------------------------------------------------------------------------------------------------|
| B2M    | beta-2-microglobulin   | Beta-2-microglobulin is a serum protein found in association with the major histocompatibility complex (MHC) class I heavy chain on the surface of nearly all nucleated cells.                                             |
| CD300A | CD300a molecule        | The CMRF35 antigen (CMRF35A; MIM 606786), which was identified by reactivity with a monoclonal antibody, is present on monocytes, neutrophils, and some T and B lymphocytes.                                               |
| CFL1   | cofilin 1 (non-muscle) | Cofilin binds and depolymerizes filamentous F-actin and inhibits the polymerization of monomeric G-actin in a pH-dependent manner. It is involved in the translocation of actin-cofilin complex from cytoplasm to nucleus. |

|         |                                                 |                                                                                                                                                                                                                                     |
|---------|-------------------------------------------------|-------------------------------------------------------------------------------------------------------------------------------------------------------------------------------------------------------------------------------------|
| HLA-A   | major histocompatibility complex, class I, A    | Class I molecules play a central role in the immune system by presenting peptides derived from the endoplasmic reticulum lumen. They are expressed in nearly all cells.                                                             |
| HLA-C   | major histocompatibility complex, class I, C    | Class I molecules play a central role in the immune system by presenting peptides derived from endoplasmic reticulum lumen. They are expressed in nearly all cells.                                                                 |
| HSP90B1 | heat shock protein 90kDa beta (Grp94), member 1 | HSP90 proteins play roles in folding newly synthesized proteins or stabilizing and refolding denatured proteins after stress.                                                                                                       |
| IL6R    | interleukin 6 receptor                          | Interleukin 6 (IL6) is a potent pleiotropic cytokine that regulates cell growth and differentiation and plays an important role in immune response.                                                                                 |
| LGALS3  | lectin, galactoside-binding, soluble, 3         |                                                                                                                                                                                                                                     |
| TLR2    | toll-like receptor 2                            | This protein encoded by this gene is a member of the Toll-like receptor (TLR) family which plays a fundamental role in pathogen recognition and activation of innate immunity. It mediates host response to Gram-positive bacteria. |

Hematological System

Development and Function: Cell Spreading: Cell Spreading of Neutrophils (2.05E-03)

|       |                                                                    |                                                                                                                                                                                                                                                                                                                                                                                                                                                |
|-------|--------------------------------------------------------------------|------------------------------------------------------------------------------------------------------------------------------------------------------------------------------------------------------------------------------------------------------------------------------------------------------------------------------------------------------------------------------------------------------------------------------------------------|
| FCAR  | Fc fragment of IgA, receptor for                                   | This receptor is a transmembrane glycoprotein present on the surface of myeloid lineage cells such as neutrophils, monocytes, macrophages, and eosinophils, where it mediates immunologic responses to pathogens. It interacts with IgA-opsinized targets and triggers several immunologic defense processes, including phagocytosis, antibody-dependent cell-mediated cytotoxicity, and stimulation of the release of inflammatory mediators. |
| IL8   | interleukin 8                                                      | This chemokine, one of the major mediators of the inflammatory response, functions as a chemoattractant, and is also a potent angiogenic factor.                                                                                                                                                                                                                                                                                               |
| ITGAM | integrin, alpha M (complement component 3 receptor 3 subunit)      | The alpha M beta 2 integrin is important in the adherence of neutrophils and monocytes to stimulated endothelium, and also in the phagocytosis of complement coated particles.                                                                                                                                                                                                                                                                 |
| ITGB2 | integrin, beta 2 (complement component 3 receptor 3 and 4 subunit) | Integrins are known to participate in cell adhesion as well as cell-surface mediated signalling.                                                                                                                                                                                                                                                                                                                                               |
| LYN   | v-yes-1 Yamaguchi sarcoma viral related oncogene homolog           |                                                                                                                                                                                                                                                                                                                                                                                                                                                |
| SYK   | spleen tyrosine kinase                                             |                                                                                                                                                                                                                                                                                                                                                                                                                                                |

Hematological System

Development and Function: Recruitment: Recruitment of Macrophages (2.34E-03)

|         |                                                                   |                                                                                                                                               |
|---------|-------------------------------------------------------------------|-----------------------------------------------------------------------------------------------------------------------------------------------|
| B4GALT1 | UDP-Gal:betaGlcNAc beta 1,4- galactosyltransferase, polypeptide 1 | This gene is unique among the beta4GalT genes because it encodes an enzyme that participates both in glycoconjugate and lactose biosynthesis. |
| C5AR1   | complement component 5a receptor 1                                |                                                                                                                                               |

|        |                                                                    |                                                                                                                                                                                                                                                                                                                                                       |
|--------|--------------------------------------------------------------------|-------------------------------------------------------------------------------------------------------------------------------------------------------------------------------------------------------------------------------------------------------------------------------------------------------------------------------------------------------|
| CCL3   | chemokine (C-C motif) ligand 3                                     | Macrophage inflammatory protein-1 is a so-called monokine that is involved in the acute inflammatory state in the recruitment and activation of polymorphonuclear leukocytes.                                                                                                                                                                         |
| CCL4   | chemokine (C-C motif) ligand 4                                     |                                                                                                                                                                                                                                                                                                                                                       |
| CD44   | CD44 molecule (Indian blood group)                                 | This protein participates in a wide variety of cellular functions including lymphocyte activation, recirculation and homing, hematopoiesis, and tumor metastasis.                                                                                                                                                                                     |
| HMGB1  | high-mobility group box 1                                          |                                                                                                                                                                                                                                                                                                                                                       |
| ICAM1  | intercellular adhesion molecule 1                                  | This gene encodes a cell surface glycoprotein which is typically expressed on endothelial cells and cells of the immune system.                                                                                                                                                                                                                       |
| IL8    | interleukin 8                                                      | This chemokine, one of the major mediators of the inflammatory response, functions as a chemoattractant, and is also a potent angiogenic factor.                                                                                                                                                                                                      |
| ITGB2  | integrin, beta 2 (complement component 3 receptor 3 and 4 subunit) | Integrins are known to participate in cell adhesion as well as cell-surface mediated signalling.                                                                                                                                                                                                                                                      |
| LSP1   | lymphocyte-specific protein 1                                      | The protein may regulate neutrophil motility, adhesion to fibrinogen matrix proteins, and transendothelial migration.                                                                                                                                                                                                                                 |
| NFE2L2 | nuclear factor (erythroid-derived 2)-like 2                        | NFE2 (MIM 601490), NFE2L1 (MIM 163260), and NFE2L2 comprise a family of human genes encoding basic leucine zipper (bZIP) transcription factors. They share highly conserved regions that are distinct from other bZIP families, such as JUN (MIM 165160) and FOS (MIM 164810), although remaining regions have diverged considerably from each other. |
| THBS1  | thrombospondin 1                                                   | This protein is an adhesive glycoprotein that mediates cell-to-cell and cell-to-matrix interactions. It plays roles in platelet aggregation, angiogenesis, and tumorigenesis.                                                                                                                                                                         |
| TLR2   | toll-like receptor 2                                               | This protein encoded by this gene is a member of the Toll-like receptor (TLR) family which plays a fundamental role in pathogen recognition and activation of innate immunity. It mediates host response to Gram-positive bacteria.                                                                                                                   |
| UCP2   | uncoupling protein 2 (mitochondrial, proton carrier)               | This gene is expressed in many tissues, with the greatest expression in skeletal muscle. It is thought to play a role in nonshivering thermogenesis, obesity and diabetes.                                                                                                                                                                            |

Connective Tissue Development and Function: Proliferation of Fibroblast Cell Lines (4.38E-08)

|        |                                               |                                                                                                                                                  |
|--------|-----------------------------------------------|--------------------------------------------------------------------------------------------------------------------------------------------------|
| AHR    | aryl hydrocarbon receptor                     | This protein regulates biological responses to planar aromatic hydrocarbons and xenobiotic-metabolizing enzymes such as cytochrome P450.         |
| AKT1   | v-akt murine thymoma viral oncogene homolog 1 | In the developing nervous system AKT is a critical mediator of growth factor-induced neuronal survival. Survival factors can suppress apoptosis. |
| ARID5B | AT rich interactive domain 5B (MRF1-like)     |                                                                                                                                                  |

|          |                                                                                    |                                                                                                                                                                                                                                                        |
|----------|------------------------------------------------------------------------------------|--------------------------------------------------------------------------------------------------------------------------------------------------------------------------------------------------------------------------------------------------------|
| ATIC     | 5-aminoimidazole-4-carboxamide ribonucleotide formyltransferase/IMP cyclohydrolase |                                                                                                                                                                                                                                                        |
| BAX      | BCL2-associated X protein                                                          | This protein forms a heterodimer with BCL2, and functions as an apoptotic activator.                                                                                                                                                                   |
| BTG1     | B-cell translocation gene 1, anti-proliferative                                    | Expression of this gene is highest in the G0/G1 phases of the cell cycle and downregulated when cells progressed through G1. The encoded protein interacts with several nuclear receptors, and functions as a coactivator of cell differentiation.     |
| BTG3     | BTG family, member 3                                                               | This protein might play a role in neurogenesis in the central nervous system.                                                                                                                                                                          |
| BTRC     | beta-transducin repeat containing                                                  | This protein associates specifically with phosphorylated I $\kappa$ B $\alpha$ and beta-catenin destruction motifs, functioning in multiple transcriptional programs by activating the NF- $\kappa$ B pathway and inhibiting the beta-catenin pathway. |
| CAPRIN1  | cell cycle associated protein 1                                                    |                                                                                                                                                                                                                                                        |
| CCND1    | cyclin D1                                                                          | This cyclin is required for cell cycle G1/S transition. It interacts with tumor suppressor protein Rb and the expression of this gene is regulated positively by Rb.                                                                                   |
| CD81     | CD81 molecule                                                                      | This protein appears to promote muscle cell fusion and support myotube maintenance, and may be involved in signal transduction.                                                                                                                        |
| CDKN1A   | cyclin-dependent kinase inhibitor 1A (p21, Cip1)                                   | This protein functions as a regulator of cell cycle progression at G1. It also plays a regulatory role in S phase DNA replication and DNA damage repair, and may be instrumental in the execution of apoptosis following caspase activation.           |
| CDKN2A   | cyclin-dependent kinase inhibitor 2A (melanoma, p16, inhibits CDK4)                | This ARF product functions as a stabilizer of the tumor suppressor protein p53 as it can interact with, and sequester, MDM1, a protein responsible for the degradation of p53. It has a common functionality in cell cycle G1 control.                 |
| CDKN2B   | cyclin-dependent kinase inhibitor 2B (p15, inhibits CDK4)                          | This cyclin-dependent kinase functions as a cell growth regulator that controls cell cycle G1 progression.                                                                                                                                             |
| CEBPB    | CCAAT/enhancer binding protein (C/EBP), beta                                       | This protein is important in the regulation of genes involved in immune and inflammatory responses. It can also bind the promoter and upstream element and stimulate the expression of the collagen type I gene.                                       |
| CRK      | v-crk sarcoma virus CT10 oncogene homolog (avian)                                  | This protein is involved in several signaling pathways, recruiting cytoplasmic proteins in the vicinity of tyrosine kinase through SH2-phosphotyrosine interaction.                                                                                    |
| DICER1   | dicer 1, ribonuclease type III                                                     | This ribonuclease is required by the RNA interference and small temporal RNA pathways to produce the active small RNA component that represses gene expression.                                                                                        |
| EBNA1BP2 | EBNA1 binding protein 2                                                            |                                                                                                                                                                                                                                                        |
| EIF2AK1  | eukaryotic translation initiation factor 2-alpha kinase 1                          | The protein encoded by this gene acts at the level of translation initiation to downregulate protein synthesis in response to stress.                                                                                                                  |

|          |                                                                                                                |                                                                                                                                                                                                                                                                                                                         |
|----------|----------------------------------------------------------------------------------------------------------------|-------------------------------------------------------------------------------------------------------------------------------------------------------------------------------------------------------------------------------------------------------------------------------------------------------------------------|
| ERBB2    | v-erb-b2 erythroblastic leukemia viral oncogene homolog 2, neuro/glioblastoma derived oncogene homolog (avian) | This protein binds to other ligand-bound EGF receptor family members to form a heterodimer, stabilizing ligand binding and enhancing kinase-mediated activation of downstream signalling pathways, such as those involving mitogen-activated protein kinase and phosphatidylinositol-3 kinase.                          |
| ETV6     | ets variant 6                                                                                                  | This gene encodes an ETS family transcription factor that it is required for hematopoiesis and maintenance of the developing vascular network.                                                                                                                                                                          |
| HDGF     | hepatoma-derived growth factor (high-mobility group protein 1-like)                                            | This protein has mitogenic and DNA-binding activity and may play a role in cellular proliferation and differentiation.                                                                                                                                                                                                  |
| HMGB1    | high-mobility group box 1                                                                                      |                                                                                                                                                                                                                                                                                                                         |
| IFI16    | interferon, gamma-inducible protein 16                                                                         | This protein is involved in DNA binding, transcriptional regulation, and protein-protein interactions. It modulates p53 function, and inhibits cell growth in the Ras/Raf signaling pathway.                                                                                                                            |
| IGF2     | insulin-like growth factor 2 (somatomedin A)                                                                   | This gene encodes a member of the insulin family of polypeptide growth factors that is involved in development and growth.                                                                                                                                                                                              |
| JUN      | jun oncogene                                                                                                   | This protein interacts directly with specific target DNA sequences to regulate gene expression.                                                                                                                                                                                                                         |
| KLF2     | Kruppel-like factor 2 (lung)                                                                                   |                                                                                                                                                                                                                                                                                                                         |
| KLF5     | Kruppel-like factor 5 (intestinal)                                                                             | Since this protein localizes to the nucleus and binds the epidermal growth factor response element, it is thought to be a transcription factor.                                                                                                                                                                         |
| KLF6     | Kruppel-like factor 6                                                                                          | This zinc finger protein is a transcriptional activator, and functions as a tumor suppressor.                                                                                                                                                                                                                           |
| MAP2K7   | mitogen-activated protein kinase 7                                                                             | This kinase is involved in the signal transduction mediating the cell responses to proinflammatory cytokines, and environmental stresses.                                                                                                                                                                               |
| MAPK14   | mitogen-activated protein kinase 14                                                                            | This kinase may be involved in stress related transcription and cell cycle regulation, as well as in genotoxic stress response.                                                                                                                                                                                         |
| MAPKAPK2 | mitogen-activated protein kinase-activated protein kinase 2                                                    | This kinase is known to be involved in many cellular processes including stress and inflammatory responses, nuclear export, gene expression regulation and cell proliferation.                                                                                                                                          |
| MDM2     | Mdm2 p53 binding protein homolog (mouse)                                                                       | This protein is a nuclear phosphoprotein that binds and inhibits transactivation by tumor protein p53, as part of an autoregulatory negative feedback loop. It also affects the cell cycle, apoptosis, and tumorigenesis through interactions with other proteins, including retinoblastoma 1 and ribosomal protein L5. |
| MDM4     | Mdm4 p53 binding protein homolog (mouse)                                                                       | This protein plays a role in apoptosis.                                                                                                                                                                                                                                                                                 |
| NPM1     | nucleophosmin (nucleolar phosphoprotein B23, numatrin)                                                         | NPM1 is implicated in multiple functions, including ribosomal protein assembly and transport, control of centrosome duplication, and regulation of the tumor suppressor ARF (MIM 600160).                                                                                                                               |
| PDGFA    | platelet-derived growth factor alpha polypeptide                                                               | The four members of this family are mitogenic factors for cells of mesenchymal origin.                                                                                                                                                                                                                                  |
| PIAS1    | protein inhibitor of activated STAT, 1                                                                         | This protein functions in testis as a nuclear receptor transcriptional coregulator and may have a role in AR initiation and maintenance of spermatogenesis.                                                                                                                                                             |

|         |                                                                                  |                                                                                                                                                                                                                                                                              |
|---------|----------------------------------------------------------------------------------|------------------------------------------------------------------------------------------------------------------------------------------------------------------------------------------------------------------------------------------------------------------------------|
| PLSCR1  | phospholipid scramblase 1                                                        |                                                                                                                                                                                                                                                                              |
| PTMA    | prothymosin, alpha                                                               |                                                                                                                                                                                                                                                                              |
| PTPN2   | protein tyrosine phosphatase, non-receptor type 2                                | This protein regulates a variety of cellular processes including cell growth, differentiation, mitotic cycle, and oncogenic transformation.                                                                                                                                  |
| RBL2    | retinoblastoma-like 2 (p130)                                                     |                                                                                                                                                                                                                                                                              |
| RIPK1   | receptor (TNFRSF)-interacting serine-threonine kinase 1                          |                                                                                                                                                                                                                                                                              |
| SOS1    | son of sevenless homolog 1 (Drosophila)                                          | This protein may regulate RAS proteins by facilitating the exchange of GTP for GDP.                                                                                                                                                                                          |
| STAT3   | signal transducer and activator of transcription 3 (acute-phase response factor) | This protein mediates the expression of a variety of genes in response to cell stimuli, and thus plays a key role in many cellular processes such as cell growth and apoptosis.                                                                                              |
| TFG     | TRK-fused gene                                                                   |                                                                                                                                                                                                                                                                              |
| TOB1    | transducer of ERBB2, 1                                                           | This protein inhibits T cell proliferation and transcription of cytokines and cyclins. It interacts with mothers against decapentaplegic Drosophila homolog 2 and 4 to enhance their DNA binding activity. This interaction inhibits interleukin 2 transcription in T cells. |
| TP53    | tumor protein p53                                                                | This gene encodes tumor protein p53, which responds to diverse cellular stresses to regulate target genes that induce cell cycle arrest, apoptosis, senescence, DNA repair, or changes in metabolism.                                                                        |
| TPM3    | tropomyosin 3                                                                    | This member of the tropomyosin family of actin-binding proteins is involved in the contractile system of striated and smooth muscles and the cytoskeleton of non-muscle cells.                                                                                               |
| TPR     | translocated promoter region (to activated MET oncogene)                         | The protein directly interacts with several components of the Nuclear Pore Complex. It is required for the nuclear export of mRNAs and some proteins.                                                                                                                        |
| TSC1    | tuberous sclerosis 1                                                             |                                                                                                                                                                                                                                                                              |
| TSC2    | tuberous sclerosis 2                                                             | This protein is a tumor suppressor and is able to stimulate specific GTPases.                                                                                                                                                                                                |
| TSC22D3 | TSC22 domain family, member 3                                                    | The protein is a leucine zipper protein, that function as a transcriptional regulator. It appears to play a key role in the anti-inflammatory and immunosuppressive effects of this steroid and chemokine.                                                                   |
| TXNIP   | thioredoxin interacting protein                                                  |                                                                                                                                                                                                                                                                              |
| ZBED1   | zinc finger, BED-type containing 1                                               |                                                                                                                                                                                                                                                                              |

---

Connective  
Tissue  
Development  
and Function:  
Proliferation:  
Proliferation of  
Fibroblasts  
(2.54E-06)

|        |                                                                                                    |                                                                                                                                                                                                                                                                                                                                              |
|--------|----------------------------------------------------------------------------------------------------|----------------------------------------------------------------------------------------------------------------------------------------------------------------------------------------------------------------------------------------------------------------------------------------------------------------------------------------------|
| AHR    | aryl hydrocarbon receptor                                                                          | This protein regulates biological responses to planar aromatic hydrocarbons and xenobiotic-metabolizing enzymes such as cytochrome P450.                                                                                                                                                                                                     |
| AIF1   | allograft inflammatory factor 1                                                                    | This protein is involved in negative regulation of growth of vascular smooth muscle cells, which contributes to the anti-inflammatory response to vessel wall trauma.                                                                                                                                                                        |
| AKT1   | v-akt murine thymoma viral oncogene homolog 1                                                      | In the developing nervous system AKT is a critical mediator of growth factor-induced neuronal survival. Survival factors can suppress apoptosis.                                                                                                                                                                                             |
| ATF4   | activating transcription factor 4 (tax-responsive enhancer element B67)                            | This transcription factor was isolated and characterized as the cAMP-response element binding protein 2 (CREB-2).                                                                                                                                                                                                                            |
| BAX    | BCL2-associated X protein                                                                          | This protein forms a heterodimer with BCL2, and functions as an apoptotic activator.                                                                                                                                                                                                                                                         |
| CCND1  | cyclin D1                                                                                          | This cyclin is required for cell cycle G1/S transition. It interacts with tumor suppressor protein Rb and the expression of this gene is regulated positively by Rb.                                                                                                                                                                         |
| CD44   | CD44 molecule (Indian blood group)                                                                 | This protein participates in a wide variety of cellular functions including lymphocyte activation, recirculation and homing, hematopoiesis, and tumor metastasis.                                                                                                                                                                            |
| CDKN1A | cyclin-dependent kinase inhibitor 1A (p21, Cip1)                                                   | This protein functions as a regulator of cell cycle progression at G1. It also plays a regulatory role in S phase DNA replication and DNA damage repair, and may be instrumental in the execution of apoptosis following caspase activation.                                                                                                 |
| CDKN2A | cyclin-dependent kinase inhibitor 2A (melanoma, p16, inhibits CDK4)                                | This ARF product functions as a stabilizer of the tumor suppressor protein p53 as it can interact with, and sequester, MDM1, a protein responsible for the degradation of p53. It has a common functionality in cell cycle G1 control.                                                                                                       |
| CDKN2B | cyclin-dependent kinase inhibitor 2B (p15, inhibits CDK4)                                          | This cyclin-dependent kinase functions as a cell growth regulator that controls cell cycle G1 progression.                                                                                                                                                                                                                                   |
| CEBPB  | CCAAT/enhancer binding protein (C/EBP), beta                                                       | This protein is important in the regulation of genes involved in immune and inflammatory responses. It can also bind the promoter and upstream element and stimulate the expression of the collagen type I gene.                                                                                                                             |
| EDN1   | endothelin 1                                                                                       |                                                                                                                                                                                                                                                                                                                                              |
| EGFR   | epidermal growth factor receptor (erythroblastic leukemia viral (v-erb-b) oncogene homolog, avian) | Binding of this receptor to a ligand induces dimerization and tyrosine autophosphorylation and leads to cell proliferation.                                                                                                                                                                                                                  |
| FAS    | Fas (TNF receptor superfamily, member 6)                                                           | This protein has been shown to play a central role in the physiological regulation of programmed cell death, and has been implicated in the pathogenesis of various malignancies and diseases of the immune system. This receptor is found to be involved in transducing the proliferating signals in normal diploid fibroblast and T cells. |
| FBRS   | fibrosin                                                                                           | Fibrosin is a lymphokine secreted by activated lymphocytes that induces fibroblast proliferation.                                                                                                                                                                                                                                            |

|         |                                                      |                                                                                                                                                                                                                                                                                                                                                   |
|---------|------------------------------------------------------|---------------------------------------------------------------------------------------------------------------------------------------------------------------------------------------------------------------------------------------------------------------------------------------------------------------------------------------------------|
| FOS     | v-fos FBJ murine osteosarcoma viral oncogene homolog | The FOS proteins have been implicated as regulators of cell proliferation, differentiation, transformation, and apoptotic cell death.                                                                                                                                                                                                             |
| FOSL2   | FOS-like antigen 2                                   | The FOS proteins have been implicated as regulators of cell proliferation, differentiation, and transformation.                                                                                                                                                                                                                                   |
| GRB2    | growth factor receptor-bound protein 2               | The protein may be involved in the signal transduction pathway.                                                                                                                                                                                                                                                                                   |
| GRN     | granulin                                             | Different members of the granulin protein family may act as inhibitors, stimulators, or have dual actions on cell growth. Granulin family members are important in normal development, wound healing, and tumorigenesis.                                                                                                                          |
| GSTP1   | glutathione S-transferase pi 1                       | This GST family member functions in xenobiotic metabolism and play a role in susceptibility to cancer, and other diseases.                                                                                                                                                                                                                        |
| IFNAR1  | interferon (alpha, beta and omega) receptor 1        | Binding and activation of this receptor stimulates Janus protein kinases, it also functions as an antiviral factor.                                                                                                                                                                                                                               |
| IGF2    | insulin-like growth factor 2 (somatomedin A)         | This gene encodes a member of the insulin family of polypeptide growth factors that is involved in development and growth.                                                                                                                                                                                                                        |
| ILK     | integrin-linked kinase                               | Integrin-linked kinase (ILK), interacts with the cytoplasmic domain of beta-1 integrin in order to influence intracellular and extracellular functions.                                                                                                                                                                                           |
| JUN     | jun oncogene                                         | This protein interacts directly with specific target DNA sequences to regulate gene expression.                                                                                                                                                                                                                                                   |
| MAPK14  | mitogen-activated protein kinase 14                  | This kinase may be involved in stress related transcription and cell cycle regulation, as well as in genotoxic stress response.                                                                                                                                                                                                                   |
| MDM2    | Mdm2 p53 binding protein homolog (mouse)             | This protein is a nuclear phosphoprotein that binds and inhibits transactivation by tumor protein p53, as part of an autoregulatory negative feedback loop. It also affects the cell cycle, apoptosis, and tumorigenesis through interactions with other proteins, including retinoblastoma 1 and ribosomal protein L5.                           |
| MDM4    | Mdm4 p53 binding protein homolog (mouse)             | This protein plays a role in apoptosis.                                                                                                                                                                                                                                                                                                           |
| MORF4L1 | mortality factor 4 like 1                            |                                                                                                                                                                                                                                                                                                                                                   |
| NCSTN   | nicastrin                                            | This protein cleaves integral membrane proteins, including Notch receptors and beta-amyloid precursor protein, and may be a stabilizing cofactor required for gamma-secretase complex assembly.                                                                                                                                                   |
| PA2G4   | proliferation-associated 2G4, 38kDa                  | This gene encodes an RNA-binding protein that is involved in growth regulation, ribosome assembly, and the regulation of intermediate and late steps of rRNA processing. It is also a transcriptional co-repressor of androgen receptor-regulated genes and other cell cycle regulatory genes through its interactions with histone deacetylases. |
| PDGFA   | platelet-derived growth factor alpha polypeptide     | The four members of this family are mitogenic factors for cells of mesenchymal origin.                                                                                                                                                                                                                                                            |
| PITPNA  | phosphatidylinositol transfer protein, alpha         | Phosphatidylinositol transfer protein is a member of a diverse set of cytosolic phospholipid transfer proteins that are distinguished by their ability to transfer phospholipids between membranes in vitro.                                                                                                                                      |
| PML     | promyelocytic leukemia                               | This phosphoprotein localizes to nuclear bodies where it functions as a transcription factor and tumor suppressor. Its expression is cell-cycle related and it regulates the p53 response to oncogenic signals.                                                                                                                                   |
| PTPN2   | protein tyrosine phosphatase, non-receptor type 2    | This protein regulates a variety of cellular processes including cell growth, differentiation, mitotic cycle, and oncogenic transformation.                                                                                                                                                                                                       |
| SYCE1   | synaptonemal complex central element protein 1       |                                                                                                                                                                                                                                                                                                                                                   |
| SKIL    | SKI-like oncogene                                    |                                                                                                                                                                                                                                                                                                                                                   |

|        |                                                           |                                                                                                                                                                                                       |
|--------|-----------------------------------------------------------|-------------------------------------------------------------------------------------------------------------------------------------------------------------------------------------------------------|
| STAT1  | signal transducer and activator of transcription 1, 91kDa | This protein mediates the expression of a variety of genes, which is thought to be important for cell viability in response to different cell stimuli and pathogens.                                  |
| TGFBR2 | transforming growth factor, beta receptor II (70/80kDa)   | This receptor regulates the transcription of a subset of genes related to cell proliferation.                                                                                                         |
| TP53   | tumor protein p53                                         | This gene encodes tumor protein p53, which responds to diverse cellular stresses to regulate target genes that induce cell cycle arrest, apoptosis, senescence, DNA repair, or changes in metabolism. |
| TXNIP  | thioredoxin interacting protein                           |                                                                                                                                                                                                       |
| VCAN   | versican                                                  |                                                                                                                                                                                                       |
| WASF2  | WAS protein family, member 2                              | This multiprotein complex serves to transduce signals that involve changes in cell shape, motility or function.                                                                                       |

Connective Tissue

Development and Function: Growth of Fibroblast Cell Lines (3.79E-06)

|         |                                                                                  |                                                                                                                                                                                                                                                                                      |
|---------|----------------------------------------------------------------------------------|--------------------------------------------------------------------------------------------------------------------------------------------------------------------------------------------------------------------------------------------------------------------------------------|
| ACP1    | acid phosphatase 1, soluble                                                      | This protein functions as an acid phosphatase and a protein tyrosine phosphatase by hydrolyzing protein tyrosine phosphate to protein tyrosine and orthophosphate. It also hydrolyzes orthophosphoric monoesters to alcohol and orthophosphate.                                      |
| AHR     | aryl hydrocarbon receptor                                                        | This protein regulates biological responses to planar aromatic hydrocarbons and xenobiotic-metabolizing enzymes such as cytochrome P450.                                                                                                                                             |
| ANP32A  | acidic (leucine-rich) nuclear phosphoprotein 32 family, member A                 |                                                                                                                                                                                                                                                                                      |
| CCND1   | cyclin D1                                                                        | This cyclin is required for cell cycle G1/S transition. It interacts with tumor suppressor protein Rb and the expression of this gene is regulated positively by Rb.                                                                                                                 |
| CDKN1A  | cyclin-dependent kinase inhibitor 1A (p21, Cip1)                                 | This protein functions as a regulator of cell cycle progression at G1. It also plays a regulatory role in S phase DNA replication and DNA damage repair, and may be instrumental in the execution of apoptosis following caspase activation.                                         |
| CDKN2A  | cyclin-dependent kinase inhibitor 2A (melanoma, p16, inhibits CDK4)              | This ARF product functions as a stabilizer of the tumor suppressor protein p53 as it can interact with, and sequester, MDM1, a protein responsible for the degradation of p53. It has a common functionality in cell cycle G1 control.                                               |
| CDKN2B  | cyclin-dependent kinase inhibitor 2B (p15, inhibits CDK4)                        | This cyclin-dependent kinase functions as a cell growth regulator that controls cell cycle G1 progression.                                                                                                                                                                           |
| CEACAM1 | carcinoembryonic antigen-related cell adhesion molecule 1 (biliary glycoprotein) | Multiple cellular activities have been attributed to this protein, including roles in the differentiation and arrangement of tissue three-dimensional structure, angiogenesis, apoptosis, tumor suppression, metastasis, and the modulation of innate and adaptive immune responses. |

|         |                                                                                                                |                                                                                                                                                                                                                                                                                                |
|---------|----------------------------------------------------------------------------------------------------------------|------------------------------------------------------------------------------------------------------------------------------------------------------------------------------------------------------------------------------------------------------------------------------------------------|
| CEBPB   | CCAAT/enhancer binding protein (C/EBP), beta                                                                   | This protein is important in the regulation of genes involved in immune and inflammatory responses. It can also bind the promoter and upstream element and stimulate the expression of the collagen type I gene.                                                                               |
| CNOT6L  | CCR4-NOT transcription complex, subunit 6-like                                                                 |                                                                                                                                                                                                                                                                                                |
| CRK     | v-crk sarcoma virus CT10 oncogene homolog (avian)                                                              | This protein is involved in several signaling pathways, recruiting cytoplasmic proteins in the vicinity of tyrosine kinase through SH2-phosphotyrosine interaction.                                                                                                                            |
| DDX3X   | DEAD (Asp-Glu-Ala-Asp) box polypeptide 3, X-linked                                                             | DEAD box proteins are implicated in a number of cellular processes involving alteration of RNA secondary structure such as translation initiation, nuclear and mitochondrial splicing, and ribosome and spliceosome assembly.                                                                  |
| EGFR    | epidermal growth factor receptor (erythroblastic leukemia viral (v-erb-b) oncogene homolog, avian)             | Binding of this receptor to a ligand induces dimerization and tyrosine autophosphorylation and leads to cell proliferation.                                                                                                                                                                    |
| EIF2AK2 | eukaryotic translation initiation factor 2-alpha kinase 2                                                      |                                                                                                                                                                                                                                                                                                |
| ERBB2   | v-erb-b2 erythroblastic leukemia viral oncogene homolog 2, neuro/glioblastoma derived oncogene homolog (avian) | This protein binds to other ligand-bound EGF receptor family members to form a heterodimer, stabilizing ligand binding and enhancing kinase-mediated activation of downstream signalling pathways, such as those involving mitogen-activated protein kinase and phosphatidylinositol-3 kinase. |
| ERBB3   | v-erb-b2 erythroblastic leukemia viral oncogene homolog 3 (avian)                                              | This protein has a neuregulin binding domain but not an active kinase domain. Heterodimerization with other EGF family members leads to the activation of pathways which leads to cell proliferation or differentiation.                                                                       |
| ETV6    | ets variant 6                                                                                                  | This gene encodes an ETS family transcription factor that it is required for hematopoiesis and maintenance of the developing vascular network.                                                                                                                                                 |
| FOS     | v-fos FBJ murine osteosarcoma viral oncogene homolog                                                           | The FOS proteins have been implicated as regulators of cell proliferation, differentiation, transformation, and apoptotic cell death.                                                                                                                                                          |
| GBP2    | guanylate binding protein 2, interferon-inducible                                                              | Interferons are cytokines that have antiviral effects and inhibit tumor cell proliferation, by inducing a large number of genes in their target cells.                                                                                                                                         |
| GRN     | granulin                                                                                                       | Different members of the granulin protein family may act as inhibitors, stimulators, or have dual actions on cell growth. Granulin family members are important in normal development, wound healing, and tumorigenesis.                                                                       |
| INSR    | insulin receptor                                                                                               | Binding of insulin to the insulin receptor (INSR) stimulates glucose uptake.                                                                                                                                                                                                                   |
| IRF1    | interferon regulatory factor 1                                                                                 | IRF1 is a transcription activator of genes induced by interferons alpha, beta, and gamma. It also plays roles in regulating apoptosis and tumor-suppression.                                                                                                                                   |
| IRF2    | interferon regulatory factor 2                                                                                 | IRF2 competitively inhibits the IRF1-mediated transcriptional activation of interferons alpha and beta, and presumably other genes that employ IRF1 for transcription activation. However, IRF2 also functions as a transcriptional activator of histone H4.                                   |

|          |                                                                                                   |                                                                                                                                                                                                                                                                                      |
|----------|---------------------------------------------------------------------------------------------------|--------------------------------------------------------------------------------------------------------------------------------------------------------------------------------------------------------------------------------------------------------------------------------------|
| IVNS1ABP | influenza virus NS1A binding protein                                                              |                                                                                                                                                                                                                                                                                      |
| JUN      | jun oncogene                                                                                      | This protein interacts directly with specific target DNA sequences to regulate gene expression.                                                                                                                                                                                      |
| KHDRBS1  | KH domain containing, RNA binding, signal transduction associated 1                               |                                                                                                                                                                                                                                                                                      |
| LMNA     | lamin A/C                                                                                         | Lamin proteins are thought to be involved in nuclear stability, chromatin structure and gene expression.                                                                                                                                                                             |
| MAP2K7   | mitogen-activated protein kinase kinase 7                                                         | This kinase is involved in the signal transduction mediating the cell responses to proinflammatory cytokines, and environmental stresses.                                                                                                                                            |
| MAX      | MYC associated factor X                                                                           | The homodimers and heterodimers this protein forms compete for a common DNA target site (the E box) and rearrangement among these dimer forms provides a complex system of transcriptional regulation.                                                                               |
| NPM1     | nucleophosmin (nucleolar phosphoprotein B23, numatrin)                                            | NPM1 is implicated in multiple functions, including ribosomal protein assembly and transport, control of centrosome duplication, and regulation of the tumor suppressor ARF (MIM 600160).                                                                                            |
| PLAGL2   | pleiomorphic adenoma gene-like 2                                                                  | Pleiomorphic adenoma gene-like 2 is a zinc-finger protein that recognizes DNA and/or RNA.                                                                                                                                                                                            |
| PLAUR    | plasminogen activator, urokinase receptor                                                         | This receptor for urokinase plasminogen activator has a role in localizing and promoting plasmin formation, and likely influences many normal and pathological processes related to cell-surface plasminogen activation and localized degradation of the extracellular matrix.       |
| PML      | promyelocytic leukemia                                                                            | This phosphoprotein localizes to nuclear bodies where it functions as a transcription factor and tumor suppressor. Its expression is cell-cycle related and it regulates the p53 response to oncogenic signals.                                                                      |
| PPP1R15A | protein phosphatase 1, regulatory (inhibitor) subunit 15A                                         | This gene is a member of a group of genes whose transcript levels are increased following stressful growth arrest conditions and treatment with DNA-damaging agents.                                                                                                                 |
| PRKCE    | protein kinase C, epsilon                                                                         | This kinase is involved in neuron channel activation, apoptosis, cardioprotection from ischemia, heat shock response, and insulin exocytosis. It may also be important for LPS-mediated signaling in activated macrophages and may play a role in controlling anxiety-like behavior. |
| PTMA     | prothymosin, alpha                                                                                |                                                                                                                                                                                                                                                                                      |
| RASSF1   | Ras association (RalGDS/AF-6) domain family member 1                                              | This protein was shown to inhibit the accumulation of cyclin D1, and thus induce cell cycle arrest.                                                                                                                                                                                  |
| SKIL     | SKI-like oncogene                                                                                 |                                                                                                                                                                                                                                                                                      |
| SMARCA2  | SWI/SNF related, matrix associated, actin dependent regulator of chromatin, subfamily a, member 2 | This protein is part of the large ATP-dependent chromatin remodeling complex SNF/SWI, which is required for transcriptional activation of genes normally repressed by chromatin.                                                                                                     |
| SMC3     | structural maintenance of chromosomes 3                                                           | This protein is a component of the multimeric cohesin complex that holds together sister chromatids during mitosis, enabling proper chromosome segregation.                                                                                                                          |
| SOS1     | son of sevenless homolog 1 (Drosophila)                                                           | This protein may regulate RAS proteins by facilitating the exchange of GTP for GDP.                                                                                                                                                                                                  |

|       |                                                                                  |                                                                                                                                                                                                       |
|-------|----------------------------------------------------------------------------------|-------------------------------------------------------------------------------------------------------------------------------------------------------------------------------------------------------|
| SS18  | synovial sarcoma translocation, chromosome 18                                    |                                                                                                                                                                                                       |
| STAT3 | signal transducer and activator of transcription 3 (acute-phase response factor) | This protein mediates the expression of a variety of genes in response to cell stimuli, and thus plays a key role in many cellular processes such as cell growth and apoptosis.                       |
| STUB1 | STIP1 homology and U-box containing protein 1                                    |                                                                                                                                                                                                       |
| TFE3  | transcription factor binding to IGHM enhancer 3                                  | TFE3 binds to the mu-E3 motif of the immunoglobulin heavy-chain enhancer and is expressed in many cell types.                                                                                         |
| TFRC  | transferrin receptor (p90, CD71)                                                 |                                                                                                                                                                                                       |
| TNK1  | tyrosine kinase, non-receptor, 1                                                 | TNK1 is a nonreceptor tyrosine kinase. These kinases, like members of the SRC (MIM 190090) and JAK (see MIM 147795) families, mediate intracellular signaling downstream of receptor activation.      |
| TP53  | tumor protein p53                                                                | This gene encodes tumor protein p53, which responds to diverse cellular stresses to regulate target genes that induce cell cycle arrest, apoptosis, senescence, DNA repair, or changes in metabolism. |
| TSC2  | tuberous sclerosis 2                                                             | This protein is a tumor suppressor and is able to stimulate specific GTPases.                                                                                                                         |

Connective Tissue  
Development and Function: Growth: Growth of Fibroblasts (1.31E-04)

|        |                                                                                                    |                                                                                                                                                                                                                                                                                                                                   |
|--------|----------------------------------------------------------------------------------------------------|-----------------------------------------------------------------------------------------------------------------------------------------------------------------------------------------------------------------------------------------------------------------------------------------------------------------------------------|
| ATF3   | activating transcription factor 3                                                                  | The longer isoform represses rather than activates transcription from promoters with ATF binding elements. The shorter isoform (deltaZip2) lacks the leucine zipper protein-dimerization motif and does not bind to DNA, and it stimulates transcription presumably by sequestering inhibitory co-factors away from the promoter. |
| CCND1  | cyclin D1                                                                                          | This cyclin is required for cell cycle G1/S transition. It interacts with tumor suppressor protein Rb and the expression of this gene is regulated positively by Rb.                                                                                                                                                              |
| CDKN1A | cyclin-dependent kinase inhibitor 1A (p21, Cip1)                                                   | This protein functions as a regulator of cell cycle progression at G1. It also plays a regulatory role in S phase DNA replication and DNA damage repair, and may be instrumental in the execution of apoptosis following caspase activation.                                                                                      |
| CDKN2A | cyclin-dependent kinase inhibitor 2A (melanoma, p16, inhibits CDK4)                                | This ARF product functions as a stabilizer of the tumor suppressor protein p53 as it can interact with, and sequester, MDM1, a protein responsible for the degradation of p53. It has a common functionality in cell cycle G1 control.                                                                                            |
| DUSP1  | dual specificity phosphatase 1                                                                     | DUSP1 may play an important role in the human cellular response to environmental stress as well as in the negative regulation of cellular proliferation.                                                                                                                                                                          |
| EDN1   | endothelin 1                                                                                       |                                                                                                                                                                                                                                                                                                                                   |
| EGFR   | epidermal growth factor receptor (erythroblastic leukemia viral (v-erb-b) oncogene homolog, avian) | Binding of this receptor to a ligand induces dimerization and tyrosine autophosphorylation and leads to cell proliferation.                                                                                                                                                                                                       |

|         |                                                                                                                |                                                                                                                                                                                                                                                                                                                         |
|---------|----------------------------------------------------------------------------------------------------------------|-------------------------------------------------------------------------------------------------------------------------------------------------------------------------------------------------------------------------------------------------------------------------------------------------------------------------|
| ERBB2   | v-erb-b2 erythroblastic leukemia viral oncogene homolog 2, neuro/glioblastoma derived oncogene homolog (avian) | This protein binds to other ligand-bound EGF receptor family members to form a heterodimer, stabilizing ligand binding and enhancing kinase-mediated activation of downstream signalling pathways, such as those involving mitogen-activated protein kinase and phosphatidylinositol-3 kinase.                          |
| FRS2    | fibroblast growth factor receptor substrate 2                                                                  |                                                                                                                                                                                                                                                                                                                         |
| HMGN1   | high-mobility group nucleosome binding domain 1                                                                | Chromosomal protein HMG14 and its close analog HMG17 alter the interaction between the DNA and the histone octamer, and may be involved in the process that maintains transcribable genes in a unique chromatin conformation.                                                                                           |
| JUN     | jun oncogene                                                                                                   | This protein interacts directly with specific target DNA sequences to regulate gene expression.                                                                                                                                                                                                                         |
| MDM2    | Mdm2 p53 binding protein homolog (mouse)                                                                       | This protein is a nuclear phosphoprotein that binds and inhibits transactivation by tumor protein p53, as part of an autoregulatory negative feedback loop. It also affects the cell cycle, apoptosis, and tumorigenesis through interactions with other proteins, including retinoblastoma 1 and ribosomal protein L5. |
| MDM4    | Mdm4 p53 binding protein homolog (mouse)                                                                       | This protein plays a role in apoptosis.                                                                                                                                                                                                                                                                                 |
| MLL     | myeloid/lymphoid or mixed-lineage leukemia (trithorax homolog, Drosophila)                                     | The MLL gene encodes a DNA-binding protein that methylates histone H3 (see MIM 601128) lys4 (H3K4) and positively regulates expression of target genes, including multiple HOX genes (see MIM 142980).                                                                                                                  |
| NCOA6   | nuclear receptor coactivator 6                                                                                 | This protein is a transcriptional coactivator that can interact with nuclear hormone receptors to enhance their transcriptional activator functions. It is involved in the hormone-dependent coactivation of several receptors. It may also act as a general coactivator.                                               |
| PML     | promyelocytic leukemia                                                                                         | This phosphoprotein localizes to nuclear bodies where it functions as a transcription factor and tumor suppressor. Its expression is cell-cycle related and it regulates the p53 response to oncogenic signals.                                                                                                         |
| PTPN6   | protein tyrosine phosphatase, non-receptor type 6                                                              | This protein is expressed primarily in hematopoietic cells, and functions as an important regulator of multiple signaling pathways in hematopoietic cells. It dephosphorylates a wide spectrum of phospho-proteins involved in hematopoietic cell signaling.                                                            |
| RHOA    | ras homolog gene family, member A                                                                              |                                                                                                                                                                                                                                                                                                                         |
| STARD10 | StAR-related lipid transfer (START) domain containing 10                                                       |                                                                                                                                                                                                                                                                                                                         |
| STAT1   | signal transducer and activator of transcription 1, 91kDa                                                      | This protein mediates the expression of a variety of genes, which is thought to be important for cell viability in response to different cell stimuli and pathogens.                                                                                                                                                    |
| STAT3   | signal transducer and activator of transcription 3 (acute-phase response factor)                               | This protein mediates the expression of a variety of genes in response to cell stimuli, and thus plays a key role in many cellular processes such as cell growth and apoptosis.                                                                                                                                         |
| TACC1   | transforming, acidic coiled-coil containing protein 1                                                          | This locus may represent a breast cancer candidate gene.                                                                                                                                                                                                                                                                |

|                                                                                                              |        |                                                                                                                |                                                                                                                                                                                                                                                                                                |
|--------------------------------------------------------------------------------------------------------------|--------|----------------------------------------------------------------------------------------------------------------|------------------------------------------------------------------------------------------------------------------------------------------------------------------------------------------------------------------------------------------------------------------------------------------------|
|                                                                                                              | TP53   | tumor protein p53                                                                                              | This gene encodes tumor protein p53, which responds to diverse cellular stresses to regulate target genes that induce cell cycle arrest, apoptosis, senescence, DNA repair, or changes in metabolism.                                                                                          |
|                                                                                                              | TPR    | translocated promoter region (to activated MET oncogene)                                                       | The protein directly interacts with several components of the Nuclear Pore Complex. It is required for the nuclear export of mRNAs and some proteins.                                                                                                                                          |
|                                                                                                              | TSC2   | tuberous sclerosis 2                                                                                           | This protein is a tumor suppressor and is able to stimulate specific GTPases.                                                                                                                                                                                                                  |
|                                                                                                              | TXN    | thioredoxin                                                                                                    | Thioredoxin is a 12-kD oxidoreductase enzyme containing a dithiol-disulfide active site.                                                                                                                                                                                                       |
| Connective Tissue Development and Function: G2 Phase: Arrest in G2 Phase of Fibroblast Cell Lines (5.46E-05) | CDKN2A | cyclin-dependent kinase inhibitor 2A (melanoma, p16, inhibits CDK4)                                            | This ARF product functions as a stabilizer of the tumor suppressor protein p53 as it can interact with, and sequester, MDM1, a protein responsible for the degradation of p53. It has a common functionality in cell cycle G1 control.                                                         |
|                                                                                                              | ERBB2  | v-erb-b2 erythroblastic leukemia viral oncogene homolog 2, neuro/glioblastoma derived oncogene homolog (avian) | This protein binds to other ligand-bound EGF receptor family members to form a heterodimer, stabilizing ligand binding and enhancing kinase-mediated activation of downstream signalling pathways, such as those involving mitogen-activated protein kinase and phosphatidylinositol-3 kinase. |
|                                                                                                              | JUN    | jun oncogene                                                                                                   | This protein interacts directly with specific target DNA sequences to regulate gene expression.                                                                                                                                                                                                |
|                                                                                                              | LATS1  | LATS, large tumor suppressor, homolog 1 (Drosophila)                                                           | The protein encoded by this gene is a putative serine/threonine kinase that localizes to the mitotic apparatus and complexes with cell cycle controller CDC2 kinase in early mitosis.                                                                                                          |
|                                                                                                              | MAP2K7 | mitogen-activated protein kinase kinase 7                                                                      | This kinase is involved in the signal transduction mediating the cell responses to proinflammatory cytokines, and environmental stresses.                                                                                                                                                      |
|                                                                                                              | PTPN11 | protein tyrosine phosphatase, non-receptor type 11                                                             | This PTP is widely expressed in most tissues and plays a regulatory role in various cell signaling events that are important for a diversity of cell functions, such as mitogenic activation, metabolic control, transcription regulation, and cell migration.                                 |
|                                                                                                              | PURA   | purine-rich element binding protein A                                                                          | This protein is implicated in the control of both DNA replication and transcription.                                                                                                                                                                                                           |
|                                                                                                              | TP53   | tumor protein p53                                                                                              | This gene encodes tumor protein p53, which responds to diverse cellular stresses to regulate target genes that induce cell cycle arrest, apoptosis, senescence, DNA repair, or changes in metabolism.                                                                                          |

Connective  
Tissue  
Development  
and Function:  
Shape Change:  
Shape Change  
of Fibroblast Cell  
Lines (5.08E-04)

|          |                                                          |                                                                                                                                                                                                                                                                                                                                              |
|----------|----------------------------------------------------------|----------------------------------------------------------------------------------------------------------------------------------------------------------------------------------------------------------------------------------------------------------------------------------------------------------------------------------------------|
| ACP1     | acid phosphatase 1, soluble                              | This protein functions as an acid phosphatase and a protein tyrosine phosphatase by hydrolyzing protein tyrosine phosphate to protein tyrosine and orthophosphate. It also hydrolyzes orthophosphoric monoesters to alcohol and orthophosphate.                                                                                              |
| CD151    | CD151 molecule (Raph blood group)                        | This protein is involved in cell adhesion and may regulate integrin trafficking and/or function. It enhances cell motility, invasion and metastasis of cancer cells.                                                                                                                                                                         |
| CDC42    | cell division cycle 42 (GTP binding protein, 25kDa)      | This protein regulates signaling pathways that control diverse cellular functions including cell morphology, migration, endocytosis and cell cycle progression.                                                                                                                                                                              |
| CDC42SE1 | CDC42 small effector 1                                   |                                                                                                                                                                                                                                                                                                                                              |
| CDC42SE2 | CDC42 small effector 2                                   |                                                                                                                                                                                                                                                                                                                                              |
| FAS      | Fas (TNF receptor superfamily, member 6)                 | This protein has been shown to play a central role in the physiological regulation of programmed cell death, and has been implicated in the pathogenesis of various malignancies and diseases of the immune system. This receptor is found to be involved in transducing the proliferating signals in normal diploid fibroblast and T cells. |
| FGD4     | FYVE, RhoGEF and PH domain containing 4                  | This protein is involved in the regulation of the actin cytoskeleton and cell shape.                                                                                                                                                                                                                                                         |
| GNG12    | guanine nucleotide binding protein (G protein), gamma 12 |                                                                                                                                                                                                                                                                                                                                              |
| INSR     | insulin receptor                                         | Binding of insulin to the insulin receptor (INSR) stimulates glucose uptake.                                                                                                                                                                                                                                                                 |
| LGALS8   | lectin, galactoside-binding, soluble, 8                  | This gene is widely expressed in tumoral tissues and seems to be involved in integrin-like cell interactions.                                                                                                                                                                                                                                |
| MAPK14   | mitogen-activated protein kinase 14                      | This kinase may be involved in stress related transcription and cell cycle regulation, as well as in genotoxic stress response.                                                                                                                                                                                                              |
| PTPN11   | protein tyrosine phosphatase, non-receptor type 11       | This PTP is widely expressed in most tissues and plays a regulatory role in various cell signaling events that are important for a diversity of cell functions, such as mitogenic activation, metabolic control, transcription regulation, and cell migration.                                                                               |
| PTPN12   | protein tyrosine phosphatase, non-receptor type 12       | This PTP may play a role in oncogenesis. It may also have a regulatory role in controlling cell shape and mobility.                                                                                                                                                                                                                          |
| RALBP1   | ralA binding protein 1                                   |                                                                                                                                                                                                                                                                                                                                              |
| RHOA     | ras homolog gene family, member A                        |                                                                                                                                                                                                                                                                                                                                              |
| ROCK1    | Rho-associated, coiled-coil containing protein kinase 1  | This protein serine/threonine kinase that is activated when bound to the GTP-bound form of Rho. This protein, a downstream effector of Rho, phosphorylates and activates LIM kinase, which in turn, phosphorylates cofilin, inhibiting its actin-depolymerizing activity.                                                                    |
| THBS1    | thrombospondin 1                                         | This protein is an adhesive glycoprotein that mediates cell-to-cell and cell-to-matrix interactions. It plays roles in platelet aggregation, angiogenesis, and tumorigenesis.                                                                                                                                                                |

|      |                                          |                                                                                                                                                                                                       |
|------|------------------------------------------|-------------------------------------------------------------------------------------------------------------------------------------------------------------------------------------------------------|
| TP53 | tumor protein p53                        | This gene encodes tumor protein p53, which responds to diverse cellular stresses to regulate target genes that induce cell cycle arrest, apoptosis, senescence, DNA repair, or changes in metabolism. |
| VAV3 | vav 3 guanine nucleotide exchange factor | This protein associates maximally with the nucleotide-free states of these GTPases.                                                                                                                   |

---

Connective Tissue

Development and Function:

G1 Phase: G1 Phase of Fibroblast Cell Lines (1.18E-03) *including* Arrest in G1 Phase of Fibroblast Cell Lines (7.49E-04)

|        |                                                                     |                                                                                                                                                                                                                                              |
|--------|---------------------------------------------------------------------|----------------------------------------------------------------------------------------------------------------------------------------------------------------------------------------------------------------------------------------------|
| AKT1   | v-akt murine thymoma viral oncogene homolog 1                       | In the developing nervous system AKT is a critical mediator of growth factor-induced neuronal survival. Survival factors can suppress apoptosis.                                                                                             |
| CCND1  | cyclin D1                                                           | This cyclin is required for cell cycle G1/S transition. It interacts with tumor suppressor protein Rb and the expression of this gene is regulated positively by Rb.                                                                         |
| CDC42  | cell division cycle 42 (GTP binding protein, 25kDa)                 | This protein regulates signaling pathways that control diverse cellular functions including cell morphology, migration, endocytosis and cell cycle progression.                                                                              |
| CDKN1A | cyclin-dependent kinase inhibitor 1A (p21, Cip1)                    | This protein functions as a regulator of cell cycle progression at G1. It also plays a regulatory role in S phase DNA replication and DNA damage repair, and may be instrumental in the execution of apoptosis following caspase activation. |
| CDKN2A | cyclin-dependent kinase inhibitor 2A (melanoma, p16, inhibits CDK4) | This ARF product functions as a stabilizer of the tumor suppressor protein p53 as it can interact with, and sequester, MDM1, a protein responsible for the degradation of p53. It has a common functionality in cell cycle G1 control.       |
| CDKN2B | cyclin-dependent kinase inhibitor 2B (p15, inhibits CDK4)           | This cyclin-dependent kinase functions as a cell growth regulator that controls cell cycle G1 progression.                                                                                                                                   |
| EP300  | E1A binding protein p300                                            | This protein functions as histone acetyltransferase that regulates transcription via chromatin remodeling and is important in the processes of cell proliferation and differentiation.                                                       |
| EP400  | E1A binding protein p400                                            |                                                                                                                                                                                                                                              |
| LMNA   | lamin A/C                                                           | Lamin proteins are thought to be involved in nuclear stability, chromatin structure and gene expression.                                                                                                                                     |
| MAPK14 | mitogen-activated protein kinase 14                                 | This kinase may be involved in stress related transcription and cell cycle regulation, as well as in genotoxic stress response.                                                                                                              |
| PURA   | purine-rich element binding protein A                               | This protein is implicated in the control of both DNA replication and transcription.                                                                                                                                                         |
| RBL2   | retinoblastoma-like 2 (p130)                                        |                                                                                                                                                                                                                                              |
| TOB2   | transducer of ERBB2, 2                                              | TOB2 is involved in the regulation of cell cycle progression.                                                                                                                                                                                |

|                                                                                                    |          |                                                         |                                                                                                                                                                                                                                                                                                                                              |
|----------------------------------------------------------------------------------------------------|----------|---------------------------------------------------------|----------------------------------------------------------------------------------------------------------------------------------------------------------------------------------------------------------------------------------------------------------------------------------------------------------------------------------------------|
|                                                                                                    | TP53     | tumor protein p53                                       | This gene encodes tumor protein p53, which responds to diverse cellular stresses to regulate target genes that induce cell cycle arrest, apoptosis, senescence, DNA repair, or changes in metabolism.                                                                                                                                        |
| Connective Tissue Development and Function; Ruffling: Ruffling of Fibroblasts (1.25E-03)           | GSN      | gelsolin (amyloidosis, Finnish type)                    | This protein functions in both assembly and disassembly of actin filaments.                                                                                                                                                                                                                                                                  |
|                                                                                                    | TP53     | tumor protein p53                                       | This gene encodes tumor protein p53, which responds to diverse cellular stresses to regulate target genes that induce cell cycle arrest, apoptosis, senescence, DNA repair, or changes in metabolism.                                                                                                                                        |
|                                                                                                    | TSC2     | tuberous sclerosis 2                                    | This protein is a tumor suppressor and is able to stimulate specific GTPases.                                                                                                                                                                                                                                                                |
|                                                                                                    | WASF2    | WAS protein family, member 2                            | This multiprotein complex serves to transduce signals that involve changes in cell shape, motility or function.                                                                                                                                                                                                                              |
| Connective Tissue Development and Function: Blebbing: Blebbing of Fibroblast Cell Lines (1.44E-03) | CDC42SE1 | CDC42 small effector 1                                  |                                                                                                                                                                                                                                                                                                                                              |
|                                                                                                    | CDC42SE2 | CDC42 small effector 2                                  |                                                                                                                                                                                                                                                                                                                                              |
|                                                                                                    | FAS      | Fas (TNF receptor superfamily, member 6)                | This protein has been shown to play a central role in the physiological regulation of programmed cell death, and has been implicated in the pathogenesis of various malignancies and diseases of the immune system. This receptor is found to be involved in transducing the proliferating signals in normal diploid fibroblast and T cells. |
|                                                                                                    | ROCK1    | Rho-associated, coiled-coil containing protein kinase 1 | This protein serine/threonine kinase that is activated when bound to the GTP-bound form of Rho. This protein, a downstream effector of Rho, phosphorylates and activates LIM kinase, which in turn, phosphorylates cofilin, inhibiting its actin-depolymerizing activity.                                                                    |
|                                                                                                    | TP53     | tumor protein p53                                       | This gene encodes tumor protein p53, which responds to diverse cellular stresses to regulate target genes that induce cell cycle arrest, apoptosis, senescence, DNA repair, or changes in metabolism.                                                                                                                                        |

Connective  
Tissue  
Development  
and Function:  
Focus  
Formation:  
Focus Formation  
of Fibroblast Cell  
Lines (1.48E-03)

|        |                                                                                                                |                                                                                                                                                                                                                                                                                                |
|--------|----------------------------------------------------------------------------------------------------------------|------------------------------------------------------------------------------------------------------------------------------------------------------------------------------------------------------------------------------------------------------------------------------------------------|
| CD44   | CD44 molecule (Indian blood group)                                                                             | This protein participates in a wide variety of cellular functions including lymphocyte activation, recirculation and homing, hematopoiesis, and tumor metastasis.                                                                                                                              |
| CDKN2B | cyclin-dependent kinase inhibitor 2B (p15, inhibits CDK4)                                                      | This cyclin-dependent kinase functions as a cell growth regulator that controls cell cycle G1 progression.                                                                                                                                                                                     |
| CEBPB  | CCAAT/enhancer binding protein (C/EBP), beta                                                                   | This protein is important in the regulation of genes involved in immune and inflammatory responses. It can also bind the promoter and upstream element and stimulate the expression of the collagen type I gene.                                                                               |
| EGFR   | epidermal growth factor receptor (erythroblastic leukemia viral (v-erb-b) oncogene homolog, avian)             | Binding of this receptor to a ligand induces dimerization and tyrosine autophosphorylation and leads to cell proliferation.                                                                                                                                                                    |
| ERBB2  | v-erb-b2 erythroblastic leukemia viral oncogene homolog 2, neuro/glioblastoma derived oncogene homolog (avian) | This protein binds to other ligand-bound EGF receptor family members to form a heterodimer, stabilizing ligand binding and enhancing kinase-mediated activation of downstream signalling pathways, such as those involving mitogen-activated protein kinase and phosphatidylinositol-3 kinase. |
| IL8    | interleukin 8                                                                                                  | This chemokine, one of the major mediators of the inflammatory response, functions as a chemoattractant, and is also a potent angiogenic factor.                                                                                                                                               |
| SPP1   | secreted phosphoprotein 1                                                                                      |                                                                                                                                                                                                                                                                                                |
| TACC1  | transforming, acidic coiled-coil containing protein 1                                                          | This locus may represent a breast cancer candidate gene.                                                                                                                                                                                                                                       |
| TP53   | tumor protein p53                                                                                              | This gene encodes tumor protein p53, which responds to diverse cellular stresses to regulate target genes that induce cell cycle arrest, apoptosis, senescence, DNA repair, or changes in metabolism.                                                                                          |

---

Connective  
Tissue  
Development  
and Function:  
Senescence:  
Senescence of  
Fibroblast Cell  
Lines (2.25E-03)

|        |                                                                     |                                                                                                                                                                                                                                              |
|--------|---------------------------------------------------------------------|----------------------------------------------------------------------------------------------------------------------------------------------------------------------------------------------------------------------------------------------|
| BUB3   | budding uninhibited by benzimidazoles 3 homolog (yeast)             | This gene encodes a protein involved in spindle checkpoint function.                                                                                                                                                                         |
| CDKN1A | cyclin-dependent kinase inhibitor 1A (p21, Cip1)                    | This protein functions as a regulator of cell cycle progression at G1. It also plays a regulatory role in S phase DNA replication and DNA damage repair, and may be instrumental in the execution of apoptosis following caspase activation. |
| CDKN2A | cyclin-dependent kinase inhibitor 2A (melanoma, p16, inhibits CDK4) | This ARF product functions as a stabilizer of the tumor suppressor protein p53 as it can interact with, and sequester, MDM1, a protein responsible for the degradation of p53. It has a common functionality in cell cycle G1 control.       |
| CEBPB  | CCAAT/enhancer binding protein (C/EBP), beta                        | This protein is important in the regulation of genes involved in immune and inflammatory responses. It can also bind the promoter and upstream element and stimulate the expression of the collagen type I gene.                             |
| DICER1 | dicer 1, ribonuclease type III                                      | This ribonuclease is required by the RNA interference and small temporal RNA pathways to produce the active small RNA component that represses gene expression.                                                                              |
| DUSP1  | dual specificity phosphatase 1                                      | DUSP1 may play an important role in the human cellular response to environmental stress as well as in the negative regulation of cellular proliferation.                                                                                     |
| EGR1   | early growth response 1                                             | This protein is a transcriptional regulator required for differentiation and mitogenesis.                                                                                                                                                    |
| EP300  | E1A binding protein p300                                            | This protein functions as histone acetyltransferase that regulates transcription via chromatin remodeling and is important in the processes of cell proliferation and differentiation.                                                       |
| MAP2K7 | mitogen-activated protein kinase kinase 7                           | This kinase is involved in the signal transduction mediating the cell responses to proinflammatory cytokines, and environmental stresses.                                                                                                    |
| PSMB5  | proteasome (prosome, macropain) subunit, beta type, 5               | Proteasomes are distributed throughout eukaryotic cells at a high concentration and cleave peptides in an ATP/ubiquitin-dependent process in a non-lysosomal pathway.                                                                        |
| RBL2   | retinoblastoma-like 2 (p130)                                        |                                                                                                                                                                                                                                              |
| TP53   | tumor protein p53                                                   | This gene encodes tumor protein p53, which responds to diverse cellular stresses to regulate target genes that induce cell cycle arrest, apoptosis, senescence, DNA repair, or changes in metabolism.                                        |

---

Connective  
Tissue  
Development  
and Function:  
Contact Growth  
Inhibition:  
Contact Growth  
Inhibition of  
Fibroblast Cell  
Lines (2.31E-03)

|        |                                                                     |                                                                                                                                                                                                                                        |
|--------|---------------------------------------------------------------------|----------------------------------------------------------------------------------------------------------------------------------------------------------------------------------------------------------------------------------------|
| ANP32A | acidic (leucine-rich) nuclear phosphoprotein 32 family, member A    |                                                                                                                                                                                                                                        |
| CDKN2A | cyclin-dependent kinase inhibitor 2A (melanoma, p16, inhibits CDK4) | This ARF product functions as a stabilizer of the tumor suppressor protein p53 as it can interact with, and sequester, MDM1, a protein responsible for the degradation of p53. It has a common functionality in cell cycle G1 control. |
| GBP2   | guanylate binding protein 2, interferon-inducible                   | Interferons are cytokines that have antiviral effects and inhibit tumor cell proliferation, by inducing a large number of genes in their target cells.                                                                                 |
| HAS3   | hyaluronan synthase 3                                               | This protein is involved in the synthesis of the unbranched glycosaminoglycan hyaluronan which is a major constituent of the extracellular matrix.                                                                                     |
| PLAGL2 | pleiomorphic adenoma gene-like 2                                    | Pleiomorphic adenoma gene-like 2 is a zinc-finger protein that recognizes DNA and/or RNA.                                                                                                                                              |
| PTMA   | prothymosin, alpha                                                  |                                                                                                                                                                                                                                        |
| SMC3   | structural maintenance of chromosomes 3                             | This protein is a component of the multimeric cohesin complex that holds together sister chromatids during mitosis, enabling proper chromosome segregation.                                                                            |
| TP53   | tumor protein p53                                                   | This gene encodes tumor protein p53, which responds to diverse cellular stresses to regulate target genes that induce cell cycle arrest, apoptosis, senescence, DNA repair, or changes in metabolism.                                  |

Connective  
Tissue  
Development  
and Function:  
Cytostasis:  
Cytostasis of  
Fibroblasts  
(2.31E-03)

|        |                                                                     |                                                                                                                                                                                                                                        |
|--------|---------------------------------------------------------------------|----------------------------------------------------------------------------------------------------------------------------------------------------------------------------------------------------------------------------------------|
| CASP2  | caspase 2, apoptosis-related cysteine peptidase                     | Sequential activation of caspases plays a central role in the execution-phase of cell apoptosis.                                                                                                                                       |
| CDKN2A | cyclin-dependent kinase inhibitor 2A (melanoma, p16, inhibits CDK4) | This ARF product functions as a stabilizer of the tumor suppressor protein p53 as it can interact with, and sequester, MDM1, a protein responsible for the degradation of p53. It has a common functionality in cell cycle G1 control. |
| HDAC1  | histone deacetylase 1                                               | Histone acetylation and deacetylation, catalyzed by multisubunit complexes, play a key role in the regulation of eukaryotic gene expression and in cell growth and apoptosis.                                                          |
| JUN    | jun oncogene                                                        | This protein interacts directly with specific target DNA sequences to regulate gene expression.                                                                                                                                        |

|        |                                            |                                                                                                                                                                                                       |
|--------|--------------------------------------------|-------------------------------------------------------------------------------------------------------------------------------------------------------------------------------------------------------|
| OAZ1   | ornithine decarboxylase antizyme 1         | The antizyme encoded by this gene inhibits ornithine decarboxylase and accelerates its degradation.                                                                                                   |
| PCYOX1 | prenylcysteine oxidase 1                   | PCYOX1 catalyzes the degradation of prenylcysteine to yield free cysteines and a hydrophobic isoprenoid product.                                                                                      |
| SAT1   | spermidine/spermine N1-acetyltransferase 1 | Spermidine/spermine N(1)-acetyltransferase (SSAT; EC 2.3.1.57) is a rate-limiting enzyme in the catabolic pathway of polyamine metabolism.                                                            |
| TP53   | tumor protein p53                          | This gene encodes tumor protein p53, which responds to diverse cellular stresses to regulate target genes that induce cell cycle arrest, apoptosis, senescence, DNA repair, or changes in metabolism. |

Organismal  
Survival: Death:  
Death of  
Animal(1.36E-  
06), Death of  
Mammalia  
(6.50E-07)

|       |                                                      |                                                                                                                                                                                                                                                                                                   |
|-------|------------------------------------------------------|---------------------------------------------------------------------------------------------------------------------------------------------------------------------------------------------------------------------------------------------------------------------------------------------------|
| ACLY  | ATP citrate lyase                                    | ATP citrate lyase is responsible for the synthesis of cytosolic acetyl-CoA in many tissues. Acetyl-CoA, serves several important biosynthetic pathways, including lipogenesis and cholesterologenesis. In nervous tissue, ATP citrate-lyase may be involved in the biosynthesis of acetylcholine. |
| ADAR  | adenosine deaminase, RNA-specific                    | This gene encodes the enzyme responsible for RNA editing by site-specific deamination of adenosines.                                                                                                                                                                                              |
| AHR   | aryl hydrocarbon receptor                            | This protein regulates biological responses to planar aromatic hydrocarbons and xenobiotic-metabolizing enzymes such as cytochrome P450.                                                                                                                                                          |
| AKT1  | v-akt murine thymoma viral oncogene homolog 1        | In the developing nervous system AKT is a critical mediator of growth factor-induced neuronal survival. Survival factors can suppress apoptosis.                                                                                                                                                  |
| APAF1 | apoptotic peptidase activating factor 1              | This gene encodes a cytoplasmic protein that initiates apoptosis.                                                                                                                                                                                                                                 |
| APLP2 | amyloid beta (A4) precursor-like protein 2           |                                                                                                                                                                                                                                                                                                   |
| ARNT  | aryl hydrocarbon receptor nuclear translocator       | This protein forms a complex with the ligand-bound Ah receptor, and is required for receptor function.                                                                                                                                                                                            |
| ASAH1 | N-acylsphingosine amidohydrolase (acid ceramidase) 1 | This protein catalyzes the synthesis and degradation of ceramide into sphingosine and fatty acid.                                                                                                                                                                                                 |
| ATG7  | ATG7 autophagy related 7 homolog (S. cerevisiae)     | This protein appears to be required for fusion of peroxisomal and vacuolar membranes. It shows homology to the ATP-binding and catalytic sites of the E1 ubiquitin activating enzymes.                                                                                                            |
| ATN1  | atrophin 1                                           | Dentatorubral pallidoluysian atrophy, a rare neurodegenerative disorder characterized by cerebellar ataxia, myoclonic epilepsy, choreoathetosis, and dementia, is related to a trinucleotide repeat within this gene.                                                                             |
| B2M   | beta-2-microglobulin                                 | Beta-2-microglobulin is a serum protein found in association with the major histocompatibility complex (MHC) class I heavy chain on the surface of nearly all nucleated cells.                                                                                                                    |
| BID   | BH3 interacting domain death agonist                 | This gene encodes a death agonist that heterodimerizes with either agonist BAX or antagonist BCL2.                                                                                                                                                                                                |
| BRAF  | v-raf murine sarcoma viral oncogene homolog B1       | This protein plays a role in regulating the MAP kinase/ERKs signaling pathway, which affects cell division, differentiation, and secretion.                                                                                                                                                       |

|        |                                                                     |                                                                                                                                                                                                                                              |
|--------|---------------------------------------------------------------------|----------------------------------------------------------------------------------------------------------------------------------------------------------------------------------------------------------------------------------------------|
| BUB3   | budding uninhibited by benzimidazoles 3 homolog (yeast)             | This gene encodes a protein involved in spindle checkpoint function.                                                                                                                                                                         |
| C5AR1  | complement component 5a receptor 1                                  |                                                                                                                                                                                                                                              |
| CALR   | calreticulin                                                        | Calreticulin is a multifunctional protein that acts as a major Ca(2+)-binding (storage) protein in the lumen of the endoplasmic reticulum. It is also found in the nucleus, suggesting that it may have a role in transcription regulation.  |
| CAPNS1 | calpain, small subunit 1                                            | This gene encodes a small subunit common to both calpain I and II and is associated with myotonic dystrophy.                                                                                                                                 |
| CAPZB  | capping protein (actin filament) muscle Z-line, beta                | This protein regulates growth of the actin filament by capping the barbed end of growing actin filaments.                                                                                                                                    |
| CARM1  | coactivator-associated arginine methyltransferase 1                 | CARM1 is involved in the process of protein arginine methylation which has been implicated in signal transduction, metabolism of nascent pre-RNA, and transcriptional activation.                                                            |
| CCL3   | chemokine (C-C motif) ligand 3                                      | Macrophage inflammatory protein-1 is a so-called monokine that is involved in the acute inflammatory state in the recruitment and activation of polymorphonuclear leukocytes.                                                                |
| CCND1  | cyclin D1                                                           | This cyclin is required for cell cycle G1/S transition. It interacts with tumor suppressor protein Rb and the expression of this gene is regulated positively by Rb.                                                                         |
| CD44   | CD44 molecule (Indian blood group)                                  | This protein participates in a wide variety of cellular functions including lymphocyte activation, recirculation and homing, hematopoiesis, and tumor metastasis.                                                                            |
| CDKN1A | cyclin-dependent kinase inhibitor 1A (p21, Cip1)                    | This protein functions as a regulator of cell cycle progression at G1. It also plays a regulatory role in S phase DNA replication and DNA damage repair, and may be instrumental in the execution of apoptosis following caspase activation. |
| CDKN2A | cyclin-dependent kinase inhibitor 2A (melanoma, p16, inhibits CDK4) | This ARF product functions as a stabilizer of the tumor suppressor protein p53 as it can interact with, and sequester, MDM1, a protein responsible for the degradation of p53. It has a common functionality in cell cycle G1 control.       |
| CEBPB  | CCAAT/enhancer binding protein (C/EBP), beta                        | This protein is important in the regulation of genes involved in immune and inflammatory responses. It can also bind the promoter and upstream element and stimulate the expression of the collagen type I gene.                             |
| CEBPD  | CCAAT/enhancer binding protein (C/EBP), delta                       | This protein is important in the regulation of genes involved in immune and inflammatory responses, and may be involved in the regulation of genes associated with activation and/or differentiation of macrophages.                         |
| CEBPG  | CCAAT/enhancer binding protein (C/EBP), gamma                       | The C/EBP family of transcription factors regulates viral and cellular CCAAT/enhancer element-mediated transcription.                                                                                                                        |
| CFLAR  | CASP8 and FADD-like apoptosis regulator                             |                                                                                                                                                                                                                                              |
| CHUK   | conserved helix-loop-helix ubiquitous kinase                        | This protein phosphorylates sites that trigger the degradation of the inhibitor via the ubiquitination pathway, thereby activating the transcription factor.                                                                                 |
| CLDN1  | claudin 1                                                           | This protein is an integral membrane protein and a component of tight junction strands.                                                                                                                                                      |
| CNP    | 2',3'-cyclic nucleotide 3' phosphodiesterase                        |                                                                                                                                                                                                                                              |
| COL5A1 | collagen, type V, alpha 1                                           | Type V collagen appears to regulate the assembly of heterotypic fibers composed of both type I and type V collagen.                                                                                                                          |

|         |                                                                                                                |                                                                                                                                                                                                                                                                                                |
|---------|----------------------------------------------------------------------------------------------------------------|------------------------------------------------------------------------------------------------------------------------------------------------------------------------------------------------------------------------------------------------------------------------------------------------|
| COX17   | COX17 cytochrome c oxidase assembly homolog (S. cerevisiae)                                                    | Cytochrome c oxidase (COX), the terminal component of the mitochondrial respiratory chain, catalyzes the electron transfer from reduced cytochrome c to oxygen.                                                                                                                                |
| CREB1   | cAMP responsive element binding protein 1                                                                      | This protein induces transcription of genes in response to hormonal stimulation of the cAMP pathway.                                                                                                                                                                                           |
| CREBBP  | CREB binding protein                                                                                           | This protein binds to cAMP-response element binding protein (CREB), and plays critical roles in embryonic development, growth control, and homeostasis by coupling chromatin remodeling to transcription factor recognition.                                                                   |
| CREM    | cAMP responsive element modulator                                                                              | This protein is an important component of cAMP-mediated signal transduction during the spermatogenic cycle, as well as other complex processes.                                                                                                                                                |
| CRK     | v-crk sarcoma virus CT10 oncogene homolog (avian)                                                              | This protein is involved in several signaling pathways, recruiting cytoplasmic proteins in the vicinity of tyrosine kinase through SH2-phosphotyrosine interaction.                                                                                                                            |
| CTSB    | cathepsin B                                                                                                    | This protein is a lysosomal cysteine proteinase, and an amyloid precursor protein secretase involved in the proteolytic processing of amyloid precursor protein (APP).                                                                                                                         |
| CXCR4   | chemokine (C-X-C motif) receptor 4                                                                             | This protein acts with the CD4 protein to support HIV entry into cells and is also highly expressed in breast cancer cells.                                                                                                                                                                    |
| CYBB    | cytochrome b-245, beta polypeptide                                                                             | Cytochrome b (-245) has been proposed as a primary component of the microbicidal oxidase system of phagocytes.                                                                                                                                                                                 |
| DDR1    | discoidin domain receptor tyrosine kinase 1                                                                    | The protein encoded by this gene is a RTK that is widely expressed in normal and transformed epithelial cells and is activated by various types of collagen.                                                                                                                                   |
| DICER1  | dicer 1, ribonuclease type III                                                                                 | This ribonuclease is required by the RNA interference and small temporal RNA pathways to produce the active small RNA component that represses gene expression.                                                                                                                                |
| DUSP1   | dual specificity phosphatase 1                                                                                 | DUSP1 may play an important role in the human cellular response to environmental stress as well as in the negative regulation of cellular proliferation.                                                                                                                                       |
| DYRK1A  | dual-specificity tyrosine-(Y)-phosphorylation regulated kinase 1A                                              | This protein may play a significant role in a signaling pathway regulating cell proliferation and may be involved in brain development.                                                                                                                                                        |
| EIF2AK1 | eukaryotic translation initiation factor 2-alpha kinase 1                                                      | The protein encoded by this gene acts at the level of translation initiation to downregulate protein synthesis in response to stress.                                                                                                                                                          |
| EP300   | E1A binding protein p300                                                                                       | This protein functions as histone acetyltransferase that regulates transcription via chromatin remodeling and is important in the processes of cell proliferation and differentiation.                                                                                                         |
| ERBB2   | v-erb-b2 erythroblastic leukemia viral oncogene homolog 2, neuro/glioblastoma derived oncogene homolog (avian) | This protein binds to other ligand-bound EGF receptor family members to form a heterodimer, stabilizing ligand binding and enhancing kinase-mediated activation of downstream signalling pathways, such as those involving mitogen-activated protein kinase and phosphatidylinositol-3 kinase. |
| ERBB3   | v-erb-b2 erythroblastic leukemia viral oncogene homolog 3 (avian)                                              | This protein has a neuregulin binding domain but not an active kinase domain. Heterodimerization with other EGF family members leads to the activation of pathways which leads to cell proliferation or differentiation.                                                                       |

|          |                                                               |                                                                                                                                                                                                                                                                                                                                              |
|----------|---------------------------------------------------------------|----------------------------------------------------------------------------------------------------------------------------------------------------------------------------------------------------------------------------------------------------------------------------------------------------------------------------------------------|
| ETV6     | ets variant 6                                                 | This gene encodes an ETS family transcription factor that it is required for hematopoiesis and maintenance of the developing vascular network.                                                                                                                                                                                               |
| FADD     | Fas (TNFRSF6)-associated via death domain                     | The protein encoded by this gene is an adaptor molecule that interacts with various cell surface receptors and mediates cell apoptotic signals.                                                                                                                                                                                              |
| FAS      | Fas (TNF receptor superfamily, member 6)                      | This protein has been shown to play a central role in the physiological regulation of programmed cell death, and has been implicated in the pathogenesis of various malignancies and diseases of the immune system. This receptor is found to be involved in transducing the proliferating signals in normal diploid fibroblast and T cells. |
| FDFT1    | farnesyl-diphosphate farnesyltransferase 1                    | This protein is the first specific enzyme in cholesterol biosynthesis, catalyzing the dimerization of two molecules of farnesyl diphosphate in a two-step reaction to form squalene.                                                                                                                                                         |
| FGFR2    | fibroblast growth factor receptor 2                           | The extracellular portion of this protein interacts with fibroblast growth factors, setting in motion a cascade of downstream signals, ultimately influencing mitogenesis and differentiation.                                                                                                                                               |
| FLNB     | filamin B, beta (actin binding protein 278)                   |                                                                                                                                                                                                                                                                                                                                              |
| FOXP1    | forkhead box P1                                               | This protein may act as a tumor suppressor as it is lost in several tumor types.                                                                                                                                                                                                                                                             |
| GLCE     | glucuronic acid epimerase                                     | GLCE is responsible for epimerization of D-glucuronic acid (GlcA) to L-iduronic acid (IdoA) of Heparin Sulfate, which endows the nascent polysaccharide chain with the ability to bind growth factors and cytokines.                                                                                                                         |
| GNAQ     | guanine nucleotide binding protein (G protein), q polypeptide | G-alpha-q is the alpha subunit of one of the heterotrimeric GTP-binding proteins that mediates stimulation of phospholipase C-beta (MIM 600230).                                                                                                                                                                                             |
| GSK3B    | glycogen synthase kinase 3 beta                               | Glycogen synthase kinase-3 (GSK3) is a proline-directed serine-threonine kinase that was initially identified as a phosphorylating and inactivating glycogen synthase.                                                                                                                                                                       |
| HIPK1    | homeodomain interacting protein kinase 1                      | This protein may function as a co-repressor for homeodomain transcription factors.                                                                                                                                                                                                                                                           |
| HIST1H1C | histone cluster 1, H1c                                        | The linker histone, H1, interacts with linker DNA between nucleosomes and functions in the compaction of chromatin into higher order structures. This gene is intronless and encodes a member of the histone H1 family.                                                                                                                      |
| HMGB1    | high-mobility group box 1                                     |                                                                                                                                                                                                                                                                                                                                              |
| HNRNPC   | heterogeneous nuclear ribonucleoprotein C (C1/C2)             | The protein encoded by this gene can act as a tetramer and is involved in the assembly of 40S hnRNP particles.                                                                                                                                                                                                                               |
| HOPX     | HOP homeobox                                                  | This protein may interact with serum response factor (SRF) and modulate SRF-dependent cardiac-specific gene expression and cardiac development.                                                                                                                                                                                              |
| HRH1     | histamine receptor H1                                         | This protein mediates the contraction of smooth muscles, the increase in capillary permeability due to contraction of terminal venules, the release of catecholamine from adrenal medulla, and neurotransmission in the central nervous system.                                                                                              |
| HSP90AB1 | heat shock protein 90kDa alpha (cytosolic), class B member 1  | HSP90 proteins are highly conserved molecular chaperones that have key roles in signal transduction, protein folding, protein degradation, and morphologic evolution.                                                                                                                                                                        |
| IFNAR1   | interferon (alpha, beta and omega) receptor 1                 | Binding and activation of this receptor stimulates Janus protein kinases, it also functions as an antiviral factor.                                                                                                                                                                                                                          |
| IFNGR1   | interferon gamma receptor 1                                   | This gene encodes the ligand-binding chain (alpha) of the gamma interferon receptor.                                                                                                                                                                                                                                                         |

|        |                                                               |                                                                                                                                                                                                                                                                                                                              |
|--------|---------------------------------------------------------------|------------------------------------------------------------------------------------------------------------------------------------------------------------------------------------------------------------------------------------------------------------------------------------------------------------------------------|
| IGF2R  | insulin-like growth factor 2 receptor                         | This receptor functions in the intracellular trafficking of lysosomal enzymes, the activation of transforming growth factor beta, and the degradation of IGF2.                                                                                                                                                               |
| IL18R1 | interleukin 18 receptor 1                                     | This receptor specifically binds interleukin 18 (IL18), and is essential for IL18 mediated signal transduction.                                                                                                                                                                                                              |
| IL6R   | interleukin 6 receptor                                        | Interleukin 6 (IL6) is a potent pleiotropic cytokine that regulates cell growth and differentiation and plays an important role in immune response.                                                                                                                                                                          |
| ILK    | integrin-linked kinase                                        | Integrin-linked kinase (ILK), interacts with the cytoplasmic domain of beta-1 integrin in order to influence intracellular and extracellular functions.                                                                                                                                                                      |
| INSR   | insulin receptor                                              | Binding of insulin to the insulin receptor (INSR) stimulates glucose uptake.                                                                                                                                                                                                                                                 |
| IRF2   | interferon regulatory factor 2                                | IRF2 competitively inhibits the IRF1-mediated transcriptional activation of interferons alpha and beta, and presumably other genes that employ IRF1 for transcription activation. However, IRF2 also functions as a transcriptional activator of histone H4.                                                                 |
| ITGAM  | integrin, alpha M (complement component 3 receptor 3 subunit) | The alpha M beta 2 integrin is important in the adherence of neutrophils and monocytes to stimulated endothelium, and also in the phagocytosis of complement coated particles.                                                                                                                                               |
| ITGB4  | integrin, beta 4                                              | Integrins mediate cell-matrix or cell-cell adhesion, and transduced signals that regulate gene expression and cell growth. This subunit tends to associate with alpha 6 subunit and is likely to play a pivotal role in the biology of invasive carcinoma.                                                                   |
| ITGB8  | integrin, beta 8                                              | Integrin complexes mediate cell-cell and cell-extracellular matrix interactions and this complex plays a role in human airway epithelial proliferation.                                                                                                                                                                      |
| JAK1   | Janus kinase 1                                                | JAK1 is involved in the interferon-alpha/beta and -gamma signal transduction pathways. These kinases couple cytokine ligand binding to tyrosine phosphorylation of various known signaling proteins and of a unique family of transcription factors termed the signal transducers and activators of transcription, or STATs. |
| KEAP1  | kelch-like ECH-associated protein 1                           | This protein interacts with NF-E2-related factor 2 in a redox-sensitive manner and the dissociation of the proteins in the cytoplasm is followed by transportation of NF-E2-related factor 2 to the nucleus.                                                                                                                 |
| KIF5B  | kinesin family member 5B                                      |                                                                                                                                                                                                                                                                                                                              |
| KLF2   | Kruppel-like factor 2 (lung)                                  |                                                                                                                                                                                                                                                                                                                              |
| KRT8   | keratin 8                                                     | This protein plays a role in maintaining cellular structural integrity and also functions in signal transduction and cellular differentiation.                                                                                                                                                                               |
| LDLR   | low density lipoprotein receptor                              | Low density lipoprotein (LDL) is taken into the cell ending up in lysosomes where it is degraded and the cholesterol is made available for repression of microsomal enzyme HMG CoA reductase, the rate-limiting step in cholesterol synthesis.                                                                               |
| LIMS1  | LIM and senescent cell antigen-like domains 1                 | This protein is likely involved in integrin and growth factor receptor kinase signaling pathways. It may play a role in integrin-mediated cell adhesion or spreading.                                                                                                                                                        |
| LPL    | LPL                                                           | LPL is expressed in heart, muscle, and adipose tissue, and has the dual functions of triglyceride hydrolase and ligand/bridging factor for receptor-mediated lipoprotein uptake.                                                                                                                                             |
| LYN    | v-yes-1 Yamaguchi sarcoma viral related oncogene homolog      |                                                                                                                                                                                                                                                                                                                              |
| MACF1  | microtubule-actin crosslinking factor 1                       | This protein may function in microtubule dynamics to facilitate actin-microtubule interactions at the cell periphery and to couple the microtubule network to cellular junctions.                                                                                                                                            |

|          |                                                                  |                                                                                                                                                                                                                                                                                                                         |
|----------|------------------------------------------------------------------|-------------------------------------------------------------------------------------------------------------------------------------------------------------------------------------------------------------------------------------------------------------------------------------------------------------------------|
| MADD     | MAP-kinase activating death domain                               | This protein encoded by this gene is a death domain-containing adaptor protein that interacts with the death domain of TNF-alpha receptor 1 to activate mitogen-activated protein kinase (MAPK) and propagate the apoptotic signal.                                                                                     |
| MAFG     | v-maf musculoaponeurotic fibrosarcoma oncogene homolog G (avian) |                                                                                                                                                                                                                                                                                                                         |
| MAP2K7   | mitogen-activated protein kinase kinase 7                        | This kinase is involved in the signal transduction mediating the cell responses to proinflammatory cytokines, and environmental stresses.                                                                                                                                                                               |
| MAP3K3   | mitogen-activated protein kinase kinase kinase 3                 | This protein directly regulates the stress-activated protein kinase (SAPK) and extracellular signal-regulated protein kinase (ERK) pathways by activating SEK and MEK1/2 respectively.                                                                                                                                  |
| MAP3K7   | mitogen-activated protein kinase kinase kinase 7                 | This kinase mediates the signaling transduction induced by TGF beta and morphogenetic protein (BMP), and controls a variety of cell functions including transcription regulation and apoptosis. This kinase can play a role in the cell response to environmental stresses.                                             |
| MAPK14   | mitogen-activated protein kinase 14                              | This kinase may be involved in stress related transcription and cell cycle regulation, as well as in genotoxic stress response.                                                                                                                                                                                         |
| MAPKAPK5 | mitogen-activated protein kinase-activated protein kinase 5      | In response to cellular stress and proinflammatory cytokines, this kinase is activated through its phosphorylation by MAP kinases.                                                                                                                                                                                      |
| MAX      | MYC associated factor X                                          | The homodimers and heterodimers this protein forms compete for a common DNA target site (the E box) and rearrangement among these dimer forms provides a complex system of transcriptional regulation.                                                                                                                  |
| MBD3     | methyl-CpG binding domain protein 3                              | MBD3 mediates the association of metastasis-associated protein 2 (MTA2) with the core histone deacetylase complex.                                                                                                                                                                                                      |
| MCL1     | myeloid cell leukemia sequence 1 (BCL2-related)                  | The longer gene product (isoform 1) enhances cell survival by inhibiting apoptosis while the alternatively spliced shorter gene product (isoform 2) promotes apoptosis and is death-inducing.                                                                                                                           |
| MDM2     | Mdm2 p53 binding protein homolog (mouse)                         | This protein is a nuclear phosphoprotein that binds and inhibits transactivation by tumor protein p53, as part of an autoregulatory negative feedback loop. It also affects the cell cycle, apoptosis, and tumorigenesis through interactions with other proteins, including retinoblastoma 1 and ribosomal protein L5. |
| MDM4     | Mdm4 p53 binding protein homolog (mouse)                         | This protein plays a role in apoptosis.                                                                                                                                                                                                                                                                                 |
| MED1     | mediator complex subunit 1                                       | The protein encoded by this gene is a subunit of the CRSP (cofactor required for SP1 activation) complex, which, along with TFIID, is required for efficient activation by SP1. It also regulates p53-dependent apoptosis and it is essential for adipogenesis.                                                         |
| MFN1     | mitofusin 1                                                      | This protein is a mediator of mitochondrial fusion, and helps facilitate mitochondrial targeting.                                                                                                                                                                                                                       |
| MFN2     | mitofusin 2                                                      | This protein participates in mitochondrial fusion and contributes to the maintenance and operation of the mitochondrial network. It is involved in the regulation of vascular smooth muscle cell proliferation, and may play a role in the pathophysiology of obesity.                                                  |
| MORF4L1  | mortality factor 4 like 1                                        |                                                                                                                                                                                                                                                                                                                         |
| NBN      | nibrin                                                           | This gene product is thought to be involved in DNA double-strand break repair and DNA damage-induced checkpoint activation.                                                                                                                                                                                             |

|        |                                                                                 |                                                                                                                                                                                                                                                                                                                                                       |
|--------|---------------------------------------------------------------------------------|-------------------------------------------------------------------------------------------------------------------------------------------------------------------------------------------------------------------------------------------------------------------------------------------------------------------------------------------------------|
| NCOA6  | nuclear receptor coactivator 6                                                  | This protein is a transcriptional coactivator that can interact with nuclear hormone receptors to enhance their transcriptional activator functions. It is involved in the hormone-dependent coactivation of several receptors. It may also act as a general coactivator.                                                                             |
| NCSTN  | nicastrin                                                                       | This protein cleaves integral membrane proteins, including Notch receptors and beta-amyloid precursor protein, and may be a stabilizing cofactor required for gamma-secretase complex assembly.                                                                                                                                                       |
| NFE2L2 | nuclear factor (erythroid-derived 2)-like 2                                     | NFE2 (MIM 601490), NFE2L1 (MIM 163260), and NFE2L2 comprise a family of human genes encoding basic leucine zipper (bZIP) transcription factors. They share highly conserved regions that are distinct from other bZIP families, such as JUN (MIM 165160) and FOS (MIM 164810), although remaining regions have diverged considerably from each other. |
| NFIA   | nuclear factor I/A                                                              | Nuclear factor I (NFI) proteins function as cellular transcription factors and as replication factors for adenovirus DNA replication. Diversity in this protein family is generated by multiple genes, differential splicing, and heterodimerization.                                                                                                 |
| NFIC   | nuclear factor I/C (CCAAT-binding transcription factor)                         |                                                                                                                                                                                                                                                                                                                                                       |
| NFKB1  | nuclear factor of kappa light polypeptide gene enhancer in B-cells 1            | NFKB is a transcription regulator that is activated by various intra- and extra-cellular stimuli such as cytokines, oxidant-free radicals, ultraviolet irradiation, and bacterial or viral products.                                                                                                                                                  |
| NFKB2  | nuclear factor of kappa light polypeptide gene enhancer in B-cells 2 (p49/p100) | NFKB has been detected in numerous cell types that express cytokines, chemokines, growth factors, cell adhesion molecules, and some acute phase proteins in health and in various disease states. NFKB is activated by a wide variety of stimuli.                                                                                                     |
| NRP2   | neuropilin 2                                                                    | The encoded transmembrane protein binds to SEMA3C protein and SEMA3F protein, and interacts with vascular endothelial growth factor (VEGF). This protein may play a role in cardiovascular development, axon guidance, and tumorigenesis.                                                                                                             |
| PAK4   | p21 protein (Cdc42/Rac)-activated kinase 4                                      | PAK4 weakly activates the JNK family of MAP kinases, is a mediator of filopodia formation, and may play a role in the reorganization of the actin cytoskeleton.                                                                                                                                                                                       |
| PCMT1  | protein-L-isoaspartate (D-aspartate) O-methyltransferase                        | PCMT1 (EC 2.1.1.77) is a protein repair enzyme that initiates the conversion of abnormal D-aspartyl and L-isoaspartyl residues to the normal L-aspartyl form.                                                                                                                                                                                         |
| PDGFA  | platelet-derived growth factor alpha polypeptide                                | The four members of this family are mitogenic factors for cells of mesenchymal origin.                                                                                                                                                                                                                                                                |
| PDPK1  | 3-phosphoinositide dependent protein kinase-1                                   |                                                                                                                                                                                                                                                                                                                                                       |
| PEA15  | phosphoprotein enriched in astrocytes 15                                        | PEA15 is a death effector domain (DED)-containing protein predominantly expressed in the central nervous system, particularly in astrocytes.                                                                                                                                                                                                          |
| PFN1   | profilin 1                                                                      | The protein encoded by this gene is a ubiquitous actin monomer-binding protein belonging to the profilin family. It is thought to regulate actin polymerization in response to extracellular signals. Deletion of this gene is associated with Miller-Dieker syndrome.                                                                                |
| PIAS2  | protein inhibitor of activated STAT, 2                                          | This gene encodes a protein involved in the regulation of transcription factors involved in MAP kinase signaling.                                                                                                                                                                                                                                     |

|         |                                                                                            |                                                                                                                                                                                                                                                                                                        |
|---------|--------------------------------------------------------------------------------------------|--------------------------------------------------------------------------------------------------------------------------------------------------------------------------------------------------------------------------------------------------------------------------------------------------------|
| PIK3R1  | phosphoinositide-3-kinase, regulatory subunit 1 (alpha)                                    | Phosphatidylinositol 3-kinase plays an important role in the metabolic actions of insulin.                                                                                                                                                                                                             |
| PISD    | phosphatidylserine decarboxylase                                                           | Phosphatidylserine decarboxylases catalyze the formation of phosphatidylethanolamine (PE) by decarboxylation of phosphatidylserine (PS).                                                                                                                                                               |
| PNPLA8  | patatin-like phospholipase domain containing 8                                             | Phospholipase A2 catalyzes cleavage of fatty acids from phospholipids, thereby regulating membrane physical properties and the release of lipid second messengers and growth factors. It modulates cellular growth programs, inflammation, and ion channel function.                                   |
| POU2F1  | POU class 2 homeobox 1                                                                     |                                                                                                                                                                                                                                                                                                        |
| PRKAR1A | protein kinase, cAMP-dependent, regulatory, type I, alpha (tissue specific extinguisher 1) | This protein is a tissue-specific extinguisher that down-regulates the expression of seven liver genes in hepatoma x fibroblast hybrids. It may also have a role in DNA replication via the protein serving as a nuclear transport protein for the second subunit of the Replication Factor C (RFC40). |
| PSEN1   | presenilin 1                                                                               | Presenilins may regulate APP processing through their effects on gamma-secretase. Also, it is thought that they help cleave the Notch receptor, such that they either directly regulate gamma-secretase activity or themselves are protease enzymes.                                                   |
| PSMD4   | proteasome (prosome, macropain) 26S subunit, non-ATPase, 4                                 | Proteasomes are distributed throughout eukaryotic cells at a high concentration and cleave peptides in an ATP/ubiquitin-dependent process in a non-lysosomal pathway.                                                                                                                                  |
| PTPN2   | protein tyrosine phosphatase, non-receptor type 2                                          | This protein regulates a variety of cellular processes including cell growth, differentiation, mitotic cycle, and oncogenic transformation.                                                                                                                                                            |
| PTPN11  | protein tyrosine phosphatase, non-receptor type 11                                         | This PTP is widely expressed in most tissues and plays a regulatory role in various cell signaling events that are important for a diversity of cell functions, such as mitogenic activation, metabolic control, transcription regulation, and cell migration.                                         |
| PTS     | 6-pyruvoyltetrahydropterin synthase                                                        | The enzyme encoded by this gene catalyzes the elimination of inorganic triphosphate from dihydroneopterin triphosphate, which is the second and irreversible step in the biosynthesis of tetrahydrobiopterin from GTP.                                                                                 |
| RBL2    | retinoblastoma-like 2 (p130)                                                               |                                                                                                                                                                                                                                                                                                        |
| REST    | RE1-silencing transcription factor                                                         | This transcriptional repressor which represses neuronal genes in non-neuronal tissues, and it is thought that this repressor may act as a master negative regular of neurogenesis.                                                                                                                     |
| RHOA    | ras homolog gene family, member A                                                          |                                                                                                                                                                                                                                                                                                        |
| RIPK1   | receptor (TNFRSF)-interacting serine-threonine kinase 1                                    |                                                                                                                                                                                                                                                                                                        |
| SIM2    | single-minded homolog 2 (Drosophila)                                                       | The Drosophila sim transcription factor is a master regulator of fruit fly neurogenesis.                                                                                                                                                                                                               |
| SKIL    | SKI-like oncogene                                                                          |                                                                                                                                                                                                                                                                                                        |
| SMAD2   | SMAD family member 2                                                                       | This protein mediates the signal of the transforming growth factor (TGF)-beta, and thus regulates multiple cellular processes, such as cell proliferation, apoptosis, and differentiation.                                                                                                             |

|         |                                                                                                   |                                                                                                                                                                                                                                                                                                                                                    |
|---------|---------------------------------------------------------------------------------------------------|----------------------------------------------------------------------------------------------------------------------------------------------------------------------------------------------------------------------------------------------------------------------------------------------------------------------------------------------------|
| SMARCA5 | SWI/SNF related, matrix associated, actin dependent regulator of chromatin, subfamily a, member 5 | This protein is a component of the chromatin remodeling and spacing factor RSF, a facilitator of the transcription of class II genes by RNA polymerase II.                                                                                                                                                                                         |
| SMN1    | survival of motor neuron 1, telomeric                                                             | Within the nucleus, the protein localizes to subnuclear bodies called gems which are found near coiled bodies containing high concentrations of small ribonucleoproteins (snRNPs). It also interacts with several proteins known to be involved in the biogenesis of snRNPs.                                                                       |
| SOD1    | superoxide dismutase 1, soluble                                                                   | This protein binds copper and zinc ions and is one of two isozymes responsible for destroying free superoxide radicals in the body.                                                                                                                                                                                                                |
| SP1     | Sp1 transcription factor                                                                          |                                                                                                                                                                                                                                                                                                                                                    |
| SPEN    | spen homolog, transcriptional regulator (Drosophila)                                              | This gene encodes a hormone inducible transcriptional repressor.                                                                                                                                                                                                                                                                                   |
| SPRED2  | sprouty-related, EVH1 domain containing 2                                                         | SPRED2 is a member of the Sprouty (see SPRY1; MIM 602465)/SPRED family of proteins that regulate growth factor-induced activation of the MAP kinase cascade (see MAPK1; MIM 176948).                                                                                                                                                               |
| SRF     | serum response factor (c-fos serum response element-binding transcription factor)                 | This protein stimulates both cell proliferation and differentiation. It participates in cell cycle regulation, apoptosis, cell growth, and cell differentiation.                                                                                                                                                                                   |
| STAT1   | signal transducer and activator of transcription 1, 91kDa                                         | This protein mediates the expression of a variety of genes, which is thought to be important for cell viability in response to different cell stimuli and pathogens.                                                                                                                                                                               |
| STAT2   | signal transducer and activator of transcription 2, 113kDa                                        | This protein acts as a transactivator, but lacks the ability to bind DNA directly. It is thought to be involved in the process of blocking IFN-alpha response by adenovirus.                                                                                                                                                                       |
| STAT3   | signal transducer and activator of transcription 3 (acute-phase response factor)                  | This protein mediates the expression of a variety of genes in response to cell stimuli, and thus plays a key role in many cellular processes such as cell growth and apoptosis.                                                                                                                                                                    |
| STAT6   | signal transducer and activator of transcription 6, interleukin-4 induced                         | This protein plays a central role in exerting IL4 mediated biological responses. It is found to induce the expression of BCL2L1/BCL-X(L), which is responsible for the anti-apoptotic activity of IL4. It also plays a role in differentiation of T helper 2 (Th2) cells, expression of cell surface markers, and class switch of immunoglobulins. |
| STAT5B  | signal transducer and activator of transcription 5B                                               | This protein mediates the signal transduction triggered by various cell ligands, such as IL2, IL4, CSF1, and different growth hormones. It is involved in TCR signaling, apoptosis, adult mammary gland development, and sexual dimorphism of liver gene expression.                                                                               |
| STUB1   | STIP1 homology and U-box containing protein 1                                                     |                                                                                                                                                                                                                                                                                                                                                    |
| STX4    | syntaxin 4                                                                                        |                                                                                                                                                                                                                                                                                                                                                    |
| TBK1    | TANK-binding kinase 1                                                                             | The protein encoded by this gene is similar to IKB kinases and can mediate NFkB activation in response to certain growth factors.                                                                                                                                                                                                                  |

|        |                                                                                                                  |                                                                                                                                                                                                                                     |
|--------|------------------------------------------------------------------------------------------------------------------|-------------------------------------------------------------------------------------------------------------------------------------------------------------------------------------------------------------------------------------|
| TFAP2C | transcription factor AP-2<br>gamma (activating enhancer<br>binding protein 2 gamma)                              | This protein plays a role in the development of the eyes, face, body wall, limbs, and neural tube.                                                                                                                                  |
| THBD   | thrombomodulin                                                                                                   | The binding of this protein to thrombin results in the activation of protein C, which degrades clotting factors Va and VIIIa and reduces the amount of thrombin generated.                                                          |
| TLR2   | toll-like receptor 2                                                                                             | This protein encoded by this gene is a member of the Toll-like receptor (TLR) family which plays a fundamental role in pathogen recognition and activation of innate immunity. It mediates host response to Gram-positive bacteria. |
| TMOD1  | tropomodulin 1                                                                                                   |                                                                                                                                                                                                                                     |
| TOP1   | topoisomerase (DNA) I                                                                                            | This enzyme catalyzes the transient breaking and rejoining of a single strand of DNA which allows the strands to pass through one another, thus altering the topology of DNA.                                                       |
| TP53   | tumor protein p53                                                                                                | This gene encodes tumor protein p53, which responds to diverse cellular stresses to regulate target genes that induce cell cycle arrest, apoptosis, senescence, DNA repair, or changes in metabolism.                               |
| TPM3   | tropomyosin 3                                                                                                    | This gene encodes a member of the tropomyosin family of actin-binding proteins involved in the contractile system of striated and smooth muscles and the cytoskeleton of non-muscle cells.                                          |
| TSC1   | tuberous sclerosis 1                                                                                             |                                                                                                                                                                                                                                     |
| TSC2   | tuberous sclerosis 2                                                                                             | This protein is a tumor suppressor and is able to stimulate specific GTPases.                                                                                                                                                       |
| TWSG1  | twisted gastrulation homolog<br>1 (Drosophila)                                                                   |                                                                                                                                                                                                                                     |
| TXN    | thioredoxin                                                                                                      | Thioredoxin is a 12-kD oxidoreductase enzyme containing a dithiol-disulfide active site.                                                                                                                                            |
| TYK2   | tyrosine kinase 2                                                                                                | This protein associates with cytokine receptors and promulgate cytokine signals by phosphorylating receptor subunits. It may play a role in anti-viral immunity.                                                                    |
| UBE2N  | ubiquitin-conjugating enzyme<br>E2N (UBC13 homolog,<br>yeast)                                                    | The modification of proteins with ubiquitin is an important cellular mechanism for targeting abnormal or short-lived proteins for degradation.                                                                                      |
| UBE4B  | ubiquitination factor E4B<br>(UFD2 homolog, yeast)                                                               | This protein is involved in multiubiquitin chain assembly.                                                                                                                                                                          |
| USF1   | upstream transcription factor<br>1                                                                               | This protein can activate transcription through pyrimidine-rich initiator (Inr) elements and E-box motifs.                                                                                                                          |
| VPRBP  | Vpr (HIV-1) binding protein                                                                                      |                                                                                                                                                                                                                                     |
| WASF2  | WAS protein family, member<br>2                                                                                  | This multiprotein complex serves to transduce signals that involve changes in cell shape, motility or function.                                                                                                                     |
| XRCC5  | X-ray repair complementing<br>defective repair in Chinese<br>hamster cells 5 (double-<br>strand-break rejoining) | This gene functionally complements Chinese hamster xrs-6, a mutant defective in DNA double-strand break repair and in ability to undergo V(D)J recombination.                                                                       |
| ZFR    | zinc finger RNA binding<br>protein                                                                               |                                                                                                                                                                                                                                     |

---

|                                                |                                                                                                    |                                                                                                                                                                                                                                                                              |
|------------------------------------------------|----------------------------------------------------------------------------------------------------|------------------------------------------------------------------------------------------------------------------------------------------------------------------------------------------------------------------------------------------------------------------------------|
| Organismal Survival: Viability AKT1 (2.14E-03) | v-akt murine thymoma viral oncogene homolog 1                                                      | In the developing nervous system AKT is a critical mediator of growth factor-induced neuronal survival. Survival factors can suppress apoptosis.                                                                                                                             |
| B2M                                            | beta-2-microglobulin                                                                               | Beta-2-microglobulin is a serum protein found in association with the major histocompatibility complex (MHC) class I heavy chain on the surface of nearly all nucleated cells.                                                                                               |
| DYRK1A                                         | dual-specificity tyrosine-(Y)-phosphorylation regulated kinase 1A                                  | This protein may play a significant role in a signaling pathway regulating cell proliferation and may be involved in brain development.                                                                                                                                      |
| EGFR                                           | epidermal growth factor receptor (erythroblastic leukemia viral (v-erb-b) oncogene homolog, avian) | Binding of this receptor to a ligand induces dimerization and tyrosine autophosphorylation and leads to cell proliferation.                                                                                                                                                  |
| ETV6                                           | ets variant 6                                                                                      | This gene encodes an ETS family transcription factor that it is required for hematopoiesis and maintenance of the developing vascular network.                                                                                                                               |
| FUS                                            | fusion (involved in t(12;16) in malignant liposarcoma)                                             |                                                                                                                                                                                                                                                                              |
| MAPK14                                         | mitogen-activated protein kinase 14                                                                | This kinase may be involved in stress related transcription and cell cycle regulation, as well as in genotoxic stress response.                                                                                                                                              |
| NFIC                                           | nuclear factor I/C (CCAAT-binding transcription factor)                                            |                                                                                                                                                                                                                                                                              |
| PFN1                                           | profilin 1                                                                                         | The protein encoded by this gene is a ubiquitous actin monomer-binding protein belonging to the profilin family. It is thought to regulate actin polymerization in response to extracellular signals. Deletion of this gene is associated with Miller-Dieker syndrome.       |
| POU2F1                                         | POU class 2 homeobox 1                                                                             |                                                                                                                                                                                                                                                                              |
| SMN1                                           | survival of motor neuron 1, telomeric                                                              | Within the nucleus, the protein localizes to subnuclear bodies called gems which are found near coiled bodies containing high concentrations of small ribonucleoproteins (snRNPs). It also interacts with several proteins known to be involved in the biogenesis of snRNPs. |
| STAT5B                                         | signal transducer and activator of transcription 5B                                                | This protein mediates the signal transduction triggered by various cell ligands, such as IL2, IL4, CSF1, and different growth hormones. It is involved in TCR signaling, apoptosis, adult mammary gland development, and sexual dimorphism of liver gene expression.         |
| TP53                                           | tumor protein p53                                                                                  | This gene encodes tumor protein p53, which responds to diverse cellular stresses to regulate target genes that induce cell cycle arrest, apoptosis, senescence, DNA repair, or changes in metabolism.                                                                        |
| TSC2                                           | tuberous sclerosis 2                                                                               | This protein is a tumor suppressor and is able to stimulate specific GTPases.                                                                                                                                                                                                |
| UBE2A                                          | ubiquitin-conjugating enzyme E2A (RAD6 homolog)                                                    | This enzyme is required for post-replicative DNA damage repair.                                                                                                                                                                                                              |

|       |                                                                                                        |                                                                                                                                                               |
|-------|--------------------------------------------------------------------------------------------------------|---------------------------------------------------------------------------------------------------------------------------------------------------------------|
| XRCC5 | X-ray repair complementing defective repair in Chinese hamster cells 5 (double-strand-break rejoining) | This gene functionally complements Chinese hamster xrs-6, a mutant defective in DNA double-strand break repair and in ability to undergo V(D)J recombination. |
| ZFR   | zinc finger RNA binding protein                                                                        |                                                                                                                                                               |
